# Supplementary material for: Active acoustic surveys reveal coastal fish community resistance to an environmental perturbation in South Florida
Source: PeerJ. 2023 Apr 27;11:e14888. doi: 10.7717/peerj.14888 (PMC10149053; doi:10.7717/peerj.14888)
Supplement: Supplemental Information 4 — Daily rainfall measurements from regional rain gauges queried from DBHYDRO [file peerj-11-14888-s004.xlsx]

## Sheet: Sheet1
Sum of ata_value_cm	Column Labels
	2015												Grand Total
	Qtr1			Qtr2			Qtr3			Qtr4
Row Labels	Jan	Feb	Mar	Apr	May	Jun	Jul	Aug	Sep	Oct	Nov	Dec
46	5.331	31.8498	10.9724	22.2512	14.6806	25.9584	34.4946	36.3704	51.9682	4.2152	22.1998	45.9216	306.213
49	8.7862	34.036	11.3786	21.6898	5.8924	8.0252	36.8814	50.2406	35.7132	5.2302	26.4644	19.048	263.386
70	11.9634	15.4178	6.6294	43.4594	28.6004	42.9514	33.02	43.0022	72.3138	16.002	30.5308	35.7124	379.603
72	2.0066	4.2926	1.9558	24.8158	5.3086	11.3284	11.4554	12.4968	15.1892	2.8956	10.9474	10.287	112.979
75	5.334	8.5852	11.1252	34.6456	22.4536	29.9212	23.2664	30.2768	29.972	8.9408	21.2852	20.0406	245.847
80	0	0	0	0.127	8.8392	5.8166	16.891	15.1892	17.7546	5.8166	6.5532	7.1374	84.1248
84	6.1468	10.3632	8.5344	22.2504	9.0424	22.098	16.7894	24.8666	24.6888	6.1214	22.098	21.971	194.97
97	4.4958	19.7612	23.2156	27.1272	7.62	12.7	40.513	37.2364	41.3258	7.5946	30.0228	22.225	273.837
153	11.0734	29.1836	8.1528	69.7218	8.1264	99.4408	96.1646	68.5784	106.679	6.8574	15.8978	35.9114	555.787
154	2.7432	6.4008	2.7432	12.573	2.6924	10.4902	12.5222	16.9926	15.875	3.4036	11.2522	8.763	106.451
386	12.2428	10.5664	5.08	24.892	13.3096	35.8394	32.1056	31.9532	46.3296	5.334	16.2052	16.5862	250.444
Grand Total	70.1232	170.457	89.7874	303.553	126.566	304.57	354.104	367.203	457.809	72.4114	213.457	243.604	2773.64
Row Labels	Jan	Feb	Mar	Apr	May	Jun	Jul	Aug	Sep	Oct	Nov	Dec
46	5.331	31.8498	10.9724	22.2512	14.6806	25.9584	34.4946	36.3704	51.9682	4.2152	22.1998	45.9216
49	8.7862	34.036	11.3786	21.6898	5.8924	8.0252	36.8814	50.2406	35.7132	5.2302	26.4644	19.048
70	11.9634	15.4178	6.6294	43.4594	28.6004	42.9514	33.02	43.0022	72.3138	16.002	30.5308	35.7124
72	2.0066	4.2926	1.9558	24.8158	5.3086	11.3284	11.4554	12.4968	15.1892	2.8956	10.9474	10.287
75	5.334	8.5852	11.1252	34.6456	22.4536	29.9212	23.2664	30.2768	29.972	8.9408	21.2852	20.0406
80	0	0	0	0.127	8.8392	5.8166	16.891	15.1892	17.7546	5.8166	6.5532	7.1374
84	6.1468	10.3632	8.5344	22.2504	9.0424	22.098	16.7894	24.8666	24.6888	6.1214	22.098	21.971
97	4.4958	19.7612	23.2156	27.1272	7.62	12.7	40.513	37.2364	41.3258	7.5946	30.0228	22.225
153	11.0734	29.1836	8.1528	69.7218	8.1264	99.4408	96.1646	68.5784	106.679	6.8574	15.8978	35.9114
154	2.7432	6.4008	2.7432	12.573	2.6924	10.4902	12.5222	16.9926	15.875	3.4036	11.2522	8.763
386	12.2428	10.5664	5.08	24.892	13.3096	35.8394	32.1056	31.9532	46.3296	5.334	16.2052	16.5862

## Sheet: Sheet4
Column Labels
46	49	70	72	75	80	84	97	153	154	386	(blank)	Grand Total

## Sheet: Rainfall_All_Stations
ID	station	station_clean	daily_date	data_value_in	ata_value_cm	station_clean_2
1	S153	153	2010-01-01	0.21	0.533	153		1978	S153	153	2015-06-01	0	0	153
2	S153	153	2010-01-02	0	0	153		1979	S153	153	2015-06-02	0.19	0.483	153
3	S153	153	2010-01-03	0	0	153		1980	S153	153	2015-06-03	0.17	0.432	153
4	S153	153	2010-01-04	0	0	153		1981	S153	153	2015-06-04	1.15	2.921	153
5	S153	153	2010-01-05	0	0	153		1982	S153	153	2015-06-05	0	0	153
6	S153	153	2010-01-06	0	0	153		1983	S153	153	2015-06-06	0.33	0.838	153
7	S153	153	2010-01-07	0	0	153		1984	S153	153	2015-06-07	0.31	0.787	153
8	S153	153	2010-01-08	0.01	0.025	153		1985	S153	153	2015-06-08	0.41	1.041	153
9	S153	153	2010-01-09	0.29	0.737	153		1986	S153	153	2015-06-09	0.18	0.457	153
10	S153	153	2010-01-10	0	0	153		1987	S153	153	2015-06-10	2.12	5.385	153
11	S153	153	2010-01-11	0	0	153		1988	S153	153	2015-06-11	0	0	153
12	S153	153	2010-01-12	0	0	153		1989	S153	153	2015-06-12	0	0	153
13	S153	153	2010-01-13	0	0	153		1990	S153	153	2015-06-13	0	0	153
14	S153	153	2010-01-14	0	0	153		1991	S153	153	2015-06-14	0	0	153
15	S153	153	2010-01-15	0.04	0.102	153		1992	S153	153	2015-06-15	0	0	153
16	S153	153	2010-01-16	0	0	153		1993	S153	153	2015-06-16	0	0	153
17	S153	153	2010-01-17	0.36	0.914	153		1994	S153	153	2015-06-17	0	0	153
18	S153	153	2010-01-18	0	0	153		1995	S153	153	2015-06-18	0.49	1.245	153
19	S153	153	2010-01-19	0	0	153		1996	S153	153	2015-06-19	0	0	153
20	S153	153	2010-01-20	0	0	153		1997	S153	153	2015-06-20	0.84	2.134	153
21	S153	153	2010-01-21	0	0	153		1998	S153	153	2015-06-21	0.03	0.076	153
22	S153	153	2010-01-22	0.12	0.305	153		1999	S153	153	2015-06-22	0.08	0.203	153
23	S153	153	2010-01-23	0	0	153		2000	S153	153	2015-06-23	0	0	153
24	S153	153	2010-01-24	0	0	153		2001	S153	153	2015-06-24	0.01	0.025	153
25	S153	153	2010-01-25	0.33	0.838	153		2002	S153	153	2015-06-25	0.01	0.025	153
26	S153	153	2010-01-26	0	0	153		2003	S153	153	2015-06-26	0.01	0.025	153
27	S153	153	2010-01-27	0	0	153		2004	S153	153	2015-06-27	1.09	2.769	153
28	S153	153	2010-01-28	0	0	153		2005	S153	153	2015-06-28	0	0	153
29	S153	153	2010-01-29	0	0	153		2006	S153	153	2015-06-29	0.59	1.499	153
30	S153	153	2010-01-30	0	0	153		2007	S153	153	2015-06-30	0.27	0.686	153
31	S153	153	2010-01-31	0	0	153		2008	S153	153	2015-07-01	0.02	0.051	153
32	S153	153	2010-02-01	0.35	0.889	153		2009	S153	153	2015-07-02	0	0	153
33	S153	153	2010-02-02	0	0	153		2010	S153	153	2015-07-03	0	0	153
34	S153	153	2010-02-03	0	0	153		2011	S153	153	2015-07-04	1.65	4.191	153
35	S153	153	2010-02-04	0	0	153		2012	S153	153	2015-07-05	0.02	0.051	153
36	S153	153	2010-02-05	0.11	0.279	153		2013	S153	153	2015-07-06	0.04	0.102	153
37	S153	153	2010-02-06	0	0	153		2014	S153	153	2015-07-07	1.21	3.073	153
38	S153	153	2010-02-07	0	0	153		2015	S153	153	2015-07-08	0	0	153
39	S153	153	2010-02-08	0	0	153		2016	S153	153	2015-07-09	0	0	153
40	S153	153	2010-02-09	0.08	0.203	153		2017	S153	153	2015-07-10	0	0	153
41	S153	153	2010-02-10	0	0	153		2018	S153	153	2015-07-11	0	0	153
42	S153	153	2010-02-11	0	0	153		2019	S153	153	2015-07-12	0	0	153
43	S153	153	2010-02-12	0.28	0.711	153		2020	S153	153	2015-07-13	0	0	153
44	S153	153	2010-02-13	0	0	153		2021	S153	153	2015-07-14	0	0	153
45	S153	153	2010-02-14	0	0	153		2022	S153	153	2015-07-15	0.18	0.457	153
46	S153	153	2010-02-15	0	0	153		2023	S153	153	2015-07-16	0.02	0.051	153
47	S153	153	2010-02-16	0	0	153		2024	S153	153	2015-07-17	0	0	153
48	S153	153	2010-02-17	0	0	153		2025	S153	153	2015-07-18	0	0	153
49	S153	153	2010-02-18	0	0	153		2026	S153	153	2015-07-19	0	0	153
50	S153	153	2010-02-19	0	0	153		2027	S153	153	2015-07-20	0	0	153
51	S153	153	2010-02-20	0	0	153		2028	S153	153	2015-07-21	0.75	1.905	153
52	S153	153	2010-02-21	0	0	153		2029	S153	153	2015-07-22	0.24	0.61	153
53	S153	153	2010-02-22	0	0	153		2030	S153	153	2015-07-23	0.04	0.102	153
54	S153	153	2010-02-23	0	0	153		2031	S153	153	2015-07-24	0.75	1.905	153
55	S153	153	2010-02-24	0.35	0.889	153		2032	S153	153	2015-07-25	0.26	0.66	153
56	S153	153	2010-02-25	0	0	153		2033	S153	153	2015-07-26	0.13	0.33	153
57	S153	153	2010-02-26	0	0	153		2034	S153	153	2015-07-27	0	0	153
58	S153	153	2010-02-27	0.03	0.076	153		2035	S153	153	2015-07-28	0	0	153
59	S153	153	2010-02-28	0	0	153		2036	S153	153	2015-07-29	0.2	0.508	153
60	S153	153	2010-03-01	0	0	153		2037	S153	153	2015-07-30	0	0	153
61	S153	153	2010-03-02	0.07	0.178	153		2038	S153	153	2015-07-31	2.51	6.375	153
62	S153	153	2010-03-03	0	0	153		2039	S153	153	2015-08-01	0.23	0.584	153
63	S153	153	2010-03-04	0	0	153		2040	S153	153	2015-08-02	0.08	0.203	153
64	S153	153	2010-03-05	0	0	153		2041	S153	153	2015-08-03	0	0	153
65	S153	153	2010-03-06	0	0	153		2042	S153	153	2015-08-04	0	0	153
66	S153	153	2010-03-07	0	0	153		2043	S153	153	2015-08-05	0.14	0.356	153
67	S153	153	2010-03-08	0	0	153		2044	S153	153	2015-08-06	0	0	153
68	S153	153	2010-03-09	0	0	153		2045	S153	153	2015-08-07	0	0	153
69	S153	153	2010-03-10	0	0	153		2046	S153	153	2015-08-08	0.02	0.051	153
70	S153	153	2010-03-11	2.41	6.121	153		2047	S153	153	2015-08-09	0	0	153
71	S153	153	2010-03-12	2.14	5.436	153		2048	S153	153	2015-08-10	0	0	153
72	S153	153	2010-03-13	0	0	153		2049	S153	153	2015-08-11	0	0	153
73	S153	153	2010-03-14	0	0	153		2050	S153	153	2015-08-12	0	0	153
74	S153	153	2010-03-15	0	0	153		2051	S153	153	2015-08-13	0.48	1.219	153
75	S153	153	2010-03-16	0	0	153		2052	S153	153	2015-08-14	0.15	0.381	153
76	S153	153	2010-03-17	0.06	0.152	153		2053	S153	153	2015-08-15	1.23	3.124	153
77	S153	153	2010-03-18	0	0	153		2054	S153	153	2015-08-16	0.01	0.025	153
78	S153	153	2010-03-19	0	0	153		2055	S153	153	2015-08-17	0	0	153
79	S153	153	2010-03-20	0	0	153		2056	S153	153	2015-08-18	0.04	0.102	153
80	S153	153	2010-03-21	0.36	0.914	153		2057	S153	153	2015-08-19	0.03	0.076	153
81	S153	153	2010-03-22	0.07	0.178	153		2058	S153	153	2015-08-20	0	0	153
82	S153	153	2010-03-23	0	0	153		2059	S153	153	2015-08-21	0	0	153
83	S153	153	2010-03-24	0	0	153		2060	S153	153	2015-08-22	0	0	153
84	S153	153	2010-03-25	0	0	153		2061	S153	153	2015-08-23	1	2.54	153
85	S153	153	2010-03-26	0	0	153		2062	S153	153	2015-08-24	0	0	153
86	S153	153	2010-03-27	0	0	153		2063	S153	153	2015-08-25	0.01	0.025	153
87	S153	153	2010-03-28	0.48	1.219	153		2064	S153	153	2015-08-26	0.1	0.254	153
88	S153	153	2010-03-29	0.81	2.057	153		2065	S153	153	2015-08-27	0.41	1.041	153
89	S153	153	2010-03-30	0	0	153		2066	S153	153	2015-08-28	0.3	0.762	153
90	S153	153	2010-03-31	0	0	153		2067	S153	153	2015-08-29	0.03	0.076	153
91	S153	153	2010-04-01	0	0	153		2068	S153	153	2015-08-30	0.47	1.194	153
92	S153	153	2010-04-02	0	0	153		2069	S153	153	2015-08-31	0.21	0.533	153
93	S153	153	2010-04-03	0	0	153		2070	S153	153	2015-09-01	0.13	0.33	153
94	S153	153	2010-04-04	0	0	153		2071	S153	153	2015-09-02	0	0	153
95	S153	153	2010-04-05	0	0	153		2072	S153	153	2015-09-03	0	0	153
96	S153	153	2010-04-06	0	0	153		2073	S153	153	2015-09-04	0	0	153
97	S153	153	2010-04-07	0	0	153		2074	S153	153	2015-09-05	0.84	2.134	153
98	S153	153	2010-04-08	0	0	153		2075	S153	153	2015-09-06	0	0	153
99	S153	153	2010-04-09	0	0	153		2076	S153	153	2015-09-07	0.12	0.305	153
100	S153	153	2010-04-10	0	0	153		2077	S153	153	2015-09-08	0.01	0.025	153
101	S153	153	2010-04-11	0.51	1.295	153		2078	S153	153	2015-09-09	0	0	153
102	S153	153	2010-04-12	0.32	0.813	153		2079	S153	153	2015-09-10	0	0	153
103	S153	153	2010-04-13	0	0	153		2080	S153	153	2015-09-11	1.93	4.902	153
104	S153	153	2010-04-14	0	0	153		2081	S153	153	2015-09-12	0.01	0.025	153
105	S153	153	2010-04-15	0	0	153		2082	S153	153	2015-09-13	0	0	153
106	S153	153	2010-04-16	0.1	0.254	153		2083	S153	153	2015-09-14	0.62	1.575	153
107	S153	153	2010-04-17	0	0	153		2084	S153	153	2015-09-15	0.1	0.254	153
108	S153	153	2010-04-18	0.53	1.346	153		2085	S153	153	2015-09-16	0.11	0.279	153
109	S153	153	2010-04-19	0.02	0.051	153		2086	S153	153	2015-09-17	3.42	8.687	153
110	S153	153	2010-04-20	0.08	0.203	153		2087	S153	153	2015-09-18	0.03	0.076	153
111	S153	153	2010-04-21	0	0	153		2088	S153	153	2015-09-19	0.23	0.584	153
112	S153	153	2010-04-22	0	0	153		2089	S153	153	2015-09-20	0	0	153
113	S153	153	2010-04-23	0	0	153		2090	S153	153	2015-09-21	0.01	0.025	153
114	S153	153	2010-04-24	0	0	153		2091	S153	153	2015-09-22	0.01	0.025	153
115	S153	153	2010-04-25	0	0	153		2092	S153	153	2015-09-23	0	0	153
116	S153	153	2010-04-26	4.09	10.389	153		2093	S153	153	2015-09-24	0.02	0.051	153
117	S153	153	2010-04-27	0	0	153		2094	S153	153	2015-09-25	0	0	153
118	S153	153	2010-04-28	0	0	153		2095	S153	153	2015-09-26	0.64	1.626	153
119	S153	153	2010-04-29	0	0	153		2096	S153	153	2015-09-27	0.05	0.127	153
120	S153	153	2010-04-30	0	0	153		2097	S153	153	2015-09-28	0	0	153
121	S153	153	2010-05-01	0	0	153		2098	S153	153	2015-09-29	0.08	0.203	153
122	S153	153	2010-05-02	0	0	153		2099	S153	153	2015-09-30	0	0	153
123	S153	153	2010-05-03	0	0	153		2100	S153	153	2015-10-01	0	0	153
124	S153	153	2010-05-04	0	0	153		2101	S153	153	2015-10-02	0.08	0.203	153
125	S153	153	2010-05-05	0	0	153		2102	S153	153	2015-10-03	0	0	153
126	S153	153	2010-05-06	0	0	153		2103	S153	153	2015-10-04	0.19	0.483	153
127	S153	153	2010-05-07	0	0	153		2104	S153	153	2015-10-05	0.04	0.102	153
128	S153	153	2010-05-08	0	0	153		2105	S153	153	2015-10-06	0	0	153
129	S153	153	2010-05-09	0	0	153		2106	S153	153	2015-10-07	0	0	153
130	S153	153	2010-05-10	0	0	153		2107	S153	153	2015-10-08	0	0	153
131	S153	153	2010-05-11	0	0	153		2108	S153	153	2015-10-09	0	0	153
132	S153	153	2010-05-12	0	0	153		2109	S153	153	2015-10-10	0.1	0.254	153
133	S153	153	2010-05-13	0	0	153		2110	S153	153	2015-10-11	0	0	153
134	S153	153	2010-05-14	0	0	153		2111	S153	153	2015-10-12	0	0	153
135	S153	153	2010-05-15	0	0	153		2112	S153	153	2015-10-13	0	0	153
136	S153	153	2010-05-16	0.08	0.203	153		2113	S153	153	2015-10-14	0	0	153
137	S153	153	2010-05-17	0.12	0.305	153		2114	S153	153	2015-10-15	0	0	153
138	S153	153	2010-05-18	0	0	153		2115	S153	153	2015-10-16	0	0	153
139	S153	153	2010-05-19	0	0	153		2116	S153	153	2015-10-17	0	0	153
140	S153	153	2010-05-20	0.47	1.194	153		2117	S153	153	2015-10-18	0.04	0.102	153
141	S153	153	2010-05-21	0	0	153		2118	S153	153	2015-10-19	0	0	153
142	S153	153	2010-05-22	0	0	153		2119	S153	153	2015-10-20	0	0	153
143	S153	153	2010-05-23	0	0	153		2120	S153	153	2015-10-21	0.01	0.025	153
144	S153	153	2010-05-24	0	0	153		2121	S153	153	2015-10-22	0.03	0.076	153
145	S153	153	2010-05-25	0.09	0.229	153		2122	S153	153	2015-10-23	0.03	0.076	153
146	S153	153	2010-05-26	0	0	153		2123	S153	153	2015-10-24	0	0	153
147	S153	153	2010-05-27	0	0	153		2124	S153	153	2015-10-25	0	0	153
148	S153	153	2010-05-28	0	0	153		2125	S153	153	2015-10-26	0.01	0.025	153
149	S153	153	2010-05-29	0.18	0.457	153		2126	S153	153	2015-10-27	0.01	0.025	153
150	S153	153	2010-05-30	0	0	153		2127	S153	153	2015-10-28	0	0	153
151	S153	153	2010-05-31	2.66	6.756	153		2128	S153	153	2015-10-29	0	0	153
152	S153	153	2010-06-01	0	0	153		2129	S153	153	2015-10-30	0	0	153
153	S153	153	2010-06-02	0	0	153		2130	S153	153	2015-10-31	0	0	153
154	S153	153	2010-06-03	0.47	1.194	153		2131	S153	153	2015-11-01	0	0	153
155	S153	153	2010-06-04	0.09	0.229	153		2132	S153	153	2015-11-02	0	0	153
156	S153	153	2010-06-05	0	0	153		2133	S153	153	2015-11-03	0	0	153
157	S153	153	2010-06-06	0.11	0.279	153		2134	S153	153	2015-11-04	0	0	153
158	S153	153	2010-06-07	0	0	153		2135	S153	153	2015-11-05	0	0	153
159	S153	153	2010-06-08	0	0	153		2136	S153	153	2015-11-06	0.01	0.025	153
160	S153	153	2010-06-09	0	0	153		2137	S153	153	2015-11-07	0	0	153
161	S153	153	2010-06-10	0	0	153		2138	S153	153	2015-11-08	0	0	153
162	S153	153	2010-06-11	0	0	153		2139	S153	153	2015-11-09	0.01	0.025	153
163	S153	153	2010-06-12	0	0	153		2140	S153	153	2015-11-10	0.05	0.127	153
164	S153	153	2010-06-13	1.09	2.769	153		2141	S153	153	2015-11-11	0	0	153
165	S153	153	2010-06-14	0	0	153		2142	S153	153	2015-11-12	0	0	153
166	S153	153	2010-06-15	0	0	153		2143	S153	153	2015-11-13	0	0	153
167	S153	153	2010-06-16	0.54	1.372	153		2144	S153	153	2015-11-14	0	0	153
168	S153	153	2010-06-17	0	0	153		2145	S153	153	2015-11-15	0	0	153
169	S153	153	2010-06-18	0.1	0.254	153		2146	S153	153	2015-11-16	0	0	153
170	S153	153	2010-06-19	0	0	153		2147	S153	153	2015-11-17	0	0	153
171	S153	153	2010-06-20	1.15	2.921	153		2148	S153	153	2015-11-18	0.12	0.305	153
172	S153	153	2010-06-21	0	0	153		2149	S153	153	2015-11-19	0.19	0.483	153
173	S153	153	2010-06-22	0	0	153		2150	S153	153	2015-11-20	0.01	0.025	153
174	S153	153	2010-06-23	0	0	153		2151	S153	153	2015-11-21	0.04	0.102	153
175	S153	153	2010-06-24	0	0	153		2152	S153	153	2015-11-22	0.76	1.93	153
176	S153	153	2010-06-25	0	0	153		2153	S153	153	2015-11-23	0	0	153
177	S153	153	2010-06-26	0.12	0.305	153		2154	S153	153	2015-11-24	0.01	0.025	153
178	S153	153	2010-06-27	0	0	153		2155	S153	153	2015-11-25	0.01	0.025	153
179	S153	153	2010-06-28	0	0	153		2156	S153	153	2015-11-26	0.01	0.025	153
180	S153	153	2010-06-29	0	0	153		2157	S153	153	2015-11-27	0	0	153
181	S153	153	2010-06-30	0.14	0.356	153		2158	S153	153	2015-11-28	0.01	0.025	153
182	S153	153	2010-07-01	0.62	1.575	153		2159	S153	153	2015-11-29	0	0	153
183	S153	153	2010-07-02	0.12	0.305	153		2160	S153	153	2015-11-30	0.01	0.025	153
184	S153	153	2010-07-03	0.19	0.483	153		4414	S46	46	2015-06-01	0	0	46
185	S153	153	2010-07-04	0.74	1.88	153		4415	S46	46	2015-06-02	0	0	46
186	S153	153	2010-07-05	1.97	5.004	153		4416	S46	46	2015-06-03	0.27	0.686	46
187	S153	153	2010-07-06	0	0	153		4417	S46	46	2015-06-04	0	0	46
188	S153	153	2010-07-07	0	0	153		4418	S46	46	2015-06-05	0	0	46
189	S153	153	2010-07-08	0	0	153		4419	S46	46	2015-06-06	0	0	46
190	S153	153	2010-07-09	0	0	153		4420	S46	46	2015-06-07	0	0	46
191	S153	153	2010-07-10	0	0	153		4421	S46	46	2015-06-08	0	0	46
192	S153	153	2010-07-11	0	0	153		4422	S46	46	2015-06-09	0.48	1.219	46
193	S153	153	2010-07-12	0	0	153		4423	S46	46	2015-06-10	2.66	6.756	46
194	S153	153	2010-07-13	0	0	153		4424	S46	46	2015-06-11	0.02	0.051	46
195	S153	153	2010-07-14	0.72	1.829	153		4425	S46	46	2015-06-12	0	0	46
196	S153	153	2010-07-15	0	0	153		4426	S46	46	2015-06-13	0	0	46
197	S153	153	2010-07-16	0	0	153		4427	S46	46	2015-06-14	0	0	46
198	S153	153	2010-07-17	0	0	153		4428	S46	46	2015-06-15	0	0	46
199	S153	153	2010-07-18	0	0	153		4429	S46	46	2015-06-16	0	0	46
200	S153	153	2010-07-19	0	0	153		4430	S46	46	2015-06-17	0	0	46
201	S153	153	2010-07-20	0	0	153		4431	S46	46	2015-06-18	0	0	46
202	S153	153	2010-07-21	0	0	153		4432	S46	46	2015-06-19	0	0	46
203	S153	153	2010-07-22	0	0	153		4433	S46	46	2015-06-20	0	0	46
204	S153	153	2010-07-23	0.9	2.286	153		4434	S46	46	2015-06-21	0	0	46
205	S153	153	2010-07-24	0	0	153		4435	S46	46	2015-06-22	0	0	46
206	S153	153	2010-07-25	0.11	0.279	153		4436	S46	46	2015-06-23	0	0	46
207	S153	153	2010-07-26	0	0	153		4437	S46	46	2015-06-24	0	0	46
208	S153	153	2010-07-27	0.04	0.102	153		4438	S46	46	2015-06-25	0.82	2.083	46
209	S153	153	2010-07-28	0	0	153		4439	S46	46	2015-06-26	0	0	46
210	S153	153	2010-07-29	0	0	153		4440	S46	46	2015-06-27	0	0	46
211	S153	153	2010-07-30	0	0	153		4441	S46	46	2015-06-28	0.31	0.787	46
212	S153	153	2010-07-31	0.13	0.33	153		4442	S46	46	2015-06-29	0.33	0.838	46
213	S153	153	2010-08-01	0	0	153		4443	S46	46	2015-06-30	0.22	0.559	46
214	S153	153	2010-08-02	0	0	153		4444	S46	46	2015-07-01	0	0	46
215	S153	153	2010-08-03	0.32	0.813	153		4445	S46	46	2015-07-02	0	0	46
216	S153	153	2010-08-04	0	0	153		4446	S46	46	2015-07-03	0	0	46
217	S153	153	2010-08-05	0.02	0.051	153		4447	S46	46	2015-07-04	0.2	0.508	46
218	S153	153	2010-08-06	0	0	153		4448	S46	46	2015-07-05	0.02	0.051	46
219	S153	153	2010-08-07	0	0	153		4449	S46	46	2015-07-06	0.24	0.61	46
220	S153	153	2010-08-08	0.48	1.219	153		4450	S46	46	2015-07-07	0.07	0.178	46
221	S153	153	2010-08-09	0.07	0.178	153		4451	S46	46	2015-07-08	0	0	46
222	S153	153	2010-08-10	0.63	1.6	153		4452	S46	46	2015-07-09	0.04	0.102	46
223	S153	153	2010-08-11	0	0	153		4453	S46	46	2015-07-10	0	0	46
224	S153	153	2010-08-12	0	0	153		4454	S46	46	2015-07-11	0	0	46
225	S153	153	2010-08-13	0.56	1.422	153		4455	S46	46	2015-07-12	0	0	46
226	S153	153	2010-08-14	0.01	0.025	153		4456	S46	46	2015-07-13	0	0	46
227	S153	153	2010-08-15	0.07	0.178	153		4457	S46	46	2015-07-14	0	0	46
228	S153	153	2010-08-16	0.59	1.499	153		4458	S46	46	2015-07-15	0.78	1.981	46
229	S153	153	2010-08-17	0.11	0.279	153		4459	S46	46	2015-07-16	0.12	0.305	46
230	S153	153	2010-08-18	0.24	0.61	153		4460	S46	46	2015-07-17	1.69	4.293	46
231	S153	153	2010-08-19	0	0	153		4461	S46	46	2015-07-18	0.01	0.025	46
232	S153	153	2010-08-20	0.11	0.279	153		4462	S46	46	2015-07-19	0	0	46
233	S153	153	2010-08-21	0.66	1.676	153		4463	S46	46	2015-07-20	0.21	0.533	46
234	S153	153	2010-08-22	0.27	0.686	153		4464	S46	46	2015-07-21	0	0	46
235	S153	153	2010-08-23	0.82	2.083	153		4465	S46	46	2015-07-22	0.31	0.787	46
236	S153	153	2010-08-24	0.01	0.025	153		4466	S46	46	2015-07-23	0.55	1.397	46
237	S153	153	2010-08-25	0	0	153		4467	S46	46	2015-07-24	0.21	0.533	46
238	S153	153	2010-08-26	0.94	2.388	153		4468	S46	46	2015-07-25	1.14	2.896	46
239	S153	153	2010-08-27	0	0	153		4469	S46	46	2015-07-26	0.2	0.508	46
240	S153	153	2010-08-28	0	0	153		4470	S46	46	2015-07-27	0.14	0.356	46
241	S153	153	2010-08-29	0.21	0.533	153		4471	S46	46	2015-07-28	0	0	46
242	S153	153	2010-08-30	0.01	0.025	153		4472	S46	46	2015-07-29	0	0	46
243	S153	153	2010-08-31	0.15	0.381	153		4473	S46	46	2015-07-30	0.09	0.229	46
244	S153	153	2010-09-01	0	0	153		4474	S46	46	2015-07-31	0.77	1.956	46
245	S153	153	2010-09-02	0	0	153		4475	S46	46	2015-08-01	0.08	0.203	46
246	S153	153	2010-09-03	0	0	153		4476	S46	46	2015-08-02	0.03	0.076	46
247	S153	153	2010-09-04	0.01	0.025	153		4477	S46	46	2015-08-03	0.11	0.279	46
248	S153	153	2010-09-05	0.03	0.076	153		4478	S46	46	2015-08-04	0.01	0.025	46
249	S153	153	2010-09-06	0.07	0.178	153		4479	S46	46	2015-08-05	0.08	0.203	46
250	S153	153	2010-09-07	0	0	153		4480	S46	46	2015-08-06	0	0	46
251	S153	153	2010-09-08	0	0	153		4481	S46	46	2015-08-07	0	0	46
252	S153	153	2010-09-09	0	0	153		4482	S46	46	2015-08-08	0	0	46
253	S153	153	2010-09-10	0	0	153		4483	S46	46	2015-08-09	0	0	46
254	S153	153	2010-09-11	0	0	153		4484	S46	46	2015-08-10	0.34	0.864	46
255	S153	153	2010-09-12	0	0	153		4485	S46	46	2015-08-11	0	0	46
256	S153	153	2010-09-13	0	0	153		4486	S46	46	2015-08-12	0	0	46
257	S153	153	2010-09-14	0	0	153		4487	S46	46	2015-08-13	0.6	1.524	46
258	S153	153	2010-09-15	0	0	153		4488	S46	46	2015-08-14	0	0	46
259	S153	153	2010-09-16	0	0	153		4489	S46	46	2015-08-15	0.41	1.041	46
260	S153	153	2010-09-17	0	0	153		4490	S46	46	2015-08-16	0.36	0.914	46
261	S153	153	2010-09-18	0	0	153		4491	S46	46	2015-08-17	0	0	46
262	S153	153	2010-09-19	0	0	153		4492	S46	46	2015-08-18	0	0	46
263	S153	153	2010-09-20	0	0	153		4493	S46	46	2015-08-19	0	0	46
264	S153	153	2010-09-21	0.37	0.94	153		4494	S46	46	2015-08-20	0	0	46
265	S153	153	2010-09-22	0.24	0.61	153		4495	S46	46	2015-08-21	0	0	46
266	S153	153	2010-09-23	0.26	0.66	153		4496	S46	46	2015-08-22	0	0	46
267	S153	153	2010-09-24	0	0	153		4497	S46	46	2015-08-23	0	0	46
268	S153	153	2010-09-25	0	0	153		4498	S46	46	2015-08-24	0	0	46
269	S153	153	2010-09-26	0	0	153		4499	S46	46	2015-08-25	0.02	0.051	46
270	S153	153	2010-09-27	0.28	0.711	153		4500	S46	46	2015-08-26	0.21	0.533	46
271	S153	153	2010-09-28	0.22	0.559	153		4501	S46	46	2015-08-27	1.56	3.962	46
272	S153	153	2010-09-29	0.23	0.584	153		4502	S46	46	2015-08-28	1.1	2.794	46
273	S153	153	2010-09-30	0	0	153		4503	S46	46	2015-08-29	0.09	0.229	46
274	S153	153	2010-10-01	0	0	153		4504	S46	46	2015-08-30	2.16	5.486	46
275	S153	153	2010-10-02	0	0	153		4505	S46	46	2015-08-31	0	0	46
276	S153	153	2010-10-03	0	0	153		4506	S46	46	2015-09-01	0	0	46
277	S153	153	2010-10-04	0	0	153		4507	S46	46	2015-09-02	0	0	46
278	S153	153	2010-10-05	0	0	153		4508	S46	46	2015-09-03	0.16	0.406	46
279	S153	153	2010-10-06	0	0	153		4509	S46	46	2015-09-04	0.37	0.94	46
280	S153	153	2010-10-07	0	0	153		4510	S46	46	2015-09-05	1.74	4.42	46
281	S153	153	2010-10-08	0	0	153		4511	S46	46	2015-09-06	0	0	46
282	S153	153	2010-10-09	0	0	153		4512	S46	46	2015-09-07	0.68	1.727	46
283	S153	153	2010-10-10	0.01	0.025	153		4513	S46	46	2015-09-08	0	0	46
284	S153	153	2010-10-11	0	0	153		4514	S46	46	2015-09-09	0	0	46
285	S153	153	2010-10-12	0	0	153		4515	S46	46	2015-09-10	0	0	46
286	S153	153	2010-10-13	0	0	153		4516	S46	46	2015-09-11	0.02	0.051	46
287	S153	153	2010-10-14	0	0	153		4517	S46	46	2015-09-12	0	0	46
288	S153	153	2010-10-15	0	0	153		4518	S46	46	2015-09-13	0.42	1.067	46
289	S153	153	2010-10-16	0	0	153		4519	S46	46	2015-09-14	0	0	46
290	S153	153	2010-10-17	0	0	153		4520	S46	46	2015-09-15	0.9	2.286	46
291	S153	153	2010-10-18	0	0	153		4521	S46	46	2015-09-16	2.91	7.391	46
292	S153	153	2010-10-19	0	0	153		4522	S46	46	2015-09-17	1.97	5.004	46
293	S153	153	2010-10-20	0.1	0.254	153		4523	S46	46	2015-09-18	0.07	0.178	46
294	S153	153	2010-10-21	0	0	153		4524	S46	46	2015-09-19	0.08	0.203	46
295	S153	153	2010-10-22	0	0	153		4525	S46	46	2015-09-20	0	0	46
296	S153	153	2010-10-23	0	0	153		4526	S46	46	2015-09-21	0	0	46
297	S153	153	2010-10-24	0	0	153		4527	S46	46	2015-09-22	0.07	0.178	46
298	S153	153	2010-10-25	0	0	153		4528	S46	46	2015-09-23	0.02	0.051	46
299	S153	153	2010-10-26	0	0	153		4529	S46	46	2015-09-24	0.13	0.33	46
300	S153	153	2010-10-27	0	0	153		4530	S46	46	2015-09-25	0.21	0.533	46
301	S153	153	2010-10-28	0	0	153		4531	S46	46	2015-09-26	0	0	46
302	S153	153	2010-10-29	0	0	153		4532	S46	46	2015-09-27	0	0	46
303	S153	153	2010-10-30	0	0	153		4533	S46	46	2015-09-28	0.47	1.194	46
304	S153	153	2010-10-31	0	0	153		4534	S46	46	2015-09-29	0.01	0.025	46
305	S153	153	2010-11-01	0	0	153		4535	S46	46	2015-09-30	0	0	46
306	S153	153	2010-11-02	0	0	153		4536	S46	46	2015-10-01	0	0	46
307	S153	153	2010-11-03	0.24	0.61	153		4537	S46	46	2015-10-02	0	0	46
308	S153	153	2010-11-04	0.19	0.483	153		4538	S46	46	2015-10-03	0	0	46
309	S153	153	2010-11-05	0	0	153		4539	S46	46	2015-10-04	0.07	0.178	46
310	S153	153	2010-11-06	0	0	153		4540	S46	46	2015-10-05	0.12	0.305	46
311	S153	153	2010-11-07	0	0	153		4541	S46	46	2015-10-06	0.01	0.025	46
312	S153	153	2010-11-08	0	0	153		4542	S46	46	2015-10-07	0	0	46
313	S153	153	2010-11-09	0	0	153		4543	S46	46	2015-10-08	0.23	0.584	46
314	S153	153	2010-11-10	0	0	153		4544	S46	46	2015-10-09	0.02	0.051	46
315	S153	153	2010-11-11	0	0	153		4545	S46	46	2015-10-10	0	0	46
316	S153	153	2010-11-12	0	0	153		4546	S46	46	2015-10-11	0	0	46
317	S153	153	2010-11-13	0	0	153		4547	S46	46	2015-10-12	0	0	46
318	S153	153	2010-11-14	0	0	153		4548	S46	46	2015-10-13	0	0	46
319	S153	153	2010-11-15	0	0	153		4549	S46	46	2015-10-14	0	0	46
320	S153	153	2010-11-16	0	0	153		4550	S46	46	2015-10-15	0.01	0.025	46
321	S153	153	2010-11-17	0	0	153		4551	S46	46	2015-10-16	0	0	46
322	S153	153	2010-11-18	0	0	153		4552	S46	46	2015-10-17	0	0	46
323	S153	153	2010-11-19	0	0	153		4553	S46	46	2015-10-18	0	0	46
324	S153	153	2010-11-20	0	0	153		4554	S46	46	2015-10-19	0	0	46
325	S153	153	2010-11-21	0	0	153		4555	S46	46	2015-10-20	0	0	46
326	S153	153	2010-11-22	0	0	153		4556	S46	46	2015-10-21	0.23	0.584	46
327	S153	153	2010-11-23	0	0	153		4557	S46	46	2015-10-22	0.12	0.305	46
328	S153	153	2010-11-24	0	0	153		4558	S46	46	2015-10-23	0	0	46
329	S153	153	2010-11-25	0	0	153		4559	S46	46	2015-10-24	0	0	46
330	S153	153	2010-11-26	0	0	153		4560	S46	46	2015-10-25	0	0	46
331	S153	153	2010-11-27	0	0	153		4561	S46	46	2015-10-26	0	0	46
332	S153	153	2010-11-28	0	0	153		4562	S46	46	2015-10-27	0.01	0.025	46
333	S153	153	2010-11-29	0	0	153		4563	S46	46	2015-10-28	0.01	0.025	46
334	S153	153	2010-11-30	0.08	0.203	153		4564	S46	46	2015-10-29	0	0	46
335	S153	153	2010-12-01	0	0	153		4565	S46	46	2015-10-30	0	0	46
336	S153	153	2010-12-02	0	0	153		4566	S46	46	2015-10-31	0	0	46
337	S153	153	2010-12-03	0	0	153		4567	S46	46	2015-11-01	0	0	46
338	S153	153	2010-12-04	0	0	153		4568	S46	46	2015-11-02	0	0	46
339	S153	153	2010-12-05	0	0	153		4569	S46	46	2015-11-03	0	0	46
340	S153	153	2010-12-06	0	0	153		4570	S46	46	2015-11-04	0	0	46
341	S153	153	2010-12-07	0	0	153		4571	S46	46	2015-11-05	0	0	46
342	S153	153	2010-12-08	0	0	153		4572	S46	46	2015-11-06	0	0	46
343	S153	153	2010-12-09	0.22	0.559	153		4573	S46	46	2015-11-07	0.07	0.178	46
344	S153	153	2010-12-10	0	0	153		4574	S46	46	2015-11-08	0	0	46
345	S153	153	2010-12-11	0	0	153		4575	S46	46	2015-11-09	0	0	46
346	S153	153	2010-12-12	0	0	153		4576	S46	46	2015-11-10	0	0	46
347	S153	153	2010-12-13	0	0	153		4577	S46	46	2015-11-11	0.02	0.051	46
348	S153	153	2010-12-14	0	0	153		4578	S46	46	2015-11-12	0	0	46
349	S153	153	2010-12-15	0	0	153		4579	S46	46	2015-11-13	0.75	1.905	46
350	S153	153	2010-12-16	0	0	153		4580	S46	46	2015-11-14	0.02	0.051	46
351	S153	153	2010-12-17	0	0	153		4581	S46	46	2015-11-15	0	0	46
352	S153	153	2010-12-18	0.24	0.61	153		4582	S46	46	2015-11-16	0.03	0.076	46
353	S153	153	2010-12-19	0	0	153		4583	S46	46	2015-11-17	0.07	0.178	46
354	S153	153	2010-12-20	0	0	153		4584	S46	46	2015-11-18	0.2	0.508	46
355	S153	153	2010-12-21	0	0	153		4585	S46	46	2015-11-19	0.02	0.051	46
356	S153	153	2010-12-22	0	0	153		4586	S46	46	2015-11-20	0.31	0.787	46
357	S153	153	2010-12-23	0	0	153		4587	S46	46	2015-11-21	2.13	5.41	46
358	S153	153	2010-12-24	0	0	153		4588	S46	46	2015-11-22	0.37	0.94	46
359	S153	153	2010-12-25	0	0	153		4589	S46	46	2015-11-23	0	0	46
360	S153	153	2010-12-26	0.07	0.178	153		4590	S46	46	2015-11-24	0	0	46
361	S153	153	2010-12-27	0	0	153		4591	S46	46	2015-11-25	0.02	0.051	46
362	S153	153	2010-12-28	0	0	153		4592	S46	46	2015-11-26	0.15	0.381	46
363	S153	153	2010-12-29	0	0	153		4593	S46	46	2015-11-27	0.21	0.533	46
364	S153	153	2010-12-30	0	0	153		4594	S46	46	2015-11-28	0	0	46
365	S153	153	2010-12-31	0	0	153		4595	S46	46	2015-11-29	0	0	46
366	S153	153	2011-01-01	0	0	153		4596	S46	46	2015-11-30	0	0	46
367	S153	153	2011-01-02	0	0	153		6850	S49	49	2015-06-01	0	0	49
368	S153	153	2011-01-03	0	0	153		6851	S49	49	2015-06-02	0	0	49
369	S153	153	2011-01-04	0	0	153		6852	S49	49	2015-06-03	0.08	0.203	49
370	S153	153	2011-01-05	0	0	153		6853	S49	49	2015-06-04	0	0	49
371	S153	153	2011-01-06	0.37	0.94	153		6854	S49	49	2015-06-05	0	0	49
372	S153	153	2011-01-07	0	0	153		6855	S49	49	2015-06-06	0	0	49
373	S153	153	2011-01-08	0	0	153		6856	S49	49	2015-06-07	0.01	0.025	49
374	S153	153	2011-01-09	0	0	153		6857	S49	49	2015-06-08	0	0	49
375	S153	153	2011-01-10	0	0	153		6858	S49	49	2015-06-09	0.02	0.051	49
376	S153	153	2011-01-11	0	0	153		6859	S49	49	2015-06-10	1.18	2.997	49
377	S153	153	2011-01-12	0	0	153		6860	S49	49	2015-06-11	0.02	0.051	49
378	S153	153	2011-01-13	0	0	153		6861	S49	49	2015-06-12	0	0	49
379	S153	153	2011-01-14	0	0	153		6862	S49	49	2015-06-13	0	0	49
380	S153	153	2011-01-15	0	0	153		6863	S49	49	2015-06-14	0	0	49
381	S153	153	2011-01-16	0	0	153		6864	S49	49	2015-06-15	0	0	49
382	S153	153	2011-01-17	0.02	0.051	153		6865	S49	49	2015-06-16	0	0	49
383	S153	153	2011-01-18	0	0	153		6866	S49	49	2015-06-17	0	0	49
384	S153	153	2011-01-19	0.06	0.152	153		6867	S49	49	2015-06-18	0	0	49
385	S153	153	2011-01-20	0	0	153		6868	S49	49	2015-06-19	0	0	49
386	S153	153	2011-01-21	0	0	153		6869	S49	49	2015-06-20	0	0	49
387	S153	153	2011-01-22	0	0	153		6870	S49	49	2015-06-21	0.01	0.025	49
388	S153	153	2011-01-23	0	0	153		6871	S49	49	2015-06-22	0.01	0.025	49
389	S153	153	2011-01-24	0	0	153		6872	S49	49	2015-06-23	0	0	49
390	S153	153	2011-01-25	0.86	2.184	153		6873	S49	49	2015-06-24	0	0	49
391	S153	153	2011-01-26	0	0	153		6874	S49	49	2015-06-25	0	0	49
392	S153	153	2011-01-27	0	0	153		6875	S49	49	2015-06-26	0	0	49
393	S153	153	2011-01-28	0	0	153		6876	S49	49	2015-06-27	0	0	49
394	S153	153	2011-01-29	0	0	153		6877	S49	49	2015-06-28	0	0	49
395	S153	153	2011-01-30	0	0	153		6878	S49	49	2015-06-29	0.07	0.178	49
396	S153	153	2011-01-31	0	0	153		6879	S49	49	2015-06-30	0.18	0.457	49
397	S153	153	2011-02-01	0	0	153		6880	S49	49	2015-07-01	0.01	0.025	49
398	S153	153	2011-02-02	0	0	153		6881	S49	49	2015-07-02	0	0	49
399	S153	153	2011-02-03	0	0	153		6882	S49	49	2015-07-03	0	0	49
400	S153	153	2011-02-04	0	0	153		6883	S49	49	2015-07-04	0	0	49
401	S153	153	2011-02-05	0	0	153		6884	S49	49	2015-07-05	0.3	0.762	49
402	S153	153	2011-02-06	0	0	153		6885	S49	49	2015-07-06	0.25	0.635	49
403	S153	153	2011-02-07	0	0	153		6886	S49	49	2015-07-07	0.02	0.051	49
404	S153	153	2011-02-08	0	0	153		6887	S49	49	2015-07-08	0	0	49
405	S153	153	2011-02-09	0	0	153		6888	S49	49	2015-07-09	0	0	49
406	S153	153	2011-02-10	0.22	0.559	153		6889	S49	49	2015-07-10	0	0	49
407	S153	153	2011-02-11	0.05	0.127	153		6890	S49	49	2015-07-11	0	0	49
408	S153	153	2011-02-12	0	0	153		6891	S49	49	2015-07-12	0	0	49
409	S153	153	2011-02-13	0	0	153		6892	S49	49	2015-07-13	0	0	49
410	S153	153	2011-02-14	0	0	153		6893	S49	49	2015-07-14	0	0	49
411	S153	153	2011-02-15	0	0	153		6894	S49	49	2015-07-15	0.06	0.152	49
412	S153	153	2011-02-16	0	0	153		6895	S49	49	2015-07-16	0.94	2.388	49
413	S153	153	2011-02-17	0	0	153		6896	S49	49	2015-07-17	0.1	0.254	49
414	S153	153	2011-02-18	0	0	153		6897	S49	49	2015-07-18	0.54	1.372	49
415	S153	153	2011-02-19	0	0	153		6898	S49	49	2015-07-19	0	0	49
416	S153	153	2011-02-20	0	0	153		6899	S49	49	2015-07-20	1.91	4.851	49
417	S153	153	2011-02-21	0	0	153		6900	S49	49	2015-07-21	0.01	0.025	49
418	S153	153	2011-02-22	0	0	153		6901	S49	49	2015-07-22	0.64	1.626	49
419	S153	153	2011-02-23	0	0	153		6902	S49	49	2015-07-23	0.47	1.194	49
420	S153	153	2011-02-24	0	0	153		6903	S49	49	2015-07-24	0.25	0.635	49
421	S153	153	2011-02-25	0	0	153		6904	S49	49	2015-07-25	0.32	0.813	49
422	S153	153	2011-02-26	0	0	153		6905	S49	49	2015-07-26	0.04	0.102	49
423	S153	153	2011-02-27	0	0	153		6906	S49	49	2015-07-27	0	0	49
424	S153	153	2011-02-28	0	0	153		6907	S49	49	2015-07-28	0	0	49
425	S153	153	2011-03-01	0	0	153		6908	S49	49	2015-07-29	0.28	0.711	49
426	S153	153	2011-03-02	0	0	153		6909	S49	49	2015-07-30	0.34	0.864	49
427	S153	153	2011-03-03	0	0	153		6910	S49	49	2015-07-31	0.78	1.981	49
428	S153	153	2011-03-04	0	0	153		6911	S49	49	2015-08-01	2.12	5.385	49
429	S153	153	2011-03-05	0.16	0.406	153		6912	S49	49	2015-08-02	0.01	0.025	49
430	S153	153	2011-03-06	0	0	153		6913	S49	49	2015-08-03	0	0	49
431	S153	153	2011-03-07	0	0	153		6914	S49	49	2015-08-04	0	0	49
432	S153	153	2011-03-08	0	0	153		6915	S49	49	2015-08-05	0.45	1.143	49
433	S153	153	2011-03-09	0	0	153		6916	S49	49	2015-08-06	0.01	0.025	49
434	S153	153	2011-03-10	0.12	0.305	153		6917	S49	49	2015-08-07	0	0	49
435	S153	153	2011-03-11	0	0	153		6918	S49	49	2015-08-08	0.01	0.025	49
436	S153	153	2011-03-12	0	0	153		6919	S49	49	2015-08-09	0	0	49
437	S153	153	2011-03-13	0	0	153		6920	S49	49	2015-08-10	0	0	49
438	S153	153	2011-03-14	0	0	153		6921	S49	49	2015-08-11	0	0	49
439	S153	153	2011-03-15	0	0	153		6922	S49	49	2015-08-12	0	0	49
440	S153	153	2011-03-16	0	0	153		6923	S49	49	2015-08-13	1.15	2.921	49
441	S153	153	2011-03-17	0	0	153		6924	S49	49	2015-08-14	0.4	1.016	49
442	S153	153	2011-03-18	0	0	153		6925	S49	49	2015-08-15	0.24	0.61	49
443	S153	153	2011-03-19	0	0	153		6926	S49	49	2015-08-16	0.14	0.356	49
444	S153	153	2011-03-20	0	0	153		6927	S49	49	2015-08-17	0.41	1.041	49
445	S153	153	2011-03-21	0	0	153		6928	S49	49	2015-08-18	0.6	1.524	49
446	S153	153	2011-03-22	0	0	153		6929	S49	49	2015-08-19	0	0	49
447	S153	153	2011-03-23	0	0	153		6930	S49	49	2015-08-20	0	0	49
448	S153	153	2011-03-24	0	0	153		6931	S49	49	2015-08-21	0.09	0.229	49
449	S153	153	2011-03-25	0	0	153		6932	S49	49	2015-08-22	0.01	0.025	49
450	S153	153	2011-03-26	0	0	153		6933	S49	49	2015-08-23	0	0	49
451	S153	153	2011-03-27	0	0	153		6934	S49	49	2015-08-24	0	0	49
452	S153	153	2011-03-28	1.1	2.794	153		6935	S49	49	2015-08-25	1.13	2.87	49
453	S153	153	2011-03-29	0.18	0.457	153		6936	S49	49	2015-08-26	1.5	3.81	49
454	S153	153	2011-03-30	0	0	153		6937	S49	49	2015-08-27	0.1	0.254	49
455	S153	153	2011-03-31	0.08	0.203	153		6938	S49	49	2015-08-28	0.11	0.279	49
456	S153	153	2011-04-01	0	0	153		6939	S49	49	2015-08-29	0.14	0.356	49
457	S153	153	2011-04-02	0	0	153		6940	S49	49	2015-08-30	1	2.54	49
458	S153	153	2011-04-03	0	0	153		6941	S49	49	2015-08-31	0.27	0.686	49
459	S153	153	2011-04-04	0	0	153		6942	S49	49	2015-09-01	0.02	0.051	49
460	S153	153	2011-04-05	0.24	0.61	153		6943	S49	49	2015-09-02	0	0	49
461	S153	153	2011-04-06	0	0	153		6944	S49	49	2015-09-03	0.34	0.864	49
462	S153	153	2011-04-07	0	0	153		6945	S49	49	2015-09-04	0.01	0.025	49
463	S153	153	2011-04-08	0	0	153		6946	S49	49	2015-09-05	0.34	0.864	49
464	S153	153	2011-04-09	0	0	153		6947	S49	49	2015-09-06	0.07	0.178	49
465	S153	153	2011-04-10	0	0	153		6948	S49	49	2015-09-07	0.8	2.032	49
466	S153	153	2011-04-11	0	0	153		6949	S49	49	2015-09-08	0	0	49
467	S153	153	2011-04-12	0	0	153		6950	S49	49	2015-09-09	0.15	0.381	49
468	S153	153	2011-04-13	0	0	153		6951	S49	49	2015-09-10	0	0	49
469	S153	153	2011-04-14	0	0	153		6952	S49	49	2015-09-11	0.12	0.305	49
470	S153	153	2011-04-15	0	0	153		6953	S49	49	2015-09-12	0.01	0.025	49
471	S153	153	2011-04-16	0.01	0.025	153		6954	S49	49	2015-09-13	0.02	0.051	49
472	S153	153	2011-04-17	0	0	153		6955	S49	49	2015-09-14	0	0	49
473	S153	153	2011-04-18	0	0	153		6956	S49	49	2015-09-15	0.16	0.406	49
474	S153	153	2011-04-19	0	0	153		6957	S49	49	2015-09-16	1.59	4.039	49
475	S153	153	2011-04-20	0	0	153		6958	S49	49	2015-09-17	2.7	6.858	49
476	S153	153	2011-04-21	0	0	153		6959	S49	49	2015-09-18	0.36	0.914	49
477	S153	153	2011-04-22	0	0	153		6960	S49	49	2015-09-19	0.01	0.025	49
478	S153	153	2011-04-23	0	0	153		6961	S49	49	2015-09-20	0	0	49
479	S153	153	2011-04-24	0	0	153		6962	S49	49	2015-09-21	0.01	0.025	49
480	S153	153	2011-04-25	0	0	153		6963	S49	49	2015-09-22	0	0	49
481	S153	153	2011-04-26	0.11	0.279	153		6964	S49	49	2015-09-23	0	0	49
482	S153	153	2011-04-27	0	0	153		6965	S49	49	2015-09-24	0	0	49
483	S153	153	2011-04-28	0	0	153		6966	S49	49	2015-09-25	0.19	0.483	49
484	S153	153	2011-04-29	0	0	153		6967	S49	49	2015-09-26	0.02	0.051	49
485	S153	153	2011-04-30	0	0	153		6968	S49	49	2015-09-27	0	0	49
486	S153	153	2011-05-01	0	0	153		6969	S49	49	2015-09-28	0	0	49
487	S153	153	2011-05-02	0	0	153		6970	S49	49	2015-09-29	0.09	0.229	49
488	S153	153	2011-05-03	0	0	153		6971	S49	49	2015-09-30	0.02	0.051	49
489	S153	153	2011-05-04	0	0	153		6972	S49	49	2015-10-01	0	0	49
490	S153	153	2011-05-05	0	0	153		6973	S49	49	2015-10-02	0	0	49
491	S153	153	2011-05-06	0	0	153		6974	S49	49	2015-10-03	0	0	49
492	S153	153	2011-05-07	0	0	153		6975	S49	49	2015-10-04	0.35	0.889	49
493	S153	153	2011-05-08	0	0	153		6976	S49	49	2015-10-05	0.01	0.025	49
494	S153	153	2011-05-09	0	0	153		6977	S49	49	2015-10-06	0	0	49
495	S153	153	2011-05-10	0	0	153		6978	S49	49	2015-10-07	0	0	49
496	S153	153	2011-05-11	0	0	153		6979	S49	49	2015-10-08	0.03	0.076	49
497	S153	153	2011-05-12	0	0	153		6980	S49	49	2015-10-09	0	0	49
498	S153	153	2011-05-13	0	0	153		6981	S49	49	2015-10-10	0.06	0.152	49
499	S153	153	2011-05-14	0.79	2.007	153		6982	S49	49	2015-10-11	0.01	0.025	49
500	S153	153	2011-05-15	0.03	0.076	153		6983	S49	49	2015-10-12	0	0	49
501	S153	153	2011-05-16	0	0	153		6984	S49	49	2015-10-13	0	0	49
502	S153	153	2011-05-17	0	0	153		6985	S49	49	2015-10-14	0	0	49
503	S153	153	2011-05-18	0	0	153		6986	S49	49	2015-10-15	0	0	49
504	S153	153	2011-05-19	0	0	153		6987	S49	49	2015-10-16	0	0	49
505	S153	153	2011-05-20	0	0	153		6988	S49	49	2015-10-17	0	0	49
506	S153	153	2011-05-21	0	0	153		6989	S49	49	2015-10-18	0.01	0.025	49
507	S153	153	2011-05-22	0	0	153		6990	S49	49	2015-10-19	0	0	49
508	S153	153	2011-05-23	0	0	153		6991	S49	49	2015-10-20	0	0	49
509	S153	153	2011-05-24	0	0	153		6992	S49	49	2015-10-21	0.01	0.025	49
510	S153	153	2011-05-25	0	0	153		6993	S49	49	2015-10-22	0.35	0.889	49
511	S153	153	2011-05-26	0	0	153		6994	S49	49	2015-10-23	0.16	0.406	49
512	S153	153	2011-05-27	0	0	153		6995	S49	49	2015-10-24	0	0	49
513	S153	153	2011-05-28	0	0	153		6996	S49	49	2015-10-25	0	0	49
514	S153	153	2011-05-29	0	0	153		6997	S49	49	2015-10-26	0	0	49
515	S153	153	2011-05-30	0	0	153		6998	S49	49	2015-10-27	0	0	49
516	S153	153	2011-05-31	0	0	153		6999	S49	49	2015-10-28	0.02	0.051	49
517	S153	153	2011-06-01	0	0	153		7000	S49	49	2015-10-29	0.02	0.051	49
518	S153	153	2011-06-02	0	0	153		7001	S49	49	2015-10-30	0	0	49
519	S153	153	2011-06-03	0	0	153		7002	S49	49	2015-10-31	0	0	49
520	S153	153	2011-06-04	0	0	153		7003	S49	49	2015-11-01	0	0	49
521	S153	153	2011-06-05	0	0	153		7004	S49	49	2015-11-02	0	0	49
522	S153	153	2011-06-06	0	0	153		7005	S49	49	2015-11-03	0	0	49
523	S153	153	2011-06-07	0	0	153		7006	S49	49	2015-11-04	0.03	0.076	49
524	S153	153	2011-06-08	0	0	153		7007	S49	49	2015-11-05	0	0	49
525	S153	153	2011-06-09	0	0	153		7008	S49	49	2015-11-06	0	0	49
526	S153	153	2011-06-10	0	0	153		7009	S49	49	2015-11-07	0.03	0.076	49
527	S153	153	2011-06-11	0	0	153		7010	S49	49	2015-11-08	0	0	49
528	S153	153	2011-06-12	0	0	153		7011	S49	49	2015-11-09	0	0	49
529	S153	153	2011-06-13	0	0	153		7012	S49	49	2015-11-10	0	0	49
530	S153	153	2011-06-14	0.23	0.584	153		7013	S49	49	2015-11-11	0	0	49
531	S153	153	2011-06-15	0.68	1.727	153		7014	S49	49	2015-11-12	0	0	49
532	S153	153	2011-06-16	0	0	153		7015	S49	49	2015-11-13	0.23	0.584	49
533	S153	153	2011-06-17	0	0	153		7016	S49	49	2015-11-14	0	0	49
534	S153	153	2011-06-18	0.01	0.025	153		7017	S49	49	2015-11-15	0	0	49
535	S153	153	2011-06-19	0	0	153		7018	S49	49	2015-11-16	1.04	2.642	49
536	S153	153	2011-06-20	0.14	0.356	153		7019	S49	49	2015-11-17	0	0	49
537	S153	153	2011-06-21	0	0	153		7020	S49	49	2015-11-18	0.46	1.168	49
538	S153	153	2011-06-22	0.03	0.076	153		7021	S49	49	2015-11-19	0.45	1.143	49
539	S153	153	2011-06-23	0.11	0.279	153		7022	S49	49	2015-11-20	1.26	3.2	49
540	S153	153	2011-06-24	0	0	153		7023	S49	49	2015-11-21	1.08	2.743	49
541	S153	153	2011-06-25	0.22	0.559	153		7024	S49	49	2015-11-22	0.28	0.711	49
542	S153	153	2011-06-26	0.04	0.102	153		7025	S49	49	2015-11-23	0	0	49
543	S153	153	2011-06-27	0.43	1.092	153		7026	S49	49	2015-11-24	0.02	0.051	49
544	S153	153	2011-06-28	1.34	3.404	153		7027	S49	49	2015-11-25	0.15	0.381	49
545	S153	153	2011-06-29	0	0	153		7028	S49	49	2015-11-26	0.06	0.152	49
546	S153	153	2011-06-30	0	0	153		7029	S49	49	2015-11-27	0.01	0.025	49
547	S153	153	2011-07-01	0	0	153		7030	S49	49	2015-11-28	0.01	0.025	49
548	S153	153	2011-07-02	0.32	0.813	153		7031	S49	49	2015-11-29	0	0	49
549	S153	153	2011-07-03	1.06	2.692	153		7032	S49	49	2015-11-30	0.1	0.254	49
550	S153	153	2011-07-04	0.27	0.686	153		8678	S386B_R	386	2015-06-01	0	0	386
551	S153	153	2011-07-05	0	0	153		8679	S386B_R	386	2015-06-02	0.03	0.0762	386
552	S153	153	2011-07-06	0	0	153		8680	S386B_R	386	2015-06-03	0.2	0.508	386
553	S153	153	2011-07-07	0.4	1.016	153		8681	S386B_R	386	2015-06-04	0	0	386
554	S153	153	2011-07-08	0.02	0.051	153		8682	S386B_R	386	2015-06-05	0	0	386
555	S153	153	2011-07-09	0	0	153		8683	S386B_R	386	2015-06-06	0.56	1.4224	386
556	S153	153	2011-07-10	0	0	153		8684	S386B_R	386	2015-06-07	0	0	386
557	S153	153	2011-07-11	0	0	153		8685	S386B_R	386	2015-06-08	1.09	2.7686	386
558	S153	153	2011-07-12	0	0	153		8686	S386B_R	386	2015-06-09	0.14	0.3556	386
559	S153	153	2011-07-13	0.05	0.127	153		8687	S386B_R	386	2015-06-10	2.24	5.6896	386
560	S153	153	2011-07-14	0.32	0.813	153		8688	S386B_R	386	2015-06-11	0.2	0.508	386
561	S153	153	2011-07-15	0	0	153		8689	S386B_R	386	2015-06-12	0	0	386
562	S153	153	2011-07-16	0	0	153		8690	S386B_R	386	2015-06-13	0	0	386
563	S153	153	2011-07-17	0	0	153		8691	S386B_R	386	2015-06-14	0	0	386
564	S153	153	2011-07-18	0.03	0.076	153		8692	S386B_R	386	2015-06-15	0	0	386
565	S153	153	2011-07-19	0	0	153		8693	S386B_R	386	2015-06-16	0.04	0.1016	386
566	S153	153	2011-07-20	0	0	153		8694	S386B_R	386	2015-06-17	0	0	386
567	S153	153	2011-07-21	0	0	153		8695	S386B_R	386	2015-06-18	0	0	386
568	S153	153	2011-07-22	0.8	2.032	153		8696	S386B_R	386	2015-06-19	0	0	386
569	S153	153	2011-07-23	0.58	1.473	153		8697	S386B_R	386	2015-06-20	0.27	0.6858	386
570	S153	153	2011-07-24	0	0	153		8698	S386B_R	386	2015-06-21	0	0	386
571	S153	153	2011-07-25	0	0	153		8699	S386B_R	386	2015-06-22	0	0	386
572	S153	153	2011-07-26	0.93	2.362	153		8700	S386B_R	386	2015-06-23	0	0	386
573	S153	153	2011-07-27	0	0	153		8701	S386B_R	386	2015-06-24	0	0	386
574	S153	153	2011-07-28	0	0	153		8702	S386B_R	386	2015-06-25	0.8	2.032	386
575	S153	153	2011-07-29	0	0	153		8703	S386B_R	386	2015-06-26	0.11	0.2794	386
576	S153	153	2011-07-30	0	0	153		8704	S386B_R	386	2015-06-27	0.01	0.0254	386
577	S153	153	2011-07-31	0.5	1.27	153		8705	S386B_R	386	2015-06-28	0.01	0.0254	386
578	S153	153	2011-08-01	0	0	153		8706	S386B_R	386	2015-06-29	0.46	1.1684	386
579	S153	153	2011-08-02	0.27	0.686	153		8707	S386B_R	386	2015-06-30	1.1	2.794	386
580	S153	153	2011-08-03	0.03	0.076	153		8708	S386B_R	386	2015-07-01	0.06	0.1524	386
581	S153	153	2011-08-04	0	0	153		8709	S386B_R	386	2015-07-02	0	0	386
582	S153	153	2011-08-05	0	0	153		8710	S386B_R	386	2015-07-03	0.03	0.0762	386
583	S153	153	2011-08-06	0	0	153		8711	S386B_R	386	2015-07-04	0.22	0.5588	386
584	S153	153	2011-08-07	0.61	1.549	153		8712	S386B_R	386	2015-07-05	0.73	1.8542	386
585	S153	153	2011-08-08	0.1	0.254	153		8713	S386B_R	386	2015-07-06	0.01	0.0254	386
586	S153	153	2011-08-09	0.16	0.406	153		8714	S386B_R	386	2015-07-07	1.39	3.5306	386
587	S153	153	2011-08-10	0.33	0.838	153		8715	S386B_R	386	2015-07-08	0.01	0.0254	386
588	S153	153	2011-08-11	0	0	153		8716	S386B_R	386	2015-07-09	0	0	386
589	S153	153	2011-08-12	0	0	153		8717	S386B_R	386	2015-07-10	0	0	386
590	S153	153	2011-08-13	0	0	153		8718	S386B_R	386	2015-07-11	0	0	386
591	S153	153	2011-08-14	0	0	153		8719	S386B_R	386	2015-07-12	0	0	386
592	S153	153	2011-08-15	0	0	153		8720	S386B_R	386	2015-07-13	0	0	386
593	S153	153	2011-08-16	0	0	153		8721	S386B_R	386	2015-07-14	0	0	386
594	S153	153	2011-08-17	0.34	0.864	153		8722	S386B_R	386	2015-07-15	0.07	0.1778	386
595	S153	153	2011-08-18	0.86	2.184	153		8723	S386B_R	386	2015-07-16	0.02	0.0508	386
596	S153	153	2011-08-19	0.04	0.102	153		8724	S386B_R	386	2015-07-17	0.06	0.1524	386
597	S153	153	2011-08-20	0.58	1.473	153		8725	S386B_R	386	2015-07-18	0	0	386
598	S153	153	2011-08-21	0	0	153		8726	S386B_R	386	2015-07-19	0	0	386
599	S153	153	2011-08-22	0	0	153		8727	S386B_R	386	2015-07-20	0	0	386
600	S153	153	2011-08-23	1.27	3.226	153		8728	S386B_R	386	2015-07-21	0.37	0.9398	386
601	S153	153	2011-08-24	0	0	153		8729	S386B_R	386	2015-07-22	0.21	0.5334	386
602	S153	153	2011-08-25	0.58	1.473	153		8730	S386B_R	386	2015-07-23	0.01	0.0254	386
603	S153	153	2011-08-26	0	0	153		8731	S386B_R	386	2015-07-24	1.21	3.0734	386
604	S153	153	2011-08-27	0	0	153		8732	S386B_R	386	2015-07-25	1.07	2.7178	386
605	S153	153	2011-08-28	0	0	153		8733	S386B_R	386	2015-07-26	0.09	0.2286	386
606	S153	153	2011-08-29	0.29	0.737	153		8734	S386B_R	386	2015-07-27	0.09	0.2286	386
607	S153	153	2011-08-30	0.03	0.076	153		8735	S386B_R	386	2015-07-28	0	0	386
608	S153	153	2011-08-31	0.01	0.025	153		8736	S386B_R	386	2015-07-29	0.54	1.3716	386
609	S153	153	2011-09-01	2.26	5.74	153		8737	S386B_R	386	2015-07-30	0.13	0.3302	386
610	S153	153	2011-09-02	0	0	153		8738	S386B_R	386	2015-07-31	0	0	386
611	S153	153	2011-09-03	0	0	153		8739	S386B_R	386	2015-08-01	0.7	1.778	386
612	S153	153	2011-09-04	0.02	0.051	153		8740	S386B_R	386	2015-08-02	0.2	0.508	386
613	S153	153	2011-09-05	0.04	0.102	153		8741	S386B_R	386	2015-08-03	0	0	386
614	S153	153	2011-09-06	0.15	0.381	153		8742	S386B_R	386	2015-08-04	0	0	386
615	S153	153	2011-09-07	0.05	0.127	153		8743	S386B_R	386	2015-08-05	0	0	386
616	S153	153	2011-09-08	0.75	1.905	153		8744	S386B_R	386	2015-08-06	0	0	386
617	S153	153	2011-09-09	0	0	153		8745	S386B_R	386	2015-08-07	0	0	386
618	S153	153	2011-09-10	0.18	0.457	153		8746	S386B_R	386	2015-08-08	0.16	0.4064	386
619	S153	153	2011-09-11	0.44	1.118	153		8747	S386B_R	386	2015-08-09	0	0	386
620	S153	153	2011-09-12	0	0	153		8748	S386B_R	386	2015-08-10	0	0	386
621	S153	153	2011-09-13	0	0	153		8749	S386B_R	386	2015-08-11	0	0	386
622	S153	153	2011-09-14	0	0	153		8750	S386B_R	386	2015-08-12	0.24	0.6096	386
623	S153	153	2011-09-15	0	0	153		8751	S386B_R	386	2015-08-13	0.3	0.762	386
624	S153	153	2011-09-16	0	0	153		8752	S386B_R	386	2015-08-14	0	0	386
625	S153	153	2011-09-17	0	0	153		8753	S386B_R	386	2015-08-15	0.01	0.0254	386
626	S153	153	2011-09-18	0.18	0.457	153		8754	S386B_R	386	2015-08-16	0.1	0.254	386
627	S153	153	2011-09-19	0.03	0.076	153		8755	S386B_R	386	2015-08-17	0.11	0.2794	386
628	S153	153	2011-09-20	0	0	153		8756	S386B_R	386	2015-08-18	0.04	0.1016	386
629	S153	153	2011-09-21	0	0	153		8757	S386B_R	386	2015-08-19	0	0	386
630	S153	153	2011-09-22	0.42	1.067	153		8758	S386B_R	386	2015-08-20	0	0	386
631	S153	153	2011-09-23	0	0	153		8759	S386B_R	386	2015-08-21	0.03	0.0762	386
632	S153	153	2011-09-24	0	0	153		8760	S386B_R	386	2015-08-22	0.04	0.1016	386
633	S153	153	2011-09-25	0.34	0.864	153		8761	S386B_R	386	2015-08-23	0.01	0.0254	386
634	S153	153	2011-09-26	0	0	153		8762	S386B_R	386	2015-08-24	0.28	0.7112	386
635	S153	153	2011-09-27	0	0	153		8763	S386B_R	386	2015-08-25	0.01	0.0254	386
636	S153	153	2011-09-28	0.12	0.305	153		8764	S386B_R	386	2015-08-26	0	0	386
637	S153	153	2011-09-29	0	0	153		8765	S386B_R	386	2015-08-27	0.01	0.0254	386
638	S153	153	2011-09-30	0	0	153		8766	S386B_R	386	2015-08-28	1.79	4.5466	386
639	S153	153	2011-10-01	0	0	153		8767	S386B_R	386	2015-08-29	0.44	1.1176	386
640	S153	153	2011-10-02	0	0	153		8768	S386B_R	386	2015-08-30	1.79	4.5466	386
641	S153	153	2011-10-03	0	0	153		8769	S386B_R	386	2015-08-31	0.03	0.0762	386
642	S153	153	2011-10-04	0	0	153		8770	S386B_R	386	2015-09-01	0.01	0.0254	386
643	S153	153	2011-10-05	0	0	153		8771	S386B_R	386	2015-09-02	0	0	386
644	S153	153	2011-10-06	0.06	0.152	153		8772	S386B_R	386	2015-09-03	0	0	386
645	S153	153	2011-10-07	0.37	0.94	153		8773	S386B_R	386	2015-09-04	0	0	386
646	S153	153	2011-10-08	0.53	1.346	153		8774	S386B_R	386	2015-09-05	1.76	4.4704	386
647	S153	153	2011-10-09	0.21	0.533	153		8775	S386B_R	386	2015-09-06	0.46	1.1684	386
648	S153	153	2011-10-10	0.1	0.254	153		8776	S386B_R	386	2015-09-07	0.01	0.0254	386
649	S153	153	2011-10-11	0.05	0.127	153		8777	S386B_R	386	2015-09-08	0	0	386
650	S153	153	2011-10-12	0.06	0.152	153		8778	S386B_R	386	2015-09-09	0	0	386
651	S153	153	2011-10-13	0.14	0.356	153		8779	S386B_R	386	2015-09-10	0.13	0.3302	386
652	S153	153	2011-10-14	0	0	153		8780	S386B_R	386	2015-09-11	0.66	1.6764	386
653	S153	153	2011-10-15	0	0	153		8781	S386B_R	386	2015-09-12	0.09	0.2286	386
654	S153	153	2011-10-16	0	0	153		8782	S386B_R	386	2015-09-13	0.3	0.762	386
655	S153	153	2011-10-17	0.05	0.127	153		8783	S386B_R	386	2015-09-14	1.69	4.2926	386
656	S153	153	2011-10-18	1.59	4.039	153		8784	S386B_R	386	2015-09-15	0.46	1.1684	386
657	S153	153	2011-10-19	0.03	0.076	153		8785	S386B_R	386	2015-09-16	0.48	1.2192	386
658	S153	153	2011-10-20	0	0	153		8786	S386B_R	386	2015-09-17	1.44	3.6576	386
659	S153	153	2011-10-21	0	0	153		8787	S386B_R	386	2015-09-18	0.01	0.0254	386
660	S153	153	2011-10-22	0	0	153		8788	S386B_R	386	2015-09-19	0.01	0.0254	386
661	S153	153	2011-10-23	0	0	153		8789	S386B_R	386	2015-09-20	0	0	386
662	S153	153	2011-10-24	0	0	153		8790	S386B_R	386	2015-09-21	0	0	386
663	S153	153	2011-10-25	0	0	153		8791	S386B_R	386	2015-09-22	0.01	0.0254	386
664	S153	153	2011-10-26	0	0	153		8792	S386B_R	386	2015-09-23	0.09	0.2286	386
665	S153	153	2011-10-27	0	0	153		8793	S386B_R	386	2015-09-24	0.01	0.0254	386
666	S153	153	2011-10-28	0.85	2.159	153		8794	S386B_R	386	2015-09-25	0.05	0.127	386
667	S153	153	2011-10-29	0.72	1.829	153		8795	S386B_R	386	2015-09-26	0.09	0.2286	386
668	S153	153	2011-10-30	0.01	0.025	153		8796	S386B_R	386	2015-09-27	0.99	2.5146	386
669	S153	153	2011-10-31	0.01	0.025	153		8797	S386B_R	386	2015-09-28	0	0	386
670	S153	153	2011-11-01	0	0	153		8798	S386B_R	386	2015-09-29	0.37	0.9398	386
671	S153	153	2011-11-02	0	0	153		8799	S386B_R	386	2015-09-30	0	0	386
672	S153	153	2011-11-03	0	0	153		8800	S386B_R	386	2015-10-01	0	0	386
673	S153	153	2011-11-04	0	0	153		8801	S386B_R	386	2015-10-02	0	0	386
674	S153	153	2011-11-05	0	0	153		8802	S386B_R	386	2015-10-03	0	0	386
675	S153	153	2011-11-06	0.01	0.025	153		8803	S386B_R	386	2015-10-04	0.31	0.7874	386
676	S153	153	2011-11-07	0	0	153		8804	S386B_R	386	2015-10-05	0	0	386
677	S153	153	2011-11-08	0	0	153		8805	S386B_R	386	2015-10-06	0	0	386
678	S153	153	2011-11-09	0	0	153		8806	S386B_R	386	2015-10-07	0	0	386
679	S153	153	2011-11-10	0	0	153		8807	S386B_R	386	2015-10-08	0	0	386
680	S153	153	2011-11-11	0	0	153		8808	S386B_R	386	2015-10-09	0.33	0.8382	386
681	S153	153	2011-11-12	0	0	153		8809	S386B_R	386	2015-10-10	0.26	0.6604	386
682	S153	153	2011-11-13	0	0	153		8810	S386B_R	386	2015-10-11	0.06	0.1524	386
683	S153	153	2011-11-14	0.06	0.152	153		8811	S386B_R	386	2015-10-12	0	0	386
684	S153	153	2011-11-15	0	0	153		8812	S386B_R	386	2015-10-13	0	0	386
685	S153	153	2011-11-16	0	0	153		8813	S386B_R	386	2015-10-14	0	0	386
686	S153	153	2011-11-17	0	0	153		8814	S386B_R	386	2015-10-15	0	0	386
687	S153	153	2011-11-18	0.01	0.025	153		8815	S386B_R	386	2015-10-16	0	0	386
688	S153	153	2011-11-19	0	0	153		8816	S386B_R	386	2015-10-17	0	0	386
689	S153	153	2011-11-20	0.1	0.254	153		8817	S386B_R	386	2015-10-18	0	0	386
690	S153	153	2011-11-21	0.01	0.025	153		8818	S386B_R	386	2015-10-19	0	0	386
691	S153	153	2011-11-22	0	0	153		8819	S386B_R	386	2015-10-20	0	0	386
692	S153	153	2011-11-23	0	0	153		8820	S386B_R	386	2015-10-21	0	0	386
693	S153	153	2011-11-24	0	0	153		8821	S386B_R	386	2015-10-22	0	0	386
694	S153	153	2011-11-25	0	0	153		8822	S386B_R	386	2015-10-23	0.08	0.2032	386
695	S153	153	2011-11-26	0	0	153		8823	S386B_R	386	2015-10-24	0	0	386
696	S153	153	2011-11-27	0	0	153		8824	S386B_R	386	2015-10-25	0	0	386
697	S153	153	2011-11-28	0	0	153		8825	S386B_R	386	2015-10-26	0.01	0.0254	386
698	S153	153	2011-11-29	0	0	153		8826	S386B_R	386	2015-10-27	0	0	386
699	S153	153	2011-11-30	0	0	153		8827	S386B_R	386	2015-10-28	0	0	386
700	S153	153	2011-12-01	0	0	153		8828	S386B_R	386	2015-10-29	0	0	386
701	S153	153	2011-12-02	0	0	153		8829	S386B_R	386	2015-10-30	0	0	386
702	S153	153	2011-12-03	0	0	153		8830	S386B_R	386	2015-10-31	0	0	386
703	S153	153	2011-12-04	0	0	153		8831	S386B_R	386	2015-11-01	0	0	386
704	S153	153	2011-12-05	0	0	153		8832	S386B_R	386	2015-11-02	0	0	386
705	S153	153	2011-12-06	0	0	153		8833	S386B_R	386	2015-11-03	0	0	386
706	S153	153	2011-12-07	0	0	153		8834	S386B_R	386	2015-11-04	0	0	386
707	S153	153	2011-12-08	0	0	153		8835	S386B_R	386	2015-11-05	0	0	386
708	S153	153	2011-12-09	0.19	0.483	153		8836	S386B_R	386	2015-11-06	0.01	0.0254	386
709	S153	153	2011-12-10	0	0	153		8837	S386B_R	386	2015-11-07	0	0	386
710	S153	153	2011-12-11	0.03	0.076	153		8838	S386B_R	386	2015-11-08	0	0	386
711	S153	153	2011-12-12	0.06	0.152	153		8839	S386B_R	386	2015-11-09	0	0	386
712	S153	153	2011-12-13	0.01	0.025	153		8840	S386B_R	386	2015-11-10	0.35	0.889	386
713	S153	153	2011-12-14	0	0	153		8841	S386B_R	386	2015-11-11	0.01	0.0254	386
714	S153	153	2011-12-15	0	0	153		8842	S386B_R	386	2015-11-12	0	0	386
715	S153	153	2011-12-16	0	0	153		8843	S386B_R	386	2015-11-13	0.43	1.0922	386
716	S153	153	2011-12-17	0	0	153		8844	S386B_R	386	2015-11-14	0	0	386
717	S153	153	2011-12-18	0	0	153		8845	S386B_R	386	2015-11-15	0	0	386
718	S153	153	2011-12-19	0	0	153		8846	S386B_R	386	2015-11-16	0	0	386
719	S153	153	2011-12-20	0	0	153		8847	S386B_R	386	2015-11-17	0.02	0.0508	386
720	S153	153	2011-12-21	0	0	153		8848	S386B_R	386	2015-11-18	0.12	0.3048	386
721	S153	153	2011-12-22	0	0	153		8849	S386B_R	386	2015-11-19	0.17	0.4318	386
722	S153	153	2011-12-23	0	0	153		8850	S386B_R	386	2015-11-20	0.01	0.0254	386
723	S153	153	2011-12-24	0	0	153		8851	S386B_R	386	2015-11-21	0.27	0.6858	386
724	S153	153	2011-12-25	0	0	153		8852	S386B_R	386	2015-11-22	1.63	4.1402	386
725	S153	153	2011-12-26	0	0	153		8853	S386B_R	386	2015-11-23	0	0	386
726	S153	153	2011-12-27	0.07	0.178	153		8854	S386B_R	386	2015-11-24	0	0	386
727	S153	153	2011-12-28	0	0	153		8855	S386B_R	386	2015-11-25	0.05	0.127	386
728	S153	153	2011-12-29	0	0	153		8856	S386B_R	386	2015-11-26	0.06	0.1524	386
729	S153	153	2011-12-30	0	0	153		8857	S386B_R	386	2015-11-27	0.05	0.127	386
730	S153	153	2011-12-31	0	0	153		8858	S386B_R	386	2015-11-28	0.01	0.0254	386
731	S153	153	2012-01-01	0	0	153		8859	S386B_R	386	2015-11-29	0	0	386
732	S153	153	2012-01-02	0	0	153		8860	S386B_R	386	2015-11-30	0	0	386
733	S153	153	2012-01-03	0	0	153		11114	S154_R	154	2015-06-01	0.07	0.1778	154
734	S153	153	2012-01-04	0	0	153		11115	S154_R	154	2015-06-02	0.06	0.1524	154
735	S153	153	2012-01-05	0	0	153		11116	S154_R	154	2015-06-03	0.55	1.397	154
736	S153	153	2012-01-06	0	0	153		11117	S154_R	154	2015-06-04	0	0	154
737	S153	153	2012-01-07	0	0	153		11118	S154_R	154	2015-06-05	0	0	154
738	S153	153	2012-01-08	0	0	153		11119	S154_R	154	2015-06-06	0	0	154
739	S153	153	2012-01-09	0	0	153		11120	S154_R	154	2015-06-07	0	0	154
740	S153	153	2012-01-10	0	0	153		11121	S154_R	154	2015-06-08	0	0	154
741	S153	153	2012-01-11	0	0	153		11122	S154_R	154	2015-06-09	0.36	0.9144	154
742	S153	153	2012-01-12	0	0	153		11123	S154_R	154	2015-06-10	1.41	3.5814	154
743	S153	153	2012-01-13	0	0	153		11124	S154_R	154	2015-06-11	0.07	0.1778	154
744	S153	153	2012-01-14	0	0	153		11125	S154_R	154	2015-06-12	0	0	154
745	S153	153	2012-01-15	0	0	153		11126	S154_R	154	2015-06-13	0	0	154
746	S153	153	2012-01-16	0	0	153		11127	S154_R	154	2015-06-14	0	0	154
747	S153	153	2012-01-17	0	0	153		11128	S154_R	154	2015-06-15	0	0	154
748	S153	153	2012-01-18	0	0	153		11129	S154_R	154	2015-06-16	0.09	0.2286	154
749	S153	153	2012-01-19	0	0	153		11130	S154_R	154	2015-06-17	0	0	154
750	S153	153	2012-01-20	0	0	153		11131	S154_R	154	2015-06-18	0	0	154
751	S153	153	2012-01-21	0	0	153		11132	S154_R	154	2015-06-19	0	0	154
752	S153	153	2012-01-22	0	0	153		11133	S154_R	154	2015-06-20	0	0	154
753	S153	153	2012-01-23	0	0	153		11134	S154_R	154	2015-06-21	0	0	154
754	S153	153	2012-01-24	0	0	153		11135	S154_R	154	2015-06-22	0	0	154
755	S153	153	2012-01-25	0.02	0.051	153		11136	S154_R	154	2015-06-23	0	0	154
756	S153	153	2012-01-26	0	0	153		11137	S154_R	154	2015-06-24	0	0	154
757	S153	153	2012-01-27	0.08	0.203	153		11138	S154_R	154	2015-06-25	0.05	0.127	154
758	S153	153	2012-01-28	0	0	153		11139	S154_R	154	2015-06-26	0.01	0.0254	154
759	S153	153	2012-01-29	0	0	153		11140	S154_R	154	2015-06-27	0.04	0.1016	154
760	S153	153	2012-01-30	0	0	153		11141	S154_R	154	2015-06-28	0	0	154
761	S153	153	2012-01-31	0	0	153		11142	S154_R	154	2015-06-29	0.37	0.9398	154
762	S153	153	2012-02-01	0	0	153		11143	S154_R	154	2015-06-30	1.05	2.667	154
763	S153	153	2012-02-02	0	0	153		11144	S154_R	154	2015-07-01	0	0	154
764	S153	153	2012-02-03	0	0	153		11145	S154_R	154	2015-07-02	0	0	154
765	S153	153	2012-02-04	0	0	153		11146	S154_R	154	2015-07-03	0.26	0.6604	154
766	S153	153	2012-02-05	0	0	153		11147	S154_R	154	2015-07-04	0	0	154
767	S153	153	2012-02-06	0.4	1.016	153		11148	S154_R	154	2015-07-05	0.64	1.6256	154
768	S153	153	2012-02-07	0.01	0.025	153		11149	S154_R	154	2015-07-06	0.01	0.0254	154
769	S153	153	2012-02-08	0	0	153		11150	S154_R	154	2015-07-07	0	0	154
770	S153	153	2012-02-09	0	0	153		11151	S154_R	154	2015-07-08	0	0	154
771	S153	153	2012-02-10	0	0	153		11152	S154_R	154	2015-07-09	0	0	154
772	S153	153	2012-02-11	0.08	0.203	153		11153	S154_R	154	2015-07-10	0	0	154
773	S153	153	2012-02-12	0	0	153		11154	S154_R	154	2015-07-11	0	0	154
774	S153	153	2012-02-13	0	0	153		11155	S154_R	154	2015-07-12	0	0	154
775	S153	153	2012-02-14	0	0	153		11156	S154_R	154	2015-07-13	0	0	154
776	S153	153	2012-02-15	0	0	153		11157	S154_R	154	2015-07-14	0	0	154
777	S153	153	2012-02-16	0	0	153		11158	S154_R	154	2015-07-15	0.07	0.1778	154
778	S153	153	2012-02-17	0	0	153		11159	S154_R	154	2015-07-16	0	0	154
779	S153	153	2012-02-18	0	0	153		11160	S154_R	154	2015-07-17	0.83	2.1082	154
780	S153	153	2012-02-19	0	0	153		11161	S154_R	154	2015-07-18	0	0	154
781	S153	153	2012-02-20	0	0	153		11162	S154_R	154	2015-07-19	0.83	2.1082	154
782	S153	153	2012-02-21	0	0	153		11163	S154_R	154	2015-07-20	0	0	154
783	S153	153	2012-02-22	0	0	153		11164	S154_R	154	2015-07-21	0.06	0.1524	154
784	S153	153	2012-02-23	0	0	153		11165	S154_R	154	2015-07-22	0	0	154
785	S153	153	2012-02-24	0	0	153		11166	S154_R	154	2015-07-23	0.29	0.7366	154
786	S153	153	2012-02-25	0.05	0.127	153		11167	S154_R	154	2015-07-24	0.72	1.8288	154
787	S153	153	2012-02-26	0	0	153		11168	S154_R	154	2015-07-25	0.01	0.0254	154
788	S153	153	2012-02-27	0	0	153		11169	S154_R	154	2015-07-26	0.02	0.0508	154
789	S153	153	2012-02-28	0	0	153		11170	S154_R	154	2015-07-27	0.57	1.4478	154
790	S153	153	2012-02-29	0.01	0.025	153		11171	S154_R	154	2015-07-28	0	0	154
791	S153	153	2012-03-01	0.01	0.025	153		11172	S154_R	154	2015-07-29	0.53	1.3462	154
792	S153	153	2012-03-02	0	0	153		11173	S154_R	154	2015-07-30	0.09	0.2286	154
793	S153	153	2012-03-03	0	0	153		11174	S154_R	154	2015-07-31	0	0	154
794	S153	153	2012-03-04	0.22	0.559	153		11175	S154_R	154	2015-08-01	0.32	0.8128	154
795	S153	153	2012-03-05	0	0	153		11176	S154_R	154	2015-08-02	0.31	0.7874	154
796	S153	153	2012-03-06	0	0	153		11177	S154_R	154	2015-08-03	0.01	0.0254	154
797	S153	153	2012-03-07	0	0	153		11178	S154_R	154	2015-08-04	0	0	154
798	S153	153	2012-03-08	0.18	0.457	153		11179	S154_R	154	2015-08-05	0	0	154
799	S153	153	2012-03-09	0	0	153		11180	S154_R	154	2015-08-06	0	0	154
800	S153	153	2012-03-10	0.07	0.178	153		11181	S154_R	154	2015-08-07	0	0	154
801	S153	153	2012-03-11	0	0	153		11182	S154_R	154	2015-08-08	0.06	0.1524	154
802	S153	153	2012-03-12	0	0	153		11183	S154_R	154	2015-08-09	0.01	0.0254	154
803	S153	153	2012-03-13	0	0	153		11184	S154_R	154	2015-08-10	0.54	1.3716	154
804	S153	153	2012-03-14	0.02	0.051	153		11185	S154_R	154	2015-08-11	0.08	0.2032	154
805	S153	153	2012-03-15	0.02	0.051	153		11186	S154_R	154	2015-08-12	0.59	1.4986	154
806	S153	153	2012-03-16	0	0	153		11187	S154_R	154	2015-08-13	1.07	2.7178	154
807	S153	153	2012-03-17	0	0	153		11188	S154_R	154	2015-08-14	0.13	0.3302	154
808	S153	153	2012-03-18	0	0	153		11189	S154_R	154	2015-08-15	0.21	0.5334	154
809	S153	153	2012-03-19	0	0	153		11190	S154_R	154	2015-08-16	0.01	0.0254	154
810	S153	153	2012-03-20	0	0	153		11191	S154_R	154	2015-08-17	0	0	154
811	S153	153	2012-03-21	0	0	153		11192	S154_R	154	2015-08-18	0	0	154
812	S153	153	2012-03-22	0	0	153		11193	S154_R	154	2015-08-19	0.09	0.2286	154
813	S153	153	2012-03-23	0	0	153		11194	S154_R	154	2015-08-20	0	0	154
814	S153	153	2012-03-24	0	0	153		11195	S154_R	154	2015-08-21	0.01	0.0254	154
815	S153	153	2012-03-25	0	0	153		11196	S154_R	154	2015-08-22	0.01	0.0254	154
816	S153	153	2012-03-26	0	0	153		11197	S154_R	154	2015-08-23	0	0	154
817	S153	153	2012-03-27	0	0	153		11198	S154_R	154	2015-08-24	0.56	1.4224	154
818	S153	153	2012-03-28	0	0	153		11199	S154_R	154	2015-08-25	0.01	0.0254	154
819	S153	153	2012-03-29	0	0	153		11200	S154_R	154	2015-08-26	0.02	0.0508	154
820	S153	153	2012-03-30	0	0	153		11201	S154_R	154	2015-08-27	0.11	0.2794	154
821	S153	153	2012-03-31	0.04	0.102	153		11202	S154_R	154	2015-08-28	0.13	0.3302	154
822	S153	153	2012-04-01	0	0	153		11203	S154_R	154	2015-08-29	0.19	0.4826	154
823	S153	153	2012-04-02	0	0	153		11204	S154_R	154	2015-08-30	2.22	5.6388	154
824	S153	153	2012-04-03	0	0	153		11205	S154_R	154	2015-08-31	0	0	154
825	S153	153	2012-04-04	0	0	153		11206	S154_R	154	2015-09-01	0	0	154
826	S153	153	2012-04-05	0	0	153		11207	S154_R	154	2015-09-02	0	0	154
827	S153	153	2012-04-06	0	0	153		11208	S154_R	154	2015-09-03	0	0	154
828	S153	153	2012-04-07	0	0	153		11209	S154_R	154	2015-09-04	0.04	0.1016	154
829	S153	153	2012-04-08	0	0	153		11210	S154_R	154	2015-09-05	1	2.54	154
830	S153	153	2012-04-09	0	0	153		11211	S154_R	154	2015-09-06	0.51	1.2954	154
831	S153	153	2012-04-10	0	0	153		11212	S154_R	154	2015-09-07	0.08	0.2032	154
832	S153	153	2012-04-11	0	0	153		11213	S154_R	154	2015-09-08	0.01	0.0254	154
833	S153	153	2012-04-12	0	0	153		11214	S154_R	154	2015-09-09	0	0	154
834	S153	153	2012-04-13	0	0	153		11215	S154_R	154	2015-09-10	0	0	154
835	S153	153	2012-04-14	0	0	153		11216	S154_R	154	2015-09-11	0.19	0.4826	154
836	S153	153	2012-04-15	0	0	153		11217	S154_R	154	2015-09-12	0.22	0.5588	154
837	S153	153	2012-04-16	0	0	153		11218	S154_R	154	2015-09-13	0.25	0.635	154
838	S153	153	2012-04-17	0	0	153		11219	S154_R	154	2015-09-14	0.98	2.4892	154
839	S153	153	2012-04-18	0	0	153		11220	S154_R	154	2015-09-15	0.07	0.1778	154
840	S153	153	2012-04-19	0.34	0.864	153		11221	S154_R	154	2015-09-16	0.19	0.4826	154
841	S153	153	2012-04-20	1.47	3.734	153		11222	S154_R	154	2015-09-17	1.69	4.2926	154
842	S153	153	2012-04-21	0.1	0.254	153		11223	S154_R	154	2015-09-18	0	0	154
843	S153	153	2012-04-22	0.05	0.127	153		11224	S154_R	154	2015-09-19	0.01	0.0254	154
844	S153	153	2012-04-23	0	0	153		11225	S154_R	154	2015-09-20	0	0	154
845	S153	153	2012-04-24	0	0	153		11226	S154_R	154	2015-09-21	0	0	154
846	S153	153	2012-04-25	0	0	153		11227	S154_R	154	2015-09-22	0.01	0.0254	154
847	S153	153	2012-04-26	0	0	153		11228	S154_R	154	2015-09-23	0.02	0.0508	154
848	S153	153	2012-04-27	0	0	153		11229	S154_R	154	2015-09-24	0.01	0.0254	154
849	S153	153	2012-04-28	0	0	153		11230	S154_R	154	2015-09-25	0.64	1.6256	154
850	S153	153	2012-04-29	0.18	0.457	153		11231	S154_R	154	2015-09-26	0	0	154
851	S153	153	2012-04-30	0.09	0.229	153		11232	S154_R	154	2015-09-27	0	0	154
852	S153	153	2012-05-01	0.35	0.889	153		11233	S154_R	154	2015-09-28	0	0	154
853	S153	153	2012-05-02	0	0	153		11234	S154_R	154	2015-09-29	0.32	0.8128	154
854	S153	153	2012-05-03	0	0	153		11235	S154_R	154	2015-09-30	0.01	0.0254	154
855	S153	153	2012-05-04	0	0	153		11236	S154_R	154	2015-10-01	0	0	154
856	S153	153	2012-05-05	0	0	153		11237	S154_R	154	2015-10-02	0.06	0.1524	154
857	S153	153	2012-05-06	0	0	153		11238	S154_R	154	2015-10-03	0	0	154
858	S153	153	2012-05-07	0.28	0.711	153		11239	S154_R	154	2015-10-04	0.22	0.5588	154
859	S153	153	2012-05-08	0	0	153		11240	S154_R	154	2015-10-05	0.01	0.0254	154
860	S153	153	2012-05-09	0	0	153		11241	S154_R	154	2015-10-06	0	0	154
861	S153	153	2012-05-10	0.11	0.279	153		11242	S154_R	154	2015-10-07	0	0	154
862	S153	153	2012-05-11	0	0	153		11243	S154_R	154	2015-10-08	0	0	154
863	S153	153	2012-05-12	0	0	153		11244	S154_R	154	2015-10-09	0	0	154
864	S153	153	2012-05-13	0	0	153		11245	S154_R	154	2015-10-10	0.72	1.8288	154
865	S153	153	2012-05-14	0.01	0.025	153		11246	S154_R	154	2015-10-11	0.07	0.1778	154
866	S153	153	2012-05-15	1.19	3.023	153		11247	S154_R	154	2015-10-12	0	0	154
867	S153	153	2012-05-16	0	0	153		11248	S154_R	154	2015-10-13	0	0	154
868	S153	153	2012-05-17	0.76	1.93	153		11249	S154_R	154	2015-10-14	0.01	0.0254	154
869	S153	153	2012-05-18	0	0	153		11250	S154_R	154	2015-10-15	0	0	154
870	S153	153	2012-05-19	0.13	0.33	153		11251	S154_R	154	2015-10-16	0	0	154
871	S153	153	2012-05-20	0	0	153		11252	S154_R	154	2015-10-17	0	0	154
872	S153	153	2012-05-21	0	0	153		11253	S154_R	154	2015-10-18	0	0	154
873	S153	153	2012-05-22	0	0	153		11254	S154_R	154	2015-10-19	0	0	154
874	S153	153	2012-05-23	0	0	153		11255	S154_R	154	2015-10-20	0	0	154
875	S153	153	2012-05-24	0	0	153		11256	S154_R	154	2015-10-21	0.05	0.127	154
876	S153	153	2012-05-25	0	0	153		11257	S154_R	154	2015-10-22	0.01	0.0254	154
877	S153	153	2012-05-26	0	0	153		11258	S154_R	154	2015-10-23	0.09	0.2286	154
878	S153	153	2012-05-27	0	0	153		11259	S154_R	154	2015-10-24	0	0	154
879	S153	153	2012-05-28	0.02	0.051	153		11260	S154_R	154	2015-10-25	0.01	0.0254	154
880	S153	153	2012-05-29	0	0	153		11261	S154_R	154	2015-10-26	0	0	154
881	S153	153	2012-05-30	0	0	153		11262	S154_R	154	2015-10-27	0	0	154
882	S153	153	2012-05-31	0	0	153		11263	S154_R	154	2015-10-28	0.09	0.2286	154
883	S153	153	2012-06-01	0.1	0.254	153		11264	S154_R	154	2015-10-29	0	0	154
884	S153	153	2012-06-02	0	0	153		11265	S154_R	154	2015-10-30	0	0	154
885	S153	153	2012-06-03	0	0	153		11266	S154_R	154	2015-10-31	0	0	154
886	S153	153	2012-06-04	0	0	153		11267	S154_R	154	2015-11-01	0	0	154
887	S153	153	2012-06-05	0	0	153		11268	S154_R	154	2015-11-02	0	0	154
888	S153	153	2012-06-06	0.07	0.178	153		11269	S154_R	154	2015-11-03	0	0	154
889	S153	153	2012-06-07	0	0	153		11270	S154_R	154	2015-11-04	0	0	154
890	S153	153	2012-06-08	0.11	0.279	153		11271	S154_R	154	2015-11-05	0	0	154
891	S153	153	2012-06-09	0.34	0.864	153		11272	S154_R	154	2015-11-06	0	0	154
892	S153	153	2012-06-10	0.01	0.025	153		11273	S154_R	154	2015-11-07	0	0	154
893	S153	153	2012-06-11	0	0	153		11274	S154_R	154	2015-11-08	0	0	154
894	S153	153	2012-06-12	0	0	153		11275	S154_R	154	2015-11-09	0.02	0.0508	154
895	S153	153	2012-06-13	0.38	0.965	153		11276	S154_R	154	2015-11-10	0.12	0.3048	154
896	S153	153	2012-06-14	0	0	153		11277	S154_R	154	2015-11-11	0.01	0.0254	154
897	S153	153	2012-06-15	0.02	0.051	153		11278	S154_R	154	2015-11-12	0	0	154
898	S153	153	2012-06-16	0	0	153		11279	S154_R	154	2015-11-13	0.03	0.0762	154
899	S153	153	2012-06-17	0	0	153		11280	S154_R	154	2015-11-14	0	0	154
900	S153	153	2012-06-18	0	0	153		11281	S154_R	154	2015-11-15	0	0	154
901	S153	153	2012-06-19	0	0	153		11282	S154_R	154	2015-11-16	0	0	154
902	S153	153	2012-06-20	0.28	0.711	153		11283	S154_R	154	2015-11-17	0	0	154
903	S153	153	2012-06-21	0.01	0.025	153		11284	S154_R	154	2015-11-18	0.15	0.381	154
904	S153	153	2012-06-22	0.4	1.016	153		11285	S154_R	154	2015-11-19	1.87	4.7498	154
905	S153	153	2012-06-23	0.06	0.152	153		11286	S154_R	154	2015-11-20	0	0	154
906	S153	153	2012-06-24	0.09	0.229	153		11287	S154_R	154	2015-11-21	1.43	3.6322	154
907	S153	153	2012-06-25	0	0	153		11288	S154_R	154	2015-11-22	0.68	1.7272	154
908	S153	153	2012-06-26	0	0	153		11289	S154_R	154	2015-11-23	0	0	154
909	S153	153	2012-06-27	0.47	1.194	153		11290	S154_R	154	2015-11-24	0	0	154
910	S153	153	2012-06-28	0	0	153		11291	S154_R	154	2015-11-25	0.01	0.0254	154
911	S153	153	2012-06-29	0	0	153		11292	S154_R	154	2015-11-26	0.04	0.1016	154
912	S153	153	2012-06-30	0	0	153		11293	S154_R	154	2015-11-27	0.01	0.0254	154
913	S153	153	2012-07-01	0	0	153		11294	S154_R	154	2015-11-28	0.04	0.1016	154
914	S153	153	2012-07-02	0	0	153		11295	S154_R	154	2015-11-29	0.01	0.0254	154
915	S153	153	2012-07-03	0	0	153		11296	S154_R	154	2015-11-30	0.01	0.0254	154
916	S153	153	2012-07-04	0	0	153		13530	S386B_R	386	2015-06-01	0	0	386
917	S153	153	2012-07-05	0.29	0.737	153		13531	S386B_R	386	2015-06-02	0.03	0.0762	386
918	S153	153	2012-07-06	0	0	153		13532	S386B_R	386	2015-06-03	0.2	0.508	386
919	S153	153	2012-07-07	0	0	153		13533	S386B_R	386	2015-06-04	0	0	386
920	S153	153	2012-07-08	0	0	153		13534	S386B_R	386	2015-06-05	0	0	386
921	S153	153	2012-07-09	0	0	153		13535	S386B_R	386	2015-06-06	0.56	1.4224	386
922	S153	153	2012-07-10	0.01	0.025	153		13536	S386B_R	386	2015-06-07	0	0	386
923	S153	153	2012-07-11	0.01	0.025	153		13537	S386B_R	386	2015-06-08	1.09	2.7686	386
924	S153	153	2012-07-12	0	0	153		13538	S386B_R	386	2015-06-09	0.14	0.3556	386
925	S153	153	2012-07-13	0.02	0.051	153		13539	S386B_R	386	2015-06-10	2.24	5.6896	386
926	S153	153	2012-07-14	0	0	153		13540	S386B_R	386	2015-06-11	0.2	0.508	386
927	S153	153	2012-07-15	1.01	2.565	153		13541	S386B_R	386	2015-06-12	0	0	386
928	S153	153	2012-07-16	0.06	0.152	153		13542	S386B_R	386	2015-06-13	0	0	386
929	S153	153	2012-07-17	0	0	153		13543	S386B_R	386	2015-06-14	0	0	386
930	S153	153	2012-07-18	0	0	153		13544	S386B_R	386	2015-06-15	0	0	386
931	S153	153	2012-07-19	0	0	153		13545	S386B_R	386	2015-06-16	0.04	0.1016	386
932	S153	153	2012-07-20	0	0	153		13546	S386B_R	386	2015-06-17	0	0	386
933	S153	153	2012-07-21	0	0	153		13547	S386B_R	386	2015-06-18	0	0	386
934	S153	153	2012-07-22	0.25	0.635	153		13548	S386B_R	386	2015-06-19	0	0	386
935	S153	153	2012-07-23	0.03	0.076	153		13549	S386B_R	386	2015-06-20	0.27	0.6858	386
936	S153	153	2012-07-24	0	0	153		13550	S386B_R	386	2015-06-21	0	0	386
937	S153	153	2012-07-25	0	0	153		13551	S386B_R	386	2015-06-22	0	0	386
938	S153	153	2012-07-26	0	0	153		13552	S386B_R	386	2015-06-23	0	0	386
939	S153	153	2012-07-27	0.37	0.94	153		13553	S386B_R	386	2015-06-24	0	0	386
940	S153	153	2012-07-28	0	0	153		13554	S386B_R	386	2015-06-25	0.8	2.032	386
941	S153	153	2012-07-29	0	0	153		13555	S386B_R	386	2015-06-26	0.11	0.2794	386
942	S153	153	2012-07-30	0	0	153		13556	S386B_R	386	2015-06-27	0.01	0.0254	386
943	S153	153	2012-07-31	0.01	0.025	153		13557	S386B_R	386	2015-06-28	0.01	0.0254	386
944	S153	153	2012-08-01	0	0	153		13558	S386B_R	386	2015-06-29	0.05	0.127	386
945	S153	153	2012-08-02	0	0	153		13559	S386B_R	386	2015-06-30	1.1	2.794	386
946	S153	153	2012-08-03	0.67	1.702	153		13560	S386B_R	386	2015-07-01	0.06	0.1524	386
947	S153	153	2012-08-04	0	0	153		13561	S386B_R	386	2015-07-02	0	0	386
948	S153	153	2012-08-05	0	0	153		13562	S386B_R	386	2015-07-03	0.03	0.0762	386
949	S153	153	2012-08-06	0.04	0.102	153		13563	S386B_R	386	2015-07-04	0.22	0.5588	386
950	S153	153	2012-08-07	0	0	153		13564	S386B_R	386	2015-07-05	0.73	1.8542	386
951	S153	153	2012-08-08	0.06	0.152	153		13565	S386B_R	386	2015-07-06	0.01	0.0254	386
952	S153	153	2012-08-09	0	0	153		13566	S386B_R	386	2015-07-07	1.39	3.5306	386
953	S153	153	2012-08-10	0.09	0.229	153		13567	S386B_R	386	2015-07-08	0.01	0.0254	386
954	S153	153	2012-08-11	0	0	153		13568	S386B_R	386	2015-07-09	0	0	386
955	S153	153	2012-08-12	0.05	0.127	153		13569	S386B_R	386	2015-07-10	0	0	386
956	S153	153	2012-08-13	0.01	0.025	153		13570	S386B_R	386	2015-07-11	0	0	386
957	S153	153	2012-08-14	0	0	153		13571	S386B_R	386	2015-07-12	0	0	386
958	S153	153	2012-08-15	0	0	153		13572	S386B_R	386	2015-07-13	0	0	386
959	S153	153	2012-08-16	0	0	153		13573	S386B_R	386	2015-07-14	0	0	386
960	S153	153	2012-08-17	0	0	153		13574	S386B_R	386	2015-07-15	0.07	0.1778	386
961	S153	153	2012-08-18	0.06	0.152	153		13575	S386B_R	386	2015-07-16	0.02	0.0508	386
962	S153	153	2012-08-19	0.01	0.025	153		13576	S386B_R	386	2015-07-17	0.06	0.1524	386
963	S153	153	2012-08-20	0.05	0.127	153		13577	S386B_R	386	2015-07-18	0	0	386
964	S153	153	2012-08-21	0.37	0.94	153		13578	S386B_R	386	2015-07-19	0	0	386
965	S153	153	2012-08-22	0.04	0.102	153		13579	S386B_R	386	2015-07-20	0	0	386
966	S153	153	2012-08-23	0	0	153		13580	S386B_R	386	2015-07-21	0.37	0.9398	386
967	S153	153	2012-08-24	0.08	0.203	153		13581	S386B_R	386	2015-07-22	0.21	0.5334	386
968	S153	153	2012-08-25	0.01	0.025	153		13582	S386B_R	386	2015-07-23	0.01	0.0254	386
969	S153	153	2012-08-26	5.65	14.351	153		13583	S386B_R	386	2015-07-24	1.21	3.0734	386
970	S153	153	2012-08-27	3.07	7.798	153		13584	S386B_R	386	2015-07-25	1.07	2.7178	386
971	S153	153	2012-08-28	1.11	2.819	153		13585	S386B_R	386	2015-07-26	0.09	0.2286	386
972	S153	153	2012-08-29	0	0	153		13586	S386B_R	386	2015-07-27	0.09	0.2286	386
973	S153	153	2012-08-30	0.54	1.372	153		13587	S386B_R	386	2015-07-28	0	0	386
974	S153	153	2012-08-31	0	0	153		13588	S386B_R	386	2015-07-29	0.54	1.3716	386
975	S153	153	2012-09-01	0	0	153		13589	S386B_R	386	2015-07-30	0.13	0.3302	386
976	S153	153	2012-09-02	0	0	153		13590	S386B_R	386	2015-07-31	0	0	386
977	S153	153	2012-09-03	0.49	1.245	153		13591	S386B_R	386	2015-08-01	0.7	1.778	386
978	S153	153	2012-09-04	0.38	0.965	153		13592	S386B_R	386	2015-08-02	0.2	0.508	386
979	S153	153	2012-09-05	0.01	0.025	153		13593	S386B_R	386	2015-08-03	0	0	386
980	S153	153	2012-09-06	0	0	153		13594	S386B_R	386	2015-08-04	0	0	386
981	S153	153	2012-09-07	0	0	153		13595	S386B_R	386	2015-08-05	0	0	386
982	S153	153	2012-09-08	0	0	153		13596	S386B_R	386	2015-08-06	0	0	386
983	S153	153	2012-09-09	0	0	153		13597	S386B_R	386	2015-08-07	0	0	386
984	S153	153	2012-09-10	0	0	153		13598	S386B_R	386	2015-08-08	0.16	0.4064	386
985	S153	153	2012-09-11	0	0	153		13599	S386B_R	386	2015-08-09	0	0	386
986	S153	153	2012-09-12	0	0	153		13600	S386B_R	386	2015-08-10	0	0	386
987	S153	153	2012-09-13	0.05	0.127	153		13601	S386B_R	386	2015-08-11	0	0	386
988	S153	153	2012-09-14	0	0	153		13602	S386B_R	386	2015-08-12	0.24	0.6096	386
989	S153	153	2012-09-15	0.08	0.203	153		13603	S386B_R	386	2015-08-13	0.3	0.762	386
990	S153	153	2012-09-16	0	0	153		13604	S386B_R	386	2015-08-14	0	0	386
991	S153	153	2012-09-17	0.22	0.559	153		13605	S386B_R	386	2015-08-15	0.01	0.0254	386
992	S153	153	2012-09-18	0.37	0.94	153		13606	S386B_R	386	2015-08-16	0.1	0.254	386
993	S153	153	2012-09-19	0.01	0.025	153		13607	S386B_R	386	2015-08-17	0.11	0.2794	386
994	S153	153	2012-09-20	0	0	153		13608	S386B_R	386	2015-08-18	0.04	0.1016	386
995	S153	153	2012-09-21	0.15	0.381	153		13609	S386B_R	386	2015-08-19	0	0	386
996	S153	153	2012-09-22	0	0	153		13610	S386B_R	386	2015-08-20	0	0	386
997	S153	153	2012-09-23	0	0	153		13611	S386B_R	386	2015-08-21	0.03	0.0762	386
998	S153	153	2012-09-24	0	0	153		13612	S386B_R	386	2015-08-22	0.04	0.1016	386
999	S153	153	2012-09-25	0	0	153		13613	S386B_R	386	2015-08-23	0.01	0.0254	386
1000	S153	153	2012-09-26	0	0	153		13614	S386B_R	386	2015-08-24	0.28	0.7112	386
1001	S153	153	2012-09-27	0.13	0.33	153		13615	S386B_R	386	2015-08-25	0.01	0.0254	386
1002	S153	153	2012-09-28	0	0	153		13616	S386B_R	386	2015-08-26	0	0	386
1003	S153	153	2012-09-29	0	0	153		13617	S386B_R	386	2015-08-27	0.01	0.0254	386
1004	S153	153	2012-09-30	0	0	153		13618	S386B_R	386	2015-08-28	1.79	4.5466	386
1005	S153	153	2012-10-01	0.11	0.279	153		13619	S386B_R	386	2015-08-29	0.44	1.1176	386
1006	S153	153	2012-10-02	0.3	0.762	153		13620	S386B_R	386	2015-08-30	1.79	4.5466	386
1007	S153	153	2012-10-03	0	0	153		13621	S386B_R	386	2015-08-31	0.03	0.0762	386
1008	S153	153	2012-10-04	0.01	0.025	153		13622	S386B_R	386	2015-09-01	0.01	0.0254	386
1009	S153	153	2012-10-05	0.01	0.025	153		13623	S386B_R	386	2015-09-02	0	0	386
1010	S153	153	2012-10-06	0.14	0.356	153		13624	S386B_R	386	2015-09-03	0	0	386
1011	S153	153	2012-10-07	0.21	0.533	153		13625	S386B_R	386	2015-09-04	0	0	386
1012	S153	153	2012-10-08	0	0	153		13626	S386B_R	386	2015-09-05	1.76	4.4704	386
1013	S153	153	2012-10-09	0	0	153		13627	S386B_R	386	2015-09-06	0.46	1.1684	386
1014	S153	153	2012-10-10	0	0	153		13628	S386B_R	386	2015-09-07	0.01	0.0254	386
1015	S153	153	2012-10-11	0	0	153		13629	S386B_R	386	2015-09-08	0	0	386
1016	S153	153	2012-10-12	0	0	153		13630	S386B_R	386	2015-09-09	0	0	386
1017	S153	153	2012-10-13	0.01	0.025	153		13631	S386B_R	386	2015-09-10	0.13	0.3302	386
1018	S153	153	2012-10-14	0.42	1.067	153		13632	S386B_R	386	2015-09-11	0.66	1.6764	386
1019	S153	153	2012-10-15	0.18	0.457	153		13633	S386B_R	386	2015-09-12	0.09	0.2286	386
1020	S153	153	2012-10-16	0	0	153		13634	S386B_R	386	2015-09-13	0.3	0.762	386
1021	S153	153	2012-10-17	1.44	3.658	153		13635	S386B_R	386	2015-09-14	1.69	4.2926	386
1022	S153	153	2012-10-18	0	0	153		13636	S386B_R	386	2015-09-15	0.46	1.1684	386
1023	S153	153	2012-10-19	0	0	153		13637	S386B_R	386	2015-09-16	0.48	1.2192	386
1024	S153	153	2012-10-20	0	0	153		13638	S386B_R	386	2015-09-17	1.44	3.6576	386
1025	S153	153	2012-10-21	0	0	153		13639	S386B_R	386	2015-09-18	0.01	0.0254	386
1026	S153	153	2012-10-22	0	0	153		13640	S386B_R	386	2015-09-19	0.01	0.0254	386
1027	S153	153	2012-10-23	0	0	153		13641	S386B_R	386	2015-09-20	0	0	386
1028	S153	153	2012-10-24	0.01	0.025	153		13642	S386B_R	386	2015-09-21	0	0	386
1029	S153	153	2012-10-25	0.2	0.508	153		13643	S386B_R	386	2015-09-22	0.01	0.0254	386
1030	S153	153	2012-10-26	0.38	0.965	153		13644	S386B_R	386	2015-09-23	0.09	0.2286	386
1031	S153	153	2012-10-27	0	0	153		13645	S386B_R	386	2015-09-24	0.01	0.0254	386
1032	S153	153	2012-10-28	0	0	153		13646	S386B_R	386	2015-09-25	0.05	0.127	386
1033	S153	153	2012-10-29	0	0	153		13647	S386B_R	386	2015-09-26	0.09	0.2286	386
1034	S153	153	2012-10-30	0	0	153		13648	S386B_R	386	2015-09-27	0.99	2.5146	386
1035	S153	153	2012-10-31	0	0	153		13649	S386B_R	386	2015-09-28	0	0	386
1036	S153	153	2012-11-01	0	0	153		13650	S386B_R	386	2015-09-29	0.37	0.9398	386
1037	S153	153	2012-11-02	0	0	153		13651	S386B_R	386	2015-09-30	0	0	386
1038	S153	153	2012-11-03	0	0	153		13652	S386B_R	386	2015-10-01	0	0	386
1039	S153	153	2012-11-04	0	0	153		13653	S386B_R	386	2015-10-02	0	0	386
1040	S153	153	2012-11-05	0	0	153		13654	S386B_R	386	2015-10-03	0	0	386
1041	S153	153	2012-11-06	0	0	153		13655	S386B_R	386	2015-10-04	0.31	0.7874	386
1042	S153	153	2012-11-07	0	0	153		13656	S386B_R	386	2015-10-05	0	0	386
1043	S153	153	2012-11-08	0	0	153		13657	S386B_R	386	2015-10-06	0	0	386
1044	S153	153	2012-11-09	0	0	153		13658	S386B_R	386	2015-10-07	0	0	386
1045	S153	153	2012-11-10	0	0	153		13659	S386B_R	386	2015-10-08	0	0	386
1046	S153	153	2012-11-11	0	0	153		13660	S386B_R	386	2015-10-09	0.33	0.8382	386
1047	S153	153	2012-11-12	0	0	153		13661	S386B_R	386	2015-10-10	0.26	0.6604	386
1048	S153	153	2012-11-13	0	0	153		13662	S386B_R	386	2015-10-11	0.06	0.1524	386
1049	S153	153	2012-11-14	0.02	0.051	153		13663	S386B_R	386	2015-10-12	0	0	386
1050	S153	153	2012-11-15	0	0	153		13664	S386B_R	386	2015-10-13	0	0	386
1051	S153	153	2012-11-16	0	0	153		13665	S386B_R	386	2015-10-14	0	0	386
1052	S153	153	2012-11-17	0	0	153		13666	S386B_R	386	2015-10-15	0	0	386
1053	S153	153	2012-11-18	0	0	153		13667	S386B_R	386	2015-10-16	0	0	386
1054	S153	153	2012-11-19	0	0	153		13668	S386B_R	386	2015-10-17	0	0	386
1055	S153	153	2012-11-20	0	0	153		13669	S386B_R	386	2015-10-18	0	0	386
1056	S153	153	2012-11-21	0	0	153		13670	S386B_R	386	2015-10-19	0	0	386
1057	S153	153	2012-11-22	0	0	153		13671	S386B_R	386	2015-10-20	0	0	386
1058	S153	153	2012-11-23	0	0	153		13672	S386B_R	386	2015-10-21	0	0	386
1059	S153	153	2012-11-24	0	0	153		13673	S386B_R	386	2015-10-22	0	0	386
1060	S153	153	2012-11-25	0	0	153		13674	S386B_R	386	2015-10-23	0.08	0.2032	386
1061	S153	153	2012-11-26	0	0	153		13675	S386B_R	386	2015-10-24	0	0	386
1062	S153	153	2012-11-27	0.16	0.406	153		13676	S386B_R	386	2015-10-25	0	0	386
1063	S153	153	2012-11-28	0	0	153		13677	S386B_R	386	2015-10-26	0.01	0.0254	386
1064	S153	153	2012-11-29	0	0	153		13678	S386B_R	386	2015-10-27	0	0	386
1065	S153	153	2012-11-30	0	0	153		13679	S386B_R	386	2015-10-28	0	0	386
1066	S153	153	2012-12-01	0	0	153		13680	S386B_R	386	2015-10-29	0	0	386
1067	S153	153	2012-12-02	0.04	0.102	153		13681	S386B_R	386	2015-10-30	0	0	386
1068	S153	153	2012-12-03	0	0	153		13682	S386B_R	386	2015-10-31	0	0	386
1069	S153	153	2012-12-04	0	0	153		13683	S386B_R	386	2015-11-01	0	0	386
1070	S153	153	2012-12-05	0	0	153		13684	S386B_R	386	2015-11-02	0	0	386
1071	S153	153	2012-12-06	0	0	153		13685	S386B_R	386	2015-11-03	0	0	386
1072	S153	153	2012-12-07	0	0	153		13686	S386B_R	386	2015-11-04	0	0	386
1073	S153	153	2012-12-08	0.16	0.406	153		13687	S386B_R	386	2015-11-05	0	0	386
1074	S153	153	2012-12-09	0.33	0.838	153		13688	S386B_R	386	2015-11-06	0.01	0.0254	386
1075	S153	153	2012-12-10	0.03	0.076	153		13689	S386B_R	386	2015-11-07	0	0	386
1076	S153	153	2012-12-11	0.39	0.991	153		13690	S386B_R	386	2015-11-08	0	0	386
1077	S153	153	2012-12-12	0.01	0.025	153		13691	S386B_R	386	2015-11-09	0	0	386
1078	S153	153	2012-12-13	0	0	153		13692	S386B_R	386	2015-11-10	0.35	0.889	386
1079	S153	153	2012-12-14	0	0	153		13693	S386B_R	386	2015-11-11	0.01	0.0254	386
1080	S153	153	2012-12-15	0.02	0.051	153		13694	S386B_R	386	2015-11-12	0	0	386
1081	S153	153	2012-12-16	0	0	153		13695	S386B_R	386	2015-11-13	0.43	1.0922	386
1082	S153	153	2012-12-17	0.01	0.025	153		13696	S386B_R	386	2015-11-14	0	0	386
1083	S153	153	2012-12-18	0	0	153		13697	S386B_R	386	2015-11-15	0	0	386
1084	S153	153	2012-12-19	0	0	153		13698	S386B_R	386	2015-11-16	0	0	386
1085	S153	153	2012-12-20	0	0	153		13699	S386B_R	386	2015-11-17	0.02	0.0508	386
1086	S153	153	2012-12-21	0	0	153		13700	S386B_R	386	2015-11-18	0.12	0.3048	386
1087	S153	153	2012-12-22	0	0	153		13701	S386B_R	386	2015-11-19	0.17	0.4318	386
1088	S153	153	2012-12-23	0	0	153		13702	S386B_R	386	2015-11-20	0.01	0.0254	386
1089	S153	153	2012-12-24	0	0	153		13703	S386B_R	386	2015-11-21	0.27	0.6858	386
1090	S153	153	2012-12-25	0	0	153		13704	S386B_R	386	2015-11-22	1.63	4.1402	386
1091	S153	153	2012-12-26	0	0	153		13705	S386B_R	386	2015-11-23	0	0	386
1092	S153	153	2012-12-27	0	0	153		13706	S386B_R	386	2015-11-24	0	0	386
1093	S153	153	2012-12-28	0	0	153		13707	S386B_R	386	2015-11-25	0.05	0.127	386
1094	S153	153	2012-12-29	0	0	153		13708	S386B_R	386	2015-11-26	0.06	0.1524	386
1095	S153	153	2012-12-30	0	0	153		13709	S386B_R	386	2015-11-27	0.05	0.127	386
1096	S153	153	2012-12-31	0	0	153		13710	S386B_R	386	2015-11-28	0.01	0.0254	386
1097	S153	153	2013-01-01	0	0	153		13711	S386B_R	386	2015-11-29	0	0	386
1098	S153	153	2013-01-02	0	0	153		13712	S386B_R	386	2015-11-30	0	0	386
1099	S153	153	2013-01-03	0	0	153		16014	S70_R	70	2015-06-01	0.7	1.778	70
1100	S153	153	2013-01-04	0	0	153		16015	S70_R	70	2015-06-02	0.03	0.0762	70
1101	S153	153	2013-01-05	0.1	0.254	153		16016	S70_R	70	2015-06-03	0.43	1.0922	70
1102	S153	153	2013-01-06	0.12	0.305	153		16017	S70_R	70	2015-06-04	0	0	70
1103	S153	153	2013-01-07	0.23	0.584	153		16018	S70_R	70	2015-06-05	0	0	70
1104	S153	153	2013-01-08	0	0	153		16019	S70_R	70	2015-06-06	0	0	70
1105	S153	153	2013-01-09	0	0	153		16020	S70_R	70	2015-06-07	0.52	1.3208	70
1106	S153	153	2013-01-10	0	0	153		16021	S70_R	70	2015-06-08	0	0	70
1107	S153	153	2013-01-11	0.04	0.102	153		16022	S70_R	70	2015-06-09	0	0	70
1108	S153	153	2013-01-12	0	0	153		16023	S70_R	70	2015-06-10	0.48	1.2192	70
1109	S153	153	2013-01-13	0	0	153		16024	S70_R	70	2015-06-11	2.04	5.1816	70
1110	S153	153	2013-01-14	0	0	153		16025	S70_R	70	2015-06-12	0.13	0.3302	70
1111	S153	153	2013-01-15	0	0	153		16026	S70_R	70	2015-06-13	0	0	70
1112	S153	153	2013-01-16	0	0	153		16027	S70_R	70	2015-06-14	0	0	70
1113	S153	153	2013-01-17	0	0	153		16028	S70_R	70	2015-06-15	0	0	70
1114	S153	153	2013-01-18	0	0	153		16029	S70_R	70	2015-06-16	0	0	70
1115	S153	153	2013-01-19	0.04	0.102	153		16030	S70_R	70	2015-06-17	0.21	0.5334	70
1116	S153	153	2013-01-20	0.01	0.025	153		16031	S70_R	70	2015-06-18	0	0	70
1117	S153	153	2013-01-21	0	0	153		16032	S70_R	70	2015-06-19	0	0	70
1118	S153	153	2013-01-22	0	0	153		16033	S70_R	70	2015-06-20	0	0	70
1119	S153	153	2013-01-23	0	0	153		16034	S70_R	70	2015-06-21	0	0	70
1120	S153	153	2013-01-24	0	0	153		16035	S70_R	70	2015-06-22	0	0	70
1121	S153	153	2013-01-25	0	0	153		16036	S70_R	70	2015-06-23	0	0	70
1122	S153	153	2013-01-26	0	0	153		16037	S70_R	70	2015-06-24	0.04	0.1016	70
1123	S153	153	2013-01-27	0	0	153		16038	S70_R	70	2015-06-25	0	0	70
1124	S153	153	2013-01-28	0	0	153		16039	S70_R	70	2015-06-26	0.04	0.1016	70
1125	S153	153	2013-01-29	0	0	153		16040	S70_R	70	2015-06-27	0.01	0.0254	70
1126	S153	153	2013-01-30	0	0	153		16041	S70_R	70	2015-06-28	0	0	70
1127	S153	153	2013-01-31	0.01	0.025	153		16042	S70_R	70	2015-06-29	0	0	70
1128	S153	153	2013-02-01	0	0	153		16043	S70_R	70	2015-06-30	0.62	1.5748	70
1129	S153	153	2013-02-02	0	0	153		16044	S70_R	70	2015-07-01	1.28	3.2512	70
1130	S153	153	2013-02-03	0	0	153		16045	S70_R	70	2015-07-02	0	0	70
1131	S153	153	2013-02-04	0	0	153		16046	S70_R	70	2015-07-03	0	0	70
1132	S153	153	2013-02-05	0	0	153		16047	S70_R	70	2015-07-04	0	0	70
1133	S153	153	2013-02-06	0	0	153		16048	S70_R	70	2015-07-05	0	0	70
1134	S153	153	2013-02-07	0	0	153		16049	S70_R	70	2015-07-06	0.82	2.0828	70
1135	S153	153	2013-02-08	0	0	153		16050	S70_R	70	2015-07-07	0	0	70
1136	S153	153	2013-02-09	0	0	153		16051	S70_R	70	2015-07-08	0.32	0.8128	70
1137	S153	153	2013-02-10	0	0	153		16052	S70_R	70	2015-07-09	0	0	70
1138	S153	153	2013-02-11	0.01	0.025	153		16053	S70_R	70	2015-07-10	0.25	0.635	70
1139	S153	153	2013-02-12	0	0	153		16054	S70_R	70	2015-07-11	0	0	70
1140	S153	153	2013-02-13	0	0	153		16055	S70_R	70	2015-07-12	0	0	70
1141	S153	153	2013-02-14	2.73	6.934	153		16056	S70_R	70	2015-07-13	0	0	70
1142	S153	153	2013-02-15	0.04	0.102	153		16057	S70_R	70	2015-07-14	0.06	0.1524	70
1143	S153	153	2013-02-16	0	0	153		16058	S70_R	70	2015-07-15	0.01	0.0254	70
1144	S153	153	2013-02-17	0	0	153		16059	S70_R	70	2015-07-16	0.26	0.6604	70
1145	S153	153	2013-02-18	0	0	153		16060	S70_R	70	2015-07-17	0.58	1.4732	70
1146	S153	153	2013-02-19	0	0	153		16061	S70_R	70	2015-07-18	0.01	0.0254	70
1147	S153	153	2013-02-20	0	0	153		16062	S70_R	70	2015-07-19	0	0	70
1148	S153	153	2013-02-21	0	0	153		16063	S70_R	70	2015-07-20	0.03	0.0762	70
1149	S153	153	2013-02-22	0	0	153		16064	S70_R	70	2015-07-21	0.06	0.1524	70
1150	S153	153	2013-02-23	0.06	0.152	153		16065	S70_R	70	2015-07-22	0	0	70
1151	S153	153	2013-02-24	0	0	153		16066	S70_R	70	2015-07-23	0	0	70
1152	S153	153	2013-02-25	0	0	153		16067	S70_R	70	2015-07-24	0.02	0.0508	70
1153	S153	153	2013-02-26	0	0	153		16068	S70_R	70	2015-07-25	0.41	1.0414	70
1154	S153	153	2013-02-27	0.19	0.483	153		16069	S70_R	70	2015-07-26	0	0	70
1155	S153	153	2013-02-28	0	0	153		16070	S70_R	70	2015-07-27	0.02	0.0508	70
1156	S153	153	2013-03-01	0	0	153		16071	S70_R	70	2015-07-28	0.07	0.1778	70
1157	S153	153	2013-03-02	0	0	153		16072	S70_R	70	2015-07-29	0	0	70
1158	S153	153	2013-03-03	0	0	153		16073	S70_R	70	2015-07-30	0.35	0.889	70
1159	S153	153	2013-03-04	0	0	153		16074	S70_R	70	2015-07-31	0.61	1.5494	70
1160	S153	153	2013-03-05	0	0	153		16075	S70_R	70	2015-08-01	0.04	0.1016	70
1161	S153	153	2013-03-06	0	0	153		16076	S70_R	70	2015-08-02	0.29	0.7366	70
1162	S153	153	2013-03-07	0	0	153		16077	S70_R	70	2015-08-03	0.16	0.4064	70
1163	S153	153	2013-03-08	0	0	153		16078	S70_R	70	2015-08-04	0	0	70
1164	S153	153	2013-03-09	0	0	153		16079	S70_R	70	2015-08-05	0	0	70
1165	S153	153	2013-03-10	0	0	153		16080	S70_R	70	2015-08-06	0	0	70
1166	S153	153	2013-03-11	0	0	153		16081	S70_R	70	2015-08-07	0	0	70
1167	S153	153	2013-03-12	0	0	153		16082	S70_R	70	2015-08-08	0	0	70
1168	S153	153	2013-03-13	0	0	153		16083	S70_R	70	2015-08-09	0.06	0.1524	70
1169	S153	153	2013-03-14	0	0	153		16084	S70_R	70	2015-08-10	0.01	0.0254	70
1170	S153	153	2013-03-15	0	0	153		16085	S70_R	70	2015-08-11	0	0	70
1171	S153	153	2013-03-16	0	0	153		16086	S70_R	70	2015-08-12	0	0	70
1172	S153	153	2013-03-17	0	0	153		16087	S70_R	70	2015-08-13	0.04	0.1016	70
1173	S153	153	2013-03-18	0.39	0.991	153		16088	S70_R	70	2015-08-14	1.67	4.2418	70
1174	S153	153	2013-03-19	0	0	153		16089	S70_R	70	2015-08-15	0.23	0.5842	70
1175	S153	153	2013-03-20	0.02	0.051	153		16090	S70_R	70	2015-08-16	0.63	1.6002	70
1176	S153	153	2013-03-21	0	0	153		16091	S70_R	70	2015-08-17	0	0	70
1177	S153	153	2013-03-22	0.01	0.025	153		16092	S70_R	70	2015-08-18	0	0	70
1178	S153	153	2013-03-23	0	0	153		16093	S70_R	70	2015-08-19	0	0	70
1179	S153	153	2013-03-24	0.34	0.864	153		16094	S70_R	70	2015-08-20	0.02	0.0508	70
1180	S153	153	2013-03-25	0	0	153		16095	S70_R	70	2015-08-21	0	0	70
1181	S153	153	2013-03-26	0	0	153		16096	S70_R	70	2015-08-22	0	0	70
1182	S153	153	2013-03-27	0	0	153		16097	S70_R	70	2015-08-23	0	0	70
1183	S153	153	2013-03-28	0	0	153		16098	S70_R	70	2015-08-24	0	0	70
1184	S153	153	2013-03-29	0	0	153		16099	S70_R	70	2015-08-25	0	0	70
1185	S153	153	2013-03-30	0	0	153		16100	S70_R	70	2015-08-26	0.15	0.381	70
1186	S153	153	2013-03-31	0	0	153		16101	S70_R	70	2015-08-27	0.47	1.1938	70
1187	S153	153	2013-04-01	0	0	153		16102	S70_R	70	2015-08-28	0.42	1.0668	70
1188	S153	153	2013-04-02	0	0	153		16103	S70_R	70	2015-08-29	0.67	1.7018	70
1189	S153	153	2013-04-03	0	0	153		16104	S70_R	70	2015-08-30	0.17	0.4318	70
1190	S153	153	2013-04-04	0.31	0.787	153		16105	S70_R	70	2015-08-31	0.26	0.6604	70
1191	S153	153	2013-04-05	0.13	0.33	153		16106	S70_R	70	2015-09-01	0.57	1.4478	70
1192	S153	153	2013-04-06	0	0	153		16107	S70_R	70	2015-09-02	0	0	70
1193	S153	153	2013-04-07	0	0	153		16108	S70_R	70	2015-09-03	0	0	70
1194	S153	153	2013-04-08	0	0	153		16109	S70_R	70	2015-09-04	0.24	0.6096	70
1195	S153	153	2013-04-09	0	0	153		16110	S70_R	70	2015-09-05	0.28	0.7112	70
1196	S153	153	2013-04-10	0	0	153		16111	S70_R	70	2015-09-06	0.37	0.9398	70
1197	S153	153	2013-04-11	0	0	153		16112	S70_R	70	2015-09-07	0.84	2.1336	70
1198	S153	153	2013-04-12	0	0	153		16113	S70_R	70	2015-09-08	0.06	0.1524	70
1199	S153	153	2013-04-13	0	0	153		16114	S70_R	70	2015-09-09	0	0	70
1200	S153	153	2013-04-14	0	0	153		16115	S70_R	70	2015-09-10	0	0	70
1201	S153	153	2013-04-15	0.03	0.076	153		16116	S70_R	70	2015-09-11	0	0	70
1202	S153	153	2013-04-16	0.16	0.406	153		16117	S70_R	70	2015-09-12	0.18	0.4572	70
1203	S153	153	2013-04-17	0	0	153		16118	S70_R	70	2015-09-13	0.21	0.5334	70
1204	S153	153	2013-04-18	0	0	153		16119	S70_R	70	2015-09-14	0.22	0.5588	70
1205	S153	153	2013-04-19	0.05	0.127	153		16120	S70_R	70	2015-09-15	1.66	4.2164	70
1206	S153	153	2013-04-20	0.03	0.076	153		16121	S70_R	70	2015-09-16	0.08	0.2032	70
1207	S153	153	2013-04-21	0.05	0.127	153		16122	S70_R	70	2015-09-17	0.15	0.381	70
1208	S153	153	2013-04-22	0.9	2.286	153		16123	S70_R	70	2015-09-18	1.58	4.0132	70
1209	S153	153	2013-04-23	0	0	153		16124	S70_R	70	2015-09-19	0	0	70
1210	S153	153	2013-04-24	0	0	153		16125	S70_R	70	2015-09-20	0	0	70
1211	S153	153	2013-04-25	0	0	153		16126	S70_R	70	2015-09-21	0	0	70
1212	S153	153	2013-04-26	0	0	153		16127	S70_R	70	2015-09-22	0	0	70
1213	S153	153	2013-04-27	0	0	153		16128	S70_R	70	2015-09-23	0	0	70
1214	S153	153	2013-04-28	0	0	153		16129	S70_R	70	2015-09-24	0	0	70
1215	S153	153	2013-04-29	0	0	153		16130	S70_R	70	2015-09-25	0	0	70
1216	S153	153	2013-04-30	0	0	153		16131	S70_R	70	2015-09-26	2.73	6.9342	70
1217	S153	153	2013-05-01	1.2	3.048	153		16132	S70_R	70	2015-09-27	0	0	70
1218	S153	153	2013-05-02	0.11	0.279	153		16133	S70_R	70	2015-09-28	0.01	0.0254	70
1219	S153	153	2013-05-03	0	0	153		16134	S70_R	70	2015-09-29	0.34	0.8636	70
1220	S153	153	2013-05-04	0	0	153		16135	S70_R	70	2015-09-30	0.35	0.889	70
1221	S153	153	2013-05-05	0	0	153		16136	S70_R	70	2015-10-01	0	0	70
1222	S153	153	2013-05-06	0	0	153		16137	S70_R	70	2015-10-02	0	0	70
1223	S153	153	2013-05-07	0	0	153		16138	S70_R	70	2015-10-03	0	0	70
1224	S153	153	2013-05-08	0	0	153		16139	S70_R	70	2015-10-04	0	0	70
1225	S153	153	2013-05-09	0	0	153		16140	S70_R	70	2015-10-05	0.42	1.0668	70
1226	S153	153	2013-05-10	0.09	0.229	153		16141	S70_R	70	2015-10-06	0	0	70
1227	S153	153	2013-05-11	0.25	0.635	153		16142	S70_R	70	2015-10-07	0	0	70
1228	S153	153	2013-05-12	0.32	0.813	153		16143	S70_R	70	2015-10-08	0	0	70
1229	S153	153	2013-05-13	0.01	0.025	153		16144	S70_R	70	2015-10-09	0	0	70
1230	S153	153	2013-05-14	0	0	153		16145	S70_R	70	2015-10-10	0.36	0.9144	70
1231	S153	153	2013-05-15	0	0	153		16146	S70_R	70	2015-10-11	0.38	0.9652	70
1232	S153	153	2013-05-16	0	0	153		16147	S70_R	70	2015-10-12	0.34	0.8636	70
1233	S153	153	2013-05-17	0	0	153		16148	S70_R	70	2015-10-13	0	0	70
1234	S153	153	2013-05-18	0	0	153		16149	S70_R	70	2015-10-14	0	0	70
1235	S153	153	2013-05-19	0	0	153		16150	S70_R	70	2015-10-15	0	0	70
1236	S153	153	2013-05-20	0.38	0.965	153		16151	S70_R	70	2015-10-16	0	0	70
1237	S153	153	2013-05-21	0.44	1.118	153		16152	S70_R	70	2015-10-17	0	0	70
1238	S153	153	2013-05-22	0	0	153		16153	S70_R	70	2015-10-18	0	0	70
1239	S153	153	2013-05-23	0	0	153		16154	S70_R	70	2015-10-19	0	0	70
1240	S153	153	2013-05-24	0	0	153		16155	S70_R	70	2015-10-20	0	0	70
1241	S153	153	2013-05-25	0	0	153		16156	S70_R	70	2015-10-21	0.02	0.0508	70
1242	S153	153	2013-05-26	0	0	153		16157	S70_R	70	2015-10-22	0	0	70
1243	S153	153	2013-05-27	0	0	153		16158	S70_R	70	2015-10-23	0.06	0.1524	70
1244	S153	153	2013-05-28	0.19	0.483	153		16159	S70_R	70	2015-10-24	0.01	0.0254	70
1245	S153	153	2013-05-29	1.58	4.013	153		16160	S70_R	70	2015-10-25	0	0	70
1246	S153	153	2013-05-30	0.16	0.406	153		16161	S70_R	70	2015-10-26	0	0	70
1247	S153	153	2013-05-31	0.05	0.127	153		16162	S70_R	70	2015-10-27	0	0	70
1248	S153	153	2013-06-01	0.06	0.152	153		16163	S70_R	70	2015-10-28	0.49	1.2446	70
1249	S153	153	2013-06-02	0.15	0.381	153		16164	S70_R	70	2015-10-29	0.02	0.0508	70
1250	S153	153	2013-06-03	0.03	0.076	153		16165	S70_R	70	2015-10-30	0	0	70
1251	S153	153	2013-06-04	0.24	0.61	153		16166	S70_R	70	2015-10-31	0	0	70
1252	S153	153	2013-06-05	0.08	0.203	153		16167	S70_R	70	2015-11-01	0	0	70
1253	S153	153	2013-06-06	1.76	4.47	153		16168	S70_R	70	2015-11-02	0.01	0.0254	70
1254	S153	153	2013-06-07	0.59	1.499	153		16169	S70_R	70	2015-11-03	0	0	70
1255	S153	153	2013-06-08	0.4	1.016	153		16170	S70_R	70	2015-11-04	0	0	70
1256	S153	153	2013-06-09	0	0	153		16171	S70_R	70	2015-11-05	0	0	70
1257	S153	153	2013-06-10	0	0	153		16172	S70_R	70	2015-11-06	0	0	70
1258	S153	153	2013-06-11	0.4	1.016	153		16173	S70_R	70	2015-11-07	0	0	70
1259	S153	153	2013-06-12	0.74	1.88	153		16174	S70_R	70	2015-11-08	0	0	70
1260	S153	153	2013-06-13	0	0	153		16175	S70_R	70	2015-11-09	0	0	70
1261	S153	153	2013-06-14	0	0	153		16176	S70_R	70	2015-11-10	0.43	1.0922	70
1262	S153	153	2013-06-15	0	0	153		16177	S70_R	70	2015-11-11	1.24	3.1496	70
1263	S153	153	2013-06-16	0	0	153		16178	S70_R	70	2015-11-12	0	0	70
1264	S153	153	2013-06-17	0.87	2.21	153		16179	S70_R	70	2015-11-13	0	0	70
1265	S153	153	2013-06-18	0	0	153		16180	S70_R	70	2015-11-14	0.16	0.4064	70
1266	S153	153	2013-06-19	0	0	153		16181	S70_R	70	2015-11-15	0	0	70
1267	S153	153	2013-06-20	0.16	0.406	153		16182	S70_R	70	2015-11-16	0	0	70
1268	S153	153	2013-06-21	0.25	0.635	153		16183	S70_R	70	2015-11-17	0	0	70
1269	S153	153	2013-06-22	0.67	1.702	153		16184	S70_R	70	2015-11-18	0.1	0.254	70
1270	S153	153	2013-06-23	0.02	0.051	153		16185	S70_R	70	2015-11-19	0	0	70
1271	S153	153	2013-06-24	0	0	153		16186	S70_R	70	2015-11-20	0.96	2.4384	70
1272	S153	153	2013-06-25	0	0	153		16187	S70_R	70	2015-11-21	0.26	0.6604	70
1273	S153	153	2013-06-26	0.77	1.956	153		16188	S70_R	70	2015-11-22	0.89	2.2606	70
1274	S153	153	2013-06-27	0.07	0.178	153		16189	S70_R	70	2015-11-23	0.33	0.8382	70
1275	S153	153	2013-06-28	0	0	153		16190	S70_R	70	2015-11-24	0	0	70
1276	S153	153	2013-06-29	0.05	0.127	153		16191	S70_R	70	2015-11-25	0	0	70
1277	S153	153	2013-06-30	0.84	2.134	153		16192	S70_R	70	2015-11-26	0.02	0.0508	70
1278	S153	153	2013-07-01	0.3	0.762	153		16193	S70_R	70	2015-11-27	0	0	70
1279	S153	153	2013-07-02	1.26	3.2	153		16194	S70_R	70	2015-11-28	0.01	0.0254	70
1280	S153	153	2013-07-03	0	0	153		16195	S70_R	70	2015-11-29	0	0	70
1281	S153	153	2013-07-04	0.19	0.483	153		16196	S70_R	70	2015-11-30	0	0	70
1282	S153	153	2013-07-05	0.63	1.6	153		18498	S70_R	70	2015-06-01	0.03	0.0762	70
1283	S153	153	2013-07-06	0.08	0.203	153		18499	S70_R	70	2015-06-02	0.3	0.762	70
1284	S153	153	2013-07-07	0	0	153		18500	S70_R	70	2015-06-03	0.13	0.3302	70
1285	S153	153	2013-07-08	0	0	153		18501	S70_R	70	2015-06-04	0	0	70
1286	S153	153	2013-07-09	0.01	0.025	153		18502	S70_R	70	2015-06-05	0	0	70
1287	S153	153	2013-07-10	0	0	153		18503	S70_R	70	2015-06-06	0.51	1.2954	70
1288	S153	153	2013-07-11	0	0	153		18504	S70_R	70	2015-06-07	0.01	0.0254	70
1289	S153	153	2013-07-12	0	0	153		18505	S70_R	70	2015-06-08	0	0	70
1290	S153	153	2013-07-13	0.57	1.448	153		18506	S70_R	70	2015-06-09	0.48	1.2192	70
1291	S153	153	2013-07-14	1.23	3.124	153		18507	S70_R	70	2015-06-10	2.04	5.1816	70
1292	S153	153	2013-07-15	0.14	0.356	153		18508	S70_R	70	2015-06-11	0.13	0.3302	70
1293	S153	153	2013-07-16	1.09	2.769	153		18509	S70_R	70	2015-06-12	0	0	70
1294	S153	153	2013-07-17	0.02	0.051	153		18510	S70_R	70	2015-06-13	0	0	70
1295	S153	153	2013-07-18	0.48	1.219	153		18511	S70_R	70	2015-06-14	0	0	70
1296	S153	153	2013-07-19	0	0	153		18512	S70_R	70	2015-06-15	0	0	70
1297	S153	153	2013-07-20	0.45	1.143	153		18513	S70_R	70	2015-06-16	0.21	0.5334	70
1298	S153	153	2013-07-21	0.01	0.025	153		18514	S70_R	70	2015-06-17	0	0	70
1299	S153	153	2013-07-22	0	0	153		18515	S70_R	70	2015-06-18	0	0	70
1300	S153	153	2013-07-23	0	0	153		18516	S70_R	70	2015-06-19	0	0	70
1301	S153	153	2013-07-24	0	0	153		18517	S70_R	70	2015-06-20	0	0	70
1302	S153	153	2013-07-25	0.01	0.025	153		18518	S70_R	70	2015-06-21	0	0	70
1303	S153	153	2013-07-26	0.46	1.168	153		18519	S70_R	70	2015-06-22	0	0	70
1304	S153	153	2013-07-27	0	0	153		18520	S70_R	70	2015-06-23	0.04	0.1016	70
1305	S153	153	2013-07-28	0	0	153		18521	S70_R	70	2015-06-24	0	0	70
1306	S153	153	2013-07-29	0	0	153		18522	S70_R	70	2015-06-25	0.04	0.1016	70
1307	S153	153	2013-07-30	0.03	0.076	153		18523	S70_R	70	2015-06-26	0.01	0.0254	70
1308	S153	153	2013-07-31	0	0	153		18524	S70_R	70	2015-06-27	0	0	70
1309	S153	153	2013-08-01	0	0	153		18525	S70_R	70	2015-06-28	0	0	70
1310	S153	153	2013-08-02	0	0	153		18526	S70_R	70	2015-06-29	0.62	1.5748	70
1311	S153	153	2013-08-03	0	0	153		18527	S70_R	70	2015-06-30	1.28	3.2512	70
1312	S153	153	2013-08-04	0	0	153		18528	S70_R	70	2015-07-01	0	0	70
1313	S153	153	2013-08-05	0.95	2.413	153		18529	S70_R	70	2015-07-02	0	0	70
1314	S153	153	2013-08-06	0	0	153		18530	S70_R	70	2015-07-03	0	0	70
1315	S153	153	2013-08-07	0	0	153		18531	S70_R	70	2015-07-04	0	0	70
1316	S153	153	2013-08-08	0	0	153		18532	S70_R	70	2015-07-05	0.76	1.9304	70
1317	S153	153	2013-08-09	0.48	1.219	153		18533	S70_R	70	2015-07-06	0.06	0.1524	70
1318	S153	153	2013-08-10	0	0	153		18534	S70_R	70	2015-07-07	0.32	0.8128	70
1319	S153	153	2013-08-11	0	0	153		18535	S70_R	70	2015-07-08	0	0	70
1320	S153	153	2013-08-12	0	0	153		18536	S70_R	70	2015-07-09	0.25	0.635	70
1321	S153	153	2013-08-13	0.03	0.076	153		18537	S70_R	70	2015-07-10	0	0	70
1322	S153	153	2013-08-14	0.06	0.152	153		18538	S70_R	70	2015-07-11	0	0	70
1323	S153	153	2013-08-15	0.15	0.381	153		18539	S70_R	70	2015-07-12	0	0	70
1324	S153	153	2013-08-16	0	0	153		18540	S70_R	70	2015-07-13	0.06	0.1524	70
1325	S153	153	2013-08-17	0	0	153		18541	S70_R	70	2015-07-14	0.01	0.0254	70
1326	S153	153	2013-08-18	0	0	153		18542	S70_R	70	2015-07-15	0.26	0.6604	70
1327	S153	153	2013-08-19	0.01	0.025	153		18543	S70_R	70	2015-07-16	0.58	1.4732	70
1328	S153	153	2013-08-20	0	0	153		18544	S70_R	70	2015-07-17	0	0	70
1329	S153	153	2013-08-21	0.05	0.127	153		18545	S70_R	70	2015-07-18	0.01	0.0254	70
1330	S153	153	2013-08-22	0	0	153		18546	S70_R	70	2015-07-19	0.03	0.0762	70
1331	S153	153	2013-08-23	0.36	0.914	153		18547	S70_R	70	2015-07-20	0.06	0.1524	70
1332	S153	153	2013-08-24	0.07	0.178	153		18548	S70_R	70	2015-07-21	0	0	70
1333	S153	153	2013-08-25	0	0	153		18549	S70_R	70	2015-07-22	0	0	70
1334	S153	153	2013-08-26	0.14	0.356	153		18550	S70_R	70	2015-07-23	0.02	0.0508	70
1335	S153	153	2013-08-27	0.16	0.406	153		18551	S70_R	70	2015-07-24	0.41	1.0414	70
1336	S153	153	2013-08-28	0.06	0.152	153		18552	S70_R	70	2015-07-25	0	0	70
1337	S153	153	2013-08-29	0.01	0.025	153		18553	S70_R	70	2015-07-26	0.02	0.0508	70
1338	S153	153	2013-08-30	0	0	153		18554	S70_R	70	2015-07-27	0.06	0.1524	70
1339	S153	153	2013-08-31	0.14	0.356	153		18555	S70_R	70	2015-07-28	0.01	0.0254	70
1340	S153	153	2013-09-01	0	0	153		18556	S70_R	70	2015-07-29	0.34	0.8636	70
1341	S153	153	2013-09-02	0	0	153		18557	S70_R	70	2015-07-30	0.61	1.5494	70
1342	S153	153	2013-09-03	0	0	153		18558	S70_R	70	2015-07-31	0.05	0.127	70
1343	S153	153	2013-09-04	0	0	153		18559	S70_R	70	2015-08-01	0.29	0.7366	70
1344	S153	153	2013-09-05	0	0	153		18560	S70_R	70	2015-08-02	0.16	0.4064	70
1345	S153	153	2013-09-06	0.08	0.203	153		18561	S70_R	70	2015-08-03	0	0	70
1346	S153	153	2013-09-07	0.08	0.203	153		18562	S70_R	70	2015-08-04	0	0	70
1347	S153	153	2013-09-08	0	0	153		18563	S70_R	70	2015-08-05	0	0	70
1348	S153	153	2013-09-09	0	0	153		18564	S70_R	70	2015-08-06	0	0	70
1349	S153	153	2013-09-10	0.39	0.991	153		18565	S70_R	70	2015-08-07	0	0	70
1350	S153	153	2013-09-11	0.01	0.025	153		18566	S70_R	70	2015-08-08	0.06	0.1524	70
1351	S153	153	2013-09-12	0.67	1.702	153		18567	S70_R	70	2015-08-09	0	0	70
1352	S153	153	2013-09-13	0	0	153		18568	S70_R	70	2015-08-10	0.01	0.0254	70
1353	S153	153	2013-09-14	0	0	153		18569	S70_R	70	2015-08-11	0	0	70
1354	S153	153	2013-09-15	0.24	0.61	153		18570	S70_R	70	2015-08-12	0.04	0.1016	70
1355	S153	153	2013-09-16	0.32	0.813	153		18571	S70_R	70	2015-08-13	1.67	4.2418	70
1356	S153	153	2013-09-17	0.23	0.584	153		18572	S70_R	70	2015-08-14	0.23	0.5842	70
1357	S153	153	2013-09-18	0.65	1.651	153		18573	S70_R	70	2015-08-15	0.63	1.6002	70
1358	S153	153	2013-09-19	0.03	0.076	153		18574	S70_R	70	2015-08-16	0	0	70
1359	S153	153	2013-09-20	0.01	0.025	153		18575	S70_R	70	2015-08-17	0	0	70
1360	S153	153	2013-09-21	0	0	153		18576	S70_R	70	2015-08-18	0	0	70
1361	S153	153	2013-09-22	0	0	153		18577	S70_R	70	2015-08-19	0.01	0.0254	70
1362	S153	153	2013-09-23	2.05	5.207	153		18578	S70_R	70	2015-08-20	0.01	0.0254	70
1363	S153	153	2013-09-24	1.16	2.946	153		18579	S70_R	70	2015-08-21	0	0	70
1364	S153	153	2013-09-25	0	0	153		18580	S70_R	70	2015-08-22	0	0	70
1365	S153	153	2013-09-26	0.3	0.762	153		18581	S70_R	70	2015-08-23	0	0	70
1366	S153	153	2013-09-27	0	0	153		18582	S70_R	70	2015-08-24	0	0	70
1367	S153	153	2013-09-28	0	0	153		18583	S70_R	70	2015-08-25	0.15	0.381	70
1368	S153	153	2013-09-29	0	0	153		18584	S70_R	70	2015-08-26	0.46	1.1684	70
1369	S153	153	2013-09-30	0	0	153		18585	S70_R	70	2015-08-27	0.43	1.0922	70
1370	S153	153	2013-10-01	0	0	153		18586	S70_R	70	2015-08-28	0.67	1.7018	70
1371	S153	153	2013-10-02	0	0	153		18587	S70_R	70	2015-08-29	0.17	0.4318	70
1372	S153	153	2013-10-03	0	0	153		18588	S70_R	70	2015-08-30	0.26	0.6604	70
1373	S153	153	2013-10-04	0	0	153		18589	S70_R	70	2015-08-31	0.57	1.4478	70
1374	S153	153	2013-10-05	0	0	153		18590	S70_R	70	2015-09-01	0	0	70
1375	S153	153	2013-10-06	1.17	2.972	153		18591	S70_R	70	2015-09-02	0	0	70
1376	S153	153	2013-10-07	0.65	1.651	153		18592	S70_R	70	2015-09-03	0.23	0.5842	70
1377	S153	153	2013-10-08	0	0	153		18593	S70_R	70	2015-09-04	0.28	0.7112	70
1378	S153	153	2013-10-09	0	0	153		18594	S70_R	70	2015-09-05	0.38	0.9652	70
1379	S153	153	2013-10-10	0	0	153		18595	S70_R	70	2015-09-06	0.84	2.1336	70
1380	S153	153	2013-10-11	0	0	153		18596	S70_R	70	2015-09-07	0.06	0.1524	70
1381	S153	153	2013-10-12	0	0	153		18597	S70_R	70	2015-09-08	0	0	70
1382	S153	153	2013-10-13	0	0	153		18598	S70_R	70	2015-09-09	0	0	70
1383	S153	153	2013-10-14	0	0	153		18599	S70_R	70	2015-09-10	0	0	70
1384	S153	153	2013-10-15	0	0	153		18600	S70_R	70	2015-09-11	0.17	0.4318	70
1385	S153	153	2013-10-16	0	0	153		18601	S70_R	70	2015-09-12	0.22	0.5588	70
1386	S153	153	2013-10-17	0	0	153		18602	S70_R	70	2015-09-13	0.22	0.5588	70
1387	S153	153	2013-10-18	0	0	153		18603	S70_R	70	2015-09-14	1.66	4.2164	70
1388	S153	153	2013-10-19	0	0	153		18604	S70_R	70	2015-09-15	0.08	0.2032	70
1389	S153	153	2013-10-20	0	0	153		18605	S70_R	70	2015-09-16	0.04	0.1016	70
1390	S153	153	2013-10-21	0	0	153		18606	S70_R	70	2015-09-17	1.68	4.2672	70
1391	S153	153	2013-10-22	0	0	153		18607	S70_R	70	2015-09-18	0.01	0.0254	70
1392	S153	153	2013-10-23	0	0	153		18608	S70_R	70	2015-09-19	0	0	70
1393	S153	153	2013-10-24	0	0	153		18609	S70_R	70	2015-09-20	0	0	70
1394	S153	153	2013-10-25	0	0	153		18610	S70_R	70	2015-09-21	0	0	70
1395	S153	153	2013-10-26	0	0	153		18611	S70_R	70	2015-09-22	0	0	70
1396	S153	153	2013-10-27	0	0	153		18612	S70_R	70	2015-09-23	0	0	70
1397	S153	153	2013-10-28	0	0	153		18613	S70_R	70	2015-09-24	0	0	70
1398	S153	153	2013-10-29	0	0	153		18614	S70_R	70	2015-09-25	2.72	6.9088	70
1399	S153	153	2013-10-30	0	0	153		18615	S70_R	70	2015-09-26	0.01	0.0254	70
1400	S153	153	2013-10-31	0	0	153		18616	S70_R	70	2015-09-27	0.01	0.0254	70
1401	S153	153	2013-11-01	0	0	153		18617	S70_R	70	2015-09-28	0.18	0.4572	70
1402	S153	153	2013-11-02	0	0	153		18618	S70_R	70	2015-09-29	0.5	1.27	70
1403	S153	153	2013-11-03	0	0	153		18619	S70_R	70	2015-09-30	0.01	0.0254	70
1404	S153	153	2013-11-04	0	0	153		18620	S70_R	70	2015-10-01	0	0	70
1405	S153	153	2013-11-05	0	0	153		18621	S70_R	70	2015-10-02	0	0	70
1406	S153	153	2013-11-06	0	0	153		18622	S70_R	70	2015-10-03	0	0	70
1407	S153	153	2013-11-07	0	0	153		18623	S70_R	70	2015-10-04	0.42	1.0668	70
1408	S153	153	2013-11-08	0	0	153		18624	S70_R	70	2015-10-05	0	0	70
1409	S153	153	2013-11-09	0	0	153		18625	S70_R	70	2015-10-06	0	0	70
1410	S153	153	2013-11-10	0	0	153		18626	S70_R	70	2015-10-07	0	0	70
1411	S153	153	2013-11-11	0	0	153		18627	S70_R	70	2015-10-08	0	0	70
1412	S153	153	2013-11-12	0	0	153		18628	S70_R	70	2015-10-09	0.36	0.9144	70
1413	S153	153	2013-11-13	0	0	153		18629	S70_R	70	2015-10-10	0.37	0.9398	70
1414	S153	153	2013-11-14	0	0	153		18630	S70_R	70	2015-10-11	0.35	0.889	70
1415	S153	153	2013-11-15	0	0	153		18631	S70_R	70	2015-10-12	0	0	70
1416	S153	153	2013-11-16	0	0	153		18632	S70_R	70	2015-10-13	0	0	70
1417	S153	153	2013-11-17	0	0	153		18633	S70_R	70	2015-10-14	0	0	70
1418	S153	153	2013-11-18	0	0	153		18634	S70_R	70	2015-10-15	0	0	70
1419	S153	153	2013-11-19	0.01	0.025	153		18635	S70_R	70	2015-10-16	0	0	70
1420	S153	153	2013-11-20	0	0	153		18636	S70_R	70	2015-10-17	0	0	70
1421	S153	153	2013-11-21	0.33	0.838	153		18637	S70_R	70	2015-10-18	0	0	70
1422	S153	153	2013-11-22	0	0	153		18638	S70_R	70	2015-10-19	0	0	70
1423	S153	153	2013-11-23	0	0	153		18639	S70_R	70	2015-10-20	0	0	70
1424	S153	153	2013-11-24	0	0	153		18640	S70_R	70	2015-10-21	0.02	0.0508	70
1425	S153	153	2013-11-25	0	0	153		18641	S70_R	70	2015-10-22	0	0	70
1426	S153	153	2013-11-26	0.04	0.102	153		18642	S70_R	70	2015-10-23	0.07	0.1778	70
1427	S153	153	2013-11-27	0.18	0.457	153		18643	S70_R	70	2015-10-24	0	0	70
1428	S153	153	2013-11-28	0	0	153		18644	S70_R	70	2015-10-25	0	0	70
1429	S153	153	2013-11-29	0	0	153		18645	S70_R	70	2015-10-26	0	0	70
1430	S153	153	2013-11-30	0.07	0.178	153		18646	S70_R	70	2015-10-27	0	0	70
1431	S153	153	2013-12-01	0.01	0.025	153		18647	S70_R	70	2015-10-28	0.51	1.2954	70
1432	S153	153	2013-12-02	0	0	153		18648	S70_R	70	2015-10-29	0	0	70
1433	S153	153	2013-12-03	0	0	153		18649	S70_R	70	2015-10-30	0	0	70
1434	S153	153	2013-12-04	0	0	153		18650	S70_R	70	2015-10-31	0	0	70
1435	S153	153	2013-12-05	0	0	153		18651	S70_R	70	2015-11-01	0	0	70
1436	S153	153	2013-12-06	0.01	0.025	153		18652	S70_R	70	2015-11-02	0.01	0.0254	70
1437	S153	153	2013-12-07	0	0	153		18653	S70_R	70	2015-11-03	0	0	70
1438	S153	153	2013-12-08	0	0	153		18654	S70_R	70	2015-11-04	0	0	70
1439	S153	153	2013-12-09	0	0	153		18655	S70_R	70	2015-11-05	0	0	70
1440	S153	153	2013-12-10	0	0	153		18656	S70_R	70	2015-11-06	0	0	70
1441	S153	153	2013-12-11	0	0	153		18657	S70_R	70	2015-11-07	0	0	70
1442	S153	153	2013-12-12	0	0	153		18658	S70_R	70	2015-11-08	0	0	70
1443	S153	153	2013-12-13	0	0	153		18659	S70_R	70	2015-11-09	0.42	1.0668	70
1444	S153	153	2013-12-14	0	0	153		18660	S70_R	70	2015-11-10	1.25	3.175	70
1445	S153	153	2013-12-15	0.01	0.025	153		18661	S70_R	70	2015-11-11	0	0	70
1446	S153	153	2013-12-16	0	0	153		18662	S70_R	70	2015-11-12	0	0	70
1447	S153	153	2013-12-17	0	0	153		18663	S70_R	70	2015-11-13	0.16	0.4064	70
1448	S153	153	2013-12-18	0	0	153		18664	S70_R	70	2015-11-14	0	0	70
1449	S153	153	2013-12-19	0	0	153		18665	S70_R	70	2015-11-15	0	0	70
1450	S153	153	2013-12-20	0	0	153		18666	S70_R	70	2015-11-16	0	0	70
1451	S153	153	2013-12-21	0	0	153		18667	S70_R	70	2015-11-17	0	0	70
1452	S153	153	2013-12-22	0	0	153		18668	S70_R	70	2015-11-18	0.1	0.254	70
1453	S153	153	2013-12-23	0.22	0.559	153		18669	S70_R	70	2015-11-19	2.36	5.9944	70
1454	S153	153	2013-12-24	0	0	153		18670	S70_R	70	2015-11-20	0.12	0.3048	70
1455	S153	153	2013-12-25	0	0	153		18671	S70_R	70	2015-11-21	0.5	1.27	70
1456	S153	153	2013-12-26	0.11	0.279	153		18672	S70_R	70	2015-11-22	0.74	1.8796	70
1457	S153	153	2013-12-27	0	0	153		18673	S70_R	70	2015-11-23	0	0	70
1458	S153	153	2013-12-28	0	0	153		18674	S70_R	70	2015-11-24	0	0	70
1459	S153	153	2013-12-29	0	0	153		18675	S70_R	70	2015-11-25	0	0	70
1460	S153	153	2013-12-30	0	0	153		18676	S70_R	70	2015-11-26	0	0	70
1461	S153	153	2013-12-31	0	0	153		18677	S70_R	70	2015-11-27	0.01	0.0254	70
1462	S153	153	2014-01-01	0.12	0.305	153		18678	S70_R	70	2015-11-28	0	0	70
1463	S153	153	2014-01-02	0.01	0.025	153		18679	S70_R	70	2015-11-29	0	0	70
1464	S153	153	2014-01-03	0	0	153		18680	S70_R	70	2015-11-30	0	0	70
1465	S153	153	2014-01-04	0.04	0.102	153		20871	S70_R	70	2015-06-01	0.03	0.0762	70
1466	S153	153	2014-01-05	0	0	153		20872	S70_R	70	2015-06-02	0.3	0.762	70
1467	S153	153	2014-01-06	0	0	153		20873	S70_R	70	2015-06-03	0.13	0.3302	70
1468	S153	153	2014-01-07	0	0	153		20874	S70_R	70	2015-06-04	0	0	70
1469	S153	153	2014-01-08	0.01	0.025	153		20875	S70_R	70	2015-06-05	0	0	70
1470	S153	153	2014-01-09	0.46	1.168	153		20876	S70_R	70	2015-06-06	0.51	1.2954	70
1471	S153	153	2014-01-10	0	0	153		20877	S70_R	70	2015-06-07	0.01	0.0254	70
1472	S153	153	2014-01-11	0	0	153		20878	S70_R	70	2015-06-08	0	0	70
1473	S153	153	2014-01-12	0	0	153		20879	S70_R	70	2015-06-09	0.48	1.2192	70
1474	S153	153	2014-01-13	0	0	153		20880	S70_R	70	2015-06-10	2.04	5.1816	70
1475	S153	153	2014-01-14	0	0	153		20881	S70_R	70	2015-06-11	0.13	0.3302	70
1476	S153	153	2014-01-15	0	0	153		20882	S70_R	70	2015-06-12	0	0	70
1477	S153	153	2014-01-16	0	0	153		20883	S70_R	70	2015-06-13	0	0	70
1478	S153	153	2014-01-17	0	0	153		20884	S70_R	70	2015-06-14	0	0	70
1479	S153	153	2014-01-18	0	0	153		20885	S70_R	70	2015-06-15	0	0	70
1480	S153	153	2014-01-19	0	0	153		20886	S70_R	70	2015-06-16	0.21	0.5334	70
1481	S153	153	2014-01-20	0	0	153		20887	S70_R	70	2015-06-17	0	0	70
1482	S153	153	2014-01-21	0	0	153		20888	S70_R	70	2015-06-18	0	0	70
1483	S153	153	2014-01-22	0	0	153		20889	S70_R	70	2015-06-19	0	0	70
1484	S153	153	2014-01-23	0	0	153		20890	S70_R	70	2015-06-20	0	0	70
1485	S153	153	2014-01-24	0	0	153		20891	S70_R	70	2015-06-21	0	0	70
1486	S153	153	2014-01-25	0	0	153		20892	S70_R	70	2015-06-22	0	0	70
1487	S153	153	2014-01-26	0	0	153		20893	S70_R	70	2015-06-23	0.04	0.1016	70
1488	S153	153	2014-01-27	0	0	153		20894	S70_R	70	2015-06-24	0	0	70
1489	S153	153	2014-01-28	0	0	153		20895	S70_R	70	2015-06-25	0.04	0.1016	70
1490	S153	153	2014-01-29	0.79	2.007	153		20896	S70_R	70	2015-06-26	0.01	0.0254	70
1491	S153	153	2014-01-30	0.88	2.235	153		20897	S70_R	70	2015-06-27	0	0	70
1492	S153	153	2014-01-31	0.03	0.076	153		20898	S70_R	70	2015-06-28	0	0	70
1493	S153	153	2014-02-01	0	0	153		20899	S70_R	70	2015-06-29	0.62	1.5748	70
1494	S153	153	2014-02-02	0	0	153		20900	S70_R	70	2015-06-30	1.28	3.2512	70
1495	S153	153	2014-02-03	0	0	153		20901	S70_R	70	2015-07-01	0	0	70
1496	S153	153	2014-02-04	0	0	153		20902	S70_R	70	2015-07-02	0	0	70
1497	S153	153	2014-02-05	0.42	1.067	153		20903	S70_R	70	2015-07-03	0	0	70
1498	S153	153	2014-02-06	0	0	153		20904	S70_R	70	2015-07-04	0	0	70
1499	S153	153	2014-02-07	0	0	153		20905	S70_R	70	2015-07-05	0.76	1.9304	70
1500	S153	153	2014-02-08	0	0	153		20906	S70_R	70	2015-07-06	0.06	0.1524	70
1501	S153	153	2014-02-09	0	0	153		20907	S70_R	70	2015-07-07	0.32	0.8128	70
1502	S153	153	2014-02-10	0	0	153		20908	S70_R	70	2015-07-08	0	0	70
1503	S153	153	2014-02-11	0	0	153		20909	S70_R	70	2015-07-09	0.25	0.635	70
1504	S153	153	2014-02-12	1.13	2.87	153		20910	S70_R	70	2015-07-10	0	0	70
1505	S153	153	2014-02-13	0	0	153		20911	S70_R	70	2015-07-11	0	0	70
1506	S153	153	2014-02-14	0	0	153		20912	S70_R	70	2015-07-12	0	0	70
1507	S153	153	2014-02-15	0	0	153		20913	S70_R	70	2015-07-13	0.06	0.1524	70
1508	S153	153	2014-02-16	0	0	153		20914	S70_R	70	2015-07-14	0.01	0.0254	70
1509	S153	153	2014-02-17	0	0	153		20915	S70_R	70	2015-07-15	0.26	0.6604	70
1510	S153	153	2014-02-18	0	0	153		20916	S70_R	70	2015-07-16	0.58	1.4732	70
1511	S153	153	2014-02-19	0	0	153		20917	S70_R	70	2015-07-17	0	0	70
1512	S153	153	2014-02-20	0	0	153		20918	S70_R	70	2015-07-18	0.01	0.0254	70
1513	S153	153	2014-02-21	0	0	153		20919	S70_R	70	2015-07-19	0.03	0.0762	70
1514	S153	153	2014-02-22	0.53	1.346	153		20920	S70_R	70	2015-07-20	0.06	0.1524	70
1515	S153	153	2014-02-23	0.02	0.051	153		20921	S70_R	70	2015-07-21	0	0	70
1516	S153	153	2014-02-24	0	0	153		20922	S70_R	70	2015-07-22	0	0	70
1517	S153	153	2014-02-25	0	0	153		20923	S70_R	70	2015-07-23	0.02	0.0508	70
1518	S153	153	2014-02-26	0	0	153		20924	S70_R	70	2015-07-24	0.41	1.0414	70
1519	S153	153	2014-02-27	0.03	0.076	153		20925	S70_R	70	2015-07-25	0	0	70
1520	S153	153	2014-02-28	0.03	0.076	153		20926	S70_R	70	2015-07-26	0.02	0.0508	70
1521	S153	153	2014-03-01	0	0	153		20927	S70_R	70	2015-07-27	0.06	0.1524	70
1522	S153	153	2014-03-02	0	0	153		20928	S70_R	70	2015-07-28	0.01	0.0254	70
1523	S153	153	2014-03-03	0	0	153		20929	S70_R	70	2015-07-29	0.34	0.8636	70
1524	S153	153	2014-03-04	0	0	153		20930	S70_R	70	2015-07-30	0.61	1.5494	70
1525	S153	153	2014-03-05	0.24	0.61	153		20931	S70_R	70	2015-07-31	0.05	0.127	70
1526	S153	153	2014-03-06	0.19	0.483	153		20932	S70_R	70	2015-08-01	0.29	0.7366	70
1527	S153	153	2014-03-07	0.06	0.152	153		20933	S70_R	70	2015-08-02	0.16	0.4064	70
1528	S153	153	2014-03-08	0	0	153		20934	S70_R	70	2015-08-03	0	0	70
1529	S153	153	2014-03-09	0	0	153		20935	S70_R	70	2015-08-04	0	0	70
1530	S153	153	2014-03-10	0	0	153		20936	S70_R	70	2015-08-05	0	0	70
1531	S153	153	2014-03-11	0	0	153		20937	S70_R	70	2015-08-06	0	0	70
1532	S153	153	2014-03-12	0	0	153		20938	S70_R	70	2015-08-07	0	0	70
1533	S153	153	2014-03-13	0	0	153		20939	S70_R	70	2015-08-08	0.06	0.1524	70
1534	S153	153	2014-03-14	0	0	153		20940	S70_R	70	2015-08-09	0	0	70
1535	S153	153	2014-03-15	0	0	153		20941	S70_R	70	2015-08-10	0.01	0.0254	70
1536	S153	153	2014-03-16	0	0	153		20942	S70_R	70	2015-08-11	0	0	70
1537	S153	153	2014-03-17	0	0	153		20943	S70_R	70	2015-08-12	0.04	0.1016	70
1538	S153	153	2014-03-18	0.21	0.533	153		20944	S70_R	70	2015-08-13	1.67	4.2418	70
1539	S153	153	2014-03-19	0	0	153		20945	S70_R	70	2015-08-14	0.23	0.5842	70
1540	S153	153	2014-03-20	0	0	153		20946	S70_R	70	2015-08-15	0.63	1.6002	70
1541	S153	153	2014-03-21	0	0	153		20947	S70_R	70	2015-08-16	0	0	70
1542	S153	153	2014-03-22	0	0	153		20948	S70_R	70	2015-08-17	0	0	70
1543	S153	153	2014-03-23	0	0	153		20949	S70_R	70	2015-08-18	0	0	70
1544	S153	153	2014-03-24	0.73	1.854	153		20950	S70_R	70	2015-08-19	0.01	0.0254	70
1545	S153	153	2014-03-25	0.24	0.61	153		20951	S70_R	70	2015-08-20	0.01	0.0254	70
1546	S153	153	2014-03-26	0	0	153		20952	S70_R	70	2015-08-21	0	0	70
1547	S153	153	2014-03-27	0.03	0.076	153		20953	S70_R	70	2015-08-22	0	0	70
1548	S153	153	2014-03-28	0	0	153		20954	S70_R	70	2015-08-23	0	0	70
1549	S153	153	2014-03-29	0.02	0.051	153		20955	S70_R	70	2015-08-24	0	0	70
1550	S153	153	2014-03-30	0	0	153		20956	S70_R	70	2015-08-25	0.15	0.381	70
1551	S153	153	2014-03-31	0	0	153		20957	S70_R	70	2015-08-26	0.46	1.1684	70
1552	S153	153	2014-04-01	0	0	153		20958	S70_R	70	2015-08-27	0.43	1.0922	70
1553	S153	153	2014-04-02	0	0	153		20959	S70_R	70	2015-08-28	0.67	1.7018	70
1554	S153	153	2014-04-03	0	0	153		20960	S70_R	70	2015-08-29	0.17	0.4318	70
1555	S153	153	2014-04-04	0	0	153		20961	S70_R	70	2015-08-30	0.26	0.6604	70
1556	S153	153	2014-04-05	0	0	153		20962	S70_R	70	2015-08-31	0.57	1.4478	70
1557	S153	153	2014-04-06	0	0	153		20963	S70_R	70	2015-09-01	0	0	70
1558	S153	153	2014-04-07	0.01	0.025	153		20964	S70_R	70	2015-09-02	0	0	70
1559	S153	153	2014-04-08	0.1	0.254	153		20965	S70_R	70	2015-09-03	0.23	0.5842	70
1560	S153	153	2014-04-09	0	0	153		20966	S70_R	70	2015-09-04	0.28	0.7112	70
1561	S153	153	2014-04-10	0	0	153		20967	S70_R	70	2015-09-05	0.38	0.9652	70
1562	S153	153	2014-04-11	0	0	153		20968	S70_R	70	2015-09-06	0.84	2.1336	70
1563	S153	153	2014-04-12	0	0	153		20969	S70_R	70	2015-09-07	0.06	0.1524	70
1564	S153	153	2014-04-13	0	0	153		20970	S70_R	70	2015-09-08	0	0	70
1565	S153	153	2014-04-14	0	0	153		20971	S70_R	70	2015-09-09	0	0	70
1566	S153	153	2014-04-15	0	0	153		20972	S70_R	70	2015-09-10	0	0	70
1567	S153	153	2014-04-16	0	0	153		20973	S70_R	70	2015-09-11	0.17	0.4318	70
1568	S153	153	2014-04-17	0	0	153		20974	S70_R	70	2015-09-12	0.22	0.5588	70
1569	S153	153	2014-04-18	0.15	0.381	153		20975	S70_R	70	2015-09-13	0.22	0.5588	70
1570	S153	153	2014-04-19	0.17	0.432	153		20976	S70_R	70	2015-09-14	1.66	4.2164	70
1571	S153	153	2014-04-20	0	0	153		20977	S70_R	70	2015-09-15	0.08	0.2032	70
1572	S153	153	2014-04-21	0	0	153		20978	S70_R	70	2015-09-16	0.04	0.1016	70
1573	S153	153	2014-04-22	0	0	153		20979	S70_R	70	2015-09-17	1.68	4.2672	70
1574	S153	153	2014-04-23	0	0	153		20980	S70_R	70	2015-09-18	0.01	0.0254	70
1575	S153	153	2014-04-24	0	0	153		20981	S70_R	70	2015-09-19	0	0	70
1576	S153	153	2014-04-25	0	0	153		20982	S70_R	70	2015-09-20	0	0	70
1577	S153	153	2014-04-26	0	0	153		20983	S70_R	70	2015-09-21	0	0	70
1578	S153	153	2014-04-27	0	0	153		20984	S70_R	70	2015-09-22	0	0	70
1579	S153	153	2014-04-28	0	0	153		20985	S70_R	70	2015-09-23	0	0	70
1580	S153	153	2014-04-29	0	0	153		20986	S70_R	70	2015-09-24	0	0	70
1581	S153	153	2014-04-30	0	0	153		20987	S70_R	70	2015-09-25	2.72	6.9088	70
1582	S153	153	2014-05-01	0.07	0.178	153		20988	S70_R	70	2015-09-26	0.01	0.0254	70
1583	S153	153	2014-05-02	0.33	0.838	153		20989	S70_R	70	2015-09-27	0.01	0.0254	70
1584	S153	153	2014-05-03	0.66	1.676	153		20990	S70_R	70	2015-09-28	0.18	0.4572	70
1585	S153	153	2014-05-04	0.03	0.076	153		20991	S70_R	70	2015-09-29	0.5	1.27	70
1586	S153	153	2014-05-05	0	0	153		20992	S70_R	70	2015-09-30	0.01	0.0254	70
1587	S153	153	2014-05-06	0	0	153		20993	S70_R	70	2015-10-01	0	0	70
1588	S153	153	2014-05-07	0	0	153		20994	S70_R	70	2015-10-02	0	0	70
1589	S153	153	2014-05-08	0	0	153		20995	S70_R	70	2015-10-03	0	0	70
1590	S153	153	2014-05-09	0	0	153		20996	S70_R	70	2015-10-04	0.42	1.0668	70
1591	S153	153	2014-05-10	0	0	153		20997	S70_R	70	2015-10-05	0	0	70
1592	S153	153	2014-05-11	0	0	153		20998	S70_R	70	2015-10-06	0	0	70
1593	S153	153	2014-05-12	0	0	153		20999	S70_R	70	2015-10-07	0	0	70
1594	S153	153	2014-05-13	0.08	0.203	153		21000	S70_R	70	2015-10-08	0	0	70
1595	S153	153	2014-05-14	0.05	0.127	153		21001	S70_R	70	2015-10-09	0.36	0.9144	70
1596	S153	153	2014-05-15	0.78	1.981	153		21002	S70_R	70	2015-10-10	0.37	0.9398	70
1597	S153	153	2014-05-16	0	0	153		21003	S70_R	70	2015-10-11	0.35	0.889	70
1598	S153	153	2014-05-17	0	0	153		21004	S70_R	70	2015-10-12	0	0	70
1599	S153	153	2014-05-18	0	0	153		21005	S70_R	70	2015-10-13	0	0	70
1600	S153	153	2014-05-19	0	0	153		21006	S70_R	70	2015-10-14	0	0	70
1601	S153	153	2014-05-20	0	0	153		21007	S70_R	70	2015-10-15	0	0	70
1602	S153	153	2014-05-21	0	0	153		21008	S70_R	70	2015-10-16	0	0	70
1603	S153	153	2014-05-22	0	0	153		21009	S70_R	70	2015-10-17	0	0	70
1604	S153	153	2014-05-23	0	0	153		21010	S70_R	70	2015-10-18	0	0	70
1605	S153	153	2014-05-24	0	0	153		21011	S70_R	70	2015-10-19	0	0	70
1606	S153	153	2014-05-25	0	0	153		21012	S70_R	70	2015-10-20	0	0	70
1607	S153	153	2014-05-26	0	0	153		21013	S70_R	70	2015-10-21	0.02	0.0508	70
1608	S153	153	2014-05-27	0.62	1.575	153		21014	S70_R	70	2015-10-22	0	0	70
1609	S153	153	2014-05-28	0.01	0.025	153		21015	S70_R	70	2015-10-23	0.07	0.1778	70
1610	S153	153	2014-05-29	0.14	0.356	153		21016	S70_R	70	2015-10-24	0	0	70
1611	S153	153	2014-05-30	1.91	4.851	153		21017	S70_R	70	2015-10-25	0	0	70
1612	S153	153	2014-05-31	0.29	0.737	153		21018	S70_R	70	2015-10-26	0	0	70
1613	S153	153	2014-06-01	0.26	0.66	153		21019	S70_R	70	2015-10-27	0	0	70
1614	S153	153	2014-06-02	0.22	0.559	153		21020	S70_R	70	2015-10-28	0.51	1.2954	70
1615	S153	153	2014-06-03	0	0	153		21021	S70_R	70	2015-10-29	0	0	70
1616	S153	153	2014-06-04	0	0	153		21022	S70_R	70	2015-10-30	0	0	70
1617	S153	153	2014-06-05	0	0	153		21023	S70_R	70	2015-10-31	0	0	70
1618	S153	153	2014-06-06	0	0	153		21024	S70_R	70	2015-11-01	0	0	70
1619	S153	153	2014-06-07	1.28	3.251	153		21025	S70_R	70	2015-11-02	0.01	0.0254	70
1620	S153	153	2014-06-08	0.09	0.229	153		21026	S70_R	70	2015-11-03	0	0	70
1621	S153	153	2014-06-09	0	0	153		21027	S70_R	70	2015-11-04	0	0	70
1622	S153	153	2014-06-10	0.15	0.381	153		21028	S70_R	70	2015-11-05	0	0	70
1623	S153	153	2014-06-11	0.37	0.94	153		21029	S70_R	70	2015-11-06	0	0	70
1624	S153	153	2014-06-12	3.28	8.331	153		21030	S70_R	70	2015-11-07	0	0	70
1625	S153	153	2014-06-13	0.04	0.102	153		21031	S70_R	70	2015-11-08	0	0	70
1626	S153	153	2014-06-14	0.46	1.168	153		21032	S70_R	70	2015-11-09	0.42	1.0668	70
1627	S153	153	2014-06-15	0.67	1.702	153		21033	S70_R	70	2015-11-10	1.25	3.175	70
1628	S153	153	2014-06-16	0.01	0.025	153		21034	S70_R	70	2015-11-11	0	0	70
1629	S153	153	2014-06-17	0.79	2.007	153		21035	S70_R	70	2015-11-12	0	0	70
1630	S153	153	2014-06-18	0.94	2.388	153		21036	S70_R	70	2015-11-13	0.16	0.4064	70
1631	S153	153	2014-06-19	0.01	0.025	153		21037	S70_R	70	2015-11-14	0	0	70
1632	S153	153	2014-06-20	0.01	0.025	153		21038	S70_R	70	2015-11-15	0	0	70
1633	S153	153	2014-06-21	0.01	0.025	153		21039	S70_R	70	2015-11-16	0	0	70
1634	S153	153	2014-06-22	0.17	0.432	153		21040	S70_R	70	2015-11-17	0	0	70
1635	S153	153	2014-06-23	0.05	0.127	153		21041	S70_R	70	2015-11-18	0.1	0.254	70
1636	S153	153	2014-06-24	0	0	153		21042	S70_R	70	2015-11-19	NA	0	70
1637	S153	153	2014-06-25	0	0	153		21043	S70_R	70	2015-11-20	NA	0	70
1638	S153	153	2014-06-26	0	0	153		21044	S70_R	70	2015-11-21	NA	0	70
1639	S153	153	2014-06-27	0.36	0.914	153		21045	S70_R	70	2015-11-22	NA	0	70
1640	S153	153	2014-06-28	0.01	0.025	153		21046	S70_R	70	2015-11-23	NA	0	70
1641	S153	153	2014-06-29	0.18	0.457	153		21047	S70_R	70	2015-11-24	NA	0	70
1642	S153	153	2014-06-30	0.27	0.686	153		21048	S70_R	70	2015-11-25	NA	0	70
1643	S153	153	2014-07-01	0.04	0.102	153		21049	S70_R	70	2015-11-26	0	0	70
1644	S153	153	2014-07-02	0.07	0.178	153		21050	S70_R	70	2015-11-27	NA	0	70
1645	S153	153	2014-07-03	0	0	153		21051	S70_R	70	2015-11-28	NA	0	70
1646	S153	153	2014-07-04	0.13	0.33	153		21052	S70_R	70	2015-11-29	0	0	70
1647	S153	153	2014-07-05	0.11	0.279	153		21053	S70_R	70	2015-11-30	NA	0	70
1648	S153	153	2014-07-06	0.52	1.321	153		23355	S80_R	80	2015-06-01	0	0	80
1649	S153	153	2014-07-07	0.36	0.914	153		23356	S80_R	80	2015-06-02	0.04	0.1016	80
1650	S153	153	2014-07-08	0.26	0.66	153		23357	S80_R	80	2015-06-03	0	0	80
1651	S153	153	2014-07-09	0.06	0.152	153		23358	S80_R	80	2015-06-04	0	0	80
1652	S153	153	2014-07-10	0.31	0.787	153		23359	S80_R	80	2015-06-05	0	0	80
1653	S153	153	2014-07-11	0	0	153		23360	S80_R	80	2015-06-06	0	0	80
1654	S153	153	2014-07-12	0.78	1.981	153		23361	S80_R	80	2015-06-07	0	0	80
1655	S153	153	2014-07-13	0.04	0.102	153		23362	S80_R	80	2015-06-08	0	0	80
1656	S153	153	2014-07-14	0.01	0.025	153		23363	S80_R	80	2015-06-09	0	0	80
1657	S153	153	2014-07-15	0.26	0.66	153		23364	S80_R	80	2015-06-10	1.33	3.3782	80
1658	S153	153	2014-07-16	0.11	0.279	153		23365	S80_R	80	2015-06-11	0	0	80
1659	S153	153	2014-07-17	0.06	0.152	153		23366	S80_R	80	2015-06-12	0	0	80
1660	S153	153	2014-07-18	0	0	153		23367	S80_R	80	2015-06-13	0	0	80
1661	S153	153	2014-07-19	0	0	153		23368	S80_R	80	2015-06-14	0.07	0.1778	80
1662	S153	153	2014-07-20	0	0	153		23369	S80_R	80	2015-06-15	0	0	80
1663	S153	153	2014-07-21	0	0	153		23370	S80_R	80	2015-06-16	0	0	80
1664	S153	153	2014-07-22	0.07	0.178	153		23371	S80_R	80	2015-06-17	0	0	80
1665	S153	153	2014-07-23	0.03	0.076	153		23372	S80_R	80	2015-06-18	0.01	0.0254	80
1666	S153	153	2014-07-24	0.01	0.025	153		23373	S80_R	80	2015-06-19	0	0	80
1667	S153	153	2014-07-25	0.16	0.406	153		23374	S80_R	80	2015-06-20	0	0	80
1668	S153	153	2014-07-26	0	0	153		23375	S80_R	80	2015-06-21	0	0	80
1669	S153	153	2014-07-27	0	0	153		23376	S80_R	80	2015-06-22	0	0	80
1670	S153	153	2014-07-28	0	0	153		23377	S80_R	80	2015-06-23	0.08	0.2032	80
1671	S153	153	2014-07-29	0.02	0.051	153		23378	S80_R	80	2015-06-24	0	0	80
1672	S153	153	2014-07-30	0	0	153		23379	S80_R	80	2015-06-25	0.33	0.8382	80
1673	S153	153	2014-07-31	0.01	0.025	153		23380	S80_R	80	2015-06-26	0.12	0.3048	80
1674	S153	153	2014-08-01	0.01	0.025	153		23381	S80_R	80	2015-06-27	0.02	0.0508	80
1675	S153	153	2014-08-02	0.03	0.076	153		23382	S80_R	80	2015-06-28	0	0	80
1676	S153	153	2014-08-03	0.02	0.051	153		23383	S80_R	80	2015-06-29	0.12	0.3048	80
1677	S153	153	2014-08-04	0.16	0.406	153		23384	S80_R	80	2015-06-30	0.17	0.4318	80
1678	S153	153	2014-08-05	0.01	0.025	153		23385	S80_R	80	2015-07-01	0	0	80
1679	S153	153	2014-08-06	0.03	0.076	153		23386	S80_R	80	2015-07-02	0.01	0.0254	80
1680	S153	153	2014-08-07	0.23	0.584	153		23387	S80_R	80	2015-07-03	0.48	1.2192	80
1681	S153	153	2014-08-08	0.01	0.025	153		23388	S80_R	80	2015-07-04	0	0	80
1682	S153	153	2014-08-09	0	0	153		23389	S80_R	80	2015-07-05	0.1	0.254	80
1683	S153	153	2014-08-10	0	0	153		23390	S80_R	80	2015-07-06	0	0	80
1684	S153	153	2014-08-11	0	0	153		23391	S80_R	80	2015-07-07	0.81	2.0574	80
1685	S153	153	2014-08-12	0	0	153		23392	S80_R	80	2015-07-08	0.01	0.0254	80
1686	S153	153	2014-08-13	0	0	153		23393	S80_R	80	2015-07-09	0	0	80
1687	S153	153	2014-08-14	0.37	0.94	153		23394	S80_R	80	2015-07-10	0	0	80
1688	S153	153	2014-08-15	0.18	0.457	153		23395	S80_R	80	2015-07-11	0	0	80
1689	S153	153	2014-08-16	0.03	0.076	153		23396	S80_R	80	2015-07-12	0	0	80
1690	S153	153	2014-08-17	0.01	0.025	153		23397	S80_R	80	2015-07-13	0	0	80
1691	S153	153	2014-08-18	0	0	153		23398	S80_R	80	2015-07-14	0.18	0.4572	80
1692	S153	153	2014-08-19	0	0	153		23399	S80_R	80	2015-07-15	0.31	0.7874	80
1693	S153	153	2014-08-20	0	0	153		23400	S80_R	80	2015-07-16	0.77	1.9558	80
1694	S153	153	2014-08-21	0	0	153		23401	S80_R	80	2015-07-17	0	0	80
1695	S153	153	2014-08-22	0.07	0.178	153		23402	S80_R	80	2015-07-18	0.4	1.016	80
1696	S153	153	2014-08-23	0	0	153		23403	S80_R	80	2015-07-19	0	0	80
1697	S153	153	2014-08-24	0	0	153		23404	S80_R	80	2015-07-20	0.06	0.1524	80
1698	S153	153	2014-08-25	0.16	0.406	153		23405	S80_R	80	2015-07-21	0.09	0.2286	80
1699	S153	153	2014-08-26	0	0	153		23406	S80_R	80	2015-07-22	0	0	80
1700	S153	153	2014-08-27	0	0	153		23407	S80_R	80	2015-07-23	1.29	3.2766	80
1701	S153	153	2014-08-28	0	0	153		23408	S80_R	80	2015-07-24	0.14	0.3556	80
1702	S153	153	2014-08-29	0	0	153		23409	S80_R	80	2015-07-25	0.05	0.127	80
1703	S153	153	2014-08-30	0	0	153		23410	S80_R	80	2015-07-26	0.22	0.5588	80
1704	S153	153	2014-08-31	0	0	153		23411	S80_R	80	2015-07-27	0	0	80
1705	S153	153	2014-09-01	0	0	153		23412	S80_R	80	2015-07-28	0	0	80
1706	S153	153	2014-09-02	0.91	2.311	153		23413	S80_R	80	2015-07-29	0.19	0.4826	80
1707	S153	153	2014-09-03	0.21	0.533	153		23414	S80_R	80	2015-07-30	0.77	1.9558	80
1708	S153	153	2014-09-04	0.12	0.305	153		23415	S80_R	80	2015-07-31	0.77	1.9558	80
1709	S153	153	2014-09-05	0.3	0.762	153		23416	S80_R	80	2015-08-01	0.6	1.524	80
1710	S153	153	2014-09-06	0.01	0.025	153		23417	S80_R	80	2015-08-02	0.9	2.286	80
1711	S153	153	2014-09-07	0.01	0.025	153		23418	S80_R	80	2015-08-03	0.03	0.0762	80
1712	S153	153	2014-09-08	0.05	0.127	153		23419	S80_R	80	2015-08-04	0	0	80
1713	S153	153	2014-09-09	0.06	0.152	153		23420	S80_R	80	2015-08-05	0.35	0.889	80
1714	S153	153	2014-09-10	0	0	153		23421	S80_R	80	2015-08-06	0	0	80
1715	S153	153	2014-09-11	0.56	1.422	153		23422	S80_R	80	2015-08-07	0	0	80
1716	S153	153	2014-09-12	0.04	0.102	153		23423	S80_R	80	2015-08-08	0	0	80
1717	S153	153	2014-09-13	0.07	0.178	153		23424	S80_R	80	2015-08-09	0	0	80
1718	S153	153	2014-09-14	0.04	0.102	153		23425	S80_R	80	2015-08-10	0.06	0.1524	80
1719	S153	153	2014-09-15	0	0	153		23426	S80_R	80	2015-08-11	0.25	0.635	80
1720	S153	153	2014-09-16	0	0	153		23427	S80_R	80	2015-08-12	0	0	80
1721	S153	153	2014-09-17	0.04	0.102	153		23428	S80_R	80	2015-08-13	0.16	0.4064	80
1722	S153	153	2014-09-18	0	0	153		23429	S80_R	80	2015-08-14	0.07	0.1778	80
1723	S153	153	2014-09-19	0.92	2.337	153		23430	S80_R	80	2015-08-15	0.13	0.3302	80
1724	S153	153	2014-09-20	0.65	1.651	153		23431	S80_R	80	2015-08-16	0	0	80
1725	S153	153	2014-09-21	0	0	153		23432	S80_R	80	2015-08-17	0	0	80
1726	S153	153	2014-09-22	0.23	0.584	153		23433	S80_R	80	2015-08-18	0	0	80
1727	S153	153	2014-09-23	0.08	0.203	153		23434	S80_R	80	2015-08-19	0	0	80
1728	S153	153	2014-09-24	0	0	153		23435	S80_R	80	2015-08-20	0	0	80
1729	S153	153	2014-09-25	1.26	3.2	153		23436	S80_R	80	2015-08-21	0.36	0.9144	80
1730	S153	153	2014-09-26	0	0	153		23437	S80_R	80	2015-08-22	0	0	80
1731	S153	153	2014-09-27	0	0	153		23438	S80_R	80	2015-08-23	0	0	80
1732	S153	153	2014-09-28	0	0	153		23439	S80_R	80	2015-08-24	0	0	80
1733	S153	153	2014-09-29	0	0	153		23440	S80_R	80	2015-08-25	0.27	0.6858	80
1734	S153	153	2014-09-30	0	0	153		23441	S80_R	80	2015-08-26	0.23	0.5842	80
1735	S153	153	2014-10-01	0	0	153		23442	S80_R	80	2015-08-27	1.5	3.81	80
1736	S153	153	2014-10-02	0.03	0.076	153		23443	S80_R	80	2015-08-28	0.01	0.0254	80
1737	S153	153	2014-10-03	0.1	0.254	153		23444	S80_R	80	2015-08-29	0.76	1.9304	80
1738	S153	153	2014-10-04	0	0	153		23445	S80_R	80	2015-08-30	0.3	0.762	80
1739	S153	153	2014-10-05	0	0	153		23446	S80_R	80	2015-08-31	0	0	80
1740	S153	153	2014-10-06	0	0	153		23447	S80_R	80	2015-09-01	0.01	0.0254	80
1741	S153	153	2014-10-07	0	0	153		23448	S80_R	80	2015-09-02	0	0	80
1742	S153	153	2014-10-08	0	0	153		23449	S80_R	80	2015-09-03	0.16	0.4064	80
1743	S153	153	2014-10-09	0	0	153		23450	S80_R	80	2015-09-04	0.2	0.508	80
1744	S153	153	2014-10-10	0	0	153		23451	S80_R	80	2015-09-05	0.06	0.1524	80
1745	S153	153	2014-10-11	0	0	153		23452	S80_R	80	2015-09-06	0	0	80
1746	S153	153	2014-10-12	0	0	153		23453	S80_R	80	2015-09-07	0.13	0.3302	80
1747	S153	153	2014-10-13	0	0	153		23454	S80_R	80	2015-09-08	0.02	0.0508	80
1748	S153	153	2014-10-14	0.12	0.305	153		23455	S80_R	80	2015-09-09	0	0	80
1749	S153	153	2014-10-15	0.44	1.118	153		23456	S80_R	80	2015-09-10	0	0	80
1750	S153	153	2014-10-16	0	0	153		23457	S80_R	80	2015-09-11	1.5	3.81	80
1751	S153	153	2014-10-17	0	0	153		23458	S80_R	80	2015-09-12	0.01	0.0254	80
1752	S153	153	2014-10-18	0	0	153		23459	S80_R	80	2015-09-13	0	0	80
1753	S153	153	2014-10-19	0	0	153		23460	S80_R	80	2015-09-14	0	0	80
1754	S153	153	2014-10-20	0	0	153		23461	S80_R	80	2015-09-15	0.28	0.7112	80
1755	S153	153	2014-10-21	1.79	4.547	153		23462	S80_R	80	2015-09-16	1.73	4.3942	80
1756	S153	153	2014-10-22	0	0	153		23463	S80_R	80	2015-09-17	2.39	6.0706	80
1757	S153	153	2014-10-23	0	0	153		23464	S80_R	80	2015-09-18	0.45	1.143	80
1758	S153	153	2014-10-24	0	0	153		23465	S80_R	80	2015-09-19	0	0	80
1759	S153	153	2014-10-25	0	0	153		23466	S80_R	80	2015-09-20	0	0	80
1760	S153	153	2014-10-26	0	0	153		23467	S80_R	80	2015-09-21	0	0	80
1761	S153	153	2014-10-27	0	0	153		23468	S80_R	80	2015-09-22	0.01	0.0254	80
1762	S153	153	2014-10-28	0	0	153		23469	S80_R	80	2015-09-23	0	0	80
1763	S153	153	2014-10-29	0	0	153		23470	S80_R	80	2015-09-24	0	0	80
1764	S153	153	2014-10-30	0	0	153		23471	S80_R	80	2015-09-25	0	0	80
1765	S153	153	2014-10-31	0	0	153		23472	S80_R	80	2015-09-26	0	0	80
1766	S153	153	2014-11-01	0	0	153		23473	S80_R	80	2015-09-27	0	0	80
1767	S153	153	2014-11-02	0	0	153		23474	S80_R	80	2015-09-28	0.01	0.0254	80
1768	S153	153	2014-11-03	0	0	153		23475	S80_R	80	2015-09-29	0.03	0.0762	80
1769	S153	153	2014-11-04	0	0	153		23476	S80_R	80	2015-09-30	0	0	80
1770	S153	153	2014-11-05	0	0	153		23477	S80_R	80	2015-10-01	0	0	80
1771	S153	153	2014-11-06	0	0	153		23478	S80_R	80	2015-10-02	0	0	80
1772	S153	153	2014-11-07	0	0	153		23479	S80_R	80	2015-10-03	0	0	80
1773	S153	153	2014-11-08	0	0	153		23480	S80_R	80	2015-10-04	0.1	0.254	80
1774	S153	153	2014-11-09	0.58	1.473	153		23481	S80_R	80	2015-10-05	0.46	1.1684	80
1775	S153	153	2014-11-10	0.22	0.559	153		23482	S80_R	80	2015-10-06	0	0	80
1776	S153	153	2014-11-11	0	0	153		23483	S80_R	80	2015-10-07	0.12	0.3048	80
1777	S153	153	2014-11-12	0	0	153		23484	S80_R	80	2015-10-08	0.16	0.4064	80
1778	S153	153	2014-11-13	0	0	153		23485	S80_R	80	2015-10-09	0	0	80
1779	S153	153	2014-11-14	0	0	153		23486	S80_R	80	2015-10-10	0	0	80
1780	S153	153	2014-11-15	0	0	153		23487	S80_R	80	2015-10-11	0	0	80
1781	S153	153	2014-11-16	0	0	153		23488	S80_R	80	2015-10-12	0	0	80
1782	S153	153	2014-11-17	0.02	0.051	153		23489	S80_R	80	2015-10-13	0.08	0.2032	80
1783	S153	153	2014-11-18	0.09	0.229	153		23490	S80_R	80	2015-10-14	0	0	80
1784	S153	153	2014-11-19	0.01	0.025	153		23491	S80_R	80	2015-10-15	0	0	80
1785	S153	153	2014-11-20	0	0	153		23492	S80_R	80	2015-10-16	0.01	0.0254	80
1786	S153	153	2014-11-21	0.06	0.152	153		23493	S80_R	80	2015-10-17	0.96	2.4384	80
1787	S153	153	2014-11-22	0	0	153		23494	S80_R	80	2015-10-18	0	0	80
1788	S153	153	2014-11-23	0.02	0.051	153		23495	S80_R	80	2015-10-19	0	0	80
1789	S153	153	2014-11-24	0	0	153		23496	S80_R	80	2015-10-20	0.01	0.0254	80
1790	S153	153	2014-11-25	0	0	153		23497	S80_R	80	2015-10-21	0.04	0.1016	80
1791	S153	153	2014-11-26	0.49	1.245	153		23498	S80_R	80	2015-10-22	0.28	0.7112	80
1792	S153	153	2014-11-27	0.01	0.025	153		23499	S80_R	80	2015-10-23	0.07	0.1778	80
1793	S153	153	2014-11-28	0	0	153		23500	S80_R	80	2015-10-24	0	0	80
1794	S153	153	2014-11-29	0	0	153		23501	S80_R	80	2015-10-25	0	0	80
1795	S153	153	2014-11-30	0	0	153		23502	S80_R	80	2015-10-26	0	0	80
1796	S153	153	2014-12-01	0	0	153		23503	S80_R	80	2015-10-27	0	0	80
1797	S153	153	2014-12-02	0	0	153		23504	S80_R	80	2015-10-28	0	0	80
1798	S153	153	2014-12-03	0	0	153		23505	S80_R	80	2015-10-29	0	0	80
1799	S153	153	2014-12-04	0.17	0.432	153		23506	S80_R	80	2015-10-30	0	0	80
1800	S153	153	2014-12-05	0.01	0.025	153		23507	S80_R	80	2015-10-31	0	0	80
1801	S153	153	2014-12-06	0.01	0.025	153		23508	S80_R	80	2015-11-01	0	0	80
1802	S153	153	2014-12-07	0	0	153		23509	S80_R	80	2015-11-02	0	0	80
1803	S153	153	2014-12-08	0.01	0.025	153		23510	S80_R	80	2015-11-03	0	0	80
1804	S153	153	2014-12-09	0	0	153		23511	S80_R	80	2015-11-04	0	0	80
1805	S153	153	2014-12-10	0	0	153		23512	S80_R	80	2015-11-05	0	0	80
1806	S153	153	2014-12-11	0	0	153		23513	S80_R	80	2015-11-06	0	0	80
1807	S153	153	2014-12-12	0	0	153		23514	S80_R	80	2015-11-07	0	0	80
1808	S153	153	2014-12-13	0	0	153		23515	S80_R	80	2015-11-08	0	0	80
1809	S153	153	2014-12-14	0	0	153		23516	S80_R	80	2015-11-09	0	0	80
1810	S153	153	2014-12-15	0	0	153		23517	S80_R	80	2015-11-10	0	0	80
1811	S153	153	2014-12-16	0	0	153		23518	S80_R	80	2015-11-11	0	0	80
1812	S153	153	2014-12-17	0	0	153		23519	S80_R	80	2015-11-12	0	0	80
1813	S153	153	2014-12-18	0	0	153		23520	S80_R	80	2015-11-13	0.96	2.4384	80
1814	S153	153	2014-12-19	0	0	153		23521	S80_R	80	2015-11-14	0	0	80
1815	S153	153	2014-12-20	0	0	153		23522	S80_R	80	2015-11-15	0	0	80
1816	S153	153	2014-12-21	0	0	153		23523	S80_R	80	2015-11-16	0.11	0.2794	80
1817	S153	153	2014-12-22	0	0	153		23524	S80_R	80	2015-11-17	0.28	0.7112	80
1818	S153	153	2014-12-23	0	0	153		23525	S80_R	80	2015-11-18	0.05	0.127	80
1819	S153	153	2014-12-24	0	0	153		23526	S80_R	80	2015-11-19	0	0	80
1820	S153	153	2014-12-25	0.28	0.711	153		23527	S80_R	80	2015-11-20	0	0	80
1821	S153	153	2014-12-26	0.02	0.051	153		23528	S80_R	80	2015-11-21	0.19	0.4826	80
1822	S153	153	2014-12-27	0.01	0.025	153		23529	S80_R	80	2015-11-22	0.16	0.4064	80
1823	S153	153	2014-12-28	0	0	153		23530	S80_R	80	2015-11-23	0.01	0.0254	80
1824	S153	153	2014-12-29	0	0	153		23531	S80_R	80	2015-11-24	0	0	80
1825	S153	153	2014-12-30	0	0	153		23532	S80_R	80	2015-11-25	0.55	1.397	80
1826	S153	153	2014-12-31	0.1	0.254	153		23533	S80_R	80	2015-11-26	0.18	0.4572	80
1827	S153	153	2015-01-01	0.07	0.178	153		23534	S80_R	80	2015-11-27	0.08	0.2032	80
1828	S153	153	2015-01-02	0	0	153		23535	S80_R	80	2015-11-28	0	0	80
1829	S153	153	2015-01-03	0	0	153		23536	S80_R	80	2015-11-29	0.01	0.0254	80
1830	S153	153	2015-01-04	0.5	1.27	153		23537	S80_R	80	2015-11-30	0	0	80
1831	S153	153	2015-01-05	0	0	153		25839	S75_R	75	2015-06-01	0.41	1.0414	75
1832	S153	153	2015-01-06	0.01	0.025	153		25840	S75_R	75	2015-06-02	0.16	0.4064	75
1833	S153	153	2015-01-07	0	0	153		25841	S75_R	75	2015-06-03	0.14	0.3556	75
1834	S153	153	2015-01-08	0	0	153		25842	S75_R	75	2015-06-04	0	0	75
1835	S153	153	2015-01-09	0	0	153		25843	S75_R	75	2015-06-05	0	0	75
1836	S153	153	2015-01-10	0	0	153		25844	S75_R	75	2015-06-06	1.77	4.4958	75
1837	S153	153	2015-01-11	0	0	153		25845	S75_R	75	2015-06-07	0	0	75
1838	S153	153	2015-01-12	0.2	0.508	153		25846	S75_R	75	2015-06-08	0	0	75
1839	S153	153	2015-01-13	0.01	0.025	153		25847	S75_R	75	2015-06-09	0.41	1.0414	75
1840	S153	153	2015-01-14	0	0	153		25848	S75_R	75	2015-06-10	1.23	3.1242	75
1841	S153	153	2015-01-15	0	0	153		25849	S75_R	75	2015-06-11	0.01	0.0254	75
1842	S153	153	2015-01-16	0.06	0.152	153		25850	S75_R	75	2015-06-12	NA	0	75
1843	S153	153	2015-01-17	0	0	153		25851	S75_R	75	2015-06-13	NA	0	75
1844	S153	153	2015-01-18	0	0	153		25852	S75_R	75	2015-06-14	NA	0	75
1845	S153	153	2015-01-19	0	0	153		25853	S75_R	75	2015-06-15	NA	0	75
1846	S153	153	2015-01-20	0	0	153		25854	S75_R	75	2015-06-16	NA	0	75
1847	S153	153	2015-01-21	0	0	153		25855	S75_R	75	2015-06-17	NA	0	75
1848	S153	153	2015-01-22	0	0	153		25856	S75_R	75	2015-06-18	NA	0	75
1849	S153	153	2015-01-23	0	0	153		25857	S75_R	75	2015-06-19	NA	0	75
1850	S153	153	2015-01-24	0	0	153		25858	S75_R	75	2015-06-20	NA	0	75
1851	S153	153	2015-01-25	0	0	153		25859	S75_R	75	2015-06-21	NA	0	75
1852	S153	153	2015-01-26	0	0	153		25860	S75_R	75	2015-06-22	NA	0	75
1853	S153	153	2015-01-27	0	0	153		25861	S75_R	75	2015-06-23	NA	0	75
1854	S153	153	2015-01-28	0	0	153		25862	S75_R	75	2015-06-24	0	0	75
1855	S153	153	2015-01-29	0	0	153		25863	S75_R	75	2015-06-25	0.29	0.7366	75
1856	S153	153	2015-01-30	0	0	153		25864	S75_R	75	2015-06-26	0	0	75
1857	S153	153	2015-01-31	0	0	153		25865	S75_R	75	2015-06-27	0	0	75
1858	S153	153	2015-02-01	0	0	153		25866	S75_R	75	2015-06-28	0	0	75
1859	S153	153	2015-02-02	0	0	153		25867	S75_R	75	2015-06-29	0.49	1.2446	75
1860	S153	153	2015-02-03	0	0	153		25868	S75_R	75	2015-06-30	0.87	2.2098	75
1861	S153	153	2015-02-04	0	0	153		25869	S75_R	75	2015-07-01	0	0	75
1862	S153	153	2015-02-05	1.18	2.997	153		25870	S75_R	75	2015-07-02	0	0	75
1863	S153	153	2015-02-06	0	0	153		25871	S75_R	75	2015-07-03	0.01	0.0254	75
1864	S153	153	2015-02-07	0	0	153		25872	S75_R	75	2015-07-04	0	0	75
1865	S153	153	2015-02-08	0	0	153		25873	S75_R	75	2015-07-05	0.82	2.0828	75
1866	S153	153	2015-02-09	0.98	2.489	153		25874	S75_R	75	2015-07-06	0.01	0.0254	75
1867	S153	153	2015-02-10	0	0	153		25875	S75_R	75	2015-07-07	0.06	0.1524	75
1868	S153	153	2015-02-11	0	0	153		25876	S75_R	75	2015-07-08	0.01	0.0254	75
1869	S153	153	2015-02-12	0	0	153		25877	S75_R	75	2015-07-09	0.02	0.0508	75
1870	S153	153	2015-02-13	0	0	153		25878	S75_R	75	2015-07-10	0.01	0.0254	75
1871	S153	153	2015-02-14	0	0	153		25879	S75_R	75	2015-07-11	0	0	75
1872	S153	153	2015-02-15	0	0	153		25880	S75_R	75	2015-07-12	0	0	75
1873	S153	153	2015-02-16	0	0	153		25881	S75_R	75	2015-07-13	0.68	1.7272	75
1874	S153	153	2015-02-17	0	0	153		25882	S75_R	75	2015-07-14	0.03	0.0762	75
1875	S153	153	2015-02-18	0.13	0.33	153		25883	S75_R	75	2015-07-15	0.43	1.0922	75
1876	S153	153	2015-02-19	0	0	153		25884	S75_R	75	2015-07-16	0.51	1.2954	75
1877	S153	153	2015-02-20	0	0	153		25885	S75_R	75	2015-07-17	0.01	0.0254	75
1878	S153	153	2015-02-21	0	0	153		25886	S75_R	75	2015-07-18	0	0	75
1879	S153	153	2015-02-22	0	0	153		25887	S75_R	75	2015-07-19	0.08	0.2032	75
1880	S153	153	2015-02-23	0	0	153		25888	S75_R	75	2015-07-20	0	0	75
1881	S153	153	2015-02-24	0	0	153		25889	S75_R	75	2015-07-21	0	0	75
1882	S153	153	2015-02-25	0	0	153		25890	S75_R	75	2015-07-22	0.36	0.9144	75
1883	S153	153	2015-02-26	0	0	153		25891	S75_R	75	2015-07-23	0.54	1.3716	75
1884	S153	153	2015-02-27	0	0	153		25892	S75_R	75	2015-07-24	0.3	0.762	75
1885	S153	153	2015-02-28	0.01	0.025	153		25893	S75_R	75	2015-07-25	0	0	75
1886	S153	153	2015-03-01	0.01	0.025	153		25894	S75_R	75	2015-07-26	0.02	0.0508	75
1887	S153	153	2015-03-02	0	0	153		25895	S75_R	75	2015-07-27	0.3	0.762	75
1888	S153	153	2015-03-03	0	0	153		25896	S75_R	75	2015-07-28	0	0	75
1889	S153	153	2015-03-04	0	0	153		25897	S75_R	75	2015-07-29	0.28	0.7112	75
1890	S153	153	2015-03-05	0	0	153		25898	S75_R	75	2015-07-30	0.07	0.1778	75
1891	S153	153	2015-03-06	0	0	153		25899	S75_R	75	2015-07-31	0.03	0.0762	75
1892	S153	153	2015-03-07	0	0	153		25900	S75_R	75	2015-08-01	0.78	1.9812	75
1893	S153	153	2015-03-08	0	0	153		25901	S75_R	75	2015-08-02	0.01	0.0254	75
1894	S153	153	2015-03-09	0	0	153		25902	S75_R	75	2015-08-03	0	0	75
1895	S153	153	2015-03-10	0	0	153		25903	S75_R	75	2015-08-04	0	0	75
1896	S153	153	2015-03-11	0	0	153		25904	S75_R	75	2015-08-05	0	0	75
1897	S153	153	2015-03-12	0	0	153		25905	S75_R	75	2015-08-06	0	0	75
1898	S153	153	2015-03-13	0	0	153		25906	S75_R	75	2015-08-07	0	0	75
1899	S153	153	2015-03-14	0	0	153		25907	S75_R	75	2015-08-08	0.17	0.4318	75
1900	S153	153	2015-03-15	0	0	153		25908	S75_R	75	2015-08-09	0	0	75
1901	S153	153	2015-03-16	0	0	153		25909	S75_R	75	2015-08-10	0	0	75
1902	S153	153	2015-03-17	0	0	153		25910	S75_R	75	2015-08-11	0	0	75
1903	S153	153	2015-03-18	0	0	153		25911	S75_R	75	2015-08-12	0	0	75
1904	S153	153	2015-03-19	0	0	153		25912	S75_R	75	2015-08-13	1.14	2.8956	75
1905	S153	153	2015-03-20	0	0	153		25913	S75_R	75	2015-08-14	0.23	0.5842	75
1906	S153	153	2015-03-21	0	0	153		25914	S75_R	75	2015-08-15	0.67	1.7018	75
1907	S153	153	2015-03-22	0	0	153		25915	S75_R	75	2015-08-16	0.01	0.0254	75
1908	S153	153	2015-03-23	0.02	0.051	153		25916	S75_R	75	2015-08-17	0	0	75
1909	S153	153	2015-03-24	0.01	0.025	153		25917	S75_R	75	2015-08-18	0	0	75
1910	S153	153	2015-03-25	0	0	153		25918	S75_R	75	2015-08-19	0.21	0.5334	75
1911	S153	153	2015-03-26	0.28	0.711	153		25919	S75_R	75	2015-08-20	0.01	0.0254	75
1912	S153	153	2015-03-27	0.32	0.813	153		25920	S75_R	75	2015-08-21	0.04	0.1016	75
1913	S153	153	2015-03-28	0	0	153		25921	S75_R	75	2015-08-22	0.01	0.0254	75
1914	S153	153	2015-03-29	0	0	153		25922	S75_R	75	2015-08-23	0	0	75
1915	S153	153	2015-03-30	0	0	153		25923	S75_R	75	2015-08-24	0	0	75
1916	S153	153	2015-03-31	0	0	153		25924	S75_R	75	2015-08-25	0	0	75
1917	S153	153	2015-04-01	0	0	153		25925	S75_R	75	2015-08-26	0.5	1.27	75
1918	S153	153	2015-04-02	0	0	153		25926	S75_R	75	2015-08-27	0.3	0.762	75
1919	S153	153	2015-04-03	0	0	153		25927	S75_R	75	2015-08-28	1.04	2.6416	75
1920	S153	153	2015-04-04	0	0	153		25928	S75_R	75	2015-08-29	0.33	0.8382	75
1921	S153	153	2015-04-05	2.49	6.325	153		25929	S75_R	75	2015-08-30	0.15	0.381	75
1922	S153	153	2015-04-06	0	0	153		25930	S75_R	75	2015-08-31	0.36	0.9144	75
1923	S153	153	2015-04-07	0	0	153		25931	S75_R	75	2015-09-01	0.01	0.0254	75
1924	S153	153	2015-04-08	0	0	153		25932	S75_R	75	2015-09-02	0	0	75
1925	S153	153	2015-04-09	0	0	153		25933	S75_R	75	2015-09-03	0	0	75
1926	S153	153	2015-04-10	1	2.54	153		25934	S75_R	75	2015-09-04	0.1	0.254	75
1927	S153	153	2015-04-11	0.03	0.076	153		25935	S75_R	75	2015-09-05	1.51	3.8354	75
1928	S153	153	2015-04-12	0	0	153		25936	S75_R	75	2015-09-06	0.76	1.9304	75
1929	S153	153	2015-04-13	0.01	0.025	153		25937	S75_R	75	2015-09-07	0.03	0.0762	75
1930	S153	153	2015-04-14	0.19	0.483	153		25938	S75_R	75	2015-09-08	0	0	75
1931	S153	153	2015-04-15	0.13	0.33	153		25939	S75_R	75	2015-09-09	0.02	0.0508	75
1932	S153	153	2015-04-16	0	0	153		25940	S75_R	75	2015-09-10	0.01	0.0254	75
1933	S153	153	2015-04-17	0.43	1.092	153		25941	S75_R	75	2015-09-11	0.18	0.4572	75
1934	S153	153	2015-04-18	0	0	153		25942	S75_R	75	2015-09-12	0.03	0.0762	75
1935	S153	153	2015-04-19	0.03	0.076	153		25943	S75_R	75	2015-09-13	0.19	0.4826	75
1936	S153	153	2015-04-20	0	0	153		25944	S75_R	75	2015-09-14	0.08	0.2032	75
1937	S153	153	2015-04-21	0.01	0.025	153		25945	S75_R	75	2015-09-15	0.11	0.2794	75
1938	S153	153	2015-04-22	0.03	0.076	153		25946	S75_R	75	2015-09-16	0	0	75
1939	S153	153	2015-04-23	0.14	0.356	153		25947	S75_R	75	2015-09-17	1.87	4.7498	75
1940	S153	153	2015-04-24	0	0	153		25948	S75_R	75	2015-09-18	0	0	75
1941	S153	153	2015-04-25	0	0	153		25949	S75_R	75	2015-09-19	0.01	0.0254	75
1942	S153	153	2015-04-26	0	0	153		25950	S75_R	75	2015-09-20	0	0	75
1943	S153	153	2015-04-27	0	0	153		25951	S75_R	75	2015-09-21	0	0	75
1944	S153	153	2015-04-28	0.56	1.422	153		25952	S75_R	75	2015-09-22	0	0	75
1945	S153	153	2015-04-29	0.33	0.838	153		25953	S75_R	75	2015-09-23	0	0	75
1946	S153	153	2015-04-30	0	0	153		25954	S75_R	75	2015-09-24	0	0	75
1947	S153	153	2015-05-01	0	0	153		25955	S75_R	75	2015-09-25	0.18	0.4572	75
1948	S153	153	2015-05-02	0	0	153		25956	S75_R	75	2015-09-26	0	0	75
1949	S153	153	2015-05-03	0	0	153		25957	S75_R	75	2015-09-27	0	0	75
1950	S153	153	2015-05-04	0	0	153		25958	S75_R	75	2015-09-28	0.38	0.9652	75
1951	S153	153	2015-05-05	0.02	0.051	153		25959	S75_R	75	2015-09-29	0.42	1.0668	75
1952	S153	153	2015-05-06	0	0	153		25960	S75_R	75	2015-09-30	0.01	0.0254	75
1953	S153	153	2015-05-07	0	0	153		25961	S75_R	75	2015-10-01	0	0	75
1954	S153	153	2015-05-08	0	0	153		25962	S75_R	75	2015-10-02	0	0	75
1955	S153	153	2015-05-09	0	0	153		25963	S75_R	75	2015-10-03	0	0	75
1956	S153	153	2015-05-10	0	0	153		25964	S75_R	75	2015-10-04	0.21	0.5334	75
1957	S153	153	2015-05-11	0	0	153		25965	S75_R	75	2015-10-05	0.01	0.0254	75
1958	S153	153	2015-05-12	0.06	0.152	153		25966	S75_R	75	2015-10-06	0.01	0.0254	75
1959	S153	153	2015-05-13	0	0	153		25967	S75_R	75	2015-10-07	0	0	75
1960	S153	153	2015-05-14	0	0	153		25968	S75_R	75	2015-10-08	0	0	75
1961	S153	153	2015-05-15	0	0	153		25969	S75_R	75	2015-10-09	0.01	0.0254	75
1962	S153	153	2015-05-16	0.03	0.076	153		25970	S75_R	75	2015-10-10	0.53	1.3462	75
1963	S153	153	2015-05-17	0	0	153		25971	S75_R	75	2015-10-11	0.09	0.2286	75
1964	S153	153	2015-05-18	0	0	153		25972	S75_R	75	2015-10-12	0	0	75
1965	S153	153	2015-05-19	0	0	153		25973	S75_R	75	2015-10-13	0	0	75
1966	S153	153	2015-05-20	0	0	153		25974	S75_R	75	2015-10-14	0	0	75
1967	S153	153	2015-05-21	0.21	0.533	153		25975	S75_R	75	2015-10-15	0	0	75
1968	S153	153	2015-05-22	0.01	0.025	153		25976	S75_R	75	2015-10-16	0	0	75
1969	S153	153	2015-05-23	0.26	0.66	153		25977	S75_R	75	2015-10-17	0	0	75
1970	S153	153	2015-05-24	0	0	153		25978	S75_R	75	2015-10-18	0.01	0.0254	75
1971	S153	153	2015-05-25	0	0	153		25979	S75_R	75	2015-10-19	0	0	75
1972	S153	153	2015-05-26	0	0	153		25980	S75_R	75	2015-10-20	0	0	75
1973	S153	153	2015-05-27	0	0	153		25981	S75_R	75	2015-10-21	0.04	0.1016	75
1974	S153	153	2015-05-28	0	0	153		25982	S75_R	75	2015-10-22	0	0	75
1975	S153	153	2015-05-29	0.05	0.127	153		25983	S75_R	75	2015-10-23	0.05	0.127	75
1976	S153	153	2015-05-30	0	0	153		25984	S75_R	75	2015-10-24	0	0	75
1977	S153	153	2015-05-31	0	0	153		25985	S75_R	75	2015-10-25	0	0	75
1978	S153	153	2015-06-01	0	0	153
1979	S153	153	2015-06-02	0.19	0.483	153
1980	S153	153	2015-06-03	0.17	0.432	153
1981	S153	153	2015-06-04	1.15	2.921	153
1982	S153	153	2015-06-05	0	0	153
1983	S153	153	2015-06-06	0.33	0.838	153
1984	S153	153	2015-06-07	0.31	0.787	153
1985	S153	153	2015-06-08	0.41	1.041	153
1986	S153	153	2015-06-09	0.18	0.457	153
1987	S153	153	2015-06-10	2.12	5.385	153
1988	S153	153	2015-06-11	0	0	153
1989	S153	153	2015-06-12	0	0	153
1990	S153	153	2015-06-13	0	0	153
1991	S153	153	2015-06-14	0	0	153
1992	S153	153	2015-06-15	0	0	153
1993	S153	153	2015-06-16	0	0	153
1994	S153	153	2015-06-17	0	0	153
1995	S153	153	2015-06-18	0.49	1.245	153
1996	S153	153	2015-06-19	0	0	153
1997	S153	153	2015-06-20	0.84	2.134	153
1998	S153	153	2015-06-21	0.03	0.076	153
1999	S153	153	2015-06-22	0.08	0.203	153
[truncated: 53,771 more rows]

## Sheet: Subset June November
ID	station	station_clean	daily_date	data_value_in	ata_value_cm	station_clean_2
2070	S153	153	2015-09-01	0.13	0.33	153
4506	S46	46	2015-09-01	0	0	46
6942	S49	49	2015-09-01	0.02	0.051	49
8770	S386B_R	386	2015-09-01	0.01	0.0254	386
11206	S154_R	154	2015-09-01	0	0	154
13622	S386B_R	386	2015-09-01	0.01	0.0254	386
16106	S70_R	70	2015-09-01	0.57	1.4478	70
18590	S70_R	70	2015-09-01	0	0	70
20963	S70_R	70	2015-09-01	0	0	70
23447	S80_R	80	2015-09-01	0.01	0.0254	80
25931	S75_R	75	2015-09-01	0.01	0.0254	75
28415	S72_R	72	2015-09-01	0.01	0.0254	72
30851	S75_R	75	2015-09-01	0.01	0.0254	75
33287	S84	84	2015-09-01	0	0	84
35771	S97_R	97	2015-09-01	0.1	0.254	97
38255	S84_R	84	2015-09-01	0	0	84
40691	S97_R	97	2015-09-01	0.01	0.0254	97
43127	S153_R	153	2015-09-01	0.22	0.5588	153
45612	S153_R	153	2015-09-01	0.13	0.3302	153
48096	S153_R	153	2015-09-01	0.13	0.3302	153
50532	S153	153	2015-09-01	0.13	0.3302	153
52968	S46	46	2015-09-01	0	0	46
55404	S49	49	2015-09-01	0.02	0.0508	49
2071	S153	153	2015-09-02	0	0	153
4507	S46	46	2015-09-02	0	0	46
6943	S49	49	2015-09-02	0	0	49
8771	S386B_R	386	2015-09-02	0	0	386
11207	S154_R	154	2015-09-02	0	0	154
13623	S386B_R	386	2015-09-02	0	0	386
16107	S70_R	70	2015-09-02	0	0	70
18591	S70_R	70	2015-09-02	0	0	70
20964	S70_R	70	2015-09-02	0	0	70
23448	S80_R	80	2015-09-02	0	0	80
25932	S75_R	75	2015-09-02	0	0	75
28416	S72_R	72	2015-09-02	0	0	72
30852	S75_R	75	2015-09-02	0	0	75
33288	S84	84	2015-09-02	0	0	84
35772	S97_R	97	2015-09-02	0.01	0.0254	97
38256	S84_R	84	2015-09-02	0	0	84
40692	S97_R	97	2015-09-02	0	0	97
43128	S153_R	153	2015-09-02	0.12	0.3048	153
45613	S153_R	153	2015-09-02	0	0	153
48097	S153_R	153	2015-09-02	0	0	153
50533	S153	153	2015-09-02	0	0	153
52969	S46	46	2015-09-02	0	0	46
55405	S49	49	2015-09-02	0	0	49
2072	S153	153	2015-09-03	0	0	153
4508	S46	46	2015-09-03	0.16	0.406	46
6944	S49	49	2015-09-03	0.34	0.864	49
8772	S386B_R	386	2015-09-03	0	0	386
11208	S154_R	154	2015-09-03	0	0	154
13624	S386B_R	386	2015-09-03	0	0	386
16108	S70_R	70	2015-09-03	0	0	70
18592	S70_R	70	2015-09-03	0.23	0.5842	70
20965	S70_R	70	2015-09-03	0.23	0.5842	70
23449	S80_R	80	2015-09-03	0.16	0.4064	80
25933	S75_R	75	2015-09-03	0	0	75
28417	S72_R	72	2015-09-03	0	0	72
30853	S75_R	75	2015-09-03	0	0	75
33289	S84	84	2015-09-03	0	0	84
35773	S97_R	97	2015-09-03	0	0	97
38257	S84_R	84	2015-09-03	0	0	84
40693	S97_R	97	2015-09-03	0	0	97
43129	S153_R	153	2015-09-03	0	0	153
45614	S153_R	153	2015-09-03	0	0	153
48098	S153_R	153	2015-09-03	0	0	153
50534	S153	153	2015-09-03	0	0	153
52970	S46	46	2015-09-03	0.16	0.4064	46
55406	S49	49	2015-09-03	0.34	0.8636	49
2073	S153	153	2015-09-04	0	0	153
4509	S46	46	2015-09-04	0.37	0.94	46
6945	S49	49	2015-09-04	0.01	0.025	49
8773	S386B_R	386	2015-09-04	0	0	386
11209	S154_R	154	2015-09-04	0.04	0.1016	154
13625	S386B_R	386	2015-09-04	0	0	386
16109	S70_R	70	2015-09-04	0.24	0.6096	70
18593	S70_R	70	2015-09-04	0.28	0.7112	70
20966	S70_R	70	2015-09-04	0.28	0.7112	70
23450	S80_R	80	2015-09-04	0.2	0.508	80
25934	S75_R	75	2015-09-04	0.1	0.254	75
28418	S72_R	72	2015-09-04	0.07	0.1778	72
30854	S75_R	75	2015-09-04	0.1	0.254	75
33290	S84	84	2015-09-04	0	0	84
35774	S97_R	97	2015-09-04	0	0	97
38258	S84_R	84	2015-09-04	0.03	0.0762	84
40694	S97_R	97	2015-09-04	0.62	1.5748	97
43130	S153_R	153	2015-09-04	0	0	153
45615	S153_R	153	2015-09-04	0	0	153
48099	S153_R	153	2015-09-04	0	0	153
50535	S153	153	2015-09-04	0	0	153
52971	S46	46	2015-09-04	0.37	0.9398	46
55407	S49	49	2015-09-04	0.01	0.0254	49
2074	S153	153	2015-09-05	0.84	2.134	153
4510	S46	46	2015-09-05	1.74	4.42	46
6946	S49	49	2015-09-05	0.34	0.864	49
8774	S386B_R	386	2015-09-05	1.76	4.4704	386
11210	S154_R	154	2015-09-05	1	2.54	154
13626	S386B_R	386	2015-09-05	1.76	4.4704	386
16110	S70_R	70	2015-09-05	0.28	0.7112	70
18594	S70_R	70	2015-09-05	0.38	0.9652	70
20967	S70_R	70	2015-09-05	0.38	0.9652	70
23451	S80_R	80	2015-09-05	0.06	0.1524	80
25935	S75_R	75	2015-09-05	1.51	3.8354	75
28419	S72_R	72	2015-09-05	0.99	2.5146	72
30855	S75_R	75	2015-09-05	1.51	3.8354	75
33291	S84	84	2015-09-05	0.03	0.0762	84
35775	S97_R	97	2015-09-05	0.62	1.5748	97
38259	S84_R	84	2015-09-05	0.86	2.1844	84
40695	S97_R	97	2015-09-05	0.12	0.3048	97
43131	S153_R	153	2015-09-05	0	0	153
45616	S153_R	153	2015-09-05	0.84	2.1336	153
48100	S153_R	153	2015-09-05	0.84	2.1336	153
50536	S153	153	2015-09-05	0.84	2.1336	153
52972	S46	46	2015-09-05	1.74	4.4196	46
55408	S49	49	2015-09-05	0.34	0.8636	49
2075	S153	153	2015-09-06	0	0	153
4511	S46	46	2015-09-06	0	0	46
6947	S49	49	2015-09-06	0.07	0.178	49
8775	S386B_R	386	2015-09-06	0.46	1.1684	386
11211	S154_R	154	2015-09-06	0.51	1.2954	154
13627	S386B_R	386	2015-09-06	0.46	1.1684	386
16111	S70_R	70	2015-09-06	0.37	0.9398	70
18595	S70_R	70	2015-09-06	0.84	2.1336	70
20968	S70_R	70	2015-09-06	0.84	2.1336	70
23452	S80_R	80	2015-09-06	0	0	80
25936	S75_R	75	2015-09-06	0.76	1.9304	75
28420	S72_R	72	2015-09-06	1.16	2.9464	72
30856	S75_R	75	2015-09-06	0.76	1.9304	75
33292	S84	84	2015-09-06	0.86	2.1844	84
35776	S97_R	97	2015-09-06	0.47	1.1938	97
38260	S84_R	84	2015-09-06	0.13	0.3302	84
40696	S97_R	97	2015-09-06	0.35	0.889	97
43132	S153_R	153	2015-09-06	0.84	2.1336	153
45617	S153_R	153	2015-09-06	0	0	153
48101	S153_R	153	2015-09-06	0	0	153
50537	S153	153	2015-09-06	0	0	153
52973	S46	46	2015-09-06	0	0	46
55409	S49	49	2015-09-06	0.07	0.1778	49
2076	S153	153	2015-09-07	0.12	0.305	153
4512	S46	46	2015-09-07	0.68	1.727	46
6948	S49	49	2015-09-07	0.8	2.032	49
8776	S386B_R	386	2015-09-07	0.01	0.0254	386
11212	S154_R	154	2015-09-07	0.08	0.2032	154
13628	S386B_R	386	2015-09-07	0.01	0.0254	386
16112	S70_R	70	2015-09-07	0.84	2.1336	70
18596	S70_R	70	2015-09-07	0.06	0.1524	70
20969	S70_R	70	2015-09-07	0.06	0.1524	70
23453	S80_R	80	2015-09-07	0.13	0.3302	80
25937	S75_R	75	2015-09-07	0.03	0.0762	75
28421	S72_R	72	2015-09-07	0.04	0.1016	72
30857	S75_R	75	2015-09-07	0.03	0.0762	75
33293	S84	84	2015-09-07	0.29	0.7366	84
35777	S97_R	97	2015-09-07	0	0	97
38261	S84_R	84	2015-09-07	0.04	0.1016	84
40697	S97_R	97	2015-09-07	0.52	1.3208	97
43133	S153_R	153	2015-09-07	0	0	153
45618	S153_R	153	2015-09-07	0.12	0.3048	153
48102	S153_R	153	2015-09-07	0.12	0.3048	153
50538	S153	153	2015-09-07	0.12	0.3048	153
52974	S46	46	2015-09-07	0.68	1.7272	46
55410	S49	49	2015-09-07	0.8	2.032	49
2077	S153	153	2015-09-08	0.01	0.025	153
4513	S46	46	2015-09-08	0	0	46
6949	S49	49	2015-09-08	0	0	49
8777	S386B_R	386	2015-09-08	0	0	386
11213	S154_R	154	2015-09-08	0.01	0.0254	154
13629	S386B_R	386	2015-09-08	0	0	386
16113	S70_R	70	2015-09-08	0.06	0.1524	70
18597	S70_R	70	2015-09-08	0	0	70
20970	S70_R	70	2015-09-08	0	0	70
23454	S80_R	80	2015-09-08	0.02	0.0508	80
25938	S75_R	75	2015-09-08	0	0	75
28422	S72_R	72	2015-09-08	0.13	0.3302	72
30858	S75_R	75	2015-09-08	0	0	75
33294	S84	84	2015-09-08	0.04	0.1016	84
35778	S97_R	97	2015-09-08	0.52	1.3208	97
38262	S84_R	84	2015-09-08	0	0	84
40698	S97_R	97	2015-09-08	0	0	97
43134	S153_R	153	2015-09-08	0.12	0.3048	153
45619	S153_R	153	2015-09-08	0.01	0.0254	153
48103	S153_R	153	2015-09-08	0.01	0.0254	153
50539	S153	153	2015-09-08	0.01	0.0254	153
52975	S46	46	2015-09-08	0	0	46
55411	S49	49	2015-09-08	0	0	49
2078	S153	153	2015-09-09	0	0	153
4514	S46	46	2015-09-09	0	0	46
6950	S49	49	2015-09-09	0.15	0.381	49
8778	S386B_R	386	2015-09-09	0	0	386
11214	S154_R	154	2015-09-09	0	0	154
13630	S386B_R	386	2015-09-09	0	0	386
16114	S70_R	70	2015-09-09	0	0	70
18598	S70_R	70	2015-09-09	0	0	70
20971	S70_R	70	2015-09-09	0	0	70
23455	S80_R	80	2015-09-09	0	0	80
25939	S75_R	75	2015-09-09	0.02	0.0508	75
28423	S72_R	72	2015-09-09	0	0	72
30859	S75_R	75	2015-09-09	0.02	0.0508	75
33295	S84	84	2015-09-09	0	0	84
35779	S97_R	97	2015-09-09	0	0	97
38263	S84_R	84	2015-09-09	0	0	84
40699	S97_R	97	2015-09-09	0.01	0.0254	97
43135	S153_R	153	2015-09-09	0.01	0.0254	153
45620	S153_R	153	2015-09-09	0	0	153
48104	S153_R	153	2015-09-09	0	0	153
50540	S153	153	2015-09-09	0	0	153
52976	S46	46	2015-09-09	0	0	46
55412	S49	49	2015-09-09	0.15	0.381	49
2079	S153	153	2015-09-10	0	0	153
4515	S46	46	2015-09-10	0	0	46
6951	S49	49	2015-09-10	0	0	49
8779	S386B_R	386	2015-09-10	0.13	0.3302	386
11215	S154_R	154	2015-09-10	0	0	154
13631	S386B_R	386	2015-09-10	0.13	0.3302	386
16115	S70_R	70	2015-09-10	0	0	70
18599	S70_R	70	2015-09-10	0	0	70
20972	S70_R	70	2015-09-10	0	0	70
23456	S80_R	80	2015-09-10	0	0	80
25940	S75_R	75	2015-09-10	0.01	0.0254	75
28424	S72_R	72	2015-09-10	0	0	72
30860	S75_R	75	2015-09-10	0.01	0.0254	75
33296	S84	84	2015-09-10	0	0	84
35780	S97_R	97	2015-09-10	0.01	0.0254	97
38264	S84_R	84	2015-09-10	0	0	84
40700	S97_R	97	2015-09-10	0	0	97
43136	S153_R	153	2015-09-10	0	0	153
45621	S153_R	153	2015-09-10	0	0	153
48105	S153_R	153	2015-09-10	0	0	153
50541	S153	153	2015-09-10	0	0	153
52977	S46	46	2015-09-10	0	0	46
55413	S49	49	2015-09-10	0	0	49
2080	S153	153	2015-09-11	1.93	4.902	153
4516	S46	46	2015-09-11	0.02	0.051	46
6952	S49	49	2015-09-11	0.12	0.305	49
8780	S386B_R	386	2015-09-11	0.66	1.6764	386
11216	S154_R	154	2015-09-11	0.19	0.4826	154
13632	S386B_R	386	2015-09-11	0.66	1.6764	386
16116	S70_R	70	2015-09-11	0	0	70
18600	S70_R	70	2015-09-11	0.17	0.4318	70
20973	S70_R	70	2015-09-11	0.17	0.4318	70
23457	S80_R	80	2015-09-11	1.5	3.81	80
25941	S75_R	75	2015-09-11	0.18	0.4572	75
28425	S72_R	72	2015-09-11	0.19	0.4826	72
30861	S75_R	75	2015-09-11	0.18	0.4572	75
33297	S84	84	2015-09-11	0	0	84
35781	S97_R	97	2015-09-11	0	0	97
38265	S84_R	84	2015-09-11	0.15	0.381	84
40701	S97_R	97	2015-09-11	0.41	1.0414	97
43137	S153_R	153	2015-09-11	0	0	153
45622	S153_R	153	2015-09-11	1.93	4.9022	153
48106	S153_R	153	2015-09-11	1.93	4.9022	153
50542	S153	153	2015-09-11	1.93	4.9022	153
52978	S46	46	2015-09-11	0.02	0.0508	46
55414	S49	49	2015-09-11	0.12	0.3048	49
2081	S153	153	2015-09-12	0.01	0.025	153
4517	S46	46	2015-09-12	0	0	46
6953	S49	49	2015-09-12	0.01	0.025	49
8781	S386B_R	386	2015-09-12	0.09	0.2286	386
11217	S154_R	154	2015-09-12	0.22	0.5588	154
13633	S386B_R	386	2015-09-12	0.09	0.2286	386
16117	S70_R	70	2015-09-12	0.18	0.4572	70
18601	S70_R	70	2015-09-12	0.22	0.5588	70
20974	S70_R	70	2015-09-12	0.22	0.5588	70
23458	S80_R	80	2015-09-12	0.01	0.0254	80
25942	S75_R	75	2015-09-12	0.03	0.0762	75
28426	S72_R	72	2015-09-12	0.4	1.016	72
30862	S75_R	75	2015-09-12	0.03	0.0762	75
33298	S84	84	2015-09-12	0.15	0.381	84
35782	S97_R	97	2015-09-12	0.41	1.0414	97
38266	S84_R	84	2015-09-12	0.02	0.0508	84
40702	S97_R	97	2015-09-12	0	0	97
43138	S153_R	153	2015-09-12	1.94	4.9276	153
45623	S153_R	153	2015-09-12	0.01	0.0254	153
48107	S153_R	153	2015-09-12	0.01	0.0254	153
50543	S153	153	2015-09-12	0.01	0.0254	153
52979	S46	46	2015-09-12	0	0	46
55415	S49	49	2015-09-12	0.01	0.0254	49
2082	S153	153	2015-09-13	0	0	153
4518	S46	46	2015-09-13	0.42	1.067	46
6954	S49	49	2015-09-13	0.02	0.051	49
8782	S386B_R	386	2015-09-13	0.3	0.762	386
11218	S154_R	154	2015-09-13	0.25	0.635	154
13634	S386B_R	386	2015-09-13	0.3	0.762	386
16118	S70_R	70	2015-09-13	0.21	0.5334	70
18602	S70_R	70	2015-09-13	0.22	0.5588	70
20975	S70_R	70	2015-09-13	0.22	0.5588	70
23459	S80_R	80	2015-09-13	0	0	80
25943	S75_R	75	2015-09-13	0.19	0.4826	75
28427	S72_R	72	2015-09-13	0.23	0.5842	72
30863	S75_R	75	2015-09-13	0.19	0.4826	75
33299	S84	84	2015-09-13	0.02	0.0508	84
35783	S97_R	97	2015-09-13	0	0	97
38267	S84_R	84	2015-09-13	0.34	0.8636	84
40703	S97_R	97	2015-09-13	0	0	97
43139	S153_R	153	2015-09-13	0	0	153
45624	S153_R	153	2015-09-13	0	0	153
48108	S153_R	153	2015-09-13	0	0	153
50544	S153	153	2015-09-13	0	0	153
52980	S46	46	2015-09-13	0.42	1.0668	46
55416	S49	49	2015-09-13	0.02	0.0508	49
2083	S153	153	2015-09-14	0.62	1.575	153
4519	S46	46	2015-09-14	0	0	46
6955	S49	49	2015-09-14	0	0	49
8783	S386B_R	386	2015-09-14	1.69	4.2926	386
11219	S154_R	154	2015-09-14	0.98	2.4892	154
13635	S386B_R	386	2015-09-14	1.69	4.2926	386
16119	S70_R	70	2015-09-14	0.22	0.5588	70
18603	S70_R	70	2015-09-14	1.66	4.2164	70
20976	S70_R	70	2015-09-14	1.66	4.2164	70
23460	S80_R	80	2015-09-14	0	0	80
25944	S75_R	75	2015-09-14	0.08	0.2032	75
28428	S72_R	72	2015-09-14	0.95	2.413	72
30864	S75_R	75	2015-09-14	0.08	0.2032	75
33300	S84	84	2015-09-14	0.34	0.8636	84
35784	S97_R	97	2015-09-14	0	0	97
38268	S84_R	84	2015-09-14	0.16	0.4064	84
40704	S97_R	97	2015-09-14	0	0	97
43140	S153_R	153	2015-09-14	0	0	153
45625	S153_R	153	2015-09-14	0.62	1.5748	153
48109	S153_R	153	2015-09-14	0.62	1.5748	153
50545	S153	153	2015-09-14	0.62	1.5748	153
52981	S46	46	2015-09-14	0	0	46
55417	S49	49	2015-09-14	0	0	49
2084	S153	153	2015-09-15	0.1	0.254	153
4520	S46	46	2015-09-15	0.9	2.286	46
6956	S49	49	2015-09-15	0.16	0.406	49
8784	S386B_R	386	2015-09-15	0.46	1.1684	386
11220	S154_R	154	2015-09-15	0.07	0.1778	154
13636	S386B_R	386	2015-09-15	0.46	1.1684	386
16120	S70_R	70	2015-09-15	1.66	4.2164	70
18604	S70_R	70	2015-09-15	0.08	0.2032	70
20977	S70_R	70	2015-09-15	0.08	0.2032	70
23461	S80_R	80	2015-09-15	0.28	0.7112	80
25945	S75_R	75	2015-09-15	0.11	0.2794	75
28429	S72_R	72	2015-09-15	0.36	0.9144	72
30865	S75_R	75	2015-09-15	0.11	0.2794	75
33301	S84	84	2015-09-15	0.16	0.4064	84
35785	S97_R	97	2015-09-15	0	0	97
38269	S84_R	84	2015-09-15	0.49	1.2446	84
40705	S97_R	97	2015-09-15	0.02	0.0508	97
43141	S153_R	153	2015-09-15	0.62	1.5748	153
45626	S153_R	153	2015-09-15	0.1	0.254	153
48110	S153_R	153	2015-09-15	0.1	0.254	153
50546	S153	153	2015-09-15	0.1	0.254	153
52982	S46	46	2015-09-15	0.9	2.286	46
55418	S49	49	2015-09-15	0.16	0.4064	49
2085	S153	153	2015-09-16	0.11	0.279	153
4521	S46	46	2015-09-16	2.91	7.391	46
6957	S49	49	2015-09-16	1.59	4.039	49
8785	S386B_R	386	2015-09-16	0.48	1.2192	386
11221	S154_R	154	2015-09-16	0.19	0.4826	154
13637	S386B_R	386	2015-09-16	0.48	1.2192	386
16121	S70_R	70	2015-09-16	0.08	0.2032	70
18605	S70_R	70	2015-09-16	0.04	0.1016	70
20978	S70_R	70	2015-09-16	0.04	0.1016	70
23462	S80_R	80	2015-09-16	1.73	4.3942	80
25946	S75_R	75	2015-09-16	0	0	75
28430	S72_R	72	2015-09-16	0.1	0.254	72
30866	S75_R	75	2015-09-16	0	0	75
33302	S84	84	2015-09-16	0.57	1.4478	84
35786	S97_R	97	2015-09-16	0.25	0.635	97
38270	S84_R	84	2015-09-16	0.09	0.2286	84
40706	S97_R	97	2015-09-16	0.81	2.0574	97
43142	S153_R	153	2015-09-16	0.2	0.508	153
45627	S153_R	153	2015-09-16	0.11	0.2794	153
48111	S153_R	153	2015-09-16	0.11	0.2794	153
50547	S153	153	2015-09-16	0.11	0.2794	153
52983	S46	46	2015-09-16	2.91	7.3914	46
55419	S49	49	2015-09-16	1.59	4.0386	49
2086	S153	153	2015-09-17	3.42	8.687	153
4522	S46	46	2015-09-17	1.97	5.004	46
6958	S49	49	2015-09-17	2.7	6.858	49
8786	S386B_R	386	2015-09-17	1.44	3.6576	386
11222	S154_R	154	2015-09-17	1.69	4.2926	154
13638	S386B_R	386	2015-09-17	1.44	3.6576	386
16122	S70_R	70	2015-09-17	0.15	0.381	70
18606	S70_R	70	2015-09-17	1.68	4.2672	70
20979	S70_R	70	2015-09-17	1.68	4.2672	70
23463	S80_R	80	2015-09-17	2.39	6.0706	80
25947	S75_R	75	2015-09-17	1.87	4.7498	75
28431	S72_R	72	2015-09-17	0.67	1.7018	72
30867	S75_R	75	2015-09-17	1.87	4.7498	75
33303	S84	84	2015-09-17	0.34	0.8636	84
35787	S97_R	97	2015-09-17	1.6	4.064	97
38271	S84_R	84	2015-09-17	0.73	1.8542	84
40707	S97_R	97	2015-09-17	4.77	12.1158	97
43143	S153_R	153	2015-09-17	1.08	2.7432	153
45628	S153_R	153	2015-09-17	3.42	8.6868	153
48112	S153_R	153	2015-09-17	3.42	8.6868	153
50548	S153	153	2015-09-17	3.42	8.6868	153
52984	S46	46	2015-09-17	1.97	5.0038	46
55420	S49	49	2015-09-17	2.7	6.858	49
2087	S153	153	2015-09-18	0.03	0.076	153
4523	S46	46	2015-09-18	0.07	0.178	46
6959	S49	49	2015-09-18	0.36	0.914	49
8787	S386B_R	386	2015-09-18	0.01	0.0254	386
11223	S154_R	154	2015-09-18	0	0	154
13639	S386B_R	386	2015-09-18	0.01	0.0254	386
16123	S70_R	70	2015-09-18	1.58	4.0132	70
18607	S70_R	70	2015-09-18	0.01	0.0254	70
20980	S70_R	70	2015-09-18	0.01	0.0254	70
23464	S80_R	80	2015-09-18	0.45	1.143	80
25948	S75_R	75	2015-09-18	0	0	75
28432	S72_R	72	2015-09-18	0.01	0.0254	72
30868	S75_R	75	2015-09-18	0	0	75
33304	S84	84	2015-09-18	0.4	1.016	84
35788	S97_R	97	2015-09-18	3.76	9.5504	97
38272	S84_R	84	2015-09-18	0.01	0.0254	84
40708	S97_R	97	2015-09-18	0.3	0.762	97
43144	S153_R	153	2015-09-18	2.36	5.9944	153
45629	S153_R	153	2015-09-18	0.03	0.0762	153
48113	S153_R	153	2015-09-18	0.03	0.0762	153
50549	S153	153	2015-09-18	0.03	0.0762	153
52985	S46	46	2015-09-18	0.07	0.1778	46
55421	S49	49	2015-09-18	0.36	0.9144	49
2088	S153	153	2015-09-19	0.23	0.584	153
4524	S46	46	2015-09-19	0.08	0.203	46
6960	S49	49	2015-09-19	0.01	0.025	49
8788	S386B_R	386	2015-09-19	0.01	0.0254	386
11224	S154_R	154	2015-09-19	0.01	0.0254	154
13640	S386B_R	386	2015-09-19	0.01	0.0254	386
16124	S70_R	70	2015-09-19	0	0	70
18608	S70_R	70	2015-09-19	0	0	70
20981	S70_R	70	2015-09-19	0	0	70
23465	S80_R	80	2015-09-19	0	0	80
25949	S75_R	75	2015-09-19	0.01	0.0254	75
28433	S72_R	72	2015-09-19	0	0	72
30869	S75_R	75	2015-09-19	0.01	0.0254	75
33305	S84	84	2015-09-19	0.01	0.0254	84
35789	S97_R	97	2015-09-19	0.29	0.7366	97
38273	S84_R	84	2015-09-19	0	0	84
40709	S97_R	97	2015-09-19	0.01	0.0254	97
43145	S153_R	153	2015-09-19	0.06	0.1524	153
45630	S153_R	153	2015-09-19	0.23	0.5842	153
48114	S153_R	153	2015-09-19	0.23	0.5842	153
50550	S153	153	2015-09-19	0.23	0.5842	153
52986	S46	46	2015-09-19	0.08	0.2032	46
55422	S49	49	2015-09-19	0.01	0.0254	49
2089	S153	153	2015-09-20	0	0	153
4525	S46	46	2015-09-20	0	0	46
6961	S49	49	2015-09-20	0	0	49
8789	S386B_R	386	2015-09-20	0	0	386
11225	S154_R	154	2015-09-20	0	0	154
13641	S386B_R	386	2015-09-20	0	0	386
16125	S70_R	70	2015-09-20	0	0	70
18609	S70_R	70	2015-09-20	0	0	70
20982	S70_R	70	2015-09-20	0	0	70
23466	S80_R	80	2015-09-20	0	0	80
25950	S75_R	75	2015-09-20	0	0	75
28434	S72_R	72	2015-09-20	0	0	72
30870	S75_R	75	2015-09-20	0	0	75
33306	S84	84	2015-09-20	0	0	84
35790	S97_R	97	2015-09-20	0.01	0.0254	97
38274	S84_R	84	2015-09-20	0	0	84
40710	S97_R	97	2015-09-20	0	0	97
43146	S153_R	153	2015-09-20	0.19	0.4826	153
45631	S153_R	153	2015-09-20	0	0	153
48115	S153_R	153	2015-09-20	0	0	153
50551	S153	153	2015-09-20	0	0	153
52987	S46	46	2015-09-20	0	0	46
55423	S49	49	2015-09-20	0	0	49
2090	S153	153	2015-09-21	0.01	0.025	153
4526	S46	46	2015-09-21	0	0	46
6962	S49	49	2015-09-21	0.01	0.025	49
8790	S386B_R	386	2015-09-21	0	0	386
11226	S154_R	154	2015-09-21	0	0	154
13642	S386B_R	386	2015-09-21	0	0	386
16126	S70_R	70	2015-09-21	0	0	70
18610	S70_R	70	2015-09-21	0	0	70
20983	S70_R	70	2015-09-21	0	0	70
23467	S80_R	80	2015-09-21	0	0	80
25951	S75_R	75	2015-09-21	0	0	75
28435	S72_R	72	2015-09-21	0	0	72
30871	S75_R	75	2015-09-21	0	0	75
33307	S84	84	2015-09-21	0	0	84
35791	S97_R	97	2015-09-21	0	0	97
38275	S84_R	84	2015-09-21	0	0	84
40711	S97_R	97	2015-09-21	0	0	97
43147	S153_R	153	2015-09-21	0	0	153
45632	S153_R	153	2015-09-21	0.01	0.0254	153
48116	S153_R	153	2015-09-21	0.01	0.0254	153
50552	S153	153	2015-09-21	0.01	0.0254	153
52988	S46	46	2015-09-21	0	0	46
55424	S49	49	2015-09-21	0.01	0.0254	49
2091	S153	153	2015-09-22	0.01	0.025	153
4527	S46	46	2015-09-22	0.07	0.178	46
6963	S49	49	2015-09-22	0	0	49
8791	S386B_R	386	2015-09-22	0.01	0.0254	386
11227	S154_R	154	2015-09-22	0.01	0.0254	154
13643	S386B_R	386	2015-09-22	0.01	0.0254	386
16127	S70_R	70	2015-09-22	0	0	70
18611	S70_R	70	2015-09-22	0	0	70
20984	S70_R	70	2015-09-22	0	0	70
23468	S80_R	80	2015-09-22	0.01	0.0254	80
25952	S75_R	75	2015-09-22	0	0	75
28436	S72_R	72	2015-09-22	0.01	0.0254	72
30872	S75_R	75	2015-09-22	0	0	75
33308	S84	84	2015-09-22	0	0	84
35792	S97_R	97	2015-09-22	0	0	97
38276	S84_R	84	2015-09-22	0	0	84
40712	S97_R	97	2015-09-22	0	0	97
43148	S153_R	153	2015-09-22	0	0	153
45633	S153_R	153	2015-09-22	0.01	0.0254	153
48117	S153_R	153	2015-09-22	0.01	0.0254	153
50553	S153	153	2015-09-22	0.01	0.0254	153
52989	S46	46	2015-09-22	0.07	0.1778	46
55425	S49	49	2015-09-22	0	0	49
2092	S153	153	2015-09-23	0	0	153
4528	S46	46	2015-09-23	0.02	0.051	46
6964	S49	49	2015-09-23	0	0	49
8792	S386B_R	386	2015-09-23	0.09	0.2286	386
11228	S154_R	154	2015-09-23	0.02	0.0508	154
13644	S386B_R	386	2015-09-23	0.09	0.2286	386
16128	S70_R	70	2015-09-23	0	0	70
18612	S70_R	70	2015-09-23	0	0	70
20985	S70_R	70	2015-09-23	0	0	70
23469	S80_R	80	2015-09-23	0	0	80
25953	S75_R	75	2015-09-23	0	0	75
28437	S72_R	72	2015-09-23	0.25	0.635	72
30873	S75_R	75	2015-09-23	0	0	75
33309	S84	84	2015-09-23	0	0	84
35793	S97_R	97	2015-09-23	0	0	97
38277	S84_R	84	2015-09-23	0.02	0.0508	84
40713	S97_R	97	2015-09-23	0	0	97
43149	S153_R	153	2015-09-23	0.01	0.0254	153
45634	S153_R	153	2015-09-23	0	0	153
48118	S153_R	153	2015-09-23	0	0	153
50554	S153	153	2015-09-23	0	0	153
52990	S46	46	2015-09-23	0.02	0.0508	46
55426	S49	49	2015-09-23	0	0	49
2093	S153	153	2015-09-24	0.02	0.051	153
4529	S46	46	2015-09-24	0.13	0.33	46
6965	S49	49	2015-09-24	0	0	49
8793	S386B_R	386	2015-09-24	0.01	0.0254	386
11229	S154_R	154	2015-09-24	0.01	0.0254	154
13645	S386B_R	386	2015-09-24	0.01	0.0254	386
16129	S70_R	70	2015-09-24	0	0	70
18613	S70_R	70	2015-09-24	0	0	70
20986	S70_R	70	2015-09-24	0	0	70
23470	S80_R	80	2015-09-24	0	0	80
25954	S75_R	75	2015-09-24	0	0	75
28438	S72_R	72	2015-09-24	0	0	72
30874	S75_R	75	2015-09-24	0	0	75
33310	S84	84	2015-09-24	0.03	0.0762	84
35794	S97_R	97	2015-09-24	0.01	0.0254	97
38278	S84_R	84	2015-09-24	0.01	0.0254	84
40714	S97_R	97	2015-09-24	0.01	0.0254	97
43150	S153_R	153	2015-09-24	0	0	153
45635	S153_R	153	2015-09-24	0.02	0.0508	153
48119	S153_R	153	2015-09-24	0.02	0.0508	153
50555	S153	153	2015-09-24	0.02	0.0508	153
52991	S46	46	2015-09-24	0.13	0.3302	46
55427	S49	49	2015-09-24	0	0	49
2094	S153	153	2015-09-25	0	0	153
4530	S46	46	2015-09-25	0.21	0.533	46
6966	S49	49	2015-09-25	0.19	0.483	49
8794	S386B_R	386	2015-09-25	0.05	0.127	386
11230	S154_R	154	2015-09-25	0.64	1.6256	154
13646	S386B_R	386	2015-09-25	0.05	0.127	386
16130	S70_R	70	2015-09-25	0	0	70
18614	S70_R	70	2015-09-25	2.72	6.9088	70
20987	S70_R	70	2015-09-25	2.72	6.9088	70
23471	S80_R	80	2015-09-25	0	0	80
25955	S75_R	75	2015-09-25	0.18	0.4572	75
28439	S72_R	72	2015-09-25	0.06	0.1524	72
30875	S75_R	75	2015-09-25	0.18	0.4572	75
33311	S84	84	2015-09-25	0	0	84
35795	S97_R	97	2015-09-25	0	0	97
38279	S84_R	84	2015-09-25	0.98	2.4892	84
40715	S97_R	97	2015-09-25	0	0	97
43151	S153_R	153	2015-09-25	0.02	0.0508	153
45636	S153_R	153	2015-09-25	0	0	153
48120	S153_R	153	2015-09-25	0	0	153
50556	S153	153	2015-09-25	0	0	153
52992	S46	46	2015-09-25	0.21	0.5334	46
55428	S49	49	2015-09-25	0.19	0.4826	49
2095	S153	153	2015-09-26	0.64	1.626	153
4531	S46	46	2015-09-26	0	0	46
6967	S49	49	2015-09-26	0.02	0.051	49
8795	S386B_R	386	2015-09-26	0.09	0.2286	386
11231	S154_R	154	2015-09-26	0	0	154
13647	S386B_R	386	2015-09-26	0.09	0.2286	386
16131	S70_R	70	2015-09-26	2.73	6.9342	70
18615	S70_R	70	2015-09-26	0.01	0.0254	70
20988	S70_R	70	2015-09-26	0.01	0.0254	70
23472	S80_R	80	2015-09-26	0	0	80
25956	S75_R	75	2015-09-26	0	0	75
28440	S72_R	72	2015-09-26	0	0	72
30876	S75_R	75	2015-09-26	0	0	75
33312	S84	84	2015-09-26	0.98	2.4892	84
35796	S97_R	97	2015-09-26	0	0	97
38280	S84_R	84	2015-09-26	0	0	84
40716	S97_R	97	2015-09-26	0.01	0.0254	97
43152	S153_R	153	2015-09-26	0.01	0.0254	153
45637	S153_R	153	2015-09-26	0.64	1.6256	153
48121	S153_R	153	2015-09-26	0.64	1.6256	153
50557	S153	153	2015-09-26	0.64	1.6256	153
52993	S46	46	2015-09-26	0	0	46
55429	S49	49	2015-09-26	0.02	0.0508	49
2096	S153	153	2015-09-27	0.05	0.127	153
4532	S46	46	2015-09-27	0	0	46
6968	S49	49	2015-09-27	0	0	49
8796	S386B_R	386	2015-09-27	0.99	2.5146	386
11232	S154_R	154	2015-09-27	0	0	154
13648	S386B_R	386	2015-09-27	0.99	2.5146	386
16132	S70_R	70	2015-09-27	0	0	70
18616	S70_R	70	2015-09-27	0.01	0.0254	70
20989	S70_R	70	2015-09-27	0.01	0.0254	70
23473	S80_R	80	2015-09-27	0	0	80
25957	S75_R	75	2015-09-27	0	0	75
28441	S72_R	72	2015-09-27	0	0	72
30877	S75_R	75	2015-09-27	0	0	75
33313	S84	84	2015-09-27	0	0	84
35797	S97_R	97	2015-09-27	0.01	0.0254	97
38281	S84_R	84	2015-09-27	0	0	84
40717	S97_R	97	2015-09-27	0.02	0.0508	97
43153	S153_R	153	2015-09-27	0.63	1.6002	153
45638	S153_R	153	2015-09-27	0.05	0.127	153
48122	S153_R	153	2015-09-27	0.05	0.127	153
50558	S153	153	2015-09-27	0.05	0.127	153
52994	S46	46	2015-09-27	0	0	46
55430	S49	49	2015-09-27	0	0	49
2097	S153	153	2015-09-28	0	0	153
4533	S46	46	2015-09-28	0.47	1.194	46
6969	S49	49	2015-09-28	0	0	49
8797	S386B_R	386	2015-09-28	0	0	386
11233	S154_R	154	2015-09-28	0	0	154
13649	S386B_R	386	2015-09-28	0	0	386
16133	S70_R	70	2015-09-28	0.01	0.0254	70
18617	S70_R	70	2015-09-28	0.18	0.4572	70
20990	S70_R	70	2015-09-28	0.18	0.4572	70
23474	S80_R	80	2015-09-28	0.01	0.0254	80
25958	S75_R	75	2015-09-28	0.38	0.9652	75
28442	S72_R	72	2015-09-28	0.03	0.0762	72
30878	S75_R	75	2015-09-28	0.38	0.9652	75
33314	S84	84	2015-09-28	0	0	84
35798	S97_R	97	2015-09-28	0.02	0.0508	97
38282	S84_R	84	2015-09-28	0.45	1.143	84
40718	S97_R	97	2015-09-28	0.05	0.127	97
43154	S153_R	153	2015-09-28	0.05	0.127	153
45639	S153_R	153	2015-09-28	0	0	153
48123	S153_R	153	2015-09-28	0	0	153
50559	S153	153	2015-09-28	0	0	153
52995	S46	46	2015-09-28	0.47	1.1938	46
55431	S49	49	2015-09-28	0	0	49
2098	S153	153	2015-09-29	0.08	0.203	153
4534	S46	46	2015-09-29	0.01	0.025	46
6970	S49	49	2015-09-29	0.09	0.229	49
8798	S386B_R	386	2015-09-29	0.37	0.9398	386
11234	S154_R	154	2015-09-29	0.32	0.8128	154
13650	S386B_R	386	2015-09-29	0.37	0.9398	386
16134	S70_R	70	2015-09-29	0.34	0.8636	70
18618	S70_R	70	2015-09-29	0.5	1.27	70
20991	S70_R	70	2015-09-29	0.5	1.27	70
23475	S80_R	80	2015-09-29	0.03	0.0762	80
25959	S75_R	75	2015-09-29	0.42	1.0668	75
28443	S72_R	72	2015-09-29	0.32	0.8128	72
30879	S75_R	75	2015-09-29	0.42	1.0668	75
33315	S84	84	2015-09-29	0.51	1.2954	84
35799	S97_R	97	2015-09-29	0.05	0.127	97
38283	S84_R	84	2015-09-29	0.27	0.6858	84
40719	S97_R	97	2015-09-29	0.04	0.1016	97
43155	S153_R	153	2015-09-29	0	0	153
45640	S153_R	153	2015-09-29	0.08	0.2032	153
48124	S153_R	153	2015-09-29	0.08	0.2032	153
50560	S153	153	2015-09-29	0.08	0.2032	153
52996	S46	46	2015-09-29	0.01	0.0254	46
55432	S49	49	2015-09-29	0.09	0.2286	49
2099	S153	153	2015-09-30	0	0	153
4535	S46	46	2015-09-30	0	0	46
6971	S49	49	2015-09-30	0.02	0.051	49
8799	S386B_R	386	2015-09-30	0	0	386
11235	S154_R	154	2015-09-30	0.01	0.0254	154
13651	S386B_R	386	2015-09-30	0	0	386
16135	S70_R	70	2015-09-30	0.35	0.889	70
18619	S70_R	70	2015-09-30	0.01	0.0254	70
20992	S70_R	70	2015-09-30	0.01	0.0254	70
23476	S80_R	80	2015-09-30	0	0	80
25960	S75_R	75	2015-09-30	0.01	0.0254	75
28444	S72_R	72	2015-09-30	0	0	72
30880	S75_R	75	2015-09-30	0.01	0.0254	75
33316	S84	84	2015-09-30	0.21	0.5334	84
35800	S97_R	97	2015-09-30	0.04	0.1016	97
38284	S84_R	84	2015-09-30	0	0	84
40720	S97_R	97	2015-09-30	0.01	0.0254	97
43156	S153_R	153	2015-09-30	0.08	0.2032	153
45641	S153_R	153	2015-09-30	0	0	153
48125	S153_R	153	2015-09-30	0	0	153
50561	S153	153	2015-09-30	0	0	153
52997	S46	46	2015-09-30	0	0	46
55433	S49	49	2015-09-30	0.02	0.0508	49
2100	S153	153	2015-10-01	0	0	153
4536	S46	46	2015-10-01	0	0	46
6972	S49	49	2015-10-01	0	0	49
8800	S386B_R	386	2015-10-01	0	0	386
11236	S154_R	154	2015-10-01	0	0	154
13652	S386B_R	386	2015-10-01	0	0	386
16136	S70_R	70	2015-10-01	0	0	70
18620	S70_R	70	2015-10-01	0	0	70
20993	S70_R	70	2015-10-01	0	0	70
23477	S80_R	80	2015-10-01	0	0	80
25961	S75_R	75	2015-10-01	0	0	75
28445	S72_R	72	2015-10-01	0	0	72
30881	S75_R	75	2015-10-01	0	0	75
33317	S84	84	2015-10-01	0	0	84
35801	S97_R	97	2015-10-01	0.01	0.0254	97
38285	S84_R	84	2015-10-01	0	0	84
40721	S97_R	97	2015-10-01	0	0	97
43157	S153_R	153	2015-10-01	0	0	153
45642	S153_R	153	2015-10-01	0	0	153
48126	S153_R	153	2015-10-01	0	0	153
50562	S153	153	2015-10-01	0	0	153
52998	S46	46	2015-10-01	0	0	46
55434	S49	49	2015-10-01	0	0	49
2101	S153	153	2015-10-02	0.08	0.203	153
4537	S46	46	2015-10-02	0	0	46
6973	S49	49	2015-10-02	0	0	49
8801	S386B_R	386	2015-10-02	0	0	386
11237	S154_R	154	2015-10-02	0.06	0.1524	154
13653	S386B_R	386	2015-10-02	0	0	386
16137	S70_R	70	2015-10-02	0	0	70
18621	S70_R	70	2015-10-02	0	0	70
20994	S70_R	70	2015-10-02	0	0	70
23478	S80_R	80	2015-10-02	0	0	80
25962	S75_R	75	2015-10-02	0	0	75
28446	S72_R	72	2015-10-02	0	0	72
30882	S75_R	75	2015-10-02	0	0	75
33318	S84	84	2015-10-02	0	0	84
35802	S97_R	97	2015-10-02	0	0	97
38286	S84_R	84	2015-10-02	0	0	84
40722	S97_R	97	2015-10-02	0	0	97
43158	S153_R	153	2015-10-02	0	0	153
45643	S153_R	153	2015-10-02	0.08	0.2032	153
48127	S153_R	153	2015-10-02	0.08	0.2032	153
50563	S153	153	2015-10-02	0.08	0.2032	153
52999	S46	46	2015-10-02	0	0	46
55435	S49	49	2015-10-02	0	0	49
2102	S153	153	2015-10-03	0	0	153
4538	S46	46	2015-10-03	0	0	46
6974	S49	49	2015-10-03	0	0	49
8802	S386B_R	386	2015-10-03	0	0	386
11238	S154_R	154	2015-10-03	0	0	154
13654	S386B_R	386	2015-10-03	0	0	386
16138	S70_R	70	2015-10-03	0	0	70
18622	S70_R	70	2015-10-03	0	0	70
20995	S70_R	70	2015-10-03	0	0	70
23479	S80_R	80	2015-10-03	0	0	80
25963	S75_R	75	2015-10-03	0	0	75
28447	S72_R	72	2015-10-03	0	0	72
30883	S75_R	75	2015-10-03	0	0	75
33319	S84	84	2015-10-03	0	0	84
35803	S97_R	97	2015-10-03	0.01	0.0254	97
38287	S84_R	84	2015-10-03	0	0	84
40723	S97_R	97	2015-10-03	0.01	0.0254	97
43159	S153_R	153	2015-10-03	0.08	0.2032	153
45644	S153_R	153	2015-10-03	0	0	153
48128	S153_R	153	2015-10-03	0	0	153
50564	S153	153	2015-10-03	0	0	153
53000	S46	46	2015-10-03	0	0	46
55436	S49	49	2015-10-03	0	0	49
2103	S153	153	2015-10-04	0.19	0.483	153
4539	S46	46	2015-10-04	0.07	0.178	46
6975	S49	49	2015-10-04	0.35	0.889	49
8803	S386B_R	386	2015-10-04	0.31	0.7874	386
11239	S154_R	154	2015-10-04	0.22	0.5588	154
13655	S386B_R	386	2015-10-04	0.31	0.7874	386
16139	S70_R	70	2015-10-04	0	0	70
18623	S70_R	70	2015-10-04	0.42	1.0668	70
20996	S70_R	70	2015-10-04	0.42	1.0668	70
23480	S80_R	80	2015-10-04	0.1	0.254	80
25964	S75_R	75	2015-10-04	0.21	0.5334	75
28448	S72_R	72	2015-10-04	0.24	0.6096	72
30884	S75_R	75	2015-10-04	0.21	0.5334	75
33320	S84	84	2015-10-04	0	0	84
35804	S97_R	97	2015-10-04	0	0	97
38288	S84_R	84	2015-10-04	0.19	0.4826	84
40724	S97_R	97	2015-10-04	0.26	0.6604	97
43160	S153_R	153	2015-10-04	0	0	153
45645	S153_R	153	2015-10-04	0.19	0.4826	153
48129	S153_R	153	2015-10-04	0.19	0.4826	153
50565	S153	153	2015-10-04	0.19	0.4826	153
53001	S46	46	2015-10-04	0.07	0.1778	46
55437	S49	49	2015-10-04	0.35	0.889	49
2104	S153	153	2015-10-05	0.04	0.102	153
4540	S46	46	2015-10-05	0.12	0.305	46
6976	S49	49	2015-10-05	0.01	0.025	49
8804	S386B_R	386	2015-10-05	0	0	386
11240	S154_R	154	2015-10-05	0.01	0.0254	154
13656	S386B_R	386	2015-10-05	0	0	386
16140	S70_R	70	2015-10-05	0.42	1.0668	70
18624	S70_R	70	2015-10-05	0	0	70
20997	S70_R	70	2015-10-05	0	0	70
23481	S80_R	80	2015-10-05	0.46	1.1684	80
25965	S75_R	75	2015-10-05	0.01	0.0254	75
28449	S72_R	72	2015-10-05	0	0	72
30885	S75_R	75	2015-10-05	0.01	0.0254	75
33321	S84	84	2015-10-05	0.03	0.0762	84
35805	S97_R	97	2015-10-05	0.26	0.6604	97
38289	S84_R	84	2015-10-05	0	0	84
40725	S97_R	97	2015-10-05	0.01	0.0254	97
43161	S153_R	153	2015-10-05	0.19	0.4826	153
45646	S153_R	153	2015-10-05	0.04	0.1016	153
48130	S153_R	153	2015-10-05	0.04	0.1016	153
50566	S153	153	2015-10-05	0.04	0.1016	153
53002	S46	46	2015-10-05	0.12	0.3048	46
55438	S49	49	2015-10-05	0.01	0.0254	49
2105	S153	153	2015-10-06	0	0	153
4541	S46	46	2015-10-06	0.01	0.025	46
6977	S49	49	2015-10-06	0	0	49
8805	S386B_R	386	2015-10-06	0	0	386
11241	S154_R	154	2015-10-06	0	0	154
13657	S386B_R	386	2015-10-06	0	0	386
16141	S70_R	70	2015-10-06	0	0	70
18625	S70_R	70	2015-10-06	0	0	70
20998	S70_R	70	2015-10-06	0	0	70
23482	S80_R	80	2015-10-06	0	0	80
25966	S75_R	75	2015-10-06	0.01	0.0254	75
28450	S72_R	72	2015-10-06	0.01	0.0254	72
30886	S75_R	75	2015-10-06	0.01	0.0254	75
33322	S84	84	2015-10-06	0	0	84
35806	S97_R	97	2015-10-06	0.01	0.0254	97
38290	S84_R	84	2015-10-06	0	0	84
40726	S97_R	97	2015-10-06	0	0	97
43162	S153_R	153	2015-10-06	0.04	0.1016	153
45647	S153_R	153	2015-10-06	0	0	153
48131	S153_R	153	2015-10-06	0	0	153
50567	S153	153	2015-10-06	0	0	153
53003	S46	46	2015-10-06	0.01	0.0254	46
55439	S49	49	2015-10-06	0	0	49
2106	S153	153	2015-10-07	0	0	153
4542	S46	46	2015-10-07	0	0	46
6978	S49	49	2015-10-07	0	0	49
8806	S386B_R	386	2015-10-07	0	0	386
11242	S154_R	154	2015-10-07	0	0	154
13658	S386B_R	386	2015-10-07	0	0	386
16142	S70_R	70	2015-10-07	0	0	70
18626	S70_R	70	2015-10-07	0	0	70
20999	S70_R	70	2015-10-07	0	0	70
23483	S80_R	80	2015-10-07	0.12	0.3048	80
25967	S75_R	75	2015-10-07	0	0	75
28451	S72_R	72	2015-10-07	0	0	72
30887	S75_R	75	2015-10-07	0	0	75
33323	S84	84	2015-10-07	0	0	84
35807	S97_R	97	2015-10-07	0	0	97
38291	S84_R	84	2015-10-07	0.01	0.0254	84
40727	S97_R	97	2015-10-07	0	0	97
43163	S153_R	153	2015-10-07	0	0	153
45648	S153_R	153	2015-10-07	0	0	153
48132	S153_R	153	2015-10-07	0	0	153
50568	S153	153	2015-10-07	0	0	153
53004	S46	46	2015-10-07	0	0	46
55440	S49	49	2015-10-07	0	0	49
2107	S153	153	2015-10-08	0	0	153
4543	S46	46	2015-10-08	0.23	0.584	46
6979	S49	49	2015-10-08	0.03	0.076	49
8807	S386B_R	386	2015-10-08	0	0	386
11243	S154_R	154	2015-10-08	0	0	154
13659	S386B_R	386	2015-10-08	0	0	386
16143	S70_R	70	2015-10-08	0	0	70
18627	S70_R	70	2015-10-08	0	0	70
21000	S70_R	70	2015-10-08	0	0	70
23484	S80_R	80	2015-10-08	0.16	0.4064	80
25968	S75_R	75	2015-10-08	0	0	75
28452	S72_R	72	2015-10-08	0	0	72
30888	S75_R	75	2015-10-08	0	0	75
33324	S84	84	2015-10-08	0	0	84
35808	S97_R	97	2015-10-08	0	0	97
38292	S84_R	84	2015-10-08	0	0	84
40728	S97_R	97	2015-10-08	0.02	0.0508	97
43164	S153_R	153	2015-10-08	0	0	153
45649	S153_R	153	2015-10-08	0	0	153
48133	S153_R	153	2015-10-08	0	0	153
50569	S153	153	2015-10-08	0	0	153
53005	S46	46	2015-10-08	0.23	0.5842	46
55441	S49	49	2015-10-08	0.03	0.0762	49
2108	S153	153	2015-10-09	0	0	153
4544	S46	46	2015-10-09	0.02	0.051	46
6980	S49	49	2015-10-09	0	0	49
8808	S386B_R	386	2015-10-09	0.33	0.8382	386
11244	S154_R	154	2015-10-09	0	0	154
13660	S386B_R	386	2015-10-09	0.33	0.8382	386
16144	S70_R	70	2015-10-09	0	0	70
18628	S70_R	70	2015-10-09	0.36	0.9144	70
21001	S70_R	70	2015-10-09	0.36	0.9144	70
23485	S80_R	80	2015-10-09	0	0	80
25969	S75_R	75	2015-10-09	0.01	0.0254	75
28453	S72_R	72	2015-10-09	0.01	0.0254	72
30889	S75_R	75	2015-10-09	0.01	0.0254	75
33325	S84	84	2015-10-09	0	0	84
35809	S97_R	97	2015-10-09	0.02	0.0508	97
38293	S84_R	84	2015-10-09	0	0	84
40729	S97_R	97	2015-10-09	0	0	97
43165	S153_R	153	2015-10-09	0	0	153
45650	S153_R	153	2015-10-09	0	0	153
48134	S153_R	153	2015-10-09	0	0	153
50570	S153	153	2015-10-09	0	0	153
53006	S46	46	2015-10-09	0.02	0.0508	46
55442	S49	49	2015-10-09	0	0	49
2109	S153	153	2015-10-10	0.1	0.254	153
4545	S46	46	2015-10-10	0	0	46
6981	S49	49	2015-10-10	0.06	0.152	49
8809	S386B_R	386	2015-10-10	0.26	0.6604	386
11245	S154_R	154	2015-10-10	0.72	1.8288	154
13661	S386B_R	386	2015-10-10	0.26	0.6604	386
16145	S70_R	70	2015-10-10	0.36	0.9144	70
18629	S70_R	70	2015-10-10	0.37	0.9398	70
21002	S70_R	70	2015-10-10	0.37	0.9398	70
23486	S80_R	80	2015-10-10	0	0	80
25970	S75_R	75	2015-10-10	0.53	1.3462	75
28454	S72_R	72	2015-10-10	0.41	1.0414	72
30890	S75_R	75	2015-10-10	0.53	1.3462	75
33326	S84	84	2015-10-10	0	0	84
35810	S97_R	97	2015-10-10	0	0	97
38294	S84_R	84	2015-10-10	0.6	1.524	84
40730	S97_R	97	2015-10-10	0.1	0.254	97
43166	S153_R	153	2015-10-10	0	0	153
45651	S153_R	153	2015-10-10	0.1	0.254	153
48135	S153_R	153	2015-10-10	0.1	0.254	153
50571	S153	153	2015-10-10	0.1	0.254	153
53007	S46	46	2015-10-10	0	0	46
55443	S49	49	2015-10-10	0.06	0.1524	49
2110	S153	153	2015-10-11	0	0	153
4546	S46	46	2015-10-11	0	0	46
6982	S49	49	2015-10-11	0.01	0.025	49
8810	S386B_R	386	2015-10-11	0.06	0.1524	386
11246	S154_R	154	2015-10-11	0.07	0.1778	154
13662	S386B_R	386	2015-10-11	0.06	0.1524	386
16146	S70_R	70	2015-10-11	0.38	0.9652	70
18630	S70_R	70	2015-10-11	0.35	0.889	70
21003	S70_R	70	2015-10-11	0.35	0.889	70
23487	S80_R	80	2015-10-11	0	0	80
25971	S75_R	75	2015-10-11	0.09	0.2286	75
28455	S72_R	72	2015-10-11	0.32	0.8128	72
30891	S75_R	75	2015-10-11	0.09	0.2286	75
33327	S84	84	2015-10-11	0.6	1.524	84
35811	S97_R	97	2015-10-11	0.11	0.2794	97
38295	S84_R	84	2015-10-11	0.04	0.1016	84
40731	S97_R	97	2015-10-11	0.01	0.0254	97
43167	S153_R	153	2015-10-11	0.1	0.254	153
45652	S153_R	153	2015-10-11	0	0	153
48136	S153_R	153	2015-10-11	0	0	153
50572	S153	153	2015-10-11	0	0	153
53008	S46	46	2015-10-11	0	0	46
55444	S49	49	2015-10-11	0.01	0.0254	49
2111	S153	153	2015-10-12	0	0	153
4547	S46	46	2015-10-12	0	0	46
6983	S49	49	2015-10-12	0	0	49
8811	S386B_R	386	2015-10-12	0	0	386
11247	S154_R	154	2015-10-12	0	0	154
13663	S386B_R	386	2015-10-12	0	0	386
16147	S70_R	70	2015-10-12	0.34	0.8636	70
18631	S70_R	70	2015-10-12	0	0	70
21004	S70_R	70	2015-10-12	0	0	70
23488	S80_R	80	2015-10-12	0	0	80
25972	S75_R	75	2015-10-12	0	0	75
28456	S72_R	72	2015-10-12	0	0	72
30892	S75_R	75	2015-10-12	0	0	75
33328	S84	84	2015-10-12	0.04	0.1016	84
35812	S97_R	97	2015-10-12	0	0	97
38296	S84_R	84	2015-10-12	0	0	84
40732	S97_R	97	2015-10-12	0	0	97
43168	S153_R	153	2015-10-12	0	0	153
45653	S153_R	153	2015-10-12	0	0	153
48137	S153_R	153	2015-10-12	0	0	153
50573	S153	153	2015-10-12	0	0	153
53009	S46	46	2015-10-12	0	0	46
55445	S49	49	2015-10-12	0	0	49
2112	S153	153	2015-10-13	0	0	153
4548	S46	46	2015-10-13	0	0	46
6984	S49	49	2015-10-13	0	0	49
8812	S386B_R	386	2015-10-13	0	0	386
11248	S154_R	154	2015-10-13	0	0	154
13664	S386B_R	386	2015-10-13	0	0	386
16148	S70_R	70	2015-10-13	0	0	70
18632	S70_R	70	2015-10-13	0	0	70
21005	S70_R	70	2015-10-13	0	0	70
23489	S80_R	80	2015-10-13	0.08	0.2032	80
25973	S75_R	75	2015-10-13	0	0	75
28457	S72_R	72	2015-10-13	0	0	72
30893	S75_R	75	2015-10-13	0	0	75
33329	S84	84	2015-10-13	0	0	84
35813	S97_R	97	2015-10-13	0	0	97
38297	S84_R	84	2015-10-13	0	0	84
40733	S97_R	97	2015-10-13	0.11	0.2794	97
43169	S153_R	153	2015-10-13	0	0	153
45654	S153_R	153	2015-10-13	0	0	153
48138	S153_R	153	2015-10-13	0	0	153
50574	S153	153	2015-10-13	0	0	153
53010	S46	46	2015-10-13	0	0	46
55446	S49	49	2015-10-13	0	0	49
2113	S153	153	2015-10-14	0	0	153
4549	S46	46	2015-10-14	0	0	46
6985	S49	49	2015-10-14	0	0	49
8813	S386B_R	386	2015-10-14	0	0	386
11249	S154_R	154	2015-10-14	0.01	0.0254	154
13665	S386B_R	386	2015-10-14	0	0	386
16149	S70_R	70	2015-10-14	0	0	70
18633	S70_R	70	2015-10-14	0	0	70
21006	S70_R	70	2015-10-14	0	0	70
23490	S80_R	80	2015-10-14	0	0	80
25974	S75_R	75	2015-10-14	0	0	75
28458	S72_R	72	2015-10-14	0.01	0.0254	72
30894	S75_R	75	2015-10-14	0	0	75
33330	S84	84	2015-10-14	0	0	84
35814	S97_R	97	2015-10-14	0.12	0.3048	97
38298	S84_R	84	2015-10-14	0	0	84
40734	S97_R	97	2015-10-14	0.01	0.0254	97
43170	S153_R	153	2015-10-14	0	0	153
45655	S153_R	153	2015-10-14	0	0	153
48139	S153_R	153	2015-10-14	0	0	153
50575	S153	153	2015-10-14	0	0	153
53011	S46	46	2015-10-14	0	0	46
55447	S49	49	2015-10-14	0	0	49
2114	S153	153	2015-10-15	0	0	153
4550	S46	46	2015-10-15	0.01	0.025	46
6986	S49	49	2015-10-15	0	0	49
8814	S386B_R	386	2015-10-15	0	0	386
11250	S154_R	154	2015-10-15	0	0	154
13666	S386B_R	386	2015-10-15	0	0	386
16150	S70_R	70	2015-10-15	0	0	70
18634	S70_R	70	2015-10-15	0	0	70
21007	S70_R	70	2015-10-15	0	0	70
23491	S80_R	80	2015-10-15	0	0	80
25975	S75_R	75	2015-10-15	0	0	75
28459	S72_R	72	2015-10-15	0	0	72
30895	S75_R	75	2015-10-15	0	0	75
33331	S84	84	2015-10-15	0	0	84
35815	S97_R	97	2015-10-15	0	0	97
38299	S84_R	84	2015-10-15	0	0	84
40735	S97_R	97	2015-10-15	0	0	97
43171	S153_R	153	2015-10-15	0	0	153
45656	S153_R	153	2015-10-15	0	0	153
48140	S153_R	153	2015-10-15	0	0	153
50576	S153	153	2015-10-15	0	0	153
53012	S46	46	2015-10-15	0.01	0.0254	46
55448	S49	49	2015-10-15	0	0	49
2115	S153	153	2015-10-16	0	0	153
4551	S46	46	2015-10-16	0	0	46
6987	S49	49	2015-10-16	0	0	49
8815	S386B_R	386	2015-10-16	0	0	386
11251	S154_R	154	2015-10-16	0	0	154
13667	S386B_R	386	2015-10-16	0	0	386
16151	S70_R	70	2015-10-16	0	0	70
18635	S70_R	70	2015-10-16	0	0	70
21008	S70_R	70	2015-10-16	0	0	70
23492	S80_R	80	2015-10-16	0.01	0.0254	80
25976	S75_R	75	2015-10-16	0	0	75
28460	S72_R	72	2015-10-16	0	0	72
30896	S75_R	75	2015-10-16	0	0	75
33332	S84	84	2015-10-16	0	0	84
35816	S97_R	97	2015-10-16	0	0	97
38300	S84_R	84	2015-10-16	0	0	84
40736	S97_R	97	2015-10-16	0	0	97
43172	S153_R	153	2015-10-16	0	0	153
45657	S153_R	153	2015-10-16	0	0	153
48141	S153_R	153	2015-10-16	0	0	153
50577	S153	153	2015-10-16	0	0	153
53013	S46	46	2015-10-16	0	0	46
55449	S49	49	2015-10-16	0	0	49
2116	S153	153	2015-10-17	0	0	153
4552	S46	46	2015-10-17	0	0	46
6988	S49	49	2015-10-17	0	0	49
8816	S386B_R	386	2015-10-17	0	0	386
11252	S154_R	154	2015-10-17	0	0	154
13668	S386B_R	386	2015-10-17	0	0	386
16152	S70_R	70	2015-10-17	0	0	70
18636	S70_R	70	2015-10-17	0	0	70
21009	S70_R	70	2015-10-17	0	0	70
23493	S80_R	80	2015-10-17	0.96	2.4384	80
25977	S75_R	75	2015-10-17	0	0	75
28461	S72_R	72	2015-10-17	0	0	72
30897	S75_R	75	2015-10-17	0	0	75
33333	S84	84	2015-10-17	0	0	84
35817	S97_R	97	2015-10-17	0	0	97
38301	S84_R	84	2015-10-17	0	0	84
40737	S97_R	97	2015-10-17	0	0	97
43173	S153_R	153	2015-10-17	0	0	153
45658	S153_R	153	2015-10-17	0	0	153
48142	S153_R	153	2015-10-17	0	0	153
50578	S153	153	2015-10-17	0	0	153
53014	S46	46	2015-10-17	0	0	46
55450	S49	49	2015-10-17	0	0	49
2117	S153	153	2015-10-18	0.04	0.102	153
4553	S46	46	2015-10-18	0	0	46
6989	S49	49	2015-10-18	0.01	0.025	49
8817	S386B_R	386	2015-10-18	0	0	386
11253	S154_R	154	2015-10-18	0	0	154
13669	S386B_R	386	2015-10-18	0	0	386
16153	S70_R	70	2015-10-18	0	0	70
18637	S70_R	70	2015-10-18	0	0	70
21010	S70_R	70	2015-10-18	0	0	70
23494	S80_R	80	2015-10-18	0	0	80
25978	S75_R	75	2015-10-18	0.01	0.0254	75
28462	S72_R	72	2015-10-18	0	0	72
30898	S75_R	75	2015-10-18	0.01	0.0254	75
33334	S84	84	2015-10-18	0	0	84
35818	S97_R	97	2015-10-18	0	0	97
38302	S84_R	84	2015-10-18	0	0	84
40738	S97_R	97	2015-10-18	0	0	97
43174	S153_R	153	2015-10-18	0	0	153
45659	S153_R	153	2015-10-18	0.04	0.1016	153
48143	S153_R	153	2015-10-18	0.04	0.1016	153
50579	S153	153	2015-10-18	0.04	0.1016	153
53015	S46	46	2015-10-18	0	0	46
55451	S49	49	2015-10-18	0.01	0.0254	49
2118	S153	153	2015-10-19	0	0	153
4554	S46	46	2015-10-19	0	0	46
6990	S49	49	2015-10-19	0	0	49
8818	S386B_R	386	2015-10-19	0	0	386
11254	S154_R	154	2015-10-19	0	0	154
13670	S386B_R	386	2015-10-19	0	0	386
16154	S70_R	70	2015-10-19	0	0	70
18638	S70_R	70	2015-10-19	0	0	70
21011	S70_R	70	2015-10-19	0	0	70
23495	S80_R	80	2015-10-19	0	0	80
25979	S75_R	75	2015-10-19	0	0	75
28463	S72_R	72	2015-10-19	0	0	72
30899	S75_R	75	2015-10-19	0	0	75
33335	S84	84	2015-10-19	0	0	84
35819	S97_R	97	2015-10-19	0	0	97
38303	S84_R	84	2015-10-19	0	0	84
40739	S97_R	97	2015-10-19	0	0	97
43175	S153_R	153	2015-10-19	0.04	0.1016	153
45660	S153_R	153	2015-10-19	0	0	153
48144	S153_R	153	2015-10-19	0	0	153
50580	S153	153	2015-10-19	0	0	153
53016	S46	46	2015-10-19	0	0	46
55452	S49	49	2015-10-19	0	0	49
2119	S153	153	2015-10-20	0	0	153
4555	S46	46	2015-10-20	0	0	46
6991	S49	49	2015-10-20	0	0	49
8819	S386B_R	386	2015-10-20	0	0	386
11255	S154_R	154	2015-10-20	0	0	154
13671	S386B_R	386	2015-10-20	0	0	386
16155	S70_R	70	2015-10-20	0	0	70
18639	S70_R	70	2015-10-20	0	0	70
21012	S70_R	70	2015-10-20	0	0	70
23496	S80_R	80	2015-10-20	0.01	0.0254	80
25980	S75_R	75	2015-10-20	0	0	75
28464	S72_R	72	2015-10-20	0	0	72
30900	S75_R	75	2015-10-20	0	0	75
33336	S84	84	2015-10-20	0	0	84
35820	S97_R	97	2015-10-20	0	0	97
38304	S84_R	84	2015-10-20	0	0	84
40740	S97_R	97	2015-10-20	0	0	97
43176	S153_R	153	2015-10-20	0	0	153
45661	S153_R	153	2015-10-20	0	0	153
48145	S153_R	153	2015-10-20	0	0	153
50581	S153	153	2015-10-20	0	0	153
53017	S46	46	2015-10-20	0	0	46
55453	S49	49	2015-10-20	0	0	49
2120	S153	153	2015-10-21	0.01	0.025	153
4556	S46	46	2015-10-21	0.23	0.584	46
6992	S49	49	2015-10-21	0.01	0.025	49
8820	S386B_R	386	2015-10-21	0	0	386
11256	S154_R	154	2015-10-21	0.05	0.127	154
13672	S386B_R	386	2015-10-21	0	0	386
16156	S70_R	70	2015-10-21	0.02	0.0508	70
18640	S70_R	70	2015-10-21	0.02	0.0508	70
21013	S70_R	70	2015-10-21	0.02	0.0508	70
23497	S80_R	80	2015-10-21	0.04	0.1016	80
25981	S75_R	75	2015-10-21	0.04	0.1016	75
28465	S72_R	72	2015-10-21	0	0	72
30901	S75_R	75	2015-10-21	0.04	0.1016	75
33337	S84	84	2015-10-21	0	0	84
35821	S97_R	97	2015-10-21	0	0	97
38305	S84_R	84	2015-10-21	0	0	84
40741	S97_R	97	2015-10-21	0.04	0.1016	97
43177	S153_R	153	2015-10-21	0	0	153
45662	S153_R	153	2015-10-21	0.01	0.0254	153
48146	S153_R	153	2015-10-21	0.01	0.0254	153
50582	S153	153	2015-10-21	0.01	0.0254	153
53018	S46	46	2015-10-21	0.23	0.5842	46
55454	S49	49	2015-10-21	0.01	0.0254	49
2121	S153	153	2015-10-22	0.03	0.076	153
4557	S46	46	2015-10-22	0.12	0.305	46
6993	S49	49	2015-10-22	0.35	0.889	49
8821	S386B_R	386	2015-10-22	0	0	386
11257	S154_R	154	2015-10-22	0.01	0.0254	154
13673	S386B_R	386	2015-10-22	0	0	386
16157	S70_R	70	2015-10-22	0	0	70
18641	S70_R	70	2015-10-22	0	0	70
21014	S70_R	70	2015-10-22	0	0	70
23498	S80_R	80	2015-10-22	0.28	0.7112	80
25982	S75_R	75	2015-10-22	0	0	75
28466	S72_R	72	2015-10-22	0	0	72
30902	S75_R	75	2015-10-22	0	0	75
33338	S84	84	2015-10-22	0	0	84
35822	S97_R	97	2015-10-22	0.08	0.2032	97
38306	S84_R	84	2015-10-22	0.02	0.0508	84
40742	S97_R	97	2015-10-22	0.25	0.635	97
43178	S153_R	153	2015-10-22	0.01	0.0254	153
45663	S153_R	153	2015-10-22	0.03	0.0762	153
48147	S153_R	153	2015-10-22	0.03	0.0762	153
50583	S153	153	2015-10-22	0.03	0.0762	153
53019	S46	46	2015-10-22	0.12	0.3048	46
55455	S49	49	2015-10-22	0.35	0.889	49
2122	S153	153	2015-10-23	0.03	0.076	153
4558	S46	46	2015-10-23	0	0	46
6994	S49	49	2015-10-23	0.16	0.406	49
8822	S386B_R	386	2015-10-23	0.08	0.2032	386
11258	S154_R	154	2015-10-23	0.09	0.2286	154
13674	S386B_R	386	2015-10-23	0.08	0.2032	386
16158	S70_R	70	2015-10-23	0.06	0.1524	70
18642	S70_R	70	2015-10-23	0.07	0.1778	70
21015	S70_R	70	2015-10-23	0.07	0.1778	70
23499	S80_R	80	2015-10-23	0.07	0.1778	80
25983	S75_R	75	2015-10-23	0.05	0.127	75
28467	S72_R	72	2015-10-23	0.11	0.2794	72
30903	S75_R	75	2015-10-23	0.05	0.127	75
33339	S84	84	2015-10-23	0.11	0.2794	84
35823	S97_R	97	2015-10-23	0.51	1.2954	97
38307	S84_R	84	2015-10-23	0.09	0.2286	84
40743	S97_R	97	2015-10-23	0.3	0.762	97
43179	S153_R	153	2015-10-23	0.03	0.0762	153
45664	S153_R	153	2015-10-23	0.03	0.0762	153
48148	S153_R	153	2015-10-23	0.03	0.0762	153
50584	S153	153	2015-10-23	0.03	0.0762	153
53020	S46	46	2015-10-23	0	0	46
55456	S49	49	2015-10-23	0.16	0.4064	49
2123	S153	153	2015-10-24	0	0	153
4559	S46	46	2015-10-24	0	0	46
6995	S49	49	2015-10-24	0	0	49
8823	S386B_R	386	2015-10-24	0	0	386
11259	S154_R	154	2015-10-24	0	0	154
13675	S386B_R	386	2015-10-24	0	0	386
16159	S70_R	70	2015-10-24	0.01	0.0254	70
18643	S70_R	70	2015-10-24	0	0	70
21016	S70_R	70	2015-10-24	0	0	70
23500	S80_R	80	2015-10-24	0	0	80
25984	S75_R	75	2015-10-24	0	0	75
28468	S72_R	72	2015-10-24	0	0	72
30904	S75_R	75	2015-10-24	0	0	75
33340	S84	84	2015-10-24	0	0	84
35824	S97_R	97	2015-10-24	0.02	0.0508	97
38308	S84_R	84	2015-10-24	0	0	84
40744	S97_R	97	2015-10-24	0.02	0.0508	97
43180	S153_R	153	2015-10-24	0.03	0.0762	153
45665	S153_R	153	2015-10-24	0	0	153
48149	S153_R	153	2015-10-24	0	0	153
50585	S153	153	2015-10-24	0	0	153
53021	S46	46	2015-10-24	0	0	46
55457	S49	49	2015-10-24	0	0	49
2124	S153	153	2015-10-25	0	0	153
4560	S46	46	2015-10-25	0	0	46
6996	S49	49	2015-10-25	0	0	49
8824	S386B_R	386	2015-10-25	0	0	386
11260	S154_R	154	2015-10-25	0.01	0.0254	154
13676	S386B_R	386	2015-10-25	0	0	386
16160	S70_R	70	2015-10-25	0	0	70
18644	S70_R	70	2015-10-25	0	0	70
21017	S70_R	70	2015-10-25	0	0	70
23501	S80_R	80	2015-10-25	0	0	80
25985	S75_R	75	2015-10-25	0	0	75
28469	S72_R	72	2015-10-25	0	0	72
30905	S75_R	75	2015-10-25	0	0	75
33341	S84	84	2015-10-25	0	0	84
35825	S97_R	97	2015-10-25	0.01	0.0254	97
38309	S84_R	84	2015-10-25	0	0	84
40745	S97_R	97	2015-10-25	0.01	0.0254	97
43181	S153_R	153	2015-10-25	0	0	153
45666	S153_R	153	2015-10-25	0	0	153
48150	S153_R	153	2015-10-25	0	0	153
50586	S153	153	2015-10-25	0	0	153
53022	S46	46	2015-10-25	0	0	46
55458	S49	49	2015-10-25	0	0	49
2125	S153	153	2015-10-26	0.01	0.025	153
4561	S46	46	2015-10-26	0	0	46
6997	S49	49	2015-10-26	0	0	49
8825	S386B_R	386	2015-10-26	0.01	0.0254	386
11261	S154_R	154	2015-10-26	0	0	154
13677	S386B_R	386	2015-10-26	0.01	0.0254	386
16161	S70_R	70	2015-10-26	0	0	70
18645	S70_R	70	2015-10-26	0	0	70
21018	S70_R	70	2015-10-26	0	0	70
23502	S80_R	80	2015-10-26	0	0	80
25986	S75_R	75	2015-10-26	0	0	75
28470	S72_R	72	2015-10-26	0	0	72
30906	S75_R	75	2015-10-26	0	0	75
33342	S84	84	2015-10-26	0	0	84
35826	S97_R	97	2015-10-26	0	0	97
38310	S84_R	84	2015-10-26	0	0	84
40746	S97_R	97	2015-10-26	0.01	0.0254	97
43182	S153_R	153	2015-10-26	0	0	153
45667	S153_R	153	2015-10-26	0.01	0.0254	153
48151	S153_R	153	2015-10-26	0.01	0.0254	153
50587	S153	153	2015-10-26	0.01	0.0254	153
53023	S46	46	2015-10-26	0	0	46
55459	S49	49	2015-10-26	0	0	49
2126	S153	153	2015-10-27	0.01	0.025	153
4562	S46	46	2015-10-27	0.01	0.025	46
6998	S49	49	2015-10-27	0	0	49
8826	S386B_R	386	2015-10-27	0	0	386
11262	S154_R	154	2015-10-27	0	0	154
13678	S386B_R	386	2015-10-27	0	0	386
16162	S70_R	70	2015-10-27	0	0	70
18646	S70_R	70	2015-10-27	0	0	70
21019	S70_R	70	2015-10-27	0	0	70
23503	S80_R	80	2015-10-27	0	0	80
25987	S75_R	75	2015-10-27	0	0	75
28471	S72_R	72	2015-10-27	0	0	72
30907	S75_R	75	2015-10-27	0	0	75
33343	S84	84	2015-10-27	0	0	84
35827	S97_R	97	2015-10-27	0.01	0.0254	97
38311	S84_R	84	2015-10-27	0	0	84
40747	S97_R	97	2015-10-27	0	0	97
43183	S153_R	153	2015-10-27	0.01	0.0254	153
45668	S153_R	153	2015-10-27	0.01	0.0254	153
48152	S153_R	153	2015-10-27	0.01	0.0254	153
50588	S153	153	2015-10-27	0.01	0.0254	153
53024	S46	46	2015-10-27	0.01	0.0254	46
55460	S49	49	2015-10-27	0	0	49
2127	S153	153	2015-10-28	0	0	153
4563	S46	46	2015-10-28	0.01	0.025	46
6999	S49	49	2015-10-28	0.02	0.051	49
8827	S386B_R	386	2015-10-28	0	0	386
11263	S154_R	154	2015-10-28	0.09	0.2286	154
13679	S386B_R	386	2015-10-28	0	0	386
16163	S70_R	70	2015-10-28	0.49	1.2446	70
18647	S70_R	70	2015-10-28	0.51	1.2954	70
21020	S70_R	70	2015-10-28	0.51	1.2954	70
23504	S80_R	80	2015-10-28	0	0	80
25988	S75_R	75	2015-10-28	0.79	2.0066	75
28472	S72_R	72	2015-10-28	0.03	0.0762	72
30908	S75_R	75	2015-10-28	0.79	2.0066	75
33344	S84	84	2015-10-28	0.33	0.8382	84
35828	S97_R	97	2015-10-28	0	0	97
38312	S84_R	84	2015-10-28	0.34	0.8636	84
40748	S97_R	97	2015-10-28	0.32	0.8128	97
43184	S153_R	153	2015-10-28	0.01	0.0254	153
45669	S153_R	153	2015-10-28	0	0	153
48153	S153_R	153	2015-10-28	0	0	153
50589	S153	153	2015-10-28	0	0	153
53025	S46	46	2015-10-28	0.01	0.0254	46
55461	S49	49	2015-10-28	0.02	0.0508	49
2128	S153	153	2015-10-29	0	0	153
4564	S46	46	2015-10-29	0	0	46
7000	S49	49	2015-10-29	0.02	0.051	49
8828	S386B_R	386	2015-10-29	0	0	386
11264	S154_R	154	2015-10-29	0	0	154
13680	S386B_R	386	2015-10-29	0	0	386
16164	S70_R	70	2015-10-29	0.02	0.0508	70
18648	S70_R	70	2015-10-29	0	0	70
21021	S70_R	70	2015-10-29	0	0	70
23505	S80_R	80	2015-10-29	0	0	80
25989	S75_R	75	2015-10-29	0.01	0.0254	75
28473	S72_R	72	2015-10-29	0	0	72
30909	S75_R	75	2015-10-29	0.01	0.0254	75
33345	S84	84	2015-10-29	0.01	0.0254	84
35829	S97_R	97	2015-10-29	0.32	0.8128	97
38313	S84_R	84	2015-10-29	0	0	84
40749	S97_R	97	2015-10-29	0.01	0.0254	97
43185	S153_R	153	2015-10-29	0	0	153
45670	S153_R	153	2015-10-29	0	0	153
48154	S153_R	153	2015-10-29	0	0	153
50590	S153	153	2015-10-29	0	0	153
53026	S46	46	2015-10-29	0	0	46
55462	S49	49	2015-10-29	0.02	0.0508	49
2129	S153	153	2015-10-30	0	0	153
4565	S46	46	2015-10-30	0	0	46
7001	S49	49	2015-10-30	0	0	49
8829	S386B_R	386	2015-10-30	0	0	386
11265	S154_R	154	2015-10-30	0	0	154
13681	S386B_R	386	2015-10-30	0	0	386
16165	S70_R	70	2015-10-30	0	0	70
18649	S70_R	70	2015-10-30	0	0	70
21022	S70_R	70	2015-10-30	0	0	70
23506	S80_R	80	2015-10-30	0	0	80
25990	S75_R	75	2015-10-30	0	0	75
28474	S72_R	72	2015-10-30	0	0	72
30910	S75_R	75	2015-10-30	0	0	75
33346	S84	84	2015-10-30	0	0	84
35830	S97_R	97	2015-10-30	0.01	0.0254	97
38314	S84_R	84	2015-10-30	0	0	84
40750	S97_R	97	2015-10-30	0	0	97
43186	S153_R	153	2015-10-30	0	0	153
45671	S153_R	153	2015-10-30	0	0	153
48155	S153_R	153	2015-10-30	0	0	153
50591	S153	153	2015-10-30	0	0	153
53027	S46	46	2015-10-30	0	0	46
55463	S49	49	2015-10-30	0	0	49
2130	S153	153	2015-10-31	0	0	153
4566	S46	46	2015-10-31	0	0	46
7002	S49	49	2015-10-31	0	0	49
8830	S386B_R	386	2015-10-31	0	0	386
11266	S154_R	154	2015-10-31	0	0	154
13682	S386B_R	386	2015-10-31	0	0	386
16166	S70_R	70	2015-10-31	0	0	70
18650	S70_R	70	2015-10-31	0	0	70
21023	S70_R	70	2015-10-31	0	0	70
23507	S80_R	80	2015-10-31	0	0	80
25991	S75_R	75	2015-10-31	0	0	75
28475	S72_R	72	2015-10-31	0	0	72
30911	S75_R	75	2015-10-31	0	0	75
33347	S84	84	2015-10-31	0	0	84
35831	S97_R	97	2015-10-31	0	0	97
38315	S84_R	84	2015-10-31	0	0	84
40751	S97_R	97	2015-10-31	0	0	97
43187	S153_R	153	2015-10-31	0	0	153
45672	S153_R	153	2015-10-31	0	0	153
48156	S153_R	153	2015-10-31	0	0	153
50592	S153	153	2015-10-31	0	0	153
53028	S46	46	2015-10-31	0	0	46
55464	S49	49	2015-10-31	0	0	49
2131	S153	153	2015-11-01	0	0	153
4567	S46	46	2015-11-01	0	0	46
7003	S49	49	2015-11-01	0	0	49
8831	S386B_R	386	2015-11-01	0	0	386
11267	S154_R	154	2015-11-01	0	0	154
13683	S386B_R	386	2015-11-01	0	0	386
16167	S70_R	70	2015-11-01	0	0	70
18651	S70_R	70	2015-11-01	0	0	70
21024	S70_R	70	2015-11-01	0	0	70
23508	S80_R	80	2015-11-01	0	0	80
25992	S75_R	75	2015-11-01	0	0	75
28476	S72_R	72	2015-11-01	0	0	72
30912	S75_R	75	2015-11-01	0	0	75
33348	S84	84	2015-11-01	0	0	84
35832	S97_R	97	2015-11-01	0	0	97
38316	S84_R	84	2015-11-01	0	0	84
40752	S97_R	97	2015-11-01	0	0	97
43188	S153_R	153	2015-11-01	0	0	153
45673	S153_R	153	2015-11-01	0	0	153
48157	S153_R	153	2015-11-01	0	0	153
50593	S153	153	2015-11-01	0	0	153
53029	S46	46	2015-11-01	0	0	46
55465	S49	49	2015-11-01	0	0	49
2132	S153	153	2015-11-02	0	0	153
4568	S46	46	2015-11-02	0	0	46
7004	S49	49	2015-11-02	0	0	49
8832	S386B_R	386	2015-11-02	0	0	386
11268	S154_R	154	2015-11-02	0	0	154
13684	S386B_R	386	2015-11-02	0	0	386
16168	S70_R	70	2015-11-02	0.01	0.0254	70
18652	S70_R	70	2015-11-02	0.01	0.0254	70
21025	S70_R	70	2015-11-02	0.01	0.0254	70
23509	S80_R	80	2015-11-02	0	0	80
25993	S75_R	75	2015-11-02	0	0	75
28477	S72_R	72	2015-11-02	0	0	72
30913	S75_R	75	2015-11-02	0	0	75
33349	S84	84	2015-11-02	0	0	84
35833	S97_R	97	2015-11-02	0	0	97
38317	S84_R	84	2015-11-02	0	0	84
40753	S97_R	97	2015-11-02	0	0	97
43189	S153_R	153	2015-11-02	0	0	153
45674	S153_R	153	2015-11-02	0	0	153
48158	S153_R	153	2015-11-02	0	0	153
50594	S153	153	2015-11-02	0	0	153
53030	S46	46	2015-11-02	0	0	46
55466	S49	49	2015-11-02	0	0	49
2133	S153	153	2015-11-03	0	0	153
4569	S46	46	2015-11-03	0	0	46
7005	S49	49	2015-11-03	0	0	49
8833	S386B_R	386	2015-11-03	0	0	386
11269	S154_R	154	2015-11-03	0	0	154
13685	S386B_R	386	2015-11-03	0	0	386
16169	S70_R	70	2015-11-03	0	0	70
18653	S70_R	70	2015-11-03	0	0	70
21026	S70_R	70	2015-11-03	0	0	70
23510	S80_R	80	2015-11-03	0	0	80
25994	S75_R	75	2015-11-03	0	0	75
28478	S72_R	72	2015-11-03	0	0	72
30914	S75_R	75	2015-11-03	0	0	75
33350	S84	84	2015-11-03	0	0	84
35834	S97_R	97	2015-11-03	0	0	97
38318	S84_R	84	2015-11-03	0	0	84
40754	S97_R	97	2015-11-03	0	0	97
43190	S153_R	153	2015-11-03	0	0	153
45675	S153_R	153	2015-11-03	0	0	153
48159	S153_R	153	2015-11-03	0	0	153
50595	S153	153	2015-11-03	0	0	153
53031	S46	46	2015-11-03	0	0	46
55467	S49	49	2015-11-03	0	0	49
2134	S153	153	2015-11-04	0	0	153
4570	S46	46	2015-11-04	0	0	46
7006	S49	49	2015-11-04	0.03	0.076	49
8834	S386B_R	386	2015-11-04	0	0	386
11270	S154_R	154	2015-11-04	0	0	154
13686	S386B_R	386	2015-11-04	0	0	386
16170	S70_R	70	2015-11-04	0	0	70
18654	S70_R	70	2015-11-04	0	0	70
21027	S70_R	70	2015-11-04	0	0	70
23511	S80_R	80	2015-11-04	0	0	80
25995	S75_R	75	2015-11-04	0	0	75
28479	S72_R	72	2015-11-04	0	0	72
30915	S75_R	75	2015-11-04	0	0	75
33351	S84	84	2015-11-04	0	0	84
35835	S97_R	97	2015-11-04	0	0	97
38319	S84_R	84	2015-11-04	0.01	0.0254	84
40755	S97_R	97	2015-11-04	0.27	0.6858	97
43191	S153_R	153	2015-11-04	0	0	153
45676	S153_R	153	2015-11-04	0	0	153
48160	S153_R	153	2015-11-04	0	0	153
50596	S153	153	2015-11-04	0	0	153
53032	S46	46	2015-11-04	0	0	46
55468	S49	49	2015-11-04	0.03	0.0762	49
2135	S153	153	2015-11-05	0	0	153
4571	S46	46	2015-11-05	0	0	46
7007	S49	49	2015-11-05	0	0	49
8835	S386B_R	386	2015-11-05	0	0	386
11271	S154_R	154	2015-11-05	0	0	154
13687	S386B_R	386	2015-11-05	0	0	386
16171	S70_R	70	2015-11-05	0	0	70
18655	S70_R	70	2015-11-05	0	0	70
21028	S70_R	70	2015-11-05	0	0	70
23512	S80_R	80	2015-11-05	0	0	80
25996	S75_R	75	2015-11-05	0	0	75
28480	S72_R	72	2015-11-05	0	0	72
30916	S75_R	75	2015-11-05	0	0	75
33352	S84	84	2015-11-05	0.01	0.0254	84
35836	S97_R	97	2015-11-05	0.27	0.6858	97
38320	S84_R	84	2015-11-05	0	0	84
40756	S97_R	97	2015-11-05	0	0	97
43192	S153_R	153	2015-11-05	0	0	153
45677	S153_R	153	2015-11-05	0	0	153
48161	S153_R	153	2015-11-05	0	0	153
50597	S153	153	2015-11-05	0	0	153
53033	S46	46	2015-11-05	0	0	46
55469	S49	49	2015-11-05	0	0	49
2136	S153	153	2015-11-06	0.01	0.025	153
4572	S46	46	2015-11-06	0	0	46
7008	S49	49	2015-11-06	0	0	49
8836	S386B_R	386	2015-11-06	0.01	0.0254	386
11272	S154_R	154	2015-11-06	0	0	154
13688	S386B_R	386	2015-11-06	0.01	0.0254	386
16172	S70_R	70	2015-11-06	0	0	70
18656	S70_R	70	2015-11-06	0	0	70
21029	S70_R	70	2015-11-06	0	0	70
23513	S80_R	80	2015-11-06	0	0	80
25997	S75_R	75	2015-11-06	0.01	0.0254	75
28481	S72_R	72	2015-11-06	0	0	72
30917	S75_R	75	2015-11-06	0.01	0.0254	75
33353	S84	84	2015-11-06	0	0	84
35837	S97_R	97	2015-11-06	0.01	0.0254	97
38321	S84_R	84	2015-11-06	0	0	84
40757	S97_R	97	2015-11-06	0.01	0.0254	97
43193	S153_R	153	2015-11-06	0	0	153
45678	S153_R	153	2015-11-06	0.01	0.0254	153
48162	S153_R	153	2015-11-06	0.01	0.0254	153
50598	S153	153	2015-11-06	0.01	0.0254	153
53034	S46	46	2015-11-06	0	0	46
55470	S49	49	2015-11-06	0	0	49
2137	S153	153	2015-11-07	0	0	153
4573	S46	46	2015-11-07	0.07	0.178	46
7009	S49	49	2015-11-07	0.03	0.076	49
8837	S386B_R	386	2015-11-07	0	0	386
11273	S154_R	154	2015-11-07	0	0	154
13689	S386B_R	386	2015-11-07	0	0	386
16173	S70_R	70	2015-11-07	0	0	70
18657	S70_R	70	2015-11-07	0	0	70
21030	S70_R	70	2015-11-07	0	0	70
23514	S80_R	80	2015-11-07	0	0	80
25998	S75_R	75	2015-11-07	0	0	75
28482	S72_R	72	2015-11-07	0	0	72
30918	S75_R	75	2015-11-07	0	0	75
33354	S84	84	2015-11-07	0	0	84
35838	S97_R	97	2015-11-07	0	0	97
38322	S84_R	84	2015-11-07	0	0	84
40758	S97_R	97	2015-11-07	0	0	97
43194	S153_R	153	2015-11-07	0.01	0.0254	153
45679	S153_R	153	2015-11-07	0	0	153
48163	S153_R	153	2015-11-07	0	0	153
50599	S153	153	2015-11-07	0	0	153
53035	S46	46	2015-11-07	0.07	0.1778	46
55471	S49	49	2015-11-07	0.03	0.0762	49
2138	S153	153	2015-11-08	0	0	153
4574	S46	46	2015-11-08	0	0	46
7010	S49	49	2015-11-08	0	0	49
8838	S386B_R	386	2015-11-08	0	0	386
11274	S154_R	154	2015-11-08	0	0	154
13690	S386B_R	386	2015-11-08	0	0	386
16174	S70_R	70	2015-11-08	0	0	70
18658	S70_R	70	2015-11-08	0	0	70
21031	S70_R	70	2015-11-08	0	0	70
23515	S80_R	80	2015-11-08	0	0	80
25999	S75_R	75	2015-11-08	0	0	75
28483	S72_R	72	2015-11-08	0	0	72
30919	S75_R	75	2015-11-08	0	0	75
33355	S84	84	2015-11-08	0	0	84
35839	S97_R	97	2015-11-08	0.01	0.0254	97
38323	S84_R	84	2015-11-08	0	0	84
40759	S97_R	97	2015-11-08	0.01	0.0254	97
43195	S153_R	153	2015-11-08	0	0	153
45680	S153_R	153	2015-11-08	0	0	153
48164	S153_R	153	2015-11-08	0	0	153
50600	S153	153	2015-11-08	0	0	153
53036	S46	46	2015-11-08	0	0	46
55472	S49	49	2015-11-08	0	0	49
2139	S153	153	2015-11-09	0.01	0.025	153
4575	S46	46	2015-11-09	0	0	46
7011	S49	49	2015-11-09	0	0	49
8839	S386B_R	386	2015-11-09	0	0	386
11275	S154_R	154	2015-11-09	0.02	0.0508	154
13691	S386B_R	386	2015-11-09	0	0	386
16175	S70_R	70	2015-11-09	0	0	70
18659	S70_R	70	2015-11-09	0.42	1.0668	70
21032	S70_R	70	2015-11-09	0.42	1.0668	70
23516	S80_R	80	2015-11-09	0	0	80
26000	S75_R	75	2015-11-09	0.09	0.2286	75
28484	S72_R	72	2015-11-09	0.01	0.0254	72
30920	S75_R	75	2015-11-09	0.09	0.2286	75
33356	S84	84	2015-11-09	0	0	84
35840	S97_R	97	2015-11-09	0	0	97
38324	S84_R	84	2015-11-09	0.04	0.1016	84
40760	S97_R	97	2015-11-09	0	0	97
43196	S153_R	153	2015-11-09	0	0	153
45681	S153_R	153	2015-11-09	0.01	0.0254	153
48165	S153_R	153	2015-11-09	0.01	0.0254	153
50601	S153	153	2015-11-09	0.01	0.0254	153
53037	S46	46	2015-11-09	0	0	46
55473	S49	49	2015-11-09	0	0	49
2140	S153	153	2015-11-10	0.05	0.127	153
4576	S46	46	2015-11-10	0	0	46
7012	S49	49	2015-11-10	0	0	49
8840	S386B_R	386	2015-11-10	0.35	0.889	386
11276	S154_R	154	2015-11-10	0.12	0.3048	154
13692	S386B_R	386	2015-11-10	0.35	0.889	386
16176	S70_R	70	2015-11-10	0.43	1.0922	70
18660	S70_R	70	2015-11-10	1.25	3.175	70
21033	S70_R	70	2015-11-10	1.25	3.175	70
23517	S80_R	80	2015-11-10	0	0	80
26001	S75_R	75	2015-11-10	0.19	0.4826	75
28485	S72_R	72	2015-11-10	0.09	0.2286	72
30921	S75_R	75	2015-11-10	0.19	0.4826	75
33357	S84	84	2015-11-10	0.04	0.1016	84
35841	S97_R	97	2015-11-10	0.04	0.1016	97
38325	S84_R	84	2015-11-10	0.02	0.0508	84
40761	S97_R	97	2015-11-10	0.04	0.1016	97
43197	S153_R	153	2015-11-10	0.01	0.0254	153
45682	S153_R	153	2015-11-10	0.05	0.127	153
48166	S153_R	153	2015-11-10	0.05	0.127	153
50602	S153	153	2015-11-10	0.05	0.127	153
53038	S46	46	2015-11-10	0	0	46
55474	S49	49	2015-11-10	0	0	49
2141	S153	153	2015-11-11	0	0	153
4577	S46	46	2015-11-11	0.02	0.051	46
7013	S49	49	2015-11-11	0	0	49
8841	S386B_R	386	2015-11-11	0.01	0.0254	386
11277	S154_R	154	2015-11-11	0.01	0.0254	154
13693	S386B_R	386	2015-11-11	0.01	0.0254	386
16177	S70_R	70	2015-11-11	1.24	3.1496	70
18661	S70_R	70	2015-11-11	0	0	70
21034	S70_R	70	2015-11-11	0	0	70
23518	S80_R	80	2015-11-11	0	0	80
26002	S75_R	75	2015-11-11	0	0	75
28486	S72_R	72	2015-11-11	0	0	72
30922	S75_R	75	2015-11-11	0	0	75
33358	S84	84	2015-11-11	0.02	0.0508	84
35842	S97_R	97	2015-11-11	0	0	97
38326	S84_R	84	2015-11-11	0	0	84
40762	S97_R	97	2015-11-11	0	0	97
43198	S153_R	153	2015-11-11	0.05	0.127	153
45683	S153_R	153	2015-11-11	0	0	153
48167	S153_R	153	2015-11-11	0	0	153
50603	S153	153	2015-11-11	0	0	153
53039	S46	46	2015-11-11	0.02	0.0508	46
55475	S49	49	2015-11-11	0	0	49
2142	S153	153	2015-11-12	0	0	153
4578	S46	46	2015-11-12	0	0	46
7014	S49	49	2015-11-12	0	0	49
8842	S386B_R	386	2015-11-12	0	0	386
11278	S154_R	154	2015-11-12	0	0	154
13694	S386B_R	386	2015-11-12	0	0	386
16178	S70_R	70	2015-11-12	0	0	70
18662	S70_R	70	2015-11-12	0	0	70
21035	S70_R	70	2015-11-12	0	0	70
23519	S80_R	80	2015-11-12	0	0	80
26003	S75_R	75	2015-11-12	0	0	75
28487	S72_R	72	2015-11-12	0	0	72
30923	S75_R	75	2015-11-12	0	0	75
33359	S84	84	2015-11-12	0	0	84
35843	S97_R	97	2015-11-12	0	0	97
38327	S84_R	84	2015-11-12	0	0	84
40763	S97_R	97	2015-11-12	0	0	97
43199	S153_R	153	2015-11-12	0	0	153
45684	S153_R	153	2015-11-12	0	0	153
48168	S153_R	153	2015-11-12	0	0	153
50604	S153	153	2015-11-12	0	0	153
53040	S46	46	2015-11-12	0	0	46
55476	S49	49	2015-11-12	0	0	49
2143	S153	153	2015-11-13	0	0	153
4579	S46	46	2015-11-13	0.75	1.905	46
7015	S49	49	2015-11-13	0.23	0.584	49
8843	S386B_R	386	2015-11-13	0.43	1.0922	386
11279	S154_R	154	2015-11-13	0.03	0.0762	154
13695	S386B_R	386	2015-11-13	0.43	1.0922	386
16179	S70_R	70	2015-11-13	0	0	70
18663	S70_R	70	2015-11-13	0.16	0.4064	70
21036	S70_R	70	2015-11-13	0.16	0.4064	70
23520	S80_R	80	2015-11-13	0.96	2.4384	80
26004	S75_R	75	2015-11-13	0.25	0.635	75
28488	S72_R	72	2015-11-13	0.31	0.7874	72
30924	S75_R	75	2015-11-13	0.25	0.635	75
33360	S84	84	2015-11-13	0	0	84
35844	S97_R	97	2015-11-13	0	0	97
38328	S84_R	84	2015-11-13	0.23	0.5842	84
40764	S97_R	97	2015-11-13	0.31	0.7874	97
43200	S153_R	153	2015-11-13	0	0	153
45685	S153_R	153	2015-11-13	0	0	153
48169	S153_R	153	2015-11-13	0	0	153
50605	S153	153	2015-11-13	0	0	153
53041	S46	46	2015-11-13	0.75	1.905	46
55477	S49	49	2015-11-13	0.23	0.5842	49
2144	S153	153	2015-11-14	0	0	153
4580	S46	46	2015-11-14	0.02	0.051	46
7016	S49	49	2015-11-14	0	0	49
8844	S386B_R	386	2015-11-14	0	0	386
11280	S154_R	154	2015-11-14	0	0	154
13696	S386B_R	386	2015-11-14	0	0	386
16180	S70_R	70	2015-11-14	0.16	0.4064	70
18664	S70_R	70	2015-11-14	0	0	70
21037	S70_R	70	2015-11-14	0	0	70
23521	S80_R	80	2015-11-14	0	0	80
26005	S75_R	75	2015-11-14	0	0	75
28489	S72_R	72	2015-11-14	0	0	72
30925	S75_R	75	2015-11-14	0	0	75
33361	S84	84	2015-11-14	0.23	0.5842	84
35845	S97_R	97	2015-11-14	0.31	0.7874	97
38329	S84_R	84	2015-11-14	0	0	84
40765	S97_R	97	2015-11-14	0	0	97
43201	S153_R	153	2015-11-14	0	0	153
45686	S153_R	153	2015-11-14	0	0	153
48170	S153_R	153	2015-11-14	0	0	153
50606	S153	153	2015-11-14	0	0	153
53042	S46	46	2015-11-14	0.02	0.0508	46
55478	S49	49	2015-11-14	0	0	49
2145	S153	153	2015-11-15	0	0	153
4581	S46	46	2015-11-15	0	0	46
7017	S49	49	2015-11-15	0	0	49
8845	S386B_R	386	2015-11-15	0	0	386
11281	S154_R	154	2015-11-15	0	0	154
13697	S386B_R	386	2015-11-15	0	0	386
16181	S70_R	70	2015-11-15	0	0	70
18665	S70_R	70	2015-11-15	0	0	70
21038	S70_R	70	2015-11-15	0	0	70
23522	S80_R	80	2015-11-15	0	0	80
26006	S75_R	75	2015-11-15	0	0	75
28490	S72_R	72	2015-11-15	0	0	72
30926	S75_R	75	2015-11-15	0	0	75
33362	S84	84	2015-11-15	0	0	84
35846	S97_R	97	2015-11-15	0	0	97
38330	S84_R	84	2015-11-15	0	0	84
40766	S97_R	97	2015-11-15	0	0	97
43202	S153_R	153	2015-11-15	0	0	153
45687	S153_R	153	2015-11-15	0	0	153
48171	S153_R	153	2015-11-15	0	0	153
50607	S153	153	2015-11-15	0	0	153
53043	S46	46	2015-11-15	0	0	46
55479	S49	49	2015-11-15	0	0	49
2146	S153	153	2015-11-16	0	0	153
4582	S46	46	2015-11-16	0.03	0.076	46
7018	S49	49	2015-11-16	1.04	2.642	49
8846	S386B_R	386	2015-11-16	0	0	386
11282	S154_R	154	2015-11-16	0	0	154
13698	S386B_R	386	2015-11-16	0	0	386
16182	S70_R	70	2015-11-16	0	0	70
18666	S70_R	70	2015-11-16	0	0	70
21039	S70_R	70	2015-11-16	0	0	70
23523	S80_R	80	2015-11-16	0.11	0.2794	80
26007	S75_R	75	2015-11-16	0	0	75
28491	S72_R	72	2015-11-16	0	0	72
30927	S75_R	75	2015-11-16	0	0	75
33363	S84	84	2015-11-16	0	0	84
35847	S97_R	97	2015-11-16	0	0	97
38331	S84_R	84	2015-11-16	0	0	84
40767	S97_R	97	2015-11-16	2.15	5.461	97
43203	S153_R	153	2015-11-16	0	0	153
45688	S153_R	153	2015-11-16	0	0	153
48172	S153_R	153	2015-11-16	0	0	153
50608	S153	153	2015-11-16	0	0	153
53044	S46	46	2015-11-16	0.03	0.0762	46
55480	S49	49	2015-11-16	1.04	2.6416	49
2147	S153	153	2015-11-17	0	0	153
4583	S46	46	2015-11-17	0.07	0.178	46
7019	S49	49	2015-11-17	0	0	49
8847	S386B_R	386	2015-11-17	0.02	0.0508	386
11283	S154_R	154	2015-11-17	0	0	154
13699	S386B_R	386	2015-11-17	0.02	0.0508	386
16183	S70_R	70	2015-11-17	0	0	70
18667	S70_R	70	2015-11-17	0	0	70
21040	S70_R	70	2015-11-17	0	0	70
23524	S80_R	80	2015-11-17	0.28	0.7112	80
26008	S75_R	75	2015-11-17	0	0	75
28492	S72_R	72	2015-11-17	0	0	72
30928	S75_R	75	2015-11-17	0	0	75
33364	S84	84	2015-11-17	0	0	84
35848	S97_R	97	2015-11-17	2.15	5.461	97
38332	S84_R	84	2015-11-17	0	0	84
40768	S97_R	97	2015-11-17	0.01	0.0254	97
43204	S153_R	153	2015-11-17	0	0	153
45689	S153_R	153	2015-11-17	0	0	153
48173	S153_R	153	2015-11-17	0	0	153
50609	S153	153	2015-11-17	0	0	153
53045	S46	46	2015-11-17	0.07	0.1778	46
55481	S49	49	2015-11-17	0	0	49
2148	S153	153	2015-11-18	0.12	0.305	153
4584	S46	46	2015-11-18	0.2	0.508	46
7020	S49	49	2015-11-18	0.46	1.168	49
8848	S386B_R	386	2015-11-18	0.12	0.3048	386
11284	S154_R	154	2015-11-18	0.15	0.381	154
13700	S386B_R	386	2015-11-18	0.12	0.3048	386
16184	S70_R	70	2015-11-18	0.1	0.254	70
18668	S70_R	70	2015-11-18	0.1	0.254	70
21041	S70_R	70	2015-11-18	0.1	0.254	70
23525	S80_R	80	2015-11-18	0.05	0.127	80
26009	S75_R	75	2015-11-18	0	0	75
28493	S72_R	72	2015-11-18	0.01	0.0254	72
30929	S75_R	75	2015-11-18	0	0	75
33365	S84	84	2015-11-18	0.04	0.1016	84
35849	S97_R	97	2015-11-18	0.06	0.1524	97
38333	S84_R	84	2015-11-18	0.04	0.1016	84
40769	S97_R	97	2015-11-18	0.22	0.5588	97
43205	S153_R	153	2015-11-18	0.12	0.3048	153
45690	S153_R	153	2015-11-18	0.12	0.3048	153
48174	S153_R	153	2015-11-18	0.12	0.3048	153
50610	S153	153	2015-11-18	0.12	0.3048	153
53046	S46	46	2015-11-18	0.2	0.508	46
55482	S49	49	2015-11-18	0.46	1.1684	49
2149	S153	153	2015-11-19	0.19	0.483	153
4585	S46	46	2015-11-19	0.02	0.051	46
7021	S49	49	2015-11-19	0.45	1.143	49
8849	S386B_R	386	2015-11-19	0.17	0.4318	386
11285	S154_R	154	2015-11-19	1.87	4.7498	154
13701	S386B_R	386	2015-11-19	0.17	0.4318	386
16185	S70_R	70	2015-11-19	0	0	70
18669	S70_R	70	2015-11-19	2.36	5.9944	70
21042	S70_R	70	2015-11-19	NA	0	70
23526	S80_R	80	2015-11-19	0	0	80
26010	S75_R	75	2015-11-19	1.86	4.7244	75
28494	S72_R	72	2015-11-19	3.42	8.6868	72
30930	S75_R	75	2015-11-19	1.86	4.7244	75
33366	S84	84	2015-11-19	0	0	84
35850	S97_R	97	2015-11-19	0.18	0.4572	97
38334	S84_R	84	2015-11-19	1.38	3.5052	84
40770	S97_R	97	2015-11-19	0.47	1.1938	97
43206	S153_R	153	2015-11-19	0	0	153
45691	S153_R	153	2015-11-19	0.19	0.4826	153
48175	S153_R	153	2015-11-19	0.19	0.4826	153
50611	S153	153	2015-11-19	0.19	0.4826	153
53047	S46	46	2015-11-19	0.02	0.0508	46
55483	S49	49	2015-11-19	0.45	1.143	49
2150	S153	153	2015-11-20	0.01	0.025	153
4586	S46	46	2015-11-20	0.31	0.787	46
7022	S49	49	2015-11-20	1.26	3.2	49
8850	S386B_R	386	2015-11-20	0.01	0.0254	386
11286	S154_R	154	2015-11-20	0	0	154
13702	S386B_R	386	2015-11-20	0.01	0.0254	386
16186	S70_R	70	2015-11-20	0.96	2.4384	70
18670	S70_R	70	2015-11-20	0.12	0.3048	70
21043	S70_R	70	2015-11-20	NA	0	70
23527	S80_R	80	2015-11-20	0	0	80
26011	S75_R	75	2015-11-20	0	0	75
28495	S72_R	72	2015-11-20	0.01	0.0254	72
30931	S75_R	75	2015-11-20	0	0	75
33367	S84	84	2015-11-20	1.38	3.5052	84
35851	S97_R	97	2015-11-20	0.47	1.1938	97
38335	S84_R	84	2015-11-20	0.01	0.0254	84
40771	S97_R	97	2015-11-20	0.06	0.1524	97
43207	S153_R	153	2015-11-20	0.19	0.4826	153
45692	S153_R	153	2015-11-20	0.01	0.0254	153
48176	S153_R	153	2015-11-20	0.01	0.0254	153
50612	S153	153	2015-11-20	0.01	0.0254	153
53048	S46	46	2015-11-20	0.31	0.7874	46
55484	S49	49	2015-11-20	1.26	3.2004	49
2151	S153	153	2015-11-21	0.04	0.102	153
4587	S46	46	2015-11-21	2.13	5.41	46
7023	S49	49	2015-11-21	1.08	2.743	49
8851	S386B_R	386	2015-11-21	0.27	0.6858	386
11287	S154_R	154	2015-11-21	1.43	3.6322	154
13703	S386B_R	386	2015-11-21	0.27	0.6858	386
16187	S70_R	70	2015-11-21	0.26	0.6604	70
18671	S70_R	70	2015-11-21	0.5	1.27	70
21044	S70_R	70	2015-11-21	NA	0	70
23528	S80_R	80	2015-11-21	0.19	0.4826	80
26012	S75_R	75	2015-11-21	0.78	1.9812	75
28496	S72_R	72	2015-11-21	0.17	0.4318	72
30932	S75_R	75	2015-11-21	0.78	1.9812	75
33368	S84	84	2015-11-21	0.01	0.0254	84
35852	S97_R	97	2015-11-21	1.75	4.445	97
38336	S84_R	84	2015-11-21	1.52	3.8608	84
40772	S97_R	97	2015-11-21	1.86	4.7244	97
43208	S153_R	153	2015-11-21	0.01	0.0254	153
45693	S153_R	153	2015-11-21	0.04	0.1016	153
48177	S153_R	153	2015-11-21	0.04	0.1016	153
50613	S153	153	2015-11-21	0.04	0.1016	153
53049	S46	46	2015-11-21	2.13	5.4102	46
55485	S49	49	2015-11-21	1.08	2.7432	49
2152	S153	153	2015-11-22	0.76	1.93	153
4588	S46	46	2015-11-22	0.37	0.94	46
7024	S49	49	2015-11-22	0.28	0.711	49
8852	S386B_R	386	2015-11-22	1.63	4.1402	386
11288	S154_R	154	2015-11-22	0.68	1.7272	154
13704	S386B_R	386	2015-11-22	1.63	4.1402	386
16188	S70_R	70	2015-11-22	0.89	2.2606	70
18672	S70_R	70	2015-11-22	0.74	1.8796	70
21045	S70_R	70	2015-11-22	NA	0	70
23529	S80_R	80	2015-11-22	0.16	0.4064	80
26013	S75_R	75	2015-11-22	0.98	2.4892	75
28497	S72_R	72	2015-11-22	0.22	0.5588	72
30933	S75_R	75	2015-11-22	0.98	2.4892	75
33369	S84	84	2015-11-22	1.87	4.7498	84
35853	S97_R	97	2015-11-22	0.29	0.7366	97
38337	S84_R	84	2015-11-22	1	2.54	84
40773	S97_R	97	2015-11-22	0.32	0.8128	97
43209	S153_R	153	2015-11-22	0.72	1.8288	153
45694	S153_R	153	2015-11-22	0.76	1.9304	153
48178	S153_R	153	2015-11-22	0.76	1.9304	153
50614	S153	153	2015-11-22	0.76	1.9304	153
53050	S46	46	2015-11-22	0.37	0.9398	46
55486	S49	49	2015-11-22	0.28	0.7112	49
2153	S153	153	2015-11-23	0	0	153
4589	S46	46	2015-11-23	0	0	46
7025	S49	49	2015-11-23	0	0	49
8853	S386B_R	386	2015-11-23	0	0	386
11289	S154_R	154	2015-11-23	0	0	154
13705	S386B_R	386	2015-11-23	0	0	386
16189	S70_R	70	2015-11-23	0.33	0.8382	70
18673	S70_R	70	2015-11-23	0	0	70
21046	S70_R	70	2015-11-23	NA	0	70
23530	S80_R	80	2015-11-23	0.01	0.0254	80
26014	S75_R	75	2015-11-23	0	0	75
28498	S72_R	72	2015-11-23	0	0	72
30934	S75_R	75	2015-11-23	0	0	75
33370	S84	84	2015-11-23	0.65	1.651	84
35854	S97_R	97	2015-11-23	0.19	0.4826	97
38338	S84_R	84	2015-11-23	0	0	84
40774	S97_R	97	2015-11-23	0	0	97
43210	S153_R	153	2015-11-23	0.08	0.2032	153
45695	S153_R	153	2015-11-23	0	0	153
48179	S153_R	153	2015-11-23	0	0	153
50615	S153	153	2015-11-23	0	0	153
53051	S46	46	2015-11-23	0	0	46
55487	S49	49	2015-11-23	0	0	49
2154	S153	153	2015-11-24	0.01	0.025	153
4590	S46	46	2015-11-24	0	0	46
7026	S49	49	2015-11-24	0.02	0.051	49
8854	S386B_R	386	2015-11-24	0	0	386
11290	S154_R	154	2015-11-24	0	0	154
13706	S386B_R	386	2015-11-24	0	0	386
16190	S70_R	70	2015-11-24	0	0	70
18674	S70_R	70	2015-11-24	0	0	70
21047	S70_R	70	2015-11-24	NA	0	70
23531	S80_R	80	2015-11-24	0	0	80
26015	S75_R	75	2015-11-24	0	0	75
28499	S72_R	72	2015-11-24	0	0	72
30935	S75_R	75	2015-11-24	0	0	75
33371	S84	84	2015-11-24	0	0	84
35855	S97_R	97	2015-11-24	0	0	97
38339	S84_R	84	2015-11-24	0	0	84
40775	S97_R	97	2015-11-24	0	0	97
43211	S153_R	153	2015-11-24	0	0	153
45696	S153_R	153	2015-11-24	0.01	0.0254	153
48180	S153_R	153	2015-11-24	0.01	0.0254	153
50616	S153	153	2015-11-24	0.01	0.0254	153
53052	S46	46	2015-11-24	0	0	46
55488	S49	49	2015-11-24	0.02	0.0508	49
2155	S153	153	2015-11-25	0.01	0.025	153
4591	S46	46	2015-11-25	0.02	0.051	46
7027	S49	49	2015-11-25	0.15	0.381	49
8855	S386B_R	386	2015-11-25	0.05	0.127	386
11291	S154_R	154	2015-11-25	0.01	0.0254	154
13707	S386B_R	386	2015-11-25	0.05	0.127	386
16191	S70_R	70	2015-11-25	0	0	70
18675	S70_R	70	2015-11-25	0	0	70
21048	S70_R	70	2015-11-25	NA	0	70
23532	S80_R	80	2015-11-25	0.55	1.397	80
26016	S75_R	75	2015-11-25	0	0	75
28500	S72_R	72	2015-11-25	0	0	72
30936	S75_R	75	2015-11-25	0	0	75
33372	S84	84	2015-11-25	0.01	0.0254	84
35856	S97_R	97	2015-11-25	0	0	97
38340	S84_R	84	2015-11-25	0.02	0.0508	84
40776	S97_R	97	2015-11-25	0	0	97
43212	S153_R	153	2015-11-25	0	0	153
45697	S153_R	153	2015-11-25	0.01	0.0254	153
48181	S153_R	153	2015-11-25	0.01	0.0254	153
50617	S153	153	2015-11-25	0.01	0.0254	153
53053	S46	46	2015-11-25	0.02	0.0508	46
55489	S49	49	2015-11-25	0.15	0.381	49
2156	S153	153	2015-11-26	0.01	0.025	153
4592	S46	46	2015-11-26	0.15	0.381	46
7028	S49	49	2015-11-26	0.06	0.152	49
8856	S386B_R	386	2015-11-26	0.06	0.1524	386
11292	S154_R	154	2015-11-26	0.04	0.1016	154
13708	S386B_R	386	2015-11-26	0.06	0.1524	386
16192	S70_R	70	2015-11-26	0.02	0.0508	70
18676	S70_R	70	2015-11-26	0	0	70
21049	S70_R	70	2015-11-26	0	0	70
23533	S80_R	80	2015-11-26	0.18	0.4572	80
26017	S75_R	75	2015-11-26	0	0	75
28501	S72_R	72	2015-11-26	0.02	0.0508	72
30937	S75_R	75	2015-11-26	0	0	75
33373	S84	84	2015-11-26	0.01	0.0254	84
35857	S97_R	97	2015-11-26	0	0	97
38341	S84_R	84	2015-11-26	0.04	0.1016	84
40777	S97_R	97	2015-11-26	0.08	0.2032	97
43213	S153_R	153	2015-11-26	0.02	0.0508	153
45698	S153_R	153	2015-11-26	0.01	0.0254	153
48182	S153_R	153	2015-11-26	0.01	0.0254	153
50618	S153	153	2015-11-26	0.01	0.0254	153
[truncated: 94 more rows]

## Sheet: Sheet8
Sum of ata_value_cm	Column Labels
Row Labels	46	49	70	72	75	80	84	97	153	154	386	Grand Total		Row Labels	46	49	70	72	75	80	84	97	153	154	386	Grand Total	Average	Sdev
2015-07-01	0	0.0504	3.2512	0	0	0	2.7432	1.3716	0.9146	0	0.3048	8.6358		2015-07-01	0	0.0504	3.2512	0	0	0	2.7432	1.3716	0.9146	0	0.3048	8.6358	0.785073	1.18865
2015-07-02	0	0	0	0	0	0.0254	0	0	0.0254	0	0	0.0508		2015-07-02	0	0	0	0	0	0.0254	0	0	0.0254	0	0	0.0508	0.00461818	0.0102748
2015-07-03	0	0	0	0	0.0508	1.2192	0.4318	0.0762	0	0.6604	0.1524	2.5908		2015-07-03	0	0	0	0	0.0508	1.2192	0.4318	0.0762	0	0.6604	0.1524	2.5908	0.235527	0.391208
2015-07-04	1.016	0	0	0	0	0	0.4318	0.0762	16.764	0	1.1176	19.4056		2015-07-04	1.016	0	0	0	0	0	0.4318	0.0762	16.764	0	1.1176	19.4056	1.76415	4.9927
2015-07-05	0.1018	1.524	3.8608	1.4986	4.1656	0.254	2.3622	0.3556	4.3944	1.6256	3.7084	23.851		2015-07-05	0.1018	1.524	3.8608	1.4986	4.1656	0.254	2.3622	0.3556	4.3944	1.6256	3.7084	23.851	2.16827	1.63088
2015-07-06	1.2196	1.27	2.3876	0.0254	0.0508	0	2.413	0.762	0.4576	0.0254	0.0508	8.6622		2015-07-06	1.2196	1.27	2.3876	0.0254	0.0508	0	2.413	0.762	0.4576	0.0254	0.0508	8.6622	0.787473	0.927296
2015-07-07	0.3558	0.1018	1.6256	0	0.3048	2.0574	0	0.0254	12.3948	0	7.0612	23.9268		2015-07-07	0.3558	0.1018	1.6256	0	0.3048	2.0574	0	0.0254	12.3948	0	7.0612	23.9268	2.17516	3.98187
2015-07-08	0	0	0.8128	0	0.0508	0.0254	0	0	3.0734	0	0.0508	4.0132		2015-07-08	0	0	0.8128	0	0.0508	0.0254	0	0	3.0734	0	0.0508	4.0132	0.364836	0.92995
2015-07-09	0.2036	0	1.27	0	0.1016	0	0	0	0	0	0	1.5752		2015-07-09	0.2036	0	1.27	0	0.1016	0	0	0	0	0	0	1.5752	0.1432	0.379356
2015-07-10	0	0	0.635	0	0.0508	0	0	0	0	0	0	0.6858		2015-07-10	0	0	0.635	0	0.0508	0	0	0	0	0	0	0.6858	0.0623455	0.190538
2015-07-11	0	0	0	0	0	0	0	0	0	0	0	0		2015-07-11	0	0	0	0	0	0	0	0	0	0	0	0	0	0
2015-07-12	0	0	0	0	0	0	0	0	0	0	0	0		2015-07-12	0	0	0	0	0	0	0	0	0	0	0	0	0	0
2015-07-13	0	0	0.3048	0	3.4544	0	0	0	0	0	0	3.7592		2015-07-13	0	0	0.3048	0	3.4544	0	0	0	0	0	0	3.7592	0.341745	1.03639
2015-07-14	0	0	0.2032	0	0.1524	0.4572	0.0762	0	0	0	0	0.889		2015-07-14	0	0	0.2032	0	0.1524	0.4572	0.0762	0	0	0	0	0.889	0.0808182	0.144051
2015-07-15	3.9622	0.3044	1.3462	0.762	2.1844	0.7874	0.4826	0	1.8286	0.1778	0.3556	12.1912		2015-07-15	3.9622	0.3044	1.3462	0.762	2.1844	0.7874	0.4826	0	1.8286	0.1778	0.3556	12.1912	1.10829	1.17471
2015-07-16	0.6098	4.7756	3.6068	0.5842	2.5908	1.9558	0.4572	2.4638	0.6606	0	0.1016	17.8062		2015-07-16	0.6098	4.7756	3.6068	0.5842	2.5908	1.9558	0.4572	2.4638	0.6606	0	0.1016	17.8062	1.61875	1.58013
2015-07-17	8.5856	0.508	1.4732	0.0254	0.0508	0	0.0762	0.0508	0.0508	2.1082	0.3048	13.2338		2015-07-17	8.5856	0.508	1.4732	0.0254	0.0508	0	0.0762	0.0508	0.0508	2.1082	0.3048	13.2338	1.20307	2.54502
2015-07-18	0.0504	2.7436	0.0762	0.1524	0	1.016	0.0254	6.5024	0	0	0	10.5664		2015-07-18	0.0504	2.7436	0.0762	0.1524	0	1.016	0.0254	6.5024	0	0	0	10.5664	0.960582	2.018
2015-07-19	0	0	0.1524	1.1938	0.4064	0	0.4572	6.8326	0	2.1082	0	11.1506		2015-07-19	0	0	0.1524	1.1938	0.4064	0	0.4572	6.8326	0	2.1082	0	11.1506	1.01369	2.04079
2015-07-20	1.0664	9.7024	0.381	0	0	0.1524	0.9144	0.762	0	0	0	12.9786		2015-07-20	1.0664	9.7024	0.381	0	0	0.1524	0.9144	0.762	0	0	0	12.9786	1.17987	2.85562
2015-07-21	0	0.0504	0.1524	0	0	0.2286	0.4572	0.4318	7.62	0.1524	1.8796	10.9724		2015-07-21	0	0.0504	0.1524	0	0	0.2286	0.4572	0.4318	7.62	0.1524	1.8796	10.9724	0.997491	2.26162
2015-07-22	1.5744	3.2516	0	0	1.8288	0	0	2.3114	4.3438	0	1.0668	14.3768		2015-07-22	1.5744	3.2516	0	0	1.8288	0	0	2.3114	4.3438	0	1.0668	14.3768	1.30698	1.5151
2015-07-23	2.794	2.3878	0.1016	0.0508	2.7432	3.2766	0.2286	5.588	1.0164	0.7366	0.0508	18.9744		2015-07-23	2.794	2.3878	0.1016	0.0508	2.7432	3.2766	0.2286	5.588	1.0164	0.7366	0.0508	18.9744	1.72495	1.7863
2015-07-24	1.0664	1.27	2.1336	1.7018	1.524	0.3556	0.9652	3.8862	7.7216	1.8288	6.1468	28.6		2015-07-24	1.0664	1.27	2.1336	1.7018	1.524	0.3556	0.9652	3.8862	7.7216	1.8288	6.1468	28.6	2.6	2.34675
2015-07-25	5.7916	1.6258	1.0414	2.0574	0	0.127	0.7366	0.9652	4.5462	0.0254	5.4356	22.3522		2015-07-25	5.7916	1.6258	1.0414	2.0574	0	0.127	0.7366	0.9652	4.5462	0.0254	5.4356	22.3522	2.03202	2.18604
2015-07-26	1.016	0.2036	0.1016	0.1524	0.1016	0.5588	0.0508	0.5588	1.981	0.0508	0.4572	5.2326		2015-07-26	1.016	0.2036	0.1016	0.1524	0.1016	0.5588	0.0508	0.5588	1.981	0.0508	0.4572	5.2326	0.475691	0.58237
2015-07-27	0.7116	0	0.3556	0.0762	1.524	0	0.2794	0.2032	0.3302	1.4478	0.4572	5.3852		2015-07-27	0.7116	0	0.3556	0.0762	1.524	0	0.2794	0.2032	0.3302	1.4478	0.4572	5.3852	0.489564	0.534636
2015-07-28	0	0	0.2286	0	0	0	0.2286	0	0	0	0	0.4572		2015-07-28	0	0	0.2286	0	0	0	0.2286	0	0	0	0	0.4572	0.0415636	0.0924733
2015-07-29	0	1.4222	1.7272	2.5908	1.4224	0.4826	0.4318	2.0574	2.032	1.3462	2.7432	16.2558		2015-07-29	0	1.4222	1.7272	2.5908	1.4224	0.4826	0.4318	2.0574	2.032	1.3462	2.7432	16.2558	1.4778	0.885279
2015-07-30	0.4576	1.7276	3.9878	0.5588	0.3556	1.9558	1.2192	2.0066	0.508	0.2286	0.6604	13.666		2015-07-30	0.4576	1.7276	3.9878	0.5588	0.3556	1.9558	1.2192	2.0066	0.508	0.2286	0.6604	13.666	1.24236	1.12435
2015-07-31	3.9118	3.9622	1.8034	0.0254	0.1524	1.9558	1.3208	3.2258	25.5012	0	0	41.8588		2015-07-31	3.9118	3.9622	1.8034	0.0254	0.1524	1.9558	1.3208	3.2258	25.5012	0	0	41.8588	3.80535	7.35715
2015-08-01	0.4062	10.7698	1.5748	2.0828	3.9624	1.524	0.9398	4.953	9.1438	0.8128	3.556	39.7254		2015-08-01	0.4062	10.7698	1.5748	2.0828	3.9624	1.524	0.9398	4.953	9.1438	0.8128	3.556	39.7254	3.6114	3.46209
2015-08-02	0.1522	0.0504	1.5494	1.27	0.0508	2.286	3.5814	1.4224	0.965	0.7874	1.016	13.131		2015-08-02	0.1522	0.0504	1.5494	1.27	0.0508	2.286	3.5814	1.4224	0.965	0.7874	1.016	13.131	1.19373	1.05004
2015-08-03	0.5584	0	0.4064	0.0254	0	0.0762	3.175	0	0.2032	0.0254	0	4.47		2015-08-03	0.5584	0	0.4064	0.0254	0	0.0762	3.175	0	0.2032	0.0254	0	4.47	0.406364	0.937525
2015-08-04	0.0504	0	0	0	0	0	0	0	0	0	0	0.0504		2015-08-04	0.0504	0	0	0	0	0	0	0	0	0	0	0.0504	0.00458182	0.0151962
2015-08-05	0.4062	2.286	0	0	0	0.889	0	1.3716	1.4228	0	0	6.3756		2015-08-05	0.4062	2.286	0	0	0	0.889	0	1.3716	1.4228	0	0	6.3756	0.5796	0.799466
2015-08-06	0	0.0504	0	0	0	0	0	1.3716	0.3556	0	0	1.7776		2015-08-06	0	0.0504	0	0	0	0	0	1.3716	0.3556	0	0	1.7776	0.1616	0.415093
2015-08-07	0	0	0	0	0	0	0	0	0	0	0	0		2015-08-07	0	0	0	0	0	0	0	0	0	0	0	0	0	0
2015-08-08	0	0.0504	0.3048	0.2032	0.8636	0	0.1524	0	0.2034	0.1524	0.8128	2.743		2015-08-08	0	0.0504	0.3048	0.2032	0.8636	0	0.1524	0	0.2034	0.1524	0.8128	2.743	0.249364	0.307734
2015-08-09	0	0	0.1524	0.4064	0	0	0.1524	0	0.0508	0.0254	0	0.7874		2015-08-09	0	0	0.1524	0.4064	0	0	0.1524	0	0.0508	0.0254	0	0.7874	0.0715818	0.125887
2015-08-10	1.7276	0	0.0762	0.1016	0	0.1524	0.8128	1.9812	0	1.3716	0	6.2234		2015-08-10	1.7276	0	0.0762	0.1016	0	0.1524	0.8128	1.9812	0	1.3716	0	6.2234	0.565764	0.772662
2015-08-11	0	0	0	0	0	0.635	0.8382	2.1844	0	0.2032	0	3.8608		2015-08-11	0	0	0	0	0	0.635	0.8382	2.1844	0	0.2032	0	3.8608	0.350982	0.675546
2015-08-12	0	0	0.2032	0.2794	0	0	0.381	0.2032	0	1.4986	1.2192	3.7846		2015-08-12	0	0	0.2032	0.2794	0	0	0.381	0.2032	0	1.4986	1.2192	3.7846	0.344055	0.523063
2015-08-13	3.048	5.842	8.5852	0.8382	5.7912	0.4064	1.7018	1.2192	4.8766	2.7178	1.524	36.5504		2015-08-13	3.048	5.842	8.5852	0.8382	5.7912	0.4064	1.7018	1.2192	4.8766	2.7178	1.524	36.5504	3.32276	2.60682
2015-08-14	0	2.032	5.4102	0.4064	1.1684	0.1778	1.8542	1.2446	2.7432	0.3302	0	15.367		2015-08-14	0	2.032	5.4102	0.4064	1.1684	0.1778	1.8542	1.2446	2.7432	0.3302	0	15.367	1.397	1.61601
2015-08-15	2.0824	1.2196	3.7846	0.3302	3.4036	0.3302	2.5654	0.3048	12.8776	0.5334	0.0508	27.4826		2015-08-15	2.0824	1.2196	3.7846	0.3302	3.4036	0.3302	2.5654	0.3048	12.8776	0.5334	0.0508	27.4826	2.49842	3.68891
2015-08-16	1.8284	0.7116	1.6002	0.0254	0.0508	0	2.1082	0.3048	3.2254	0.0254	0.508	10.3882		2015-08-16	1.8284	0.7116	1.6002	0.0254	0.0508	0	2.1082	0.3048	3.2254	0.0254	0.508	10.3882	0.944382	1.08638
2015-08-17	0	2.0824	0	0	0	0	0	0.0254	0.0254	0	0.5588	2.692		2015-08-17	0	2.0824	0	0	0	0	0	0.0254	0.0254	0	0.5588	2.692	0.244727	0.631754
2015-08-18	0	3.048	0	0	0	0	0	3.1242	0.4068	0	0.2032	6.7822		2015-08-18	0	3.048	0	0	0	0	0	3.1242	0.4068	0	0.2032	6.7822	0.616564	1.22785
2015-08-19	0	0	0.0508	0.5842	1.0668	0	0	3.1496	0.4062	0.2286	0	5.4862		2015-08-19	0	0	0.0508	0.5842	1.0668	0	0	3.1496	0.4062	0.2286	0	5.4862	0.498745	0.942494
2015-08-20	0	0	0.1016	0.0254	0.0508	0	0	0.0254	0.0762	0	0	0.2794		2015-08-20	0	0	0.1016	0.0254	0.0508	0	0	0.0254	0.0762	0	0	0.2794	0.0254	0.035921
2015-08-21	0	0.4576	0	0.2794	0.2032	0.9144	0.0762	0	0	0.0254	0.1524	2.1086		2015-08-21	0	0.4576	0	0.2794	0.2032	0.9144	0.0762	0	0	0.0254	0.1524	2.1086	0.191691	0.281133
2015-08-22	0	0.0504	0	0	0.0508	0	0.0762	0	0	0.0254	0.2032	0.406		2015-08-22	0	0.0504	0	0	0.0508	0	0.0762	0	0	0.0254	0.2032	0.406	0.0369091	0.0615447
2015-08-23	0	0	0	0	0	0	0	0	10.16	0	0.0508	10.2108		2015-08-23	0	0	0	0	0	0	0	0	10.16	0	0.0508	10.2108	0.928255	3.06186
2015-08-24	0	0	0	1.0668	0	0	0.2286	0	2.54	1.4224	1.4224	6.6802		2015-08-24	0	0	0	1.0668	0	0	0.2286	0	2.54	1.4224	1.4224	6.6802	0.607291	0.873587
2015-08-25	0.1018	5.7402	0.762	0.0254	0	0.6858	0.2286	2.159	0.1012	0.0254	0.0508	9.8802		2015-08-25	0.1018	5.7402	0.762	0.0254	0	0.6858	0.2286	2.159	0.1012	0.0254	0.0508	9.8802	0.8982	1.72813
2015-08-26	1.0664	7.62	2.7178	0.0254	2.54	0.5842	0.127	2.8956	1.0414	0.0508	0	18.6686		2015-08-26	1.0664	7.62	2.7178	0.0254	2.54	0.5842	0.127	2.8956	1.0414	0.0508	0	18.6686	1.69715	2.26243
2015-08-27	7.9244	0.508	3.3782	1.4986	1.524	3.81	0.8636	0.9906	4.4192	0.2794	0.0508	25.2468		2015-08-27	7.9244	0.508	3.3782	1.4986	1.524	3.81	0.8636	0.9906	4.4192	0.2794	0.0508	25.2468	2.29516	2.38626
2015-08-28	5.588	0.5584	4.4704	0.6096	5.2832	0.0254	1.0668	0.508	4.0894	0.3302	9.0932	31.6226		2015-08-28	5.588	0.5584	4.4704	0.6096	5.2832	0.0254	1.0668	0.508	4.0894	0.3302	9.0932	31.6226	2.87478	2.99688
2015-08-29	0.4576	0.7116	2.5654	2.1082	1.6764	1.9304	1.7018	0.9652	1.092	0.4826	2.2352	15.9264		2015-08-29	0.4576	0.7116	2.5654	2.1082	1.6764	1.9304	1.7018	0.9652	1.092	0.4826	2.2352	15.9264	1.44785	0.739488
2015-08-30	10.9724	5.08	1.7526	0.3048	0.762	0.762	1.778	4.1656	5.004	5.6388	9.0932	45.3134		2015-08-30	10.9724	5.08	1.7526	0.3048	0.762	0.762	1.778	4.1656	5.004	5.6388	9.0932	45.3134	4.1194	3.51991
2015-08-31	0	1.3718	3.556	0	1.8288	0	0.4572	2.667	3.1492	0	0.1524	13.1824		2015-08-31	0	1.3718	3.556	0	1.8288	0	0.4572	2.667	3.1492	0	0.1524	13.1824	1.1984	1.39055
2015-09-01	0	0.1018	1.4478	0.0254	0.0508	0.0254	0	0.2794	1.8794	0	0.0508	3.8608		2015-09-01	0	0.1018	1.4478	0.0254	0.0508	0.0254	0	0.2794	1.8794	0	0.0508	3.8608	0.350982	0.660914
2015-09-02	0	0	0	0	0	0	0	0.0254	0.3048	0	0	0.3302		2015-09-02	0	0	0	0	0	0	0	0.0254	0.3048	0	0	0.3302	0.0300182	0.0914528
2015-09-03	0.8124	1.7276	1.1684	0	0	0.4064	0	0	0	0	0	4.1148		2015-09-03	0.8124	1.7276	1.1684	0	0	0.4064	0	0	0	0	0	4.1148	0.374073	0.602966
2015-09-04	1.8798	0.0504	2.032	0.1778	0.508	0.508	0.0762	1.5748	0	0.1016	0	6.9086		2015-09-04	1.8798	0.0504	2.032	0.1778	0.508	0.508	0.0762	1.5748	0	0.1016	0	6.9086	0.628055	0.798129
2015-09-05	8.8396	1.7276	2.6416	2.5146	7.6708	0.1524	2.2606	1.8796	8.5348	2.54	8.9408	47.7024		2015-09-05	8.8396	1.7276	2.6416	2.5146	7.6708	0.1524	2.2606	1.8796	8.5348	2.54	8.9408	47.7024	4.33658	3.38081
2015-09-06	0	0.3558	5.207	2.9464	3.8608	0	2.5146	2.0828	2.1336	1.2954	2.3368	22.7332		2015-09-06	0	0.3558	5.207	2.9464	3.8608	0	2.5146	2.0828	2.1336	1.2954	2.3368	22.7332	2.06665	1.61855
2015-09-07	3.4542	4.064	2.4384	0.1016	0.1524	0.3302	0.8382	1.3208	1.2194	0.2032	0.0508	14.1732		2015-09-07	3.4542	4.064	2.4384	0.1016	0.1524	0.3302	0.8382	1.3208	1.2194	0.2032	0.0508	14.1732	1.28847	1.4231
2015-09-08	0	0	0.1524	0.3302	0	0.0508	0.1016	1.3208	0.406	0.0254	0	2.3872		2015-09-08	0	0	0.1524	0.3302	0	0.0508	0.1016	1.3208	0.406	0.0254	0	2.3872	0.217018	0.392057
2015-09-09	0	0.762	0	0	0.1016	0	0	0.0254	0.0254	0	0	0.9144		2015-09-09	0	0.762	0	0	0.1016	0	0	0.0254	0.0254	0	0	0.9144	0.0831273	0.22721
2015-09-10	0	0	0	0	0.0508	0	0	0.0254	0	0	0.6604	0.7366		2015-09-10	0	0	0	0	0.0508	0	0	0.0254	0	0	0.6604	0.7366	0.0669636	0.197491
2015-09-11	0.1018	0.6098	0.8636	0.4826	0.9144	3.81	0.381	1.0414	19.6086	0.4826	3.3528	31.6486		2015-09-11	0.1018	0.6098	0.8636	0.4826	0.9144	3.81	0.381	1.0414	19.6086	0.4826	3.3528	31.6486	2.87715	5.68205
2015-09-12	0	0.0504	1.5748	1.016	0.1524	0.0254	0.4318	1.0414	5.0288	0.5588	0.4572	10.337		2015-09-12	0	0.0504	1.5748	1.016	0.1524	0.0254	0.4318	1.0414	5.0288	0.5588	0.4572	10.337	0.939727	1.44588
2015-09-13	2.1338	0.1018	1.651	0.5842	0.9652	0	0.9144	0	0	0.635	1.524	8.5094		2015-09-13	2.1338	0.1018	1.651	0.5842	0.9652	0	0.9144	0	0	0.635	1.524	8.5094	0.773582	0.744404
2015-09-14	0	0	8.9916	2.413	0.4064	0	1.27	0	6.2994	2.4892	8.5852	30.4548		2015-09-14	0	0	8.9916	2.413	0.4064	0	1.27	0	6.2994	2.4892	8.5852	30.4548	2.76862	3.51733
2015-09-15	4.572	0.8124	4.6228	0.9144	0.5588	0.7112	1.651	0.0508	2.5908	0.1778	2.3368	18.9988		2015-09-15	4.572	0.8124	4.6228	0.9144	0.5588	0.7112	1.651	0.0508	2.5908	0.1778	2.3368	18.9988	1.72716	1.63421
2015-09-16	14.7824	8.0776	0.4064	0.254	0	4.3942	1.6764	2.6924	1.6252	0.4826	2.4384	36.8296		2015-09-16	14.7824	8.0776	0.4064	0.254	0	4.3942	1.6764	2.6924	1.6252	0.4826	2.4384	36.8296	3.34815	4.45953
2015-09-17	10.0078	13.716	8.9154	1.7018	9.4996	6.0706	2.7178	16.1798	37.4906	4.2926	7.3152	117.907		2015-09-17	10.0078	13.716	8.9154	1.7018	9.4996	6.0706	2.7178	16.1798	37.4906	4.2926	7.3152	117.907	10.7188	9.90246
2015-09-18	0.3558	1.8284	4.064	0.0254	0	1.143	1.0414	10.3124	6.299	0	0.0508	25.1202		2015-09-18	0.3558	1.8284	4.064	0.0254	0	1.143	1.0414	10.3124	6.299	0	0.0508	25.1202	2.28365	3.33222
2015-09-19	0.4062	0.0504	0	0	0.0508	0	0.0254	0.762	2.489	0.0254	0.0508	3.86		2015-09-19	0.4062	0.0504	0	0	0.0508	0	0.0254	0.762	2.489	0.0254	0.0508	3.86	0.350909	0.748014
2015-09-20	0	0	0	0	0	0	0	0.0254	0.4826	0	0	0.508		2015-09-20	0	0	0	0	0	0	0	0.0254	0.4826	0	0	0.508	0.0461818	0.144944
2015-09-21	0	0.0504	0	0	0	0	0	0	0.1012	0	0	0.1516		2015-09-21	0	0.0504	0	0	0	0	0	0	0.1012	0	0	0.1516	0.0137818	0.032699
2015-09-22	0.3558	0	0	0.0254	0	0.0254	0	0	0.1012	0.0254	0.0508	0.584		2015-09-22	0.3558	0	0	0.0254	0	0.0254	0	0	0.1012	0.0254	0.0508	0.584	0.0530909	0.105046
2015-09-23	0.1018	0	0	0.635	0	0	0.0508	0	0.0254	0.0508	0.4572	1.321		2015-09-23	0.1018	0	0	0.635	0	0	0.0508	0	0.0254	0.0508	0.4572	1.321	0.120091	0.216746
2015-09-24	0.6602	0	0	0	0	0	0.1016	0.0508	0.2034	0.0254	0.0508	1.0922		2015-09-24	0.6602	0	0	0	0	0	0.1016	0.0508	0.2034	0.0254	0.0508	1.0922	0.0992909	0.196194
2015-09-25	1.0664	0.9656	13.8176	0.1524	0.9144	0	2.4892	0	0.0508	1.6256	0.254	21.336		2015-09-25	1.0664	0.9656	13.8176	0.1524	0.9144	0	2.4892	0	0.0508	1.6256	0.254	21.336	1.93964	4.01717
2015-09-26	0	0.1018	6.985	0	0	0	2.4892	0.0254	6.5282	0	0.4572	16.5868		2015-09-26	0	0.1018	6.985	0	0	0	2.4892	0.0254	6.5282	0	0.4572	16.5868	1.50789	2.69838
2015-09-27	0	0	0.0508	0	0	0	0	0.0762	2.1082	0	5.0292	7.2644		2015-09-27	0	0	0.0508	0	0	0	0	0.0762	2.1082	0	5.0292	7.2644	0.6604	1.5795
2015-09-28	2.3878	0	0.9398	0.0762	1.9304	0.0254	1.143	0.1778	0.127	0	0	6.8074		2015-09-28	2.3878	0	0.9398	0.0762	1.9304	0.0254	1.143	0.1778	0.127	0	0	6.8074	0.618855	0.863661
2015-09-29	0.0504	0.4576	3.4036	0.8128	2.1336	0.0762	1.9812	0.2286	0.8126	0.8128	1.8796	12.649		2015-09-29	0.0504	0.4576	3.4036	0.8128	2.1336	0.0762	1.9812	0.2286	0.8126	0.8128	1.8796	12.649	1.14991	1.06307
2015-09-30	0	0.1018	0.9398	0	0.0508	0	0.5334	0.127	0.2032	0.0254	0	1.9814		2015-09-30	0	0.1018	0.9398	0	0.0508	0	0.5334	0.127	0.2032	0.0254	0	1.9814	0.180127	0.296959
2015-10-01	0	0	0	0	0	0	0	0.0254	0	0	0	0.0254		2015-10-01	0	0	0	0	0	0	0	0.0254	0	0	0	0.0254	0.00230909	0.00765839
2015-10-02	0	0	0	0	0	0	0	0	0.8126	0.1524	0	0.965		2015-10-02	0	0	0	0	0	0	0	0	0.8126	0.1524	0	0.965	0.0877273	0.244722
2015-10-03	0	0	0	0	0	0	0	0.0508	0.2032	0	0	0.254		2015-10-03	0	0	0	0	0	0	0	0.0508	0.2032	0	0	0.254	0.0230909	0.0616488
2015-10-04	0.3558	1.778	2.1336	0.6096	1.0668	0.254	0.4826	0.6604	1.9308	0.5588	1.5748	11.4052		2015-10-04	0.3558	1.778	2.1336	0.6096	1.0668	0.254	0.4826	0.6604	1.9308	0.5588	1.5748	11.4052	1.03684	0.69125
2015-10-05	0.6098	0.0504	1.0668	0	0.0508	1.1684	0.0762	0.6858	0.8894	0.0254	0	4.623		2015-10-05	0.6098	0.0504	1.0668	0	0.0508	1.1684	0.0762	0.6858	0.8894	0.0254	0	4.623	0.420273	0.469583
2015-10-06	0.0504	0	0	0.0254	0.0508	0	0	0.0254	0.1016	0	0	0.2536		2015-10-06	0.0504	0	0	0.0254	0.0508	0	0	0.0254	0.1016	0	0	0.2536	0.0230545	0.0329955
2015-10-07	0	0	0	0	0	0.3048	0.0254	0	0	0	0	0.3302		2015-10-07	0	0	0	0	0	0.3048	0.0254	0	0	0	0	0.3302	0.0300182	0.0914528
2015-10-08	1.1682	0.1522	0	0	0	0.4064	0	0.0508	0	0	0	1.7776		2015-10-08	1.1682	0.1522	0	0	0	0.4064	0	0.0508	0	0	0	1.7776	0.1616	0.356137
2015-10-09	0.1018	0	1.8288	0.0254	0.0508	0	0	0.0508	0	0	1.6764	3.734		2015-10-09	0.1018	0	1.8288	0.0254	0.0508	0	0	0.0508	0	0	1.6764	3.734	0.339455	0.700248
2015-10-10	0	0.3044	2.794	1.0414	2.6924	0	1.524	0.254	1.016	1.8288	1.3208	12.7758		2015-10-10	0	0.3044	2.794	1.0414	2.6924	0	1.524	0.254	1.016	1.8288	1.3208	12.7758	1.16144	0.995124
2015-10-11	0	0.0504	2.7432	0.8128	0.4572	0	1.6256	0.3048	0.254	0.1778	0.3048	6.7306		2015-10-11	0	0.0504	2.7432	0.8128	0.4572	0	1.6256	0.3048	0.254	0.1778	0.3048	6.7306	0.611873	0.84874
2015-10-12	0	0	0.8636	0	0	0	0.1016	0	0	0	0	0.9652		2015-10-12	0	0	0.8636	0	0	0	0.1016	0	0	0	0	0.9652	0.0877455	0.259121
2015-10-13	0	0	0	0	0	0.2032	0	0.2794	0	0	0	0.4826		2015-10-13	0	0	0	0	0	0.2032	0	0.2794	0	0	0	0.4826	0.0438727	0.0990866
2015-10-14	0	0	0	0.0254	0	0	0	0.3302	0	0.0254	0	0.381		2015-10-14	0	0	0	0.0254	0	0	0	0.3302	0	0.0254	0	0.381	0.0346364	0.0985525
2015-10-15	0.0504	0	0	0	0	0	0	0	0	0	0	0.0504		2015-10-15	0.0504	0	0	0	0	0	0	0	0	0	0	0.0504	0.00458182	0.0151962
2015-10-16	0	0	0	0	0	0.0254	0	0	0	0	0	0.0254		2015-10-16	0	0	0	0	0	0.0254	0	0	0	0	0	0.0254	0.00230909	0.00765839
2015-10-17	0	0	0	0	0	2.4384	0	0	0	0	0	2.4384		2015-10-17	0	0	0	0	0	2.4384	0	0	0	0	0	2.4384	0.221673	0.735205
2015-10-18	0	0.0504	0	0	0.0508	0	0	0	0.4068	0	0	0.508		2015-10-18	0	0.0504	0	0	0.0508	0	0	0	0.4068	0	0	0.508	0.0461818	0.121304
2015-10-19	0	0	0	0	0	0	0	0	0.1016	0	0	0.1016		2015-10-19	0	0	0	0	0	0	0	0	0.1016	0	0	0.1016	0.00923636	0.0306336
2015-10-20	0	0	0	0	0	0.0254	0	0	0	0	0	0.0254		2015-10-20	0	0	0	0	0	0.0254	0	0	0	0	0	0.0254	0.00230909	0.00765839
2015-10-21	1.1682	0.0504	0.1524	0	0.2032	0.1016	0	0.1016	0.1012	0.127	0	2.0056		2015-10-21	1.1682	0.0504	0.1524	0	0.2032	0.1016	0	0.1016	0.1012	0.127	0	2.0056	0.182327	0.33363
2015-10-22	0.6098	1.778	0	0	0	0.7112	0.0508	0.8382	0.33	0.0254	0	4.3434		2015-10-22	0.6098	1.778	0	0	0	0.7112	0.0508	0.8382	0.33	0.0254	0	4.3434	0.394855	0.560236
2015-10-23	0	0.8124	0.508	0.2794	0.254	0.1778	0.508	2.0574	0.3808	0.2286	0.4064	5.6128		2015-10-23	0	0.8124	0.508	0.2794	0.254	0.1778	0.508	2.0574	0.3808	0.2286	0.4064	5.6128	0.510255	0.555129
2015-10-24	0	0	0.0254	0	0	0	0	0.1016	0.0762	0	0	0.2032		2015-10-24	0	0	0.0254	0	0	0	0	0.1016	0.0762	0	0	0.2032	0.0184727	0.0360839
2015-10-25	0	0	0	0	0	0	0	0.0508	0	0.0254	0	0.0762		2015-10-25	0	0	0	0	0	0	0	0.0508	0	0.0254	0	0.0762	0.00692727	0.0164254
2015-10-26	0	0	0	0	0	0	0	0.0254	0.1012	0	0.0508	0.1774		2015-10-26	0	0	0	0	0	0	0	0.0254	0.1012	0	0.0508	0.1774	0.0161273	0.0325673
2015-10-27	0.0504	0	0	0	0	0	0	0.0254	0.1266	0	0	0.2024		2015-10-27	0.0504	0	0	0	0	0	0	0.0254	0.1266	0	0	0.2024	0.0184	0.0393557
2015-10-28	0.0504	0.1018	3.8354	0.0762	4.0132	0	1.7018	0.8128	0.0254	0.2286	0	10.8456		2015-10-28	0.0504	0.1018	3.8354	0.0762	4.0132	0	1.7018	0.8128	0.0254	0.2286	0	10.8456	0.985964	1.54114
2015-10-29	0	0.1018	0.0508	0	0.0508	0	0.0254	0.8382	0	0	0	1.067		2015-10-29	0	0.1018	0.0508	0	0.0508	0	0.0254	0.8382	0	0	0	1.067	0.097	0.248042
2015-10-30	0	0	0	0	0	0	0	0.0254	0	0	0	0.0254		2015-10-30	0	0	0	0	0	0	0	0.0254	0	0	0	0.0254	0.00230909	0.00765839
2015-10-31	0	0	0	0	0	0	0	0	0	0	0	0		2015-10-31	0	0	0	0	0	0	0	0	0	0	0	0	0	0
2015-11-01	0	0	0	0	0	0	0	0	0	0	0	0		2015-11-01	0	0	0	0	0	0	0	0	0	0	0	0	0	0
2015-11-02	0	0	0.0762	0	0	0	0	0	0	0	0	0.0762		2015-11-02	0	0	0.0762	0	0	0	0	0	0	0	0	0.0762	0.00692727	0.0229752
2015-11-03	0	0	0	0	0	0	0	0	0	0	0	0		2015-11-03	0	0	0	0	0	0	0	0	0	0	0	0	0	0
2015-11-04	0	0.1522	0	0	0	0	0.0254	0.6858	0	0	0	0.8634		2015-11-04	0	0.1522	0	0	0	0	0.0254	0.6858	0	0	0	0.8634	0.0784909	0.206485
2015-11-05	0	0	0	0	0	0	0.0254	0.6858	0	0	0	0.7112		2015-11-05	0	0	0	0	0	0	0.0254	0.6858	0	0	0	0.7112	0.0646545	0.206152
2015-11-06	0	0	0	0	0.0508	0	0	0.0508	0.1012	0	0.0508	0.2536		2015-11-06	0	0	0	0	0.0508	0	0	0.0508	0.1012	0	0.0508	0.2536	0.0230545	0.0348378
2015-11-07	0.3558	0.1522	0	0	0	0	0	0	0.0254	0	0	0.5334		2015-11-07	0.3558	0.1522	0	0	0	0	0	0	0.0254	0	0	0.5334	0.0484909	0.111597
2015-11-08	0	0	0	0	0	0	0	0.0508	0	0	0	0.0508		2015-11-08	0	0	0	0	0	0	0	0.0508	0	0	0	0.0508	0.00461818	0.0153168
2015-11-09	0	0	2.1336	0.0254	0.4572	0	0.1016	0	0.1012	0.0508	0	2.8698		2015-11-09	0	0	2.1336	0.0254	0.4572	0	0.1016	0	0.1012	0.0508	0	2.8698	0.260891	0.635324
2015-11-10	0	0	7.4422	0.2286	0.9652	0	0.1524	0.2032	0.5334	0.3048	1.778	11.6078		2015-11-10	0	0	7.4422	0.2286	0.9652	0	0.1524	0.2032	0.5334	0.3048	1.778	11.6078	1.05525	2.18459
2015-11-11	0.1018	0	3.1496	0	0	0	0.0508	0	0.127	0.0254	0.0508	3.5054		2015-11-11	0.1018	0	3.1496	0	0	0	0.0508	0	0.127	0.0254	0.0508	3.5054	0.318673	0.939958
2015-11-12	0	0	0	0	0	0	0	0	0	0	0	0		2015-11-12	0	0	0	0	0	0	0	0	0	0	0	0	0	0
2015-11-13	3.81	1.1682	0.8128	0.7874	1.27	2.4384	0.5842	0.7874	0	0.0762	2.1844	13.919		2015-11-13	3.81	1.1682	0.8128	0.7874	1.27	2.4384	0.5842	0.7874	0	0.0762	2.1844	13.919	1.26536	1.13341
2015-11-14	0.1018	0	0.4064	0	0	0	0.5842	0.7874	0	0	0	1.8798		2015-11-14	0.1018	0	0.4064	0	0	0	0.5842	0.7874	0	0	0	1.8798	0.170891	0.285582
2015-11-15	0	0	0	0	0	0	0	0	0	0	0	0		2015-11-15	0	0	0	0	0	0	0	0	0	0	0	0	0	0
Grand Total	131.418	129.538	178.359	43.0784	95.1992	58.0898	73.9902	129.921	279.167	49.2506	119.786	1287.8

## Sheet: Sheet6
ID	station	station_clean	daily_date	data_value_in	ata_value_cm	station_clean_2
2008	S153	153	2015-07-01	0.02	0.051	153
4444	S46	46	2015-07-01	0	0	46
6880	S49	49	2015-07-01	0.01	0.025	49
8708	S386B_R	386	2015-07-01	0.06	0.1524	386
11144	S154_R	154	2015-07-01	0	0	154
13560	S386B_R	386	2015-07-01	0.06	0.1524	386
16044	S70_R	70	2015-07-01	1.28	3.2512	70
18528	S70_R	70	2015-07-01	0	0	70
20901	S70_R	70	2015-07-01	0	0	70
23385	S80_R	80	2015-07-01	0	0	80
25869	S75_R	75	2015-07-01	0	0	75
28353	S72_R	72	2015-07-01	0	0	72
30789	S75_R	75	2015-07-01	0	0	75
33225	S84	84	2015-07-01	1.08	2.7432	84
35709	S97_R	97	2015-07-01	0.53	1.3462	97
38193	S84_R	84	2015-07-01	0	0	84
40629	S97_R	97	2015-07-01	0.01	0.0254	97
43065	S153_R	153	2015-07-01	0.28	0.7112	153
45550	S153_R	153	2015-07-01	0.02	0.0508	153
48034	S153_R	153	2015-07-01	0.02	0.0508	153
50470	S153	153	2015-07-01	0.02	0.0508	153
52906	S46	46	2015-07-01	0	0	46
55342	S49	49	2015-07-01	0.01	0.0254	49
2009	S153	153	2015-07-02	0	0	153
4445	S46	46	2015-07-02	0	0	46
6881	S49	49	2015-07-02	0	0	49
8709	S386B_R	386	2015-07-02	0	0	386
11145	S154_R	154	2015-07-02	0	0	154
13561	S386B_R	386	2015-07-02	0	0	386
16045	S70_R	70	2015-07-02	0	0	70
18529	S70_R	70	2015-07-02	0	0	70
20902	S70_R	70	2015-07-02	0	0	70
23386	S80_R	80	2015-07-02	0.01	0.0254	80
25870	S75_R	75	2015-07-02	0	0	75
28354	S72_R	72	2015-07-02	0	0	72
30790	S75_R	75	2015-07-02	0	0	75
33226	S84	84	2015-07-02	0	0	84
35710	S97_R	97	2015-07-02	0	0	97
38194	S84_R	84	2015-07-02	0	0	84
40630	S97_R	97	2015-07-02	0	0	97
43066	S153_R	153	2015-07-02	0.01	0.0254	153
45551	S153_R	153	2015-07-02	0	0	153
48035	S153_R	153	2015-07-02	0	0	153
50471	S153	153	2015-07-02	0	0	153
52907	S46	46	2015-07-02	0	0	46
55343	S49	49	2015-07-02	0	0	49
2010	S153	153	2015-07-03	0	0	153
4446	S46	46	2015-07-03	0	0	46
6882	S49	49	2015-07-03	0	0	49
8710	S386B_R	386	2015-07-03	0.03	0.0762	386
11146	S154_R	154	2015-07-03	0.26	0.6604	154
13562	S386B_R	386	2015-07-03	0.03	0.0762	386
16046	S70_R	70	2015-07-03	0	0	70
18530	S70_R	70	2015-07-03	0	0	70
20903	S70_R	70	2015-07-03	0	0	70
23387	S80_R	80	2015-07-03	0.48	1.2192	80
25871	S75_R	75	2015-07-03	0.01	0.0254	75
28355	S72_R	72	2015-07-03	0	0	72
30791	S75_R	75	2015-07-03	0.01	0.0254	75
33227	S84	84	2015-07-03	0	0	84
35711	S97_R	97	2015-07-03	0	0	97
38195	S84_R	84	2015-07-03	0.17	0.4318	84
40631	S97_R	97	2015-07-03	0.03	0.0762	97
43067	S153_R	153	2015-07-03	0	0	153
45552	S153_R	153	2015-07-03	0	0	153
48036	S153_R	153	2015-07-03	0	0	153
50472	S153	153	2015-07-03	0	0	153
52908	S46	46	2015-07-03	0	0	46
55344	S49	49	2015-07-03	0	0	49
2011	S153	153	2015-07-04	1.65	4.191	153
4447	S46	46	2015-07-04	0.2	0.508	46
6883	S49	49	2015-07-04	0	0	49
8711	S386B_R	386	2015-07-04	0.22	0.5588	386
11147	S154_R	154	2015-07-04	0	0	154
13563	S386B_R	386	2015-07-04	0.22	0.5588	386
16047	S70_R	70	2015-07-04	0	0	70
18531	S70_R	70	2015-07-04	0	0	70
20904	S70_R	70	2015-07-04	0	0	70
23388	S80_R	80	2015-07-04	0	0	80
25872	S75_R	75	2015-07-04	0	0	75
28356	S72_R	72	2015-07-04	0	0	72
30792	S75_R	75	2015-07-04	0	0	75
33228	S84	84	2015-07-04	0.17	0.4318	84
35712	S97_R	97	2015-07-04	0.03	0.0762	97
38196	S84_R	84	2015-07-04	0	0	84
40632	S97_R	97	2015-07-04	0	0	97
43068	S153_R	153	2015-07-04	0	0	153
45553	S153_R	153	2015-07-04	1.65	4.191	153
48037	S153_R	153	2015-07-04	1.65	4.191	153
50473	S153	153	2015-07-04	1.65	4.191	153
52909	S46	46	2015-07-04	0.2	0.508	46
55345	S49	49	2015-07-04	0	0	49
2012	S153	153	2015-07-05	0.02	0.051	153
4448	S46	46	2015-07-05	0.02	0.051	46
6884	S49	49	2015-07-05	0.3	0.762	49
8712	S386B_R	386	2015-07-05	0.73	1.8542	386
11148	S154_R	154	2015-07-05	0.64	1.6256	154
13564	S386B_R	386	2015-07-05	0.73	1.8542	386
16048	S70_R	70	2015-07-05	0	0	70
18532	S70_R	70	2015-07-05	0.76	1.9304	70
20905	S70_R	70	2015-07-05	0.76	1.9304	70
23389	S80_R	80	2015-07-05	0.1	0.254	80
25873	S75_R	75	2015-07-05	0.82	2.0828	75
28357	S72_R	72	2015-07-05	0.59	1.4986	72
30793	S75_R	75	2015-07-05	0.82	2.0828	75
33229	S84	84	2015-07-05	0	0	84
35713	S97_R	97	2015-07-05	0	0	97
38197	S84_R	84	2015-07-05	0.93	2.3622	84
40633	S97_R	97	2015-07-05	0.14	0.3556	97
43069	S153_R	153	2015-07-05	1.65	4.191	153
45554	S153_R	153	2015-07-05	0.02	0.0508	153
48038	S153_R	153	2015-07-05	0.02	0.0508	153
50474	S153	153	2015-07-05	0.02	0.0508	153
52910	S46	46	2015-07-05	0.02	0.0508	46
55346	S49	49	2015-07-05	0.3	0.762	49
2013	S153	153	2015-07-06	0.04	0.102	153
4449	S46	46	2015-07-06	0.24	0.61	46
6885	S49	49	2015-07-06	0.25	0.635	49
8713	S386B_R	386	2015-07-06	0.01	0.0254	386
11149	S154_R	154	2015-07-06	0.01	0.0254	154
13565	S386B_R	386	2015-07-06	0.01	0.0254	386
16049	S70_R	70	2015-07-06	0.82	2.0828	70
18533	S70_R	70	2015-07-06	0.06	0.1524	70
20906	S70_R	70	2015-07-06	0.06	0.1524	70
23390	S80_R	80	2015-07-06	0	0	80
25874	S75_R	75	2015-07-06	0.01	0.0254	75
28358	S72_R	72	2015-07-06	0.01	0.0254	72
30794	S75_R	75	2015-07-06	0.01	0.0254	75
33230	S84	84	2015-07-06	0.94	2.3876	84
35714	S97_R	97	2015-07-06	0.14	0.3556	97
38198	S84_R	84	2015-07-06	0.01	0.0254	84
40634	S97_R	97	2015-07-06	0.16	0.4064	97
43070	S153_R	153	2015-07-06	0.02	0.0508	153
45555	S153_R	153	2015-07-06	0.04	0.1016	153
48039	S153_R	153	2015-07-06	0.04	0.1016	153
50475	S153	153	2015-07-06	0.04	0.1016	153
52911	S46	46	2015-07-06	0.24	0.6096	46
55347	S49	49	2015-07-06	0.25	0.635	49
2014	S153	153	2015-07-07	1.21	3.073	153
4450	S46	46	2015-07-07	0.07	0.178	46
6886	S49	49	2015-07-07	0.02	0.051	49
8714	S386B_R	386	2015-07-07	1.39	3.5306	386
11150	S154_R	154	2015-07-07	0	0	154
13566	S386B_R	386	2015-07-07	1.39	3.5306	386
16050	S70_R	70	2015-07-07	0	0	70
18534	S70_R	70	2015-07-07	0.32	0.8128	70
20907	S70_R	70	2015-07-07	0.32	0.8128	70
23391	S80_R	80	2015-07-07	0.81	2.0574	80
25875	S75_R	75	2015-07-07	0.06	0.1524	75
28359	S72_R	72	2015-07-07	0	0	72
30795	S75_R	75	2015-07-07	0.06	0.1524	75
33231	S84	84	2015-07-07	0	0	84
35715	S97_R	97	2015-07-07	0.01	0.0254	97
38199	S84_R	84	2015-07-07	0	0	84
40635	S97_R	97	2015-07-07	0	0	97
43071	S153_R	153	2015-07-07	0.04	0.1016	153
45556	S153_R	153	2015-07-07	1.21	3.0734	153
48040	S153_R	153	2015-07-07	1.21	3.0734	153
50476	S153	153	2015-07-07	1.21	3.0734	153
52912	S46	46	2015-07-07	0.07	0.1778	46
55348	S49	49	2015-07-07	0.02	0.0508	49
2015	S153	153	2015-07-08	0	0	153
4451	S46	46	2015-07-08	0	0	46
6887	S49	49	2015-07-08	0	0	49
8715	S386B_R	386	2015-07-08	0.01	0.0254	386
11151	S154_R	154	2015-07-08	0	0	154
13567	S386B_R	386	2015-07-08	0.01	0.0254	386
16051	S70_R	70	2015-07-08	0.32	0.8128	70
18535	S70_R	70	2015-07-08	0	0	70
20908	S70_R	70	2015-07-08	0	0	70
23392	S80_R	80	2015-07-08	0.01	0.0254	80
25876	S75_R	75	2015-07-08	0.01	0.0254	75
28360	S72_R	72	2015-07-08	0	0	72
30796	S75_R	75	2015-07-08	0.01	0.0254	75
33232	S84	84	2015-07-08	0	0	84
35716	S97_R	97	2015-07-08	0	0	97
38200	S84_R	84	2015-07-08	0	0	84
40636	S97_R	97	2015-07-08	0	0	97
43072	S153_R	153	2015-07-08	1.21	3.0734	153
45557	S153_R	153	2015-07-08	0	0	153
48041	S153_R	153	2015-07-08	0	0	153
50477	S153	153	2015-07-08	0	0	153
52913	S46	46	2015-07-08	0	0	46
55349	S49	49	2015-07-08	0	0	49
2016	S153	153	2015-07-09	0	0	153
4452	S46	46	2015-07-09	0.04	0.102	46
6888	S49	49	2015-07-09	0	0	49
8716	S386B_R	386	2015-07-09	0	0	386
11152	S154_R	154	2015-07-09	0	0	154
13568	S386B_R	386	2015-07-09	0	0	386
16052	S70_R	70	2015-07-09	0	0	70
18536	S70_R	70	2015-07-09	0.25	0.635	70
20909	S70_R	70	2015-07-09	0.25	0.635	70
23393	S80_R	80	2015-07-09	0	0	80
25877	S75_R	75	2015-07-09	0.02	0.0508	75
28361	S72_R	72	2015-07-09	0	0	72
30797	S75_R	75	2015-07-09	0.02	0.0508	75
33233	S84	84	2015-07-09	0	0	84
35717	S97_R	97	2015-07-09	0	0	97
38201	S84_R	84	2015-07-09	0	0	84
40637	S97_R	97	2015-07-09	0	0	97
43073	S153_R	153	2015-07-09	0	0	153
45558	S153_R	153	2015-07-09	0	0	153
48042	S153_R	153	2015-07-09	0	0	153
50478	S153	153	2015-07-09	0	0	153
52914	S46	46	2015-07-09	0.04	0.1016	46
55350	S49	49	2015-07-09	0	0	49
2017	S153	153	2015-07-10	0	0	153
4453	S46	46	2015-07-10	0	0	46
6889	S49	49	2015-07-10	0	0	49
8717	S386B_R	386	2015-07-10	0	0	386
11153	S154_R	154	2015-07-10	0	0	154
13569	S386B_R	386	2015-07-10	0	0	386
16053	S70_R	70	2015-07-10	0.25	0.635	70
18537	S70_R	70	2015-07-10	0	0	70
20910	S70_R	70	2015-07-10	0	0	70
23394	S80_R	80	2015-07-10	0	0	80
25878	S75_R	75	2015-07-10	0.01	0.0254	75
28362	S72_R	72	2015-07-10	0	0	72
30798	S75_R	75	2015-07-10	0.01	0.0254	75
33234	S84	84	2015-07-10	0	0	84
35718	S97_R	97	2015-07-10	0	0	97
38202	S84_R	84	2015-07-10	0	0	84
40638	S97_R	97	2015-07-10	0	0	97
43074	S153_R	153	2015-07-10	0	0	153
45559	S153_R	153	2015-07-10	0	0	153
48043	S153_R	153	2015-07-10	0	0	153
50479	S153	153	2015-07-10	0	0	153
52915	S46	46	2015-07-10	0	0	46
55351	S49	49	2015-07-10	0	0	49
2018	S153	153	2015-07-11	0	0	153
4454	S46	46	2015-07-11	0	0	46
6890	S49	49	2015-07-11	0	0	49
8718	S386B_R	386	2015-07-11	0	0	386
11154	S154_R	154	2015-07-11	0	0	154
13570	S386B_R	386	2015-07-11	0	0	386
16054	S70_R	70	2015-07-11	0	0	70
18538	S70_R	70	2015-07-11	0	0	70
20911	S70_R	70	2015-07-11	0	0	70
23395	S80_R	80	2015-07-11	0	0	80
25879	S75_R	75	2015-07-11	0	0	75
28363	S72_R	72	2015-07-11	0	0	72
30799	S75_R	75	2015-07-11	0	0	75
33235	S84	84	2015-07-11	0	0	84
35719	S97_R	97	2015-07-11	0	0	97
38203	S84_R	84	2015-07-11	0	0	84
40639	S97_R	97	2015-07-11	0	0	97
43075	S153_R	153	2015-07-11	0	0	153
45560	S153_R	153	2015-07-11	0	0	153
48044	S153_R	153	2015-07-11	0	0	153
50480	S153	153	2015-07-11	0	0	153
52916	S46	46	2015-07-11	0	0	46
55352	S49	49	2015-07-11	0	0	49
2019	S153	153	2015-07-12	0	0	153
4455	S46	46	2015-07-12	0	0	46
6891	S49	49	2015-07-12	0	0	49
8719	S386B_R	386	2015-07-12	0	0	386
11155	S154_R	154	2015-07-12	0	0	154
13571	S386B_R	386	2015-07-12	0	0	386
16055	S70_R	70	2015-07-12	0	0	70
18539	S70_R	70	2015-07-12	0	0	70
20912	S70_R	70	2015-07-12	0	0	70
23396	S80_R	80	2015-07-12	0	0	80
25880	S75_R	75	2015-07-12	0	0	75
28364	S72_R	72	2015-07-12	0	0	72
30800	S75_R	75	2015-07-12	0	0	75
33236	S84	84	2015-07-12	0	0	84
35720	S97_R	97	2015-07-12	0	0	97
38204	S84_R	84	2015-07-12	0	0	84
40640	S97_R	97	2015-07-12	0	0	97
43076	S153_R	153	2015-07-12	0	0	153
45561	S153_R	153	2015-07-12	0	0	153
48045	S153_R	153	2015-07-12	0	0	153
50481	S153	153	2015-07-12	0	0	153
52917	S46	46	2015-07-12	0	0	46
55353	S49	49	2015-07-12	0	0	49
2020	S153	153	2015-07-13	0	0	153
4456	S46	46	2015-07-13	0	0	46
6892	S49	49	2015-07-13	0	0	49
8720	S386B_R	386	2015-07-13	0	0	386
11156	S154_R	154	2015-07-13	0	0	154
13572	S386B_R	386	2015-07-13	0	0	386
16056	S70_R	70	2015-07-13	0	0	70
18540	S70_R	70	2015-07-13	0.06	0.1524	70
20913	S70_R	70	2015-07-13	0.06	0.1524	70
23397	S80_R	80	2015-07-13	0	0	80
25881	S75_R	75	2015-07-13	0.68	1.7272	75
28365	S72_R	72	2015-07-13	0	0	72
30801	S75_R	75	2015-07-13	0.68	1.7272	75
33237	S84	84	2015-07-13	0	0	84
35721	S97_R	97	2015-07-13	0	0	97
38205	S84_R	84	2015-07-13	0	0	84
40641	S97_R	97	2015-07-13	0	0	97
43077	S153_R	153	2015-07-13	0	0	153
45562	S153_R	153	2015-07-13	0	0	153
48046	S153_R	153	2015-07-13	0	0	153
50482	S153	153	2015-07-13	0	0	153
52918	S46	46	2015-07-13	0	0	46
55354	S49	49	2015-07-13	0	0	49
2021	S153	153	2015-07-14	0	0	153
4457	S46	46	2015-07-14	0	0	46
6893	S49	49	2015-07-14	0	0	49
8721	S386B_R	386	2015-07-14	0	0	386
11157	S154_R	154	2015-07-14	0	0	154
13573	S386B_R	386	2015-07-14	0	0	386
16057	S70_R	70	2015-07-14	0.06	0.1524	70
18541	S70_R	70	2015-07-14	0.01	0.0254	70
20914	S70_R	70	2015-07-14	0.01	0.0254	70
23398	S80_R	80	2015-07-14	0.18	0.4572	80
25882	S75_R	75	2015-07-14	0.03	0.0762	75
28366	S72_R	72	2015-07-14	0	0	72
30802	S75_R	75	2015-07-14	0.03	0.0762	75
33238	S84	84	2015-07-14	0	0	84
35722	S97_R	97	2015-07-14	0	0	97
38206	S84_R	84	2015-07-14	0.03	0.0762	84
40642	S97_R	97	2015-07-14	0	0	97
43078	S153_R	153	2015-07-14	0	0	153
45563	S153_R	153	2015-07-14	0	0	153
48047	S153_R	153	2015-07-14	0	0	153
50483	S153	153	2015-07-14	0	0	153
52919	S46	46	2015-07-14	0	0	46
55355	S49	49	2015-07-14	0	0	49
2022	S153	153	2015-07-15	0.18	0.457	153
4458	S46	46	2015-07-15	0.78	1.981	46
6894	S49	49	2015-07-15	0.06	0.152	49
8722	S386B_R	386	2015-07-15	0.07	0.1778	386
11158	S154_R	154	2015-07-15	0.07	0.1778	154
13574	S386B_R	386	2015-07-15	0.07	0.1778	386
16058	S70_R	70	2015-07-15	0.01	0.0254	70
18542	S70_R	70	2015-07-15	0.26	0.6604	70
20915	S70_R	70	2015-07-15	0.26	0.6604	70
23399	S80_R	80	2015-07-15	0.31	0.7874	80
25883	S75_R	75	2015-07-15	0.43	1.0922	75
28367	S72_R	72	2015-07-15	0.3	0.762	72
30803	S75_R	75	2015-07-15	0.43	1.0922	75
33239	S84	84	2015-07-15	0.03	0.0762	84
35723	S97_R	97	2015-07-15	0	0	97
38207	S84_R	84	2015-07-15	0.16	0.4064	84
40643	S97_R	97	2015-07-15	0	0	97
43079	S153_R	153	2015-07-15	0	0	153
45564	S153_R	153	2015-07-15	0.18	0.4572	153
48048	S153_R	153	2015-07-15	0.18	0.4572	153
50484	S153	153	2015-07-15	0.18	0.4572	153
52920	S46	46	2015-07-15	0.78	1.9812	46
55356	S49	49	2015-07-15	0.06	0.1524	49
2023	S153	153	2015-07-16	0.02	0.051	153
4459	S46	46	2015-07-16	0.12	0.305	46
6895	S49	49	2015-07-16	0.94	2.388	49
8723	S386B_R	386	2015-07-16	0.02	0.0508	386
11159	S154_R	154	2015-07-16	0	0	154
13575	S386B_R	386	2015-07-16	0.02	0.0508	386
16059	S70_R	70	2015-07-16	0.26	0.6604	70
18543	S70_R	70	2015-07-16	0.58	1.4732	70
20916	S70_R	70	2015-07-16	0.58	1.4732	70
23400	S80_R	80	2015-07-16	0.77	1.9558	80
25884	S75_R	75	2015-07-16	0.51	1.2954	75
28368	S72_R	72	2015-07-16	0.23	0.5842	72
30804	S75_R	75	2015-07-16	0.51	1.2954	75
33240	S84	84	2015-07-16	0.16	0.4064	84
35724	S97_R	97	2015-07-16	0	0	97
38208	S84_R	84	2015-07-16	0.02	0.0508	84
40644	S97_R	97	2015-07-16	0.97	2.4638	97
43080	S153_R	153	2015-07-16	0.18	0.4572	153
45565	S153_R	153	2015-07-16	0.02	0.0508	153
48049	S153_R	153	2015-07-16	0.02	0.0508	153
50485	S153	153	2015-07-16	0.02	0.0508	153
52921	S46	46	2015-07-16	0.12	0.3048	46
55357	S49	49	2015-07-16	0.94	2.3876	49
2024	S153	153	2015-07-17	0	0	153
4460	S46	46	2015-07-17	1.69	4.293	46
6896	S49	49	2015-07-17	0.1	0.254	49
8724	S386B_R	386	2015-07-17	0.06	0.1524	386
11160	S154_R	154	2015-07-17	0.83	2.1082	154
13576	S386B_R	386	2015-07-17	0.06	0.1524	386
16060	S70_R	70	2015-07-17	0.58	1.4732	70
18544	S70_R	70	2015-07-17	0	0	70
20917	S70_R	70	2015-07-17	0	0	70
23401	S80_R	80	2015-07-17	0	0	80
25885	S75_R	75	2015-07-17	0.01	0.0254	75
28369	S72_R	72	2015-07-17	0.01	0.0254	72
30805	S75_R	75	2015-07-17	0.01	0.0254	75
33241	S84	84	2015-07-17	0.02	0.0508	84
35725	S97_R	97	2015-07-17	0.02	0.0508	97
38209	S84_R	84	2015-07-17	0.01	0.0254	84
40645	S97_R	97	2015-07-17	0	0	97
43081	S153_R	153	2015-07-17	0.02	0.0508	153
45566	S153_R	153	2015-07-17	0	0	153
48050	S153_R	153	2015-07-17	0	0	153
50486	S153	153	2015-07-17	0	0	153
52922	S46	46	2015-07-17	1.69	4.2926	46
55358	S49	49	2015-07-17	0.1	0.254	49
2025	S153	153	2015-07-18	0	0	153
4461	S46	46	2015-07-18	0.01	0.025	46
6897	S49	49	2015-07-18	0.54	1.372	49
8725	S386B_R	386	2015-07-18	0	0	386
11161	S154_R	154	2015-07-18	0	0	154
13577	S386B_R	386	2015-07-18	0	0	386
16061	S70_R	70	2015-07-18	0.01	0.0254	70
18545	S70_R	70	2015-07-18	0.01	0.0254	70
20918	S70_R	70	2015-07-18	0.01	0.0254	70
23402	S80_R	80	2015-07-18	0.4	1.016	80
25886	S75_R	75	2015-07-18	0	0	75
28370	S72_R	72	2015-07-18	0.06	0.1524	72
30806	S75_R	75	2015-07-18	0	0	75
33242	S84	84	2015-07-18	0.01	0.0254	84
35726	S97_R	97	2015-07-18	0	0	97
38210	S84_R	84	2015-07-18	0	0	84
40646	S97_R	97	2015-07-18	2.56	6.5024	97
43082	S153_R	153	2015-07-18	0	0	153
45567	S153_R	153	2015-07-18	0	0	153
48051	S153_R	153	2015-07-18	0	0	153
50487	S153	153	2015-07-18	0	0	153
52923	S46	46	2015-07-18	0.01	0.0254	46
55359	S49	49	2015-07-18	0.54	1.3716	49
2026	S153	153	2015-07-19	0	0	153
4462	S46	46	2015-07-19	0	0	46
6898	S49	49	2015-07-19	0	0	49
8726	S386B_R	386	2015-07-19	0	0	386
11162	S154_R	154	2015-07-19	0.83	2.1082	154
13578	S386B_R	386	2015-07-19	0	0	386
16062	S70_R	70	2015-07-19	0	0	70
18546	S70_R	70	2015-07-19	0.03	0.0762	70
20919	S70_R	70	2015-07-19	0.03	0.0762	70
23403	S80_R	80	2015-07-19	0	0	80
25887	S75_R	75	2015-07-19	0.08	0.2032	75
28371	S72_R	72	2015-07-19	0.47	1.1938	72
30807	S75_R	75	2015-07-19	0.08	0.2032	75
33243	S84	84	2015-07-19	0	0	84
35727	S97_R	97	2015-07-19	2.56	6.5024	97
38211	S84_R	84	2015-07-19	0.18	0.4572	84
40647	S97_R	97	2015-07-19	0.13	0.3302	97
43083	S153_R	153	2015-07-19	0	0	153
45568	S153_R	153	2015-07-19	0	0	153
48052	S153_R	153	2015-07-19	0	0	153
50488	S153	153	2015-07-19	0	0	153
52924	S46	46	2015-07-19	0	0	46
55360	S49	49	2015-07-19	0	0	49
2027	S153	153	2015-07-20	0	0	153
4463	S46	46	2015-07-20	0.21	0.533	46
6899	S49	49	2015-07-20	1.91	4.851	49
8727	S386B_R	386	2015-07-20	0	0	386
11163	S154_R	154	2015-07-20	0	0	154
13579	S386B_R	386	2015-07-20	0	0	386
16063	S70_R	70	2015-07-20	0.03	0.0762	70
18547	S70_R	70	2015-07-20	0.06	0.1524	70
20920	S70_R	70	2015-07-20	0.06	0.1524	70
23404	S80_R	80	2015-07-20	0.06	0.1524	80
25888	S75_R	75	2015-07-20	0	0	75
28372	S72_R	72	2015-07-20	0	0	72
30808	S75_R	75	2015-07-20	0	0	75
33244	S84	84	2015-07-20	0.18	0.4572	84
35728	S97_R	97	2015-07-20	0.13	0.3302	97
38212	S84_R	84	2015-07-20	0.18	0.4572	84
40648	S97_R	97	2015-07-20	0.17	0.4318	97
43084	S153_R	153	2015-07-20	0	0	153
45569	S153_R	153	2015-07-20	0	0	153
48053	S153_R	153	2015-07-20	0	0	153
50489	S153	153	2015-07-20	0	0	153
52925	S46	46	2015-07-20	0.21	0.5334	46
55361	S49	49	2015-07-20	1.91	4.8514	49
2028	S153	153	2015-07-21	0.75	1.905	153
4464	S46	46	2015-07-21	0	0	46
6900	S49	49	2015-07-21	0.01	0.025	49
8728	S386B_R	386	2015-07-21	0.37	0.9398	386
11164	S154_R	154	2015-07-21	0.06	0.1524	154
13580	S386B_R	386	2015-07-21	0.37	0.9398	386
16064	S70_R	70	2015-07-21	0.06	0.1524	70
18548	S70_R	70	2015-07-21	0	0	70
20921	S70_R	70	2015-07-21	0	0	70
23405	S80_R	80	2015-07-21	0.09	0.2286	80
25889	S75_R	75	2015-07-21	0	0	75
28373	S72_R	72	2015-07-21	0	0	72
30809	S75_R	75	2015-07-21	0	0	75
33245	S84	84	2015-07-21	0.18	0.4572	84
35729	S97_R	97	2015-07-21	0.17	0.4318	97
38213	S84_R	84	2015-07-21	0	0	84
40649	S97_R	97	2015-07-21	0	0	97
43085	S153_R	153	2015-07-21	0	0	153
45570	S153_R	153	2015-07-21	0.75	1.905	153
48054	S153_R	153	2015-07-21	0.75	1.905	153
50490	S153	153	2015-07-21	0.75	1.905	153
52926	S46	46	2015-07-21	0	0	46
55362	S49	49	2015-07-21	0.01	0.0254	49
2029	S153	153	2015-07-22	0.24	0.61	153
4465	S46	46	2015-07-22	0.31	0.787	46
6901	S49	49	2015-07-22	0.64	1.626	49
8729	S386B_R	386	2015-07-22	0.21	0.5334	386
11165	S154_R	154	2015-07-22	0	0	154
13581	S386B_R	386	2015-07-22	0.21	0.5334	386
16065	S70_R	70	2015-07-22	0	0	70
18549	S70_R	70	2015-07-22	0	0	70
20922	S70_R	70	2015-07-22	0	0	70
23406	S80_R	80	2015-07-22	0	0	80
25890	S75_R	75	2015-07-22	0.36	0.9144	75
28374	S72_R	72	2015-07-22	0	0	72
30810	S75_R	75	2015-07-22	0.36	0.9144	75
33246	S84	84	2015-07-22	0	0	84
35730	S97_R	97	2015-07-22	0	0	97
38214	S84_R	84	2015-07-22	0	0	84
40650	S97_R	97	2015-07-22	0.91	2.3114	97
43086	S153_R	153	2015-07-22	0.75	1.905	153
45571	S153_R	153	2015-07-22	0.24	0.6096	153
48055	S153_R	153	2015-07-22	0.24	0.6096	153
50491	S153	153	2015-07-22	0.24	0.6096	153
52927	S46	46	2015-07-22	0.31	0.7874	46
55363	S49	49	2015-07-22	0.64	1.6256	49
2030	S153	153	2015-07-23	0.04	0.102	153
4466	S46	46	2015-07-23	0.55	1.397	46
6902	S49	49	2015-07-23	0.47	1.194	49
8730	S386B_R	386	2015-07-23	0.01	0.0254	386
11166	S154_R	154	2015-07-23	0.29	0.7366	154
13582	S386B_R	386	2015-07-23	0.01	0.0254	386
16066	S70_R	70	2015-07-23	0	0	70
18550	S70_R	70	2015-07-23	0.02	0.0508	70
20923	S70_R	70	2015-07-23	0.02	0.0508	70
23407	S80_R	80	2015-07-23	1.29	3.2766	80
25891	S75_R	75	2015-07-23	0.54	1.3716	75
28375	S72_R	72	2015-07-23	0.02	0.0508	72
30811	S75_R	75	2015-07-23	0.54	1.3716	75
33247	S84	84	2015-07-23	0	0	84
35731	S97_R	97	2015-07-23	0.91	2.3114	97
38215	S84_R	84	2015-07-23	0.09	0.2286	84
40651	S97_R	97	2015-07-23	1.29	3.2766	97
43087	S153_R	153	2015-07-23	0.24	0.6096	153
45572	S153_R	153	2015-07-23	0.04	0.1016	153
48056	S153_R	153	2015-07-23	0.04	0.1016	153
50492	S153	153	2015-07-23	0.04	0.1016	153
52928	S46	46	2015-07-23	0.55	1.397	46
55364	S49	49	2015-07-23	0.47	1.1938	49
2031	S153	153	2015-07-24	0.75	1.905	153
4467	S46	46	2015-07-24	0.21	0.533	46
6903	S49	49	2015-07-24	0.25	0.635	49
8731	S386B_R	386	2015-07-24	1.21	3.0734	386
11167	S154_R	154	2015-07-24	0.72	1.8288	154
13583	S386B_R	386	2015-07-24	1.21	3.0734	386
16067	S70_R	70	2015-07-24	0.02	0.0508	70
18551	S70_R	70	2015-07-24	0.41	1.0414	70
20924	S70_R	70	2015-07-24	0.41	1.0414	70
23408	S80_R	80	2015-07-24	0.14	0.3556	80
25892	S75_R	75	2015-07-24	0.3	0.762	75
28376	S72_R	72	2015-07-24	0.67	1.7018	72
30812	S75_R	75	2015-07-24	0.3	0.762	75
33248	S84	84	2015-07-24	0.09	0.2286	84
35732	S97_R	97	2015-07-24	1.29	3.2766	97
38216	S84_R	84	2015-07-24	0.29	0.7366	84
40652	S97_R	97	2015-07-24	0.24	0.6096	97
43088	S153_R	153	2015-07-24	0.04	0.1016	153
45573	S153_R	153	2015-07-24	0.75	1.905	153
48057	S153_R	153	2015-07-24	0.75	1.905	153
50493	S153	153	2015-07-24	0.75	1.905	153
52929	S46	46	2015-07-24	0.21	0.5334	46
55365	S49	49	2015-07-24	0.25	0.635	49
2032	S153	153	2015-07-25	0.26	0.66	153
4468	S46	46	2015-07-25	1.14	2.896	46
6904	S49	49	2015-07-25	0.32	0.813	49
8732	S386B_R	386	2015-07-25	1.07	2.7178	386
11168	S154_R	154	2015-07-25	0.01	0.0254	154
13584	S386B_R	386	2015-07-25	1.07	2.7178	386
16068	S70_R	70	2015-07-25	0.41	1.0414	70
18552	S70_R	70	2015-07-25	0	0	70
20925	S70_R	70	2015-07-25	0	0	70
23409	S80_R	80	2015-07-25	0.05	0.127	80
25893	S75_R	75	2015-07-25	0	0	75
28377	S72_R	72	2015-07-25	0.81	2.0574	72
30813	S75_R	75	2015-07-25	0	0	75
33249	S84	84	2015-07-25	0.29	0.7366	84
35733	S97_R	97	2015-07-25	0.24	0.6096	97
38217	S84_R	84	2015-07-25	0	0	84
40653	S97_R	97	2015-07-25	0.14	0.3556	97
43089	S153_R	153	2015-07-25	0.75	1.905	153
45574	S153_R	153	2015-07-25	0.26	0.6604	153
48058	S153_R	153	2015-07-25	0.26	0.6604	153
50494	S153	153	2015-07-25	0.26	0.6604	153
52930	S46	46	2015-07-25	1.14	2.8956	46
55366	S49	49	2015-07-25	0.32	0.8128	49
2033	S153	153	2015-07-26	0.13	0.33	153
4469	S46	46	2015-07-26	0.2	0.508	46
6905	S49	49	2015-07-26	0.04	0.102	49
8733	S386B_R	386	2015-07-26	0.09	0.2286	386
11169	S154_R	154	2015-07-26	0.02	0.0508	154
13585	S386B_R	386	2015-07-26	0.09	0.2286	386
16069	S70_R	70	2015-07-26	0	0	70
18553	S70_R	70	2015-07-26	0.02	0.0508	70
20926	S70_R	70	2015-07-26	0.02	0.0508	70
23410	S80_R	80	2015-07-26	0.22	0.5588	80
25894	S75_R	75	2015-07-26	0.02	0.0508	75
28378	S72_R	72	2015-07-26	0.06	0.1524	72
30814	S75_R	75	2015-07-26	0.02	0.0508	75
33250	S84	84	2015-07-26	0	0	84
35734	S97_R	97	2015-07-26	0.14	0.3556	97
38218	S84_R	84	2015-07-26	0.02	0.0508	84
40654	S97_R	97	2015-07-26	0.08	0.2032	97
43090	S153_R	153	2015-07-26	0.26	0.6604	153
45575	S153_R	153	2015-07-26	0.13	0.3302	153
48059	S153_R	153	2015-07-26	0.13	0.3302	153
50495	S153	153	2015-07-26	0.13	0.3302	153
52931	S46	46	2015-07-26	0.2	0.508	46
55367	S49	49	2015-07-26	0.04	0.1016	49
2034	S153	153	2015-07-27	0	0	153
4470	S46	46	2015-07-27	0.14	0.356	46
6906	S49	49	2015-07-27	0	0	49
8734	S386B_R	386	2015-07-27	0.09	0.2286	386
11170	S154_R	154	2015-07-27	0.57	1.4478	154
13586	S386B_R	386	2015-07-27	0.09	0.2286	386
16070	S70_R	70	2015-07-27	0.02	0.0508	70
18554	S70_R	70	2015-07-27	0.06	0.1524	70
20927	S70_R	70	2015-07-27	0.06	0.1524	70
23411	S80_R	80	2015-07-27	0	0	80
25895	S75_R	75	2015-07-27	0.3	0.762	75
28379	S72_R	72	2015-07-27	0.03	0.0762	72
30815	S75_R	75	2015-07-27	0.3	0.762	75
33251	S84	84	2015-07-27	0.02	0.0508	84
35735	S97_R	97	2015-07-27	0.08	0.2032	97
38219	S84_R	84	2015-07-27	0.09	0.2286	84
40655	S97_R	97	2015-07-27	0	0	97
43091	S153_R	153	2015-07-27	0.13	0.3302	153
45576	S153_R	153	2015-07-27	0	0	153
48060	S153_R	153	2015-07-27	0	0	153
50496	S153	153	2015-07-27	0	0	153
52932	S46	46	2015-07-27	0.14	0.3556	46
55368	S49	49	2015-07-27	0	0	49
2035	S153	153	2015-07-28	0	0	153
4471	S46	46	2015-07-28	0	0	46
6907	S49	49	2015-07-28	0	0	49
8735	S386B_R	386	2015-07-28	0	0	386
11171	S154_R	154	2015-07-28	0	0	154
13587	S386B_R	386	2015-07-28	0	0	386
16071	S70_R	70	2015-07-28	0.07	0.1778	70
18555	S70_R	70	2015-07-28	0.01	0.0254	70
20928	S70_R	70	2015-07-28	0.01	0.0254	70
23412	S80_R	80	2015-07-28	0	0	80
25896	S75_R	75	2015-07-28	0	0	75
28380	S72_R	72	2015-07-28	0	0	72
30816	S75_R	75	2015-07-28	0	0	75
33252	S84	84	2015-07-28	0.09	0.2286	84
35736	S97_R	97	2015-07-28	0	0	97
38220	S84_R	84	2015-07-28	0	0	84
40656	S97_R	97	2015-07-28	0	0	97
43092	S153_R	153	2015-07-28	0	0	153
45577	S153_R	153	2015-07-28	0	0	153
48061	S153_R	153	2015-07-28	0	0	153
50497	S153	153	2015-07-28	0	0	153
52933	S46	46	2015-07-28	0	0	46
55369	S49	49	2015-07-28	0	0	49
2036	S153	153	2015-07-29	0.2	0.508	153
4472	S46	46	2015-07-29	0	0	46
6908	S49	49	2015-07-29	0.28	0.711	49
8736	S386B_R	386	2015-07-29	0.54	1.3716	386
11172	S154_R	154	2015-07-29	0.53	1.3462	154
13588	S386B_R	386	2015-07-29	0.54	1.3716	386
16072	S70_R	70	2015-07-29	0	0	70
18556	S70_R	70	2015-07-29	0.34	0.8636	70
20929	S70_R	70	2015-07-29	0.34	0.8636	70
23413	S80_R	80	2015-07-29	0.19	0.4826	80
25897	S75_R	75	2015-07-29	0.28	0.7112	75
28381	S72_R	72	2015-07-29	1.02	2.5908	72
30817	S75_R	75	2015-07-29	0.28	0.7112	75
33253	S84	84	2015-07-29	0	0	84
35737	S97_R	97	2015-07-29	0.14	0.3556	97
38221	S84_R	84	2015-07-29	0.17	0.4318	84
40657	S97_R	97	2015-07-29	0.67	1.7018	97
43093	S153_R	153	2015-07-29	0	0	153
45578	S153_R	153	2015-07-29	0.2	0.508	153
48062	S153_R	153	2015-07-29	0.2	0.508	153
50498	S153	153	2015-07-29	0.2	0.508	153
52934	S46	46	2015-07-29	0	0	46
55370	S49	49	2015-07-29	0.28	0.7112	49
2037	S153	153	2015-07-30	0	0	153
4473	S46	46	2015-07-30	0.09	0.229	46
6909	S49	49	2015-07-30	0.34	0.864	49
8737	S386B_R	386	2015-07-30	0.13	0.3302	386
11173	S154_R	154	2015-07-30	0.09	0.2286	154
13589	S386B_R	386	2015-07-30	0.13	0.3302	386
16073	S70_R	70	2015-07-30	0.35	0.889	70
18557	S70_R	70	2015-07-30	0.61	1.5494	70
20930	S70_R	70	2015-07-30	0.61	1.5494	70
23414	S80_R	80	2015-07-30	0.77	1.9558	80
25898	S75_R	75	2015-07-30	0.07	0.1778	75
28382	S72_R	72	2015-07-30	0.22	0.5588	72
30818	S75_R	75	2015-07-30	0.07	0.1778	75
33254	S84	84	2015-07-30	0.17	0.4318	84
35738	S97_R	97	2015-07-30	0.53	1.3462	97
38222	S84_R	84	2015-07-30	0.31	0.7874	84
40658	S97_R	97	2015-07-30	0.26	0.6604	97
43094	S153_R	153	2015-07-30	0.2	0.508	153
45579	S153_R	153	2015-07-30	0	0	153
48063	S153_R	153	2015-07-30	0	0	153
50499	S153	153	2015-07-30	0	0	153
52935	S46	46	2015-07-30	0.09	0.2286	46
55371	S49	49	2015-07-30	0.34	0.8636	49
2038	S153	153	2015-07-31	2.51	6.375	153
4474	S46	46	2015-07-31	0.77	1.956	46
6910	S49	49	2015-07-31	0.78	1.981	49
8738	S386B_R	386	2015-07-31	0	0	386
11174	S154_R	154	2015-07-31	0	0	154
13590	S386B_R	386	2015-07-31	0	0	386
16074	S70_R	70	2015-07-31	0.61	1.5494	70
18558	S70_R	70	2015-07-31	0.05	0.127	70
20931	S70_R	70	2015-07-31	0.05	0.127	70
23415	S80_R	80	2015-07-31	0.77	1.9558	80
25899	S75_R	75	2015-07-31	0.03	0.0762	75
28383	S72_R	72	2015-07-31	0.01	0.0254	72
30819	S75_R	75	2015-07-31	0.03	0.0762	75
33255	S84	84	2015-07-31	0.31	0.7874	84
35739	S97_R	97	2015-07-31	0.26	0.6604	97
38223	S84_R	84	2015-07-31	0.21	0.5334	84
40659	S97_R	97	2015-07-31	1.01	2.5654	97
43095	S153_R	153	2015-07-31	0	0	153
45580	S153_R	153	2015-07-31	2.51	6.3754	153
48064	S153_R	153	2015-07-31	2.51	6.3754	153
50500	S153	153	2015-07-31	2.51	6.3754	153
52936	S46	46	2015-07-31	0.77	1.9558	46
55372	S49	49	2015-07-31	0.78	1.9812	49
2039	S153	153	2015-08-01	0.23	0.584	153
4475	S46	46	2015-08-01	0.08	0.203	46
6911	S49	49	2015-08-01	2.12	5.385	49
8739	S386B_R	386	2015-08-01	0.7	1.778	386
11175	S154_R	154	2015-08-01	0.32	0.8128	154
13591	S386B_R	386	2015-08-01	0.7	1.778	386
16075	S70_R	70	2015-08-01	0.04	0.1016	70
18559	S70_R	70	2015-08-01	0.29	0.7366	70
20932	S70_R	70	2015-08-01	0.29	0.7366	70
23416	S80_R	80	2015-08-01	0.6	1.524	80
25900	S75_R	75	2015-08-01	0.78	1.9812	75
28384	S72_R	72	2015-08-01	0.82	2.0828	72
30820	S75_R	75	2015-08-01	0.78	1.9812	75
33256	S84	84	2015-08-01	0.21	0.5334	84
35740	S97_R	97	2015-08-01	1.2	3.048	97
38224	S84_R	84	2015-08-01	0.16	0.4064	84
40660	S97_R	97	2015-08-01	0.75	1.905	97
43096	S153_R	153	2015-08-01	2.68	6.8072	153
45581	S153_R	153	2015-08-01	0.23	0.5842	153
48065	S153_R	153	2015-08-01	0.23	0.5842	153
50501	S153	153	2015-08-01	0.23	0.5842	153
52937	S46	46	2015-08-01	0.08	0.2032	46
55373	S49	49	2015-08-01	2.12	5.3848	49
2040	S153	153	2015-08-02	0.08	0.203	153
4476	S46	46	2015-08-02	0.03	0.076	46
6912	S49	49	2015-08-02	0.01	0.025	49
8740	S386B_R	386	2015-08-02	0.2	0.508	386
11176	S154_R	154	2015-08-02	0.31	0.7874	154
13592	S386B_R	386	2015-08-02	0.2	0.508	386
16076	S70_R	70	2015-08-02	0.29	0.7366	70
18560	S70_R	70	2015-08-02	0.16	0.4064	70
20933	S70_R	70	2015-08-02	0.16	0.4064	70
23417	S80_R	80	2015-08-02	0.9	2.286	80
25901	S75_R	75	2015-08-02	0.01	0.0254	75
28385	S72_R	72	2015-08-02	0.5	1.27	72
30821	S75_R	75	2015-08-02	0.01	0.0254	75
33257	S84	84	2015-08-02	0.16	0.4064	84
35741	S97_R	97	2015-08-02	0.56	1.4224	97
38225	S84_R	84	2015-08-02	1.25	3.175	84
40661	S97_R	97	2015-08-02	0	0	97
43097	S153_R	153	2015-08-02	0.06	0.1524	153
45582	S153_R	153	2015-08-02	0.08	0.2032	153
48066	S153_R	153	2015-08-02	0.08	0.2032	153
50502	S153	153	2015-08-02	0.08	0.2032	153
52938	S46	46	2015-08-02	0.03	0.0762	46
55374	S49	49	2015-08-02	0.01	0.0254	49
2041	S153	153	2015-08-03	0	0	153
4477	S46	46	2015-08-03	0.11	0.279	46
6913	S49	49	2015-08-03	0	0	49
8741	S386B_R	386	2015-08-03	0	0	386
11177	S154_R	154	2015-08-03	0.01	0.0254	154
13593	S386B_R	386	2015-08-03	0	0	386
16077	S70_R	70	2015-08-03	0.16	0.4064	70
18561	S70_R	70	2015-08-03	0	0	70
20934	S70_R	70	2015-08-03	0	0	70
23418	S80_R	80	2015-08-03	0.03	0.0762	80
25902	S75_R	75	2015-08-03	0	0	75
28386	S72_R	72	2015-08-03	0.01	0.0254	72
30822	S75_R	75	2015-08-03	0	0	75
33258	S84	84	2015-08-03	1.25	3.175	84
35742	S97_R	97	2015-08-03	0	0	97
38226	S84_R	84	2015-08-03	0	0	84
40662	S97_R	97	2015-08-03	0	0	97
43098	S153_R	153	2015-08-03	0.08	0.2032	153
45583	S153_R	153	2015-08-03	0	0	153
48067	S153_R	153	2015-08-03	0	0	153
50503	S153	153	2015-08-03	0	0	153
52939	S46	46	2015-08-03	0.11	0.2794	46
55375	S49	49	2015-08-03	0	0	49
2042	S153	153	2015-08-04	0	0	153
4478	S46	46	2015-08-04	0.01	0.025	46
6914	S49	49	2015-08-04	0	0	49
8742	S386B_R	386	2015-08-04	0	0	386
11178	S154_R	154	2015-08-04	0	0	154
13594	S386B_R	386	2015-08-04	0	0	386
16078	S70_R	70	2015-08-04	0	0	70
18562	S70_R	70	2015-08-04	0	0	70
20935	S70_R	70	2015-08-04	0	0	70
23419	S80_R	80	2015-08-04	0	0	80
25903	S75_R	75	2015-08-04	0	0	75
28387	S72_R	72	2015-08-04	0	0	72
30823	S75_R	75	2015-08-04	0	0	75
33259	S84	84	2015-08-04	0	0	84
35743	S97_R	97	2015-08-04	0	0	97
38227	S84_R	84	2015-08-04	0	0	84
40663	S97_R	97	2015-08-04	0	0	97
43099	S153_R	153	2015-08-04	0	0	153
45584	S153_R	153	2015-08-04	0	0	153
48068	S153_R	153	2015-08-04	0	0	153
50504	S153	153	2015-08-04	0	0	153
52940	S46	46	2015-08-04	0.01	0.0254	46
55376	S49	49	2015-08-04	0	0	49
2043	S153	153	2015-08-05	0.14	0.356	153
4479	S46	46	2015-08-05	0.08	0.203	46
6915	S49	49	2015-08-05	0.45	1.143	49
8743	S386B_R	386	2015-08-05	0	0	386
11179	S154_R	154	2015-08-05	0	0	154
13595	S386B_R	386	2015-08-05	0	0	386
16079	S70_R	70	2015-08-05	0	0	70
18563	S70_R	70	2015-08-05	0	0	70
20936	S70_R	70	2015-08-05	0	0	70
23420	S80_R	80	2015-08-05	0.35	0.889	80
25904	S75_R	75	2015-08-05	0	0	75
28388	S72_R	72	2015-08-05	0	0	72
30824	S75_R	75	2015-08-05	0	0	75
33260	S84	84	2015-08-05	0	0	84
35744	S97_R	97	2015-08-05	0	0	97
38228	S84_R	84	2015-08-05	0	0	84
40664	S97_R	97	2015-08-05	0.54	1.3716	97
43100	S153_R	153	2015-08-05	0	0	153
45585	S153_R	153	2015-08-05	0.14	0.3556	153
48069	S153_R	153	2015-08-05	0.14	0.3556	153
50505	S153	153	2015-08-05	0.14	0.3556	153
52941	S46	46	2015-08-05	0.08	0.2032	46
55377	S49	49	2015-08-05	0.45	1.143	49
2044	S153	153	2015-08-06	0	0	153
4480	S46	46	2015-08-06	0	0	46
6916	S49	49	2015-08-06	0.01	0.025	49
8744	S386B_R	386	2015-08-06	0	0	386
11180	S154_R	154	2015-08-06	0	0	154
13596	S386B_R	386	2015-08-06	0	0	386
16080	S70_R	70	2015-08-06	0	0	70
18564	S70_R	70	2015-08-06	0	0	70
20937	S70_R	70	2015-08-06	0	0	70
23421	S80_R	80	2015-08-06	0	0	80
25905	S75_R	75	2015-08-06	0	0	75
28389	S72_R	72	2015-08-06	0	0	72
30825	S75_R	75	2015-08-06	0	0	75
33261	S84	84	2015-08-06	0	0	84
35745	S97_R	97	2015-08-06	0.54	1.3716	97
38229	S84_R	84	2015-08-06	0	0	84
40665	S97_R	97	2015-08-06	0	0	97
43101	S153_R	153	2015-08-06	0.14	0.3556	153
45586	S153_R	153	2015-08-06	0	0	153
48070	S153_R	153	2015-08-06	0	0	153
50506	S153	153	2015-08-06	0	0	153
52942	S46	46	2015-08-06	0	0	46
55378	S49	49	2015-08-06	0.01	0.0254	49
2045	S153	153	2015-08-07	0	0	153
4481	S46	46	2015-08-07	0	0	46
6917	S49	49	2015-08-07	0	0	49
8745	S386B_R	386	2015-08-07	0	0	386
11181	S154_R	154	2015-08-07	0	0	154
13597	S386B_R	386	2015-08-07	0	0	386
16081	S70_R	70	2015-08-07	0	0	70
18565	S70_R	70	2015-08-07	0	0	70
20938	S70_R	70	2015-08-07	0	0	70
23422	S80_R	80	2015-08-07	0	0	80
25906	S75_R	75	2015-08-07	0	0	75
28390	S72_R	72	2015-08-07	0	0	72
30826	S75_R	75	2015-08-07	0	0	75
33262	S84	84	2015-08-07	0	0	84
35746	S97_R	97	2015-08-07	0	0	97
38230	S84_R	84	2015-08-07	0	0	84
40666	S97_R	97	2015-08-07	0	0	97
43102	S153_R	153	2015-08-07	0	0	153
45587	S153_R	153	2015-08-07	0	0	153
48071	S153_R	153	2015-08-07	0	0	153
50507	S153	153	2015-08-07	0	0	153
52943	S46	46	2015-08-07	0	0	46
55379	S49	49	2015-08-07	0	0	49
2046	S153	153	2015-08-08	0.02	0.051	153
4482	S46	46	2015-08-08	0	0	46
6918	S49	49	2015-08-08	0.01	0.025	49
8746	S386B_R	386	2015-08-08	0.16	0.4064	386
11182	S154_R	154	2015-08-08	0.06	0.1524	154
13598	S386B_R	386	2015-08-08	0.16	0.4064	386
16082	S70_R	70	2015-08-08	0	0	70
18566	S70_R	70	2015-08-08	0.06	0.1524	70
20939	S70_R	70	2015-08-08	0.06	0.1524	70
23423	S80_R	80	2015-08-08	0	0	80
25907	S75_R	75	2015-08-08	0.17	0.4318	75
28391	S72_R	72	2015-08-08	0.08	0.2032	72
30827	S75_R	75	2015-08-08	0.17	0.4318	75
33263	S84	84	2015-08-08	0	0	84
35747	S97_R	97	2015-08-08	0	0	97
38231	S84_R	84	2015-08-08	0.06	0.1524	84
40667	S97_R	97	2015-08-08	0	0	97
43103	S153_R	153	2015-08-08	0	0	153
45588	S153_R	153	2015-08-08	0.02	0.0508	153
48072	S153_R	153	2015-08-08	0.02	0.0508	153
50508	S153	153	2015-08-08	0.02	0.0508	153
52944	S46	46	2015-08-08	0	0	46
55380	S49	49	2015-08-08	0.01	0.0254	49
2047	S153	153	2015-08-09	0	0	153
4483	S46	46	2015-08-09	0	0	46
6919	S49	49	2015-08-09	0	0	49
8747	S386B_R	386	2015-08-09	0	0	386
11183	S154_R	154	2015-08-09	0.01	0.0254	154
13599	S386B_R	386	2015-08-09	0	0	386
16083	S70_R	70	2015-08-09	0.06	0.1524	70
18567	S70_R	70	2015-08-09	0	0	70
20940	S70_R	70	2015-08-09	0	0	70
23424	S80_R	80	2015-08-09	0	0	80
25908	S75_R	75	2015-08-09	0	0	75
28392	S72_R	72	2015-08-09	0.16	0.4064	72
30828	S75_R	75	2015-08-09	0	0	75
33264	S84	84	2015-08-09	0.06	0.1524	84
35748	S97_R	97	2015-08-09	0	0	97
38232	S84_R	84	2015-08-09	0	0	84
40668	S97_R	97	2015-08-09	0	0	97
43104	S153_R	153	2015-08-09	0.02	0.0508	153
45589	S153_R	153	2015-08-09	0	0	153
48073	S153_R	153	2015-08-09	0	0	153
50509	S153	153	2015-08-09	0	0	153
52945	S46	46	2015-08-09	0	0	46
55381	S49	49	2015-08-09	0	0	49
2048	S153	153	2015-08-10	0	0	153
4484	S46	46	2015-08-10	0.34	0.864	46
6920	S49	49	2015-08-10	0	0	49
8748	S386B_R	386	2015-08-10	0	0	386
11184	S154_R	154	2015-08-10	0.54	1.3716	154
13600	S386B_R	386	2015-08-10	0	0	386
16084	S70_R	70	2015-08-10	0.01	0.0254	70
18568	S70_R	70	2015-08-10	0.01	0.0254	70
20941	S70_R	70	2015-08-10	0.01	0.0254	70
23425	S80_R	80	2015-08-10	0.06	0.1524	80
25909	S75_R	75	2015-08-10	0	0	75
28393	S72_R	72	2015-08-10	0.04	0.1016	72
30829	S75_R	75	2015-08-10	0	0	75
33265	S84	84	2015-08-10	0	0	84
35749	S97_R	97	2015-08-10	0	0	97
38233	S84_R	84	2015-08-10	0.32	0.8128	84
40669	S97_R	97	2015-08-10	0.78	1.9812	97
43105	S153_R	153	2015-08-10	0	0	153
45590	S153_R	153	2015-08-10	0	0	153
48074	S153_R	153	2015-08-10	0	0	153
50510	S153	153	2015-08-10	0	0	153
52946	S46	46	2015-08-10	0.34	0.8636	46
55382	S49	49	2015-08-10	0	0	49
2049	S153	153	2015-08-11	0	0	153
4485	S46	46	2015-08-11	0	0	46
6921	S49	49	2015-08-11	0	0	49
8749	S386B_R	386	2015-08-11	0	0	386
11185	S154_R	154	2015-08-11	0.08	0.2032	154
13601	S386B_R	386	2015-08-11	0	0	386
16085	S70_R	70	2015-08-11	0	0	70
18569	S70_R	70	2015-08-11	0	0	70
20942	S70_R	70	2015-08-11	0	0	70
23426	S80_R	80	2015-08-11	0.25	0.635	80
25910	S75_R	75	2015-08-11	0	0	75
28394	S72_R	72	2015-08-11	0	0	72
30830	S75_R	75	2015-08-11	0	0	75
33266	S84	84	2015-08-11	0.32	0.8128	84
35750	S97_R	97	2015-08-11	0.78	1.9812	97
38234	S84_R	84	2015-08-11	0.01	0.0254	84
40670	S97_R	97	2015-08-11	0.08	0.2032	97
43106	S153_R	153	2015-08-11	0	0	153
45591	S153_R	153	2015-08-11	0	0	153
48075	S153_R	153	2015-08-11	0	0	153
50511	S153	153	2015-08-11	0	0	153
52947	S46	46	2015-08-11	0	0	46
55383	S49	49	2015-08-11	0	0	49
2050	S153	153	2015-08-12	0	0	153
4486	S46	46	2015-08-12	0	0	46
6922	S49	49	2015-08-12	0	0	49
8750	S386B_R	386	2015-08-12	0.24	0.6096	386
11186	S154_R	154	2015-08-12	0.59	1.4986	154
13602	S386B_R	386	2015-08-12	0.24	0.6096	386
16086	S70_R	70	2015-08-12	0	0	70
18570	S70_R	70	2015-08-12	0.04	0.1016	70
20943	S70_R	70	2015-08-12	0.04	0.1016	70
23427	S80_R	80	2015-08-12	0	0	80
25911	S75_R	75	2015-08-12	0	0	75
28395	S72_R	72	2015-08-12	0.11	0.2794	72
30831	S75_R	75	2015-08-12	0	0	75
33267	S84	84	2015-08-12	0.01	0.0254	84
35751	S97_R	97	2015-08-12	0.08	0.2032	97
38235	S84_R	84	2015-08-12	0.14	0.3556	84
40671	S97_R	97	2015-08-12	0	0	97
43107	S153_R	153	2015-08-12	0	0	153
45592	S153_R	153	2015-08-12	0	0	153
48076	S153_R	153	2015-08-12	0	0	153
50512	S153	153	2015-08-12	0	0	153
52948	S46	46	2015-08-12	0	0	46
55384	S49	49	2015-08-12	0	0	49
2051	S153	153	2015-08-13	0.48	1.219	153
4487	S46	46	2015-08-13	0.6	1.524	46
6923	S49	49	2015-08-13	1.15	2.921	49
8751	S386B_R	386	2015-08-13	0.3	0.762	386
11187	S154_R	154	2015-08-13	1.07	2.7178	154
13603	S386B_R	386	2015-08-13	0.3	0.762	386
16087	S70_R	70	2015-08-13	0.04	0.1016	70
18571	S70_R	70	2015-08-13	1.67	4.2418	70
20944	S70_R	70	2015-08-13	1.67	4.2418	70
23428	S80_R	80	2015-08-13	0.16	0.4064	80
25912	S75_R	75	2015-08-13	1.14	2.8956	75
28396	S72_R	72	2015-08-13	0.33	0.8382	72
30832	S75_R	75	2015-08-13	1.14	2.8956	75
33268	S84	84	2015-08-13	0.14	0.3556	84
35752	S97_R	97	2015-08-13	0	0	97
38236	S84_R	84	2015-08-13	0.53	1.3462	84
40672	S97_R	97	2015-08-13	0.48	1.2192	97
43108	S153_R	153	2015-08-13	0	0	153
45593	S153_R	153	2015-08-13	0.48	1.2192	153
48077	S153_R	153	2015-08-13	0.48	1.2192	153
50513	S153	153	2015-08-13	0.48	1.2192	153
52949	S46	46	2015-08-13	0.6	1.524	46
55385	S49	49	2015-08-13	1.15	2.921	49
2052	S153	153	2015-08-14	0.15	0.381	153
4488	S46	46	2015-08-14	0	0	46
6924	S49	49	2015-08-14	0.4	1.016	49
8752	S386B_R	386	2015-08-14	0	0	386
11188	S154_R	154	2015-08-14	0.13	0.3302	154
13604	S386B_R	386	2015-08-14	0	0	386
16088	S70_R	70	2015-08-14	1.67	4.2418	70
18572	S70_R	70	2015-08-14	0.23	0.5842	70
20945	S70_R	70	2015-08-14	0.23	0.5842	70
23429	S80_R	80	2015-08-14	0.07	0.1778	80
25913	S75_R	75	2015-08-14	0.23	0.5842	75
28397	S72_R	72	2015-08-14	0.16	0.4064	72
30833	S75_R	75	2015-08-14	0.23	0.5842	75
33269	S84	84	2015-08-14	0.53	1.3462	84
35753	S97_R	97	2015-08-14	0.48	1.2192	97
38237	S84_R	84	2015-08-14	0.2	0.508	84
40673	S97_R	97	2015-08-14	0.01	0.0254	97
43109	S153_R	153	2015-08-14	0.48	1.2192	153
45594	S153_R	153	2015-08-14	0.15	0.381	153
48078	S153_R	153	2015-08-14	0.15	0.381	153
50514	S153	153	2015-08-14	0.15	0.381	153
52950	S46	46	2015-08-14	0	0	46
55386	S49	49	2015-08-14	0.4	1.016	49
2053	S153	153	2015-08-15	1.23	3.124	153
4489	S46	46	2015-08-15	0.41	1.041	46
6925	S49	49	2015-08-15	0.24	0.61	49
8753	S386B_R	386	2015-08-15	0.01	0.0254	386
11189	S154_R	154	2015-08-15	0.21	0.5334	154
13605	S386B_R	386	2015-08-15	0.01	0.0254	386
16089	S70_R	70	2015-08-15	0.23	0.5842	70
18573	S70_R	70	2015-08-15	0.63	1.6002	70
20946	S70_R	70	2015-08-15	0.63	1.6002	70
23430	S80_R	80	2015-08-15	0.13	0.3302	80
25914	S75_R	75	2015-08-15	0.67	1.7018	75
28398	S72_R	72	2015-08-15	0.13	0.3302	72
30834	S75_R	75	2015-08-15	0.67	1.7018	75
33270	S84	84	2015-08-15	0.2	0.508	84
35754	S97_R	97	2015-08-15	0.01	0.0254	97
38238	S84_R	84	2015-08-15	0.81	2.0574	84
40674	S97_R	97	2015-08-15	0.11	0.2794	97
43110	S153_R	153	2015-08-15	0.15	0.381	153
45595	S153_R	153	2015-08-15	1.23	3.1242	153
48079	S153_R	153	2015-08-15	1.23	3.1242	153
50515	S153	153	2015-08-15	1.23	3.1242	153
52951	S46	46	2015-08-15	0.41	1.0414	46
55387	S49	49	2015-08-15	0.24	0.6096	49
2054	S153	153	2015-08-16	0.01	0.025	153
4490	S46	46	2015-08-16	0.36	0.914	46
6926	S49	49	2015-08-16	0.14	0.356	49
8754	S386B_R	386	2015-08-16	0.1	0.254	386
11190	S154_R	154	2015-08-16	0.01	0.0254	154
13606	S386B_R	386	2015-08-16	0.1	0.254	386
16090	S70_R	70	2015-08-16	0.63	1.6002	70
18574	S70_R	70	2015-08-16	0	0	70
20947	S70_R	70	2015-08-16	0	0	70
23431	S80_R	80	2015-08-16	0	0	80
25915	S75_R	75	2015-08-16	0.01	0.0254	75
28399	S72_R	72	2015-08-16	0.01	0.0254	72
30835	S75_R	75	2015-08-16	0.01	0.0254	75
33271	S84	84	2015-08-16	0.82	2.0828	84
35755	S97_R	97	2015-08-16	0.11	0.2794	97
38239	S84_R	84	2015-08-16	0.01	0.0254	84
40675	S97_R	97	2015-08-16	0.01	0.0254	97
43111	S153_R	153	2015-08-16	1.23	3.1242	153
45596	S153_R	153	2015-08-16	0.01	0.0254	153
48080	S153_R	153	2015-08-16	0.01	0.0254	153
50516	S153	153	2015-08-16	0.01	0.0254	153
52952	S46	46	2015-08-16	0.36	0.9144	46
55388	S49	49	2015-08-16	0.14	0.3556	49
2055	S153	153	2015-08-17	0	0	153
4491	S46	46	2015-08-17	0	0	46
6927	S49	49	2015-08-17	0.41	1.041	49
8755	S386B_R	386	2015-08-17	0.11	0.2794	386
11191	S154_R	154	2015-08-17	0	0	154
13607	S386B_R	386	2015-08-17	0.11	0.2794	386
16091	S70_R	70	2015-08-17	0	0	70
18575	S70_R	70	2015-08-17	0	0	70
20948	S70_R	70	2015-08-17	0	0	70
23432	S80_R	80	2015-08-17	0	0	80
25916	S75_R	75	2015-08-17	0	0	75
28400	S72_R	72	2015-08-17	0	0	72
30836	S75_R	75	2015-08-17	0	0	75
33272	S84	84	2015-08-17	0	0	84
35756	S97_R	97	2015-08-17	0.01	0.0254	97
38240	S84_R	84	2015-08-17	0	0	84
40676	S97_R	97	2015-08-17	0	0	97
43112	S153_R	153	2015-08-17	0.01	0.0254	153
45597	S153_R	153	2015-08-17	0	0	153
48081	S153_R	153	2015-08-17	0	0	153
50517	S153	153	2015-08-17	0	0	153
52953	S46	46	2015-08-17	0	0	46
55389	S49	49	2015-08-17	0.41	1.0414	49
2056	S153	153	2015-08-18	0.04	0.102	153
4492	S46	46	2015-08-18	0	0	46
6928	S49	49	2015-08-18	0.6	1.524	49
8756	S386B_R	386	2015-08-18	0.04	0.1016	386
11192	S154_R	154	2015-08-18	0	0	154
13608	S386B_R	386	2015-08-18	0.04	0.1016	386
16092	S70_R	70	2015-08-18	0	0	70
18576	S70_R	70	2015-08-18	0	0	70
20949	S70_R	70	2015-08-18	0	0	70
23433	S80_R	80	2015-08-18	0	0	80
25917	S75_R	75	2015-08-18	0	0	75
28401	S72_R	72	2015-08-18	0	0	72
30837	S75_R	75	2015-08-18	0	0	75
33273	S84	84	2015-08-18	0	0	84
35757	S97_R	97	2015-08-18	0	0	97
38241	S84_R	84	2015-08-18	0	0	84
40677	S97_R	97	2015-08-18	1.23	3.1242	97
43113	S153_R	153	2015-08-18	0	0	153
45598	S153_R	153	2015-08-18	0.04	0.1016	153
48082	S153_R	153	2015-08-18	0.04	0.1016	153
50518	S153	153	2015-08-18	0.04	0.1016	153
52954	S46	46	2015-08-18	0	0	46
55390	S49	49	2015-08-18	0.6	1.524	49
2057	S153	153	2015-08-19	0.03	0.076	153
4493	S46	46	2015-08-19	0	0	46
6929	S49	49	2015-08-19	0	0	49
8757	S386B_R	386	2015-08-19	0	0	386
11193	S154_R	154	2015-08-19	0.09	0.2286	154
13609	S386B_R	386	2015-08-19	0	0	386
16093	S70_R	70	2015-08-19	0	0	70
18577	S70_R	70	2015-08-19	0.01	0.0254	70
20950	S70_R	70	2015-08-19	0.01	0.0254	70
23434	S80_R	80	2015-08-19	0	0	80
25918	S75_R	75	2015-08-19	0.21	0.5334	75
28402	S72_R	72	2015-08-19	0.23	0.5842	72
30838	S75_R	75	2015-08-19	0.21	0.5334	75
33274	S84	84	2015-08-19	0	0	84
35758	S97_R	97	2015-08-19	1.23	3.1242	97
38242	S84_R	84	2015-08-19	0	0	84
40678	S97_R	97	2015-08-19	0.01	0.0254	97
43114	S153_R	153	2015-08-19	0.04	0.1016	153
45599	S153_R	153	2015-08-19	0.03	0.0762	153
48083	S153_R	153	2015-08-19	0.03	0.0762	153
50519	S153	153	2015-08-19	0.03	0.0762	153
52955	S46	46	2015-08-19	0	0	46
55391	S49	49	2015-08-19	0	0	49
2058	S153	153	2015-08-20	0	0	153
4494	S46	46	2015-08-20	0	0	46
6930	S49	49	2015-08-20	0	0	49
8758	S386B_R	386	2015-08-20	0	0	386
11194	S154_R	154	2015-08-20	0	0	154
13610	S386B_R	386	2015-08-20	0	0	386
16094	S70_R	70	2015-08-20	0.02	0.0508	70
18578	S70_R	70	2015-08-20	0.01	0.0254	70
20951	S70_R	70	2015-08-20	0.01	0.0254	70
23435	S80_R	80	2015-08-20	0	0	80
25919	S75_R	75	2015-08-20	0.01	0.0254	75
28403	S72_R	72	2015-08-20	0.01	0.0254	72
30839	S75_R	75	2015-08-20	0.01	0.0254	75
33275	S84	84	2015-08-20	0	0	84
35759	S97_R	97	2015-08-20	0.01	0.0254	97
38243	S84_R	84	2015-08-20	0	0	84
40679	S97_R	97	2015-08-20	0	0	97
43115	S153_R	153	2015-08-20	0.03	0.0762	153
45600	S153_R	153	2015-08-20	0	0	153
48084	S153_R	153	2015-08-20	0	0	153
50520	S153	153	2015-08-20	0	0	153
52956	S46	46	2015-08-20	0	0	46
55392	S49	49	2015-08-20	0	0	49
2059	S153	153	2015-08-21	0	0	153
4495	S46	46	2015-08-21	0	0	46
6931	S49	49	2015-08-21	0.09	0.229	49
8759	S386B_R	386	2015-08-21	0.03	0.0762	386
11195	S154_R	154	2015-08-21	0.01	0.0254	154
13611	S386B_R	386	2015-08-21	0.03	0.0762	386
16095	S70_R	70	2015-08-21	0	0	70
18579	S70_R	70	2015-08-21	0	0	70
20952	S70_R	70	2015-08-21	0	0	70
23436	S80_R	80	2015-08-21	0.36	0.9144	80
25920	S75_R	75	2015-08-21	0.04	0.1016	75
28404	S72_R	72	2015-08-21	0.11	0.2794	72
30840	S75_R	75	2015-08-21	0.04	0.1016	75
33276	S84	84	2015-08-21	0	0	84
35760	S97_R	97	2015-08-21	0	0	97
38244	S84_R	84	2015-08-21	0.03	0.0762	84
40680	S97_R	97	2015-08-21	0	0	97
43116	S153_R	153	2015-08-21	0	0	153
45601	S153_R	153	2015-08-21	0	0	153
48085	S153_R	153	2015-08-21	0	0	153
50521	S153	153	2015-08-21	0	0	153
52957	S46	46	2015-08-21	0	0	46
55393	S49	49	2015-08-21	0.09	0.2286	49
2060	S153	153	2015-08-22	0	0	153
4496	S46	46	2015-08-22	0	0	46
6932	S49	49	2015-08-22	0.01	0.025	49
8760	S386B_R	386	2015-08-22	0.04	0.1016	386
11196	S154_R	154	2015-08-22	0.01	0.0254	154
13612	S386B_R	386	2015-08-22	0.04	0.1016	386
16096	S70_R	70	2015-08-22	0	0	70
18580	S70_R	70	2015-08-22	0	0	70
20953	S70_R	70	2015-08-22	0	0	70
23437	S80_R	80	2015-08-22	0	0	80
25921	S75_R	75	2015-08-22	0.01	0.0254	75
28405	S72_R	72	2015-08-22	0	0	72
30841	S75_R	75	2015-08-22	0.01	0.0254	75
33277	S84	84	2015-08-22	0.03	0.0762	84
35761	S97_R	97	2015-08-22	0	0	97
38245	S84_R	84	2015-08-22	0	0	84
40681	S97_R	97	2015-08-22	0	0	97
43117	S153_R	153	2015-08-22	0	0	153
45602	S153_R	153	2015-08-22	0	0	153
48086	S153_R	153	2015-08-22	0	0	153
50522	S153	153	2015-08-22	0	0	153
52958	S46	46	2015-08-22	0	0	46
55394	S49	49	2015-08-22	0.01	0.0254	49
2061	S153	153	2015-08-23	1	2.54	153
4497	S46	46	2015-08-23	0	0	46
6933	S49	49	2015-08-23	0	0	49
8761	S386B_R	386	2015-08-23	0.01	0.0254	386
11197	S154_R	154	2015-08-23	0	0	154
13613	S386B_R	386	2015-08-23	0.01	0.0254	386
16097	S70_R	70	2015-08-23	0	0	70
18581	S70_R	70	2015-08-23	0	0	70
20954	S70_R	70	2015-08-23	0	0	70
23438	S80_R	80	2015-08-23	0	0	80
25922	S75_R	75	2015-08-23	0	0	75
28406	S72_R	72	2015-08-23	0	0	72
30842	S75_R	75	2015-08-23	0	0	75
33278	S84	84	2015-08-23	0	0	84
35762	S97_R	97	2015-08-23	0	0	97
38246	S84_R	84	2015-08-23	0	0	84
40682	S97_R	97	2015-08-23	0	0	97
43118	S153_R	153	2015-08-23	0	0	153
45603	S153_R	153	2015-08-23	1	2.54	153
48087	S153_R	153	2015-08-23	1	2.54	153
50523	S153	153	2015-08-23	1	2.54	153
52959	S46	46	2015-08-23	0	0	46
55395	S49	49	2015-08-23	0	0	49
2062	S153	153	2015-08-24	0	0	153
4498	S46	46	2015-08-24	0	0	46
6934	S49	49	2015-08-24	0	0	49
8762	S386B_R	386	2015-08-24	0.28	0.7112	386
11198	S154_R	154	2015-08-24	0.56	1.4224	154
13614	S386B_R	386	2015-08-24	0.28	0.7112	386
16098	S70_R	70	2015-08-24	0	0	70
18582	S70_R	70	2015-08-24	0	0	70
20955	S70_R	70	2015-08-24	0	0	70
23439	S80_R	80	2015-08-24	0	0	80
25923	S75_R	75	2015-08-24	0	0	75
28407	S72_R	72	2015-08-24	0.42	1.0668	72
30843	S75_R	75	2015-08-24	0	0	75
33279	S84	84	2015-08-24	0	0	84
35763	S97_R	97	2015-08-24	0	0	97
38247	S84_R	84	2015-08-24	0.09	0.2286	84
40683	S97_R	97	2015-08-24	0	0	97
43119	S153_R	153	2015-08-24	1	2.54	153
45604	S153_R	153	2015-08-24	0	0	153
48088	S153_R	153	2015-08-24	0	0	153
50524	S153	153	2015-08-24	0	0	153
52960	S46	46	2015-08-24	0	0	46
55396	S49	49	2015-08-24	0	0	49
2063	S153	153	2015-08-25	0.01	0.025	153
4499	S46	46	2015-08-25	0.02	0.051	46
6935	S49	49	2015-08-25	1.13	2.87	49
8763	S386B_R	386	2015-08-25	0.01	0.0254	386
11199	S154_R	154	2015-08-25	0.01	0.0254	154
13615	S386B_R	386	2015-08-25	0.01	0.0254	386
16099	S70_R	70	2015-08-25	0	0	70
18583	S70_R	70	2015-08-25	0.15	0.381	70
20956	S70_R	70	2015-08-25	0.15	0.381	70
23440	S80_R	80	2015-08-25	0.27	0.6858	80
25924	S75_R	75	2015-08-25	0	0	75
28408	S72_R	72	2015-08-25	0.01	0.0254	72
30844	S75_R	75	2015-08-25	0	0	75
33280	S84	84	2015-08-25	0.09	0.2286	84
35764	S97_R	97	2015-08-25	0	0	97
38248	S84_R	84	2015-08-25	0	0	84
40684	S97_R	97	2015-08-25	0.85	2.159	97
43120	S153_R	153	2015-08-25	0	0	153
45605	S153_R	153	2015-08-25	0.01	0.0254	153
48089	S153_R	153	2015-08-25	0.01	0.0254	153
50525	S153	153	2015-08-25	0.01	0.0254	153
52961	S46	46	2015-08-25	0.02	0.0508	46
55397	S49	49	2015-08-25	1.13	2.8702	49
2064	S153	153	2015-08-26	0.1	0.254	153
4500	S46	46	2015-08-26	0.21	0.533	46
6936	S49	49	2015-08-26	1.5	3.81	49
8764	S386B_R	386	2015-08-26	0	0	386
11200	S154_R	154	2015-08-26	0.02	0.0508	154
13616	S386B_R	386	2015-08-26	0	0	386
16100	S70_R	70	2015-08-26	0.15	0.381	70
18584	S70_R	70	2015-08-26	0.46	1.1684	70
20957	S70_R	70	2015-08-26	0.46	1.1684	70
23441	S80_R	80	2015-08-26	0.23	0.5842	80
25925	S75_R	75	2015-08-26	0.5	1.27	75
28409	S72_R	72	2015-08-26	0.01	0.0254	72
30845	S75_R	75	2015-08-26	0.5	1.27	75
33281	S84	84	2015-08-26	0	0	84
35765	S97_R	97	2015-08-26	0.85	2.159	97
38249	S84_R	84	2015-08-26	0.05	0.127	84
40685	S97_R	97	2015-08-26	0.29	0.7366	97
43121	S153_R	153	2015-08-26	0.01	0.0254	153
45606	S153_R	153	2015-08-26	0.1	0.254	153
48090	S153_R	153	2015-08-26	0.1	0.254	153
50526	S153	153	2015-08-26	0.1	0.254	153
52962	S46	46	2015-08-26	0.21	0.5334	46
55398	S49	49	2015-08-26	1.5	3.81	49
2065	S153	153	2015-08-27	0.41	1.041	153
4501	S46	46	2015-08-27	1.56	3.962	46
6937	S49	49	2015-08-27	0.1	0.254	49
8765	S386B_R	386	2015-08-27	0.01	0.0254	386
11201	S154_R	154	2015-08-27	0.11	0.2794	154
13617	S386B_R	386	2015-08-27	0.01	0.0254	386
16101	S70_R	70	2015-08-27	0.47	1.1938	70
18585	S70_R	70	2015-08-27	0.43	1.0922	70
20958	S70_R	70	2015-08-27	0.43	1.0922	70
23442	S80_R	80	2015-08-27	1.5	3.81	80
25926	S75_R	75	2015-08-27	0.3	0.762	75
28410	S72_R	72	2015-08-27	0.59	1.4986	72
30846	S75_R	75	2015-08-27	0.3	0.762	75
33282	S84	84	2015-08-27	0.05	0.127	84
35766	S97_R	97	2015-08-27	0.29	0.7366	97
38250	S84_R	84	2015-08-27	0.29	0.7366	84
40686	S97_R	97	2015-08-27	0.1	0.254	97
43122	S153_R	153	2015-08-27	0.1	0.254	153
45607	S153_R	153	2015-08-27	0.41	1.0414	153
48091	S153_R	153	2015-08-27	0.41	1.0414	153
50527	S153	153	2015-08-27	0.41	1.0414	153
52963	S46	46	2015-08-27	1.56	3.9624	46
55399	S49	49	2015-08-27	0.1	0.254	49
2066	S153	153	2015-08-28	0.3	0.762	153
4502	S46	46	2015-08-28	1.1	2.794	46
6938	S49	49	2015-08-28	0.11	0.279	49
8766	S386B_R	386	2015-08-28	1.79	4.5466	386
11202	S154_R	154	2015-08-28	0.13	0.3302	154
13618	S386B_R	386	2015-08-28	1.79	4.5466	386
16102	S70_R	70	2015-08-28	0.42	1.0668	70
18586	S70_R	70	2015-08-28	0.67	1.7018	70
20959	S70_R	70	2015-08-28	0.67	1.7018	70
23443	S80_R	80	2015-08-28	0.01	0.0254	80
25927	S75_R	75	2015-08-28	1.04	2.6416	75
28411	S72_R	72	2015-08-28	0.24	0.6096	72
30847	S75_R	75	2015-08-28	1.04	2.6416	75
33283	S84	84	2015-08-28	0.29	0.7366	84
35767	S97_R	97	2015-08-28	0.1	0.254	97
38251	S84_R	84	2015-08-28	0.13	0.3302	84
40687	S97_R	97	2015-08-28	0.1	0.254	97
43123	S153_R	153	2015-08-28	0.41	1.0414	153
45608	S153_R	153	2015-08-28	0.3	0.762	153
48092	S153_R	153	2015-08-28	0.3	0.762	153
50528	S153	153	2015-08-28	0.3	0.762	153
52964	S46	46	2015-08-28	1.1	2.794	46
55400	S49	49	2015-08-28	0.11	0.2794	49
2067	S153	153	2015-08-29	0.03	0.076	153
4503	S46	46	2015-08-29	0.09	0.229	46
6939	S49	49	2015-08-29	0.14	0.356	49
8767	S386B_R	386	2015-08-29	0.44	1.1176	386
11203	S154_R	154	2015-08-29	0.19	0.4826	154
13619	S386B_R	386	2015-08-29	0.44	1.1176	386
16103	S70_R	70	2015-08-29	0.67	1.7018	70
18587	S70_R	70	2015-08-29	0.17	0.4318	70
20960	S70_R	70	2015-08-29	0.17	0.4318	70
23444	S80_R	80	2015-08-29	0.76	1.9304	80
25928	S75_R	75	2015-08-29	0.33	0.8382	75
28412	S72_R	72	2015-08-29	0.83	2.1082	72
30848	S75_R	75	2015-08-29	0.33	0.8382	75
33284	S84	84	2015-08-29	0.14	0.3556	84
35768	S97_R	97	2015-08-29	0.1	0.254	97
38252	S84_R	84	2015-08-29	0.53	1.3462	84
40688	S97_R	97	2015-08-29	0.28	0.7112	97
43124	S153_R	153	2015-08-29	0.31	0.7874	153
45609	S153_R	153	2015-08-29	0.03	0.0762	153
48093	S153_R	153	2015-08-29	0.03	0.0762	153
50529	S153	153	2015-08-29	0.03	0.0762	153
52965	S46	46	2015-08-29	0.09	0.2286	46
55401	S49	49	2015-08-29	0.14	0.3556	49
2068	S153	153	2015-08-30	0.47	1.194	153
4504	S46	46	2015-08-30	2.16	5.486	46
6940	S49	49	2015-08-30	1	2.54	49
8768	S386B_R	386	2015-08-30	1.79	4.5466	386
11204	S154_R	154	2015-08-30	2.22	5.6388	154
13620	S386B_R	386	2015-08-30	1.79	4.5466	386
16104	S70_R	70	2015-08-30	0.17	0.4318	70
18588	S70_R	70	2015-08-30	0.26	0.6604	70
20961	S70_R	70	2015-08-30	0.26	0.6604	70
23445	S80_R	80	2015-08-30	0.3	0.762	80
25929	S75_R	75	2015-08-30	0.15	0.381	75
28413	S72_R	72	2015-08-30	0.12	0.3048	72
30849	S75_R	75	2015-08-30	0.15	0.381	75
33285	S84	84	2015-08-30	0.52	1.3208	84
35769	S97_R	97	2015-08-30	0.49	1.2446	97
38253	S84_R	84	2015-08-30	0.18	0.4572	84
40689	S97_R	97	2015-08-30	1.15	2.921	97
43125	S153_R	153	2015-08-30	0.09	0.2286	153
45610	S153_R	153	2015-08-30	0.47	1.1938	153
48094	S153_R	153	2015-08-30	0.47	1.1938	153
50530	S153	153	2015-08-30	0.47	1.1938	153
52966	S46	46	2015-08-30	2.16	5.4864	46
55402	S49	49	2015-08-30	1	2.54	49
2069	S153	153	2015-08-31	0.21	0.533	153
4505	S46	46	2015-08-31	0	0	46
6941	S49	49	2015-08-31	0.27	0.686	49
8769	S386B_R	386	2015-08-31	0.03	0.0762	386
11205	S154_R	154	2015-08-31	0	0	154
13621	S386B_R	386	2015-08-31	0.03	0.0762	386
16105	S70_R	70	2015-08-31	0.26	0.6604	70
18589	S70_R	70	2015-08-31	0.57	1.4478	70
20962	S70_R	70	2015-08-31	0.57	1.4478	70
23446	S80_R	80	2015-08-31	0	0	80
25930	S75_R	75	2015-08-31	0.36	0.9144	75
28414	S72_R	72	2015-08-31	0	0	72
30850	S75_R	75	2015-08-31	0.36	0.9144	75
33286	S84	84	2015-08-31	0.18	0.4572	84
35770	S97_R	97	2015-08-31	0.94	2.3876	97
38254	S84_R	84	2015-08-31	0	0	84
40690	S97_R	97	2015-08-31	0.11	0.2794	97
43126	S153_R	153	2015-08-31	0.4	1.016	153
45611	S153_R	153	2015-08-31	0.21	0.5334	153
48095	S153_R	153	2015-08-31	0.21	0.5334	153
50531	S153	153	2015-08-31	0.21	0.5334	153
52967	S46	46	2015-08-31	0	0	46
55403	S49	49	2015-08-31	0.27	0.6858	49
2070	S153	153	2015-09-01	0.13	0.33	153
4506	S46	46	2015-09-01	0	0	46
6942	S49	49	2015-09-01	0.02	0.051	49
8770	S386B_R	386	2015-09-01	0.01	0.0254	386
11206	S154_R	154	2015-09-01	0	0	154
13622	S386B_R	386	2015-09-01	0.01	0.0254	386
16106	S70_R	70	2015-09-01	0.57	1.4478	70
18590	S70_R	70	2015-09-01	0	0	70
20963	S70_R	70	2015-09-01	0	0	70
23447	S80_R	80	2015-09-01	0.01	0.0254	80
25931	S75_R	75	2015-09-01	0.01	0.0254	75
28415	S72_R	72	2015-09-01	0.01	0.0254	72
30851	S75_R	75	2015-09-01	0.01	0.0254	75
33287	S84	84	2015-09-01	0	0	84
35771	S97_R	97	2015-09-01	0.1	0.254	97
38255	S84_R	84	2015-09-01	0	0	84
40691	S97_R	97	2015-09-01	0.01	0.0254	97
43127	S153_R	153	2015-09-01	0.22	0.5588	153
45612	S153_R	153	2015-09-01	0.13	0.3302	153
48096	S153_R	153	2015-09-01	0.13	0.3302	153
50532	S153	153	2015-09-01	0.13	0.3302	153
52968	S46	46	2015-09-01	0	0	46
55404	S49	49	2015-09-01	0.02	0.0508	49
2071	S153	153	2015-09-02	0	0	153
4507	S46	46	2015-09-02	0	0	46
6943	S49	49	2015-09-02	0	0	49
8771	S386B_R	386	2015-09-02	0	0	386
11207	S154_R	154	2015-09-02	0	0	154
13623	S386B_R	386	2015-09-02	0	0	386
16107	S70_R	70	2015-09-02	0	0	70
18591	S70_R	70	2015-09-02	0	0	70
20964	S70_R	70	2015-09-02	0	0	70
23448	S80_R	80	2015-09-02	0	0	80
25932	S75_R	75	2015-09-02	0	0	75
28416	S72_R	72	2015-09-02	0	0	72
30852	S75_R	75	2015-09-02	0	0	75
33288	S84	84	2015-09-02	0	0	84
35772	S97_R	97	2015-09-02	0.01	0.0254	97
38256	S84_R	84	2015-09-02	0	0	84
40692	S97_R	97	2015-09-02	0	0	97
43128	S153_R	153	2015-09-02	0.12	0.3048	153
45613	S153_R	153	2015-09-02	0	0	153
48097	S153_R	153	2015-09-02	0	0	153
50533	S153	153	2015-09-02	0	0	153
52969	S46	46	2015-09-02	0	0	46
55405	S49	49	2015-09-02	0	0	49
2072	S153	153	2015-09-03	0	0	153
4508	S46	46	2015-09-03	0.16	0.406	46
6944	S49	49	2015-09-03	0.34	0.864	49
8772	S386B_R	386	2015-09-03	0	0	386
11208	S154_R	154	2015-09-03	0	0	154
13624	S386B_R	386	2015-09-03	0	0	386
16108	S70_R	70	2015-09-03	0	0	70
18592	S70_R	70	2015-09-03	0.23	0.5842	70
20965	S70_R	70	2015-09-03	0.23	0.5842	70
23449	S80_R	80	2015-09-03	0.16	0.4064	80
25933	S75_R	75	2015-09-03	0	0	75
28417	S72_R	72	2015-09-03	0	0	72
30853	S75_R	75	2015-09-03	0	0	75
33289	S84	84	2015-09-03	0	0	84
35773	S97_R	97	2015-09-03	0	0	97
38257	S84_R	84	2015-09-03	0	0	84
40693	S97_R	97	2015-09-03	0	0	97
43129	S153_R	153	2015-09-03	0	0	153
45614	S153_R	153	2015-09-03	0	0	153
48098	S153_R	153	2015-09-03	0	0	153
50534	S153	153	2015-09-03	0	0	153
52970	S46	46	2015-09-03	0.16	0.4064	46
55406	S49	49	2015-09-03	0.34	0.8636	49
2073	S153	153	2015-09-04	0	0	153
4509	S46	46	2015-09-04	0.37	0.94	46
6945	S49	49	2015-09-04	0.01	0.025	49
8773	S386B_R	386	2015-09-04	0	0	386
11209	S154_R	154	2015-09-04	0.04	0.1016	154
13625	S386B_R	386	2015-09-04	0	0	386
16109	S70_R	70	2015-09-04	0.24	0.6096	70
18593	S70_R	70	2015-09-04	0.28	0.7112	70
20966	S70_R	70	2015-09-04	0.28	0.7112	70
23450	S80_R	80	2015-09-04	0.2	0.508	80
25934	S75_R	75	2015-09-04	0.1	0.254	75
28418	S72_R	72	2015-09-04	0.07	0.1778	72
30854	S75_R	75	2015-09-04	0.1	0.254	75
33290	S84	84	2015-09-04	0	0	84
35774	S97_R	97	2015-09-04	0	0	97
38258	S84_R	84	2015-09-04	0.03	0.0762	84
40694	S97_R	97	2015-09-04	0.62	1.5748	97
43130	S153_R	153	2015-09-04	0	0	153
45615	S153_R	153	2015-09-04	0	0	153
48099	S153_R	153	2015-09-04	0	0	153
50535	S153	153	2015-09-04	0	0	153
52971	S46	46	2015-09-04	0.37	0.9398	46
55407	S49	49	2015-09-04	0.01	0.0254	49
2074	S153	153	2015-09-05	0.84	2.134	153
4510	S46	46	2015-09-05	1.74	4.42	46
6946	S49	49	2015-09-05	0.34	0.864	49
8774	S386B_R	386	2015-09-05	1.76	4.4704	386
11210	S154_R	154	2015-09-05	1	2.54	154
13626	S386B_R	386	2015-09-05	1.76	4.4704	386
16110	S70_R	70	2015-09-05	0.28	0.7112	70
18594	S70_R	70	2015-09-05	0.38	0.9652	70
20967	S70_R	70	2015-09-05	0.38	0.9652	70
23451	S80_R	80	2015-09-05	0.06	0.1524	80
25935	S75_R	75	2015-09-05	1.51	3.8354	75
28419	S72_R	72	2015-09-05	0.99	2.5146	72
30855	S75_R	75	2015-09-05	1.51	3.8354	75
33291	S84	84	2015-09-05	0.03	0.0762	84
35775	S97_R	97	2015-09-05	0.62	1.5748	97
38259	S84_R	84	2015-09-05	0.86	2.1844	84
40695	S97_R	97	2015-09-05	0.12	0.3048	97
43131	S153_R	153	2015-09-05	0	0	153
45616	S153_R	153	2015-09-05	0.84	2.1336	153
48100	S153_R	153	2015-09-05	0.84	2.1336	153
50536	S153	153	2015-09-05	0.84	2.1336	153
52972	S46	46	2015-09-05	1.74	4.4196	46
55408	S49	49	2015-09-05	0.34	0.8636	49
2075	S153	153	2015-09-06	0	0	153
4511	S46	46	2015-09-06	0	0	46
6947	S49	49	2015-09-06	0.07	0.178	49
8775	S386B_R	386	2015-09-06	0.46	1.1684	386
11211	S154_R	154	2015-09-06	0.51	1.2954	154
13627	S386B_R	386	2015-09-06	0.46	1.1684	386
16111	S70_R	70	2015-09-06	0.37	0.9398	70
18595	S70_R	70	2015-09-06	0.84	2.1336	70
20968	S70_R	70	2015-09-06	0.84	2.1336	70
23452	S80_R	80	2015-09-06	0	0	80
25936	S75_R	75	2015-09-06	0.76	1.9304	75
28420	S72_R	72	2015-09-06	1.16	2.9464	72
30856	S75_R	75	2015-09-06	0.76	1.9304	75
33292	S84	84	2015-09-06	0.86	2.1844	84
35776	S97_R	97	2015-09-06	0.47	1.1938	97
38260	S84_R	84	2015-09-06	0.13	0.3302	84
40696	S97_R	97	2015-09-06	0.35	0.889	97
43132	S153_R	153	2015-09-06	0.84	2.1336	153
45617	S153_R	153	2015-09-06	0	0	153
48101	S153_R	153	2015-09-06	0	0	153
50537	S153	153	2015-09-06	0	0	153
52973	S46	46	2015-09-06	0	0	46
55409	S49	49	2015-09-06	0.07	0.1778	49
2076	S153	153	2015-09-07	0.12	0.305	153
4512	S46	46	2015-09-07	0.68	1.727	46
6948	S49	49	2015-09-07	0.8	2.032	49
8776	S386B_R	386	2015-09-07	0.01	0.0254	386
11212	S154_R	154	2015-09-07	0.08	0.2032	154
13628	S386B_R	386	2015-09-07	0.01	0.0254	386
16112	S70_R	70	2015-09-07	0.84	2.1336	70
18596	S70_R	70	2015-09-07	0.06	0.1524	70
20969	S70_R	70	2015-09-07	0.06	0.1524	70
23453	S80_R	80	2015-09-07	0.13	0.3302	80
25937	S75_R	75	2015-09-07	0.03	0.0762	75
28421	S72_R	72	2015-09-07	0.04	0.1016	72
30857	S75_R	75	2015-09-07	0.03	0.0762	75
33293	S84	84	2015-09-07	0.29	0.7366	84
35777	S97_R	97	2015-09-07	0	0	97
38261	S84_R	84	2015-09-07	0.04	0.1016	84
40697	S97_R	97	2015-09-07	0.52	1.3208	97
43133	S153_R	153	2015-09-07	0	0	153
45618	S153_R	153	2015-09-07	0.12	0.3048	153
48102	S153_R	153	2015-09-07	0.12	0.3048	153
50538	S153	153	2015-09-07	0.12	0.3048	153
52974	S46	46	2015-09-07	0.68	1.7272	46
55410	S49	49	2015-09-07	0.8	2.032	49
2077	S153	153	2015-09-08	0.01	0.025	153
4513	S46	46	2015-09-08	0	0	46
6949	S49	49	2015-09-08	0	0	49
8777	S386B_R	386	2015-09-08	0	0	386
11213	S154_R	154	2015-09-08	0.01	0.0254	154
13629	S386B_R	386	2015-09-08	0	0	386
16113	S70_R	70	2015-09-08	0.06	0.1524	70
18597	S70_R	70	2015-09-08	0	0	70
20970	S70_R	70	2015-09-08	0	0	70
23454	S80_R	80	2015-09-08	0.02	0.0508	80
25938	S75_R	75	2015-09-08	0	0	75
28422	S72_R	72	2015-09-08	0.13	0.3302	72
30858	S75_R	75	2015-09-08	0	0	75
33294	S84	84	2015-09-08	0.04	0.1016	84
35778	S97_R	97	2015-09-08	0.52	1.3208	97
38262	S84_R	84	2015-09-08	0	0	84
40698	S97_R	97	2015-09-08	0	0	97
43134	S153_R	153	2015-09-08	0.12	0.3048	153
45619	S153_R	153	2015-09-08	0.01	0.0254	153
48103	S153_R	153	2015-09-08	0.01	0.0254	153
50539	S153	153	2015-09-08	0.01	0.0254	153
52975	S46	46	2015-09-08	0	0	46
55411	S49	49	2015-09-08	0	0	49
2078	S153	153	2015-09-09	0	0	153
4514	S46	46	2015-09-09	0	0	46
6950	S49	49	2015-09-09	0.15	0.381	49
8778	S386B_R	386	2015-09-09	0	0	386
11214	S154_R	154	2015-09-09	0	0	154
13630	S386B_R	386	2015-09-09	0	0	386
16114	S70_R	70	2015-09-09	0	0	70
18598	S70_R	70	2015-09-09	0	0	70
20971	S70_R	70	2015-09-09	0	0	70
23455	S80_R	80	2015-09-09	0	0	80
25939	S75_R	75	2015-09-09	0.02	0.0508	75
28423	S72_R	72	2015-09-09	0	0	72
30859	S75_R	75	2015-09-09	0.02	0.0508	75
33295	S84	84	2015-09-09	0	0	84
35779	S97_R	97	2015-09-09	0	0	97
38263	S84_R	84	2015-09-09	0	0	84
40699	S97_R	97	2015-09-09	0.01	0.0254	97
43135	S153_R	153	2015-09-09	0.01	0.0254	153
45620	S153_R	153	2015-09-09	0	0	153
48104	S153_R	153	2015-09-09	0	0	153
50540	S153	153	2015-09-09	0	0	153
52976	S46	46	2015-09-09	0	0	46
55412	S49	49	2015-09-09	0.15	0.381	49
2079	S153	153	2015-09-10	0	0	153
4515	S46	46	2015-09-10	0	0	46
6951	S49	49	2015-09-10	0	0	49
8779	S386B_R	386	2015-09-10	0.13	0.3302	386
11215	S154_R	154	2015-09-10	0	0	154
13631	S386B_R	386	2015-09-10	0.13	0.3302	386
16115	S70_R	70	2015-09-10	0	0	70
18599	S70_R	70	2015-09-10	0	0	70
20972	S70_R	70	2015-09-10	0	0	70
23456	S80_R	80	2015-09-10	0	0	80
25940	S75_R	75	2015-09-10	0.01	0.0254	75
28424	S72_R	72	2015-09-10	0	0	72
30860	S75_R	75	2015-09-10	0.01	0.0254	75
33296	S84	84	2015-09-10	0	0	84
35780	S97_R	97	2015-09-10	0.01	0.0254	97
38264	S84_R	84	2015-09-10	0	0	84
40700	S97_R	97	2015-09-10	0	0	97
43136	S153_R	153	2015-09-10	0	0	153
45621	S153_R	153	2015-09-10	0	0	153
48105	S153_R	153	2015-09-10	0	0	153
50541	S153	153	2015-09-10	0	0	153
52977	S46	46	2015-09-10	0	0	46
55413	S49	49	2015-09-10	0	0	49
2080	S153	153	2015-09-11	1.93	4.902	153
4516	S46	46	2015-09-11	0.02	0.051	46
6952	S49	49	2015-09-11	0.12	0.305	49
8780	S386B_R	386	2015-09-11	0.66	1.6764	386
11216	S154_R	154	2015-09-11	0.19	0.4826	154
13632	S386B_R	386	2015-09-11	0.66	1.6764	386
16116	S70_R	70	2015-09-11	0	0	70
18600	S70_R	70	2015-09-11	0.17	0.4318	70
20973	S70_R	70	2015-09-11	0.17	0.4318	70
23457	S80_R	80	2015-09-11	1.5	3.81	80
25941	S75_R	75	2015-09-11	0.18	0.4572	75
28425	S72_R	72	2015-09-11	0.19	0.4826	72
30861	S75_R	75	2015-09-11	0.18	0.4572	75
33297	S84	84	2015-09-11	0	0	84
35781	S97_R	97	2015-09-11	0	0	97
38265	S84_R	84	2015-09-11	0.15	0.381	84
40701	S97_R	97	2015-09-11	0.41	1.0414	97
43137	S153_R	153	2015-09-11	0	0	153
45622	S153_R	153	2015-09-11	1.93	4.9022	153
48106	S153_R	153	2015-09-11	1.93	4.9022	153
50542	S153	153	2015-09-11	1.93	4.9022	153
52978	S46	46	2015-09-11	0.02	0.0508	46
55414	S49	49	2015-09-11	0.12	0.3048	49
2081	S153	153	2015-09-12	0.01	0.025	153
4517	S46	46	2015-09-12	0	0	46
6953	S49	49	2015-09-12	0.01	0.025	49
8781	S386B_R	386	2015-09-12	0.09	0.2286	386
11217	S154_R	154	2015-09-12	0.22	0.5588	154
13633	S386B_R	386	2015-09-12	0.09	0.2286	386
16117	S70_R	70	2015-09-12	0.18	0.4572	70
18601	S70_R	70	2015-09-12	0.22	0.5588	70
20974	S70_R	70	2015-09-12	0.22	0.5588	70
23458	S80_R	80	2015-09-12	0.01	0.0254	80
25942	S75_R	75	2015-09-12	0.03	0.0762	75
28426	S72_R	72	2015-09-12	0.4	1.016	72
30862	S75_R	75	2015-09-12	0.03	0.0762	75
33298	S84	84	2015-09-12	0.15	0.381	84
35782	S97_R	97	2015-09-12	0.41	1.0414	97
38266	S84_R	84	2015-09-12	0.02	0.0508	84
40702	S97_R	97	2015-09-12	0	0	97
43138	S153_R	153	2015-09-12	1.94	4.9276	153
45623	S153_R	153	2015-09-12	0.01	0.0254	153
48107	S153_R	153	2015-09-12	0.01	0.0254	153
50543	S153	153	2015-09-12	0.01	0.0254	153
52979	S46	46	2015-09-12	0	0	46
55415	S49	49	2015-09-12	0.01	0.0254	49
2082	S153	153	2015-09-13	0	0	153
4518	S46	46	2015-09-13	0.42	1.067	46
6954	S49	49	2015-09-13	0.02	0.051	49
8782	S386B_R	386	2015-09-13	0.3	0.762	386
11218	S154_R	154	2015-09-13	0.25	0.635	154
13634	S386B_R	386	2015-09-13	0.3	0.762	386
16118	S70_R	70	2015-09-13	0.21	0.5334	70
18602	S70_R	70	2015-09-13	0.22	0.5588	70
20975	S70_R	70	2015-09-13	0.22	0.5588	70
23459	S80_R	80	2015-09-13	0	0	80
25943	S75_R	75	2015-09-13	0.19	0.4826	75
28427	S72_R	72	2015-09-13	0.23	0.5842	72
30863	S75_R	75	2015-09-13	0.19	0.4826	75
33299	S84	84	2015-09-13	0.02	0.0508	84
35783	S97_R	97	2015-09-13	0	0	97
38267	S84_R	84	2015-09-13	0.34	0.8636	84
40703	S97_R	97	2015-09-13	0	0	97
43139	S153_R	153	2015-09-13	0	0	153
45624	S153_R	153	2015-09-13	0	0	153
48108	S153_R	153	2015-09-13	0	0	153
50544	S153	153	2015-09-13	0	0	153
52980	S46	46	2015-09-13	0.42	1.0668	46
55416	S49	49	2015-09-13	0.02	0.0508	49
2083	S153	153	2015-09-14	0.62	1.575	153
4519	S46	46	2015-09-14	0	0	46
6955	S49	49	2015-09-14	0	0	49
8783	S386B_R	386	2015-09-14	1.69	4.2926	386
11219	S154_R	154	2015-09-14	0.98	2.4892	154
13635	S386B_R	386	2015-09-14	1.69	4.2926	386
16119	S70_R	70	2015-09-14	0.22	0.5588	70
18603	S70_R	70	2015-09-14	1.66	4.2164	70
20976	S70_R	70	2015-09-14	1.66	4.2164	70
23460	S80_R	80	2015-09-14	0	0	80
25944	S75_R	75	2015-09-14	0.08	0.2032	75
28428	S72_R	72	2015-09-14	0.95	2.413	72
30864	S75_R	75	2015-09-14	0.08	0.2032	75
33300	S84	84	2015-09-14	0.34	0.8636	84
35784	S97_R	97	2015-09-14	0	0	97
38268	S84_R	84	2015-09-14	0.16	0.4064	84
40704	S97_R	97	2015-09-14	0	0	97
43140	S153_R	153	2015-09-14	0	0	153
45625	S153_R	153	2015-09-14	0.62	1.5748	153
48109	S153_R	153	2015-09-14	0.62	1.5748	153
50545	S153	153	2015-09-14	0.62	1.5748	153
52981	S46	46	2015-09-14	0	0	46
55417	S49	49	2015-09-14	0	0	49
2084	S153	153	2015-09-15	0.1	0.254	153
4520	S46	46	2015-09-15	0.9	2.286	46
6956	S49	49	2015-09-15	0.16	0.406	49
8784	S386B_R	386	2015-09-15	0.46	1.1684	386
11220	S154_R	154	2015-09-15	0.07	0.1778	154
13636	S386B_R	386	2015-09-15	0.46	1.1684	386
16120	S70_R	70	2015-09-15	1.66	4.2164	70
18604	S70_R	70	2015-09-15	0.08	0.2032	70
20977	S70_R	70	2015-09-15	0.08	0.2032	70
23461	S80_R	80	2015-09-15	0.28	0.7112	80
25945	S75_R	75	2015-09-15	0.11	0.2794	75
28429	S72_R	72	2015-09-15	0.36	0.9144	72
30865	S75_R	75	2015-09-15	0.11	0.2794	75
33301	S84	84	2015-09-15	0.16	0.4064	84
35785	S97_R	97	2015-09-15	0	0	97
38269	S84_R	84	2015-09-15	0.49	1.2446	84
40705	S97_R	97	2015-09-15	0.02	0.0508	97
43141	S153_R	153	2015-09-15	0.62	1.5748	153
45626	S153_R	153	2015-09-15	0.1	0.254	153
48110	S153_R	153	2015-09-15	0.1	0.254	153
50546	S153	153	2015-09-15	0.1	0.254	153
52982	S46	46	2015-09-15	0.9	2.286	46
55418	S49	49	2015-09-15	0.16	0.4064	49
2085	S153	153	2015-09-16	0.11	0.279	153
4521	S46	46	2015-09-16	2.91	7.391	46
6957	S49	49	2015-09-16	1.59	4.039	49
8785	S386B_R	386	2015-09-16	0.48	1.2192	386
11221	S154_R	154	2015-09-16	0.19	0.4826	154
13637	S386B_R	386	2015-09-16	0.48	1.2192	386
16121	S70_R	70	2015-09-16	0.08	0.2032	70
18605	S70_R	70	2015-09-16	0.04	0.1016	70
20978	S70_R	70	2015-09-16	0.04	0.1016	70
23462	S80_R	80	2015-09-16	1.73	4.3942	80
25946	S75_R	75	2015-09-16	0	0	75
28430	S72_R	72	2015-09-16	0.1	0.254	72
30866	S75_R	75	2015-09-16	0	0	75
33302	S84	84	2015-09-16	0.57	1.4478	84
35786	S97_R	97	2015-09-16	0.25	0.635	97
38270	S84_R	84	2015-09-16	0.09	0.2286	84
40706	S97_R	97	2015-09-16	0.81	2.0574	97
43142	S153_R	153	2015-09-16	0.2	0.508	153
45627	S153_R	153	2015-09-16	0.11	0.2794	153
48111	S153_R	153	2015-09-16	0.11	0.2794	153
50547	S153	153	2015-09-16	0.11	0.2794	153
52983	S46	46	2015-09-16	2.91	7.3914	46
55419	S49	49	2015-09-16	1.59	4.0386	49
2086	S153	153	2015-09-17	3.42	8.687	153
4522	S46	46	2015-09-17	1.97	5.004	46
6958	S49	49	2015-09-17	2.7	6.858	49
8786	S386B_R	386	2015-09-17	1.44	3.6576	386
11222	S154_R	154	2015-09-17	1.69	4.2926	154
13638	S386B_R	386	2015-09-17	1.44	3.6576	386
16122	S70_R	70	2015-09-17	0.15	0.381	70
18606	S70_R	70	2015-09-17	1.68	4.2672	70
20979	S70_R	70	2015-09-17	1.68	4.2672	70
23463	S80_R	80	2015-09-17	2.39	6.0706	80
25947	S75_R	75	2015-09-17	1.87	4.7498	75
28431	S72_R	72	2015-09-17	0.67	1.7018	72
30867	S75_R	75	2015-09-17	1.87	4.7498	75
33303	S84	84	2015-09-17	0.34	0.8636	84
35787	S97_R	97	2015-09-17	1.6	4.064	97
38271	S84_R	84	2015-09-17	0.73	1.8542	84
40707	S97_R	97	2015-09-17	4.77	12.1158	97
43143	S153_R	153	2015-09-17	1.08	2.7432	153
45628	S153_R	153	2015-09-17	3.42	8.6868	153
48112	S153_R	153	2015-09-17	3.42	8.6868	153
50548	S153	153	2015-09-17	3.42	8.6868	153
52984	S46	46	2015-09-17	1.97	5.0038	46
55420	S49	49	2015-09-17	2.7	6.858	49
2087	S153	153	2015-09-18	0.03	0.076	153
4523	S46	46	2015-09-18	0.07	0.178	46
6959	S49	49	2015-09-18	0.36	0.914	49
8787	S386B_R	386	2015-09-18	0.01	0.0254	386
11223	S154_R	154	2015-09-18	0	0	154
13639	S386B_R	386	2015-09-18	0.01	0.0254	386
16123	S70_R	70	2015-09-18	1.58	4.0132	70
18607	S70_R	70	2015-09-18	0.01	0.0254	70
20980	S70_R	70	2015-09-18	0.01	0.0254	70
23464	S80_R	80	2015-09-18	0.45	1.143	80
25948	S75_R	75	2015-09-18	0	0	75
28432	S72_R	72	2015-09-18	0.01	0.0254	72
30868	S75_R	75	2015-09-18	0	0	75
33304	S84	84	2015-09-18	0.4	1.016	84
35788	S97_R	97	2015-09-18	3.76	9.5504	97
38272	S84_R	84	2015-09-18	0.01	0.0254	84
40708	S97_R	97	2015-09-18	0.3	0.762	97
43144	S153_R	153	2015-09-18	2.36	5.9944	153
45629	S153_R	153	2015-09-18	0.03	0.0762	153
48113	S153_R	153	2015-09-18	0.03	0.0762	153
50549	S153	153	2015-09-18	0.03	0.0762	153
52985	S46	46	2015-09-18	0.07	0.1778	46
55421	S49	49	2015-09-18	0.36	0.9144	49
2088	S153	153	2015-09-19	0.23	0.584	153
4524	S46	46	2015-09-19	0.08	0.203	46
6960	S49	49	2015-09-19	0.01	0.025	49
8788	S386B_R	386	2015-09-19	0.01	0.0254	386
11224	S154_R	154	2015-09-19	0.01	0.0254	154
13640	S386B_R	386	2015-09-19	0.01	0.0254	386
16124	S70_R	70	2015-09-19	0	0	70
18608	S70_R	70	2015-09-19	0	0	70
20981	S70_R	70	2015-09-19	0	0	70
23465	S80_R	80	2015-09-19	0	0	80
25949	S75_R	75	2015-09-19	0.01	0.0254	75
28433	S72_R	72	2015-09-19	0	0	72
30869	S75_R	75	2015-09-19	0.01	0.0254	75
33305	S84	84	2015-09-19	0.01	0.0254	84
35789	S97_R	97	2015-09-19	0.29	0.7366	97
38273	S84_R	84	2015-09-19	0	0	84
40709	S97_R	97	2015-09-19	0.01	0.0254	97
43145	S153_R	153	2015-09-19	0.06	0.1524	153
45630	S153_R	153	2015-09-19	0.23	0.5842	153
48114	S153_R	153	2015-09-19	0.23	0.5842	153
50550	S153	153	2015-09-19	0.23	0.5842	153
52986	S46	46	2015-09-19	0.08	0.2032	46
55422	S49	49	2015-09-19	0.01	0.0254	49
2089	S153	153	2015-09-20	0	0	153
4525	S46	46	2015-09-20	0	0	46
6961	S49	49	2015-09-20	0	0	49
8789	S386B_R	386	2015-09-20	0	0	386
11225	S154_R	154	2015-09-20	0	0	154
13641	S386B_R	386	2015-09-20	0	0	386
16125	S70_R	70	2015-09-20	0	0	70
18609	S70_R	70	2015-09-20	0	0	70
20982	S70_R	70	2015-09-20	0	0	70
23466	S80_R	80	2015-09-20	0	0	80
25950	S75_R	75	2015-09-20	0	0	75
28434	S72_R	72	2015-09-20	0	0	72
30870	S75_R	75	2015-09-20	0	0	75
33306	S84	84	2015-09-20	0	0	84
35790	S97_R	97	2015-09-20	0.01	0.0254	97
38274	S84_R	84	2015-09-20	0	0	84
40710	S97_R	97	2015-09-20	0	0	97
43146	S153_R	153	2015-09-20	0.19	0.4826	153
45631	S153_R	153	2015-09-20	0	0	153
48115	S153_R	153	2015-09-20	0	0	153
50551	S153	153	2015-09-20	0	0	153
52987	S46	46	2015-09-20	0	0	46
55423	S49	49	2015-09-20	0	0	49
2090	S153	153	2015-09-21	0.01	0.025	153
4526	S46	46	2015-09-21	0	0	46
6962	S49	49	2015-09-21	0.01	0.025	49
8790	S386B_R	386	2015-09-21	0	0	386
11226	S154_R	154	2015-09-21	0	0	154
13642	S386B_R	386	2015-09-21	0	0	386
16126	S70_R	70	2015-09-21	0	0	70
18610	S70_R	70	2015-09-21	0	0	70
20983	S70_R	70	2015-09-21	0	0	70
23467	S80_R	80	2015-09-21	0	0	80
25951	S75_R	75	2015-09-21	0	0	75
28435	S72_R	72	2015-09-21	0	0	72
30871	S75_R	75	2015-09-21	0	0	75
33307	S84	84	2015-09-21	0	0	84
35791	S97_R	97	2015-09-21	0	0	97
38275	S84_R	84	2015-09-21	0	0	84
40711	S97_R	97	2015-09-21	0	0	97
43147	S153_R	153	2015-09-21	0	0	153
45632	S153_R	153	2015-09-21	0.01	0.0254	153
48116	S153_R	153	2015-09-21	0.01	0.0254	153
50552	S153	153	2015-09-21	0.01	0.0254	153
52988	S46	46	2015-09-21	0	0	46
55424	S49	49	2015-09-21	0.01	0.0254	49
2091	S153	153	2015-09-22	0.01	0.025	153
4527	S46	46	2015-09-22	0.07	0.178	46
6963	S49	49	2015-09-22	0	0	49
8791	S386B_R	386	2015-09-22	0.01	0.0254	386
11227	S154_R	154	2015-09-22	0.01	0.0254	154
13643	S386B_R	386	2015-09-22	0.01	0.0254	386
16127	S70_R	70	2015-09-22	0	0	70
18611	S70_R	70	2015-09-22	0	0	70
20984	S70_R	70	2015-09-22	0	0	70
23468	S80_R	80	2015-09-22	0.01	0.0254	80
25952	S75_R	75	2015-09-22	0	0	75
28436	S72_R	72	2015-09-22	0.01	0.0254	72
30872	S75_R	75	2015-09-22	0	0	75
33308	S84	84	2015-09-22	0	0	84
35792	S97_R	97	2015-09-22	0	0	97
38276	S84_R	84	2015-09-22	0	0	84
40712	S97_R	97	2015-09-22	0	0	97
43148	S153_R	153	2015-09-22	0	0	153
45633	S153_R	153	2015-09-22	0.01	0.0254	153
48117	S153_R	153	2015-09-22	0.01	0.0254	153
50553	S153	153	2015-09-22	0.01	0.0254	153
52989	S46	46	2015-09-22	0.07	0.1778	46
55425	S49	49	2015-09-22	0	0	49
2092	S153	153	2015-09-23	0	0	153
4528	S46	46	2015-09-23	0.02	0.051	46
6964	S49	49	2015-09-23	0	0	49
8792	S386B_R	386	2015-09-23	0.09	0.2286	386
11228	S154_R	154	2015-09-23	0.02	0.0508	154
13644	S386B_R	386	2015-09-23	0.09	0.2286	386
16128	S70_R	70	2015-09-23	0	0	70
18612	S70_R	70	2015-09-23	0	0	70
20985	S70_R	70	2015-09-23	0	0	70
23469	S80_R	80	2015-09-23	0	0	80
25953	S75_R	75	2015-09-23	0	0	75
28437	S72_R	72	2015-09-23	0.25	0.635	72
30873	S75_R	75	2015-09-23	0	0	75
33309	S84	84	2015-09-23	0	0	84
35793	S97_R	97	2015-09-23	0	0	97
38277	S84_R	84	2015-09-23	0.02	0.0508	84
40713	S97_R	97	2015-09-23	0	0	97
43149	S153_R	153	2015-09-23	0.01	0.0254	153
45634	S153_R	153	2015-09-23	0	0	153
48118	S153_R	153	2015-09-23	0	0	153
50554	S153	153	2015-09-23	0	0	153
52990	S46	46	2015-09-23	0.02	0.0508	46
55426	S49	49	2015-09-23	0	0	49
2093	S153	153	2015-09-24	0.02	0.051	153
4529	S46	46	2015-09-24	0.13	0.33	46
6965	S49	49	2015-09-24	0	0	49
8793	S386B_R	386	2015-09-24	0.01	0.0254	386
11229	S154_R	154	2015-09-24	0.01	0.0254	154
13645	S386B_R	386	2015-09-24	0.01	0.0254	386
16129	S70_R	70	2015-09-24	0	0	70
18613	S70_R	70	2015-09-24	0	0	70
20986	S70_R	70	2015-09-24	0	0	70
23470	S80_R	80	2015-09-24	0	0	80
25954	S75_R	75	2015-09-24	0	0	75
28438	S72_R	72	2015-09-24	0	0	72
30874	S75_R	75	2015-09-24	0	0	75
33310	S84	84	2015-09-24	0.03	0.0762	84
35794	S97_R	97	2015-09-24	0.01	0.0254	97
38278	S84_R	84	2015-09-24	0.01	0.0254	84
40714	S97_R	97	2015-09-24	0.01	0.0254	97
43150	S153_R	153	2015-09-24	0	0	153
45635	S153_R	153	2015-09-24	0.02	0.0508	153
48119	S153_R	153	2015-09-24	0.02	0.0508	153
50555	S153	153	2015-09-24	0.02	0.0508	153
52991	S46	46	2015-09-24	0.13	0.3302	46
55427	S49	49	2015-09-24	0	0	49
2094	S153	153	2015-09-25	0	0	153
4530	S46	46	2015-09-25	0.21	0.533	46
6966	S49	49	2015-09-25	0.19	0.483	49
8794	S386B_R	386	2015-09-25	0.05	0.127	386
11230	S154_R	154	2015-09-25	0.64	1.6256	154
13646	S386B_R	386	2015-09-25	0.05	0.127	386
16130	S70_R	70	2015-09-25	0	0	70
18614	S70_R	70	2015-09-25	2.72	6.9088	70
20987	S70_R	70	2015-09-25	2.72	6.9088	70
23471	S80_R	80	2015-09-25	0	0	80
25955	S75_R	75	2015-09-25	0.18	0.4572	75
28439	S72_R	72	2015-09-25	0.06	0.1524	72
30875	S75_R	75	2015-09-25	0.18	0.4572	75
33311	S84	84	2015-09-25	0	0	84
35795	S97_R	97	2015-09-25	0	0	97
38279	S84_R	84	2015-09-25	0.98	2.4892	84
40715	S97_R	97	2015-09-25	0	0	97
43151	S153_R	153	2015-09-25	0.02	0.0508	153
45636	S153_R	153	2015-09-25	0	0	153
48120	S153_R	153	2015-09-25	0	0	153
50556	S153	153	2015-09-25	0	0	153
[truncated: 1,175 more rows]

## Sheet: Sheet9
dates	S46	S49	S70	S72	S75	S80	S84	S97	S153	S154	S386	average	stdev
2015-07-01	0	0.0504	3.2512	0	0	0	2.7432	1.3716	0.9146	0	0.3048	0.785073	1.18865
2015-07-02	0	0	0	0	0	0.0254	0	0	0.0254	0	0	0.00461818	0.0102748
2015-07-03	0	0	0	0	0.0508	1.2192	0.4318	0.0762	0	0.6604	0.1524	0.235527	0.391208
2015-07-04	1.016	0	0	0	0	0	0.4318	0.0762	16.764	0	1.1176	1.76415	4.9927
2015-07-05	0.1018	1.524	3.8608	1.4986	4.1656	0.254	2.3622	0.3556	4.3944	1.6256	3.7084	2.16827	1.63088
2015-07-06	1.2196	1.27	2.3876	0.0254	0.0508	0	2.413	0.762	0.4576	0.0254	0.0508	0.787473	0.927296
2015-07-07	0.3558	0.1018	1.6256	0	0.3048	2.0574	0	0.0254	12.3948	0	7.0612	2.17516	3.98187
2015-07-08	0	0	0.8128	0	0.0508	0.0254	0	0	3.0734	0	0.0508	0.364836	0.92995
2015-07-09	0.2036	0	1.27	0	0.1016	0	0	0	0	0	0	0.1432	0.379356
2015-07-10	0	0	0.635	0	0.0508	0	0	0	0	0	0	0.0623455	0.190538
2015-07-11	0	0	0	0	0	0	0	0	0	0	0	0	0
2015-07-12	0	0	0	0	0	0	0	0	0	0	0	0	0
2015-07-13	0	0	0.3048	0	3.4544	0	0	0	0	0	0	0.341745	1.03639
2015-07-14	0	0	0.2032	0	0.1524	0.4572	0.0762	0	0	0	0	0.0808182	0.144051
2015-07-15	3.9622	0.3044	1.3462	0.762	2.1844	0.7874	0.4826	0	1.8286	0.1778	0.3556	1.10829	1.17471
2015-07-16	0.6098	4.7756	3.6068	0.5842	2.5908	1.9558	0.4572	2.4638	0.6606	0	0.1016	1.61875	1.58013
2015-07-17	8.5856	0.508	1.4732	0.0254	0.0508	0	0.0762	0.0508	0.0508	2.1082	0.3048	1.20307	2.54502
2015-07-18	0.0504	2.7436	0.0762	0.1524	0	1.016	0.0254	6.5024	0	0	0	0.960582	2.018
2015-07-19	0	0	0.1524	1.1938	0.4064	0	0.4572	6.8326	0	2.1082	0	1.01369	2.04079
2015-07-20	1.0664	9.7024	0.381	0	0	0.1524	0.9144	0.762	0	0	0	1.17987	2.85562
2015-07-21	0	0.0504	0.1524	0	0	0.2286	0.4572	0.4318	7.62	0.1524	1.8796	0.997491	2.26162
2015-07-22	1.5744	3.2516	0	0	1.8288	0	0	2.3114	4.3438	0	1.0668	1.30698	1.5151
2015-07-23	2.794	2.3878	0.1016	0.0508	2.7432	3.2766	0.2286	5.588	1.0164	0.7366	0.0508	1.72495	1.7863
2015-07-24	1.0664	1.27	2.1336	1.7018	1.524	0.3556	0.9652	3.8862	7.7216	1.8288	6.1468	2.6	2.34675
2015-07-25	5.7916	1.6258	1.0414	2.0574	0	0.127	0.7366	0.9652	4.5462	0.0254	5.4356	2.03202	2.18604
2015-07-26	1.016	0.2036	0.1016	0.1524	0.1016	0.5588	0.0508	0.5588	1.981	0.0508	0.4572	0.475691	0.58237
2015-07-27	0.7116	0	0.3556	0.0762	1.524	0	0.2794	0.2032	0.3302	1.4478	0.4572	0.489564	0.534636
2015-07-28	0	0	0.2286	0	0	0	0.2286	0	0	0	0	0.0415636	0.0924733
2015-07-29	0	1.4222	1.7272	2.5908	1.4224	0.4826	0.4318	2.0574	2.032	1.3462	2.7432	1.4778	0.885279
2015-07-30	0.4576	1.7276	3.9878	0.5588	0.3556	1.9558	1.2192	2.0066	0.508	0.2286	0.6604	1.24236	1.12435
2015-07-31	3.9118	3.9622	1.8034	0.0254	0.1524	1.9558	1.3208	3.2258	25.5012	0	0	3.80535	7.35715
2015-08-01	0.4062	10.7698	1.5748	2.0828	3.9624	1.524	0.9398	4.953	9.1438	0.8128	3.556	3.6114	3.46209
2015-08-02	0.1522	0.0504	1.5494	1.27	0.0508	2.286	3.5814	1.4224	0.965	0.7874	1.016	1.19373	1.05004
2015-08-03	0.5584	0	0.4064	0.0254	0	0.0762	3.175	0	0.2032	0.0254	0	0.406364	0.937525
2015-08-04	0.0504	0	0	0	0	0	0	0	0	0	0	0.00458182	0.0151962
2015-08-05	0.4062	2.286	0	0	0	0.889	0	1.3716	1.4228	0	0	0.5796	0.799466
2015-08-06	0	0.0504	0	0	0	0	0	1.3716	0.3556	0	0	0.1616	0.415093
2015-08-07	0	0	0	0	0	0	0	0	0	0	0	0	0
2015-08-08	0	0.0504	0.3048	0.2032	0.8636	0	0.1524	0	0.2034	0.1524	0.8128	0.249364	0.307734
2015-08-09	0	0	0.1524	0.4064	0	0	0.1524	0	0.0508	0.0254	0	0.0715818	0.125887
2015-08-10	1.7276	0	0.0762	0.1016	0	0.1524	0.8128	1.9812	0	1.3716	0	0.565764	0.772662
2015-08-11	0	0	0	0	0	0.635	0.8382	2.1844	0	0.2032	0	0.350982	0.675546
2015-08-12	0	0	0.2032	0.2794	0	0	0.381	0.2032	0	1.4986	1.2192	0.344055	0.523063
2015-08-13	3.048	5.842	8.5852	0.8382	5.7912	0.4064	1.7018	1.2192	4.8766	2.7178	1.524	3.32276	2.60682
2015-08-14	0	2.032	5.4102	0.4064	1.1684	0.1778	1.8542	1.2446	2.7432	0.3302	0	1.397	1.61601
2015-08-15	2.0824	1.2196	3.7846	0.3302	3.4036	0.3302	2.5654	0.3048	12.8776	0.5334	0.0508	2.49842	3.68891
2015-08-16	1.8284	0.7116	1.6002	0.0254	0.0508	0	2.1082	0.3048	3.2254	0.0254	0.508	0.944382	1.08638
2015-08-17	0	2.0824	0	0	0	0	0	0.0254	0.0254	0	0.5588	0.244727	0.631754
2015-08-18	0	3.048	0	0	0	0	0	3.1242	0.4068	0	0.2032	0.616564	1.22785
2015-08-19	0	0	0.0508	0.5842	1.0668	0	0	3.1496	0.4062	0.2286	0	0.498745	0.942494
2015-08-20	0	0	0.1016	0.0254	0.0508	0	0	0.0254	0.0762	0	0	0.0254	0.035921
2015-08-21	0	0.4576	0	0.2794	0.2032	0.9144	0.0762	0	0	0.0254	0.1524	0.191691	0.281133
2015-08-22	0	0.0504	0	0	0.0508	0	0.0762	0	0	0.0254	0.2032	0.0369091	0.0615447
2015-08-23	0	0	0	0	0	0	0	0	10.16	0	0.0508	0.928255	3.06186
2015-08-24	0	0	0	1.0668	0	0	0.2286	0	2.54	1.4224	1.4224	0.607291	0.873587
2015-08-25	0.1018	5.7402	0.762	0.0254	0	0.6858	0.2286	2.159	0.1012	0.0254	0.0508	0.8982	1.72813
2015-08-26	1.0664	7.62	2.7178	0.0254	2.54	0.5842	0.127	2.8956	1.0414	0.0508	0	1.69715	2.26243
2015-08-27	7.9244	0.508	3.3782	1.4986	1.524	3.81	0.8636	0.9906	4.4192	0.2794	0.0508	2.29516	2.38626
2015-08-28	5.588	0.5584	4.4704	0.6096	5.2832	0.0254	1.0668	0.508	4.0894	0.3302	9.0932	2.87478	2.99688
2015-08-29	0.4576	0.7116	2.5654	2.1082	1.6764	1.9304	1.7018	0.9652	1.092	0.4826	2.2352	1.44785	0.739488
2015-08-30	10.9724	5.08	1.7526	0.3048	0.762	0.762	1.778	4.1656	5.004	5.6388	9.0932	4.1194	3.51991
2015-08-31	0	1.3718	3.556	0	1.8288	0	0.4572	2.667	3.1492	0	0.1524	1.1984	1.39055
2015-09-01	0	0.1018	1.4478	0.0254	0.0508	0.0254	0	0.2794	1.8794	0	0.0508	0.350982	0.660914
2015-09-02	0	0	0	0	0	0	0	0.0254	0.3048	0	0	0.0300182	0.0914528
2015-09-03	0.8124	1.7276	1.1684	0	0	0.4064	0	0	0	0	0	0.374073	0.602966
2015-09-04	1.8798	0.0504	2.032	0.1778	0.508	0.508	0.0762	1.5748	0	0.1016	0	0.628055	0.798129
2015-09-05	8.8396	1.7276	2.6416	2.5146	7.6708	0.1524	2.2606	1.8796	8.5348	2.54	8.9408	4.33658	3.38081
2015-09-06	0	0.3558	5.207	2.9464	3.8608	0	2.5146	2.0828	2.1336	1.2954	2.3368	2.06665	1.61855
2015-09-07	3.4542	4.064	2.4384	0.1016	0.1524	0.3302	0.8382	1.3208	1.2194	0.2032	0.0508	1.28847	1.4231
2015-09-08	0	0	0.1524	0.3302	0	0.0508	0.1016	1.3208	0.406	0.0254	0	0.217018	0.392057
2015-09-09	0	0.762	0	0	0.1016	0	0	0.0254	0.0254	0	0	0.0831273	0.22721
2015-09-10	0	0	0	0	0.0508	0	0	0.0254	0	0	0.6604	0.0669636	0.197491
2015-09-11	0.1018	0.6098	0.8636	0.4826	0.9144	3.81	0.381	1.0414	19.6086	0.4826	3.3528	2.87715	5.68205
2015-09-12	0	0.0504	1.5748	1.016	0.1524	0.0254	0.4318	1.0414	5.0288	0.5588	0.4572	0.939727	1.44588
2015-09-13	2.1338	0.1018	1.651	0.5842	0.9652	0	0.9144	0	0	0.635	1.524	0.773582	0.744404
2015-09-14	0	0	8.9916	2.413	0.4064	0	1.27	0	6.2994	2.4892	8.5852	2.76862	3.51733
2015-09-15	4.572	0.8124	4.6228	0.9144	0.5588	0.7112	1.651	0.0508	2.5908	0.1778	2.3368	1.72716	1.63421
2015-09-16	14.7824	8.0776	0.4064	0.254	0	4.3942	1.6764	2.6924	1.6252	0.4826	2.4384	3.34815	4.45953
2015-09-17	10.0078	13.716	8.9154	1.7018	9.4996	6.0706	2.7178	16.1798	37.4906	4.2926	7.3152	10.7188	9.90246
2015-09-18	0.3558	1.8284	4.064	0.0254	0	1.143	1.0414	10.3124	6.299	0	0.0508	2.28365	3.33222
2015-09-19	0.4062	0.0504	0	0	0.0508	0	0.0254	0.762	2.489	0.0254	0.0508	0.350909	0.748014
2015-09-20	0	0	0	0	0	0	0	0.0254	0.4826	0	0	0.0461818	0.144944
2015-09-21	0	0.0504	0	0	0	0	0	0	0.1012	0	0	0.0137818	0.032699
2015-09-22	0.3558	0	0	0.0254	0	0.0254	0	0	0.1012	0.0254	0.0508	0.0530909	0.105046
2015-09-23	0.1018	0	0	0.635	0	0	0.0508	0	0.0254	0.0508	0.4572	0.120091	0.216746
2015-09-24	0.6602	0	0	0	0	0	0.1016	0.0508	0.2034	0.0254	0.0508	0.0992909	0.196194
2015-09-25	1.0664	0.9656	13.8176	0.1524	0.9144	0	2.4892	0	0.0508	1.6256	0.254	1.93964	4.01717
2015-09-26	0	0.1018	6.985	0	0	0	2.4892	0.0254	6.5282	0	0.4572	1.50789	2.69838
2015-09-27	0	0	0.0508	0	0	0	0	0.0762	2.1082	0	5.0292	0.6604	1.5795
2015-09-28	2.3878	0	0.9398	0.0762	1.9304	0.0254	1.143	0.1778	0.127	0	0	0.618855	0.863661
2015-09-29	0.0504	0.4576	3.4036	0.8128	2.1336	0.0762	1.9812	0.2286	0.8126	0.8128	1.8796	1.14991	1.06307
2015-09-30	0	0.1018	0.9398	0	0.0508	0	0.5334	0.127	0.2032	0.0254	0	0.180127	0.296959
2015-10-01	0	0	0	0	0	0	0	0.0254	0	0	0	0.00230909	0.00765839
2015-10-02	0	0	0	0	0	0	0	0	0.8126	0.1524	0	0.0877273	0.244722
2015-10-03	0	0	0	0	0	0	0	0.0508	0.2032	0	0	0.0230909	0.0616488
2015-10-04	0.3558	1.778	2.1336	0.6096	1.0668	0.254	0.4826	0.6604	1.9308	0.5588	1.5748	1.03684	0.69125
2015-10-05	0.6098	0.0504	1.0668	0	0.0508	1.1684	0.0762	0.6858	0.8894	0.0254	0	0.420273	0.469583
2015-10-06	0.0504	0	0	0.0254	0.0508	0	0	0.0254	0.1016	0	0	0.0230545	0.0329955
2015-10-07	0	0	0	0	0	0.3048	0.0254	0	0	0	0	0.0300182	0.0914528
2015-10-08	1.1682	0.1522	0	0	0	0.4064	0	0.0508	0	0	0	0.1616	0.356137
2015-10-09	0.1018	0	1.8288	0.0254	0.0508	0	0	0.0508	0	0	1.6764	0.339455	0.700248
2015-10-10	0	0.3044	2.794	1.0414	2.6924	0	1.524	0.254	1.016	1.8288	1.3208	1.16144	0.995124
2015-10-11	0	0.0504	2.7432	0.8128	0.4572	0	1.6256	0.3048	0.254	0.1778	0.3048	0.611873	0.84874
2015-10-12	0	0	0.8636	0	0	0	0.1016	0	0	0	0	0.0877455	0.259121
2015-10-13	0	0	0	0	0	0.2032	0	0.2794	0	0	0	0.0438727	0.0990866
2015-10-14	0	0	0	0.0254	0	0	0	0.3302	0	0.0254	0	0.0346364	0.0985525
2015-10-15	0.0504	0	0	0	0	0	0	0	0	0	0	0.00458182	0.0151962
2015-10-16	0	0	0	0	0	0.0254	0	0	0	0	0	0.00230909	0.00765839
2015-10-17	0	0	0	0	0	2.4384	0	0	0	0	0	0.221673	0.735205
2015-10-18	0	0.0504	0	0	0.0508	0	0	0	0.4068	0	0	0.0461818	0.121304
2015-10-19	0	0	0	0	0	0	0	0	0.1016	0	0	0.00923636	0.0306336
2015-10-20	0	0	0	0	0	0.0254	0	0	0	0	0	0.00230909	0.00765839
2015-10-21	1.1682	0.0504	0.1524	0	0.2032	0.1016	0	0.1016	0.1012	0.127	0	0.182327	0.33363
2015-10-22	0.6098	1.778	0	0	0	0.7112	0.0508	0.8382	0.33	0.0254	0	0.394855	0.560236
2015-10-23	0	0.8124	0.508	0.2794	0.254	0.1778	0.508	2.0574	0.3808	0.2286	0.4064	0.510255	0.555129
2015-10-24	0	0	0.0254	0	0	0	0	0.1016	0.0762	0	0	0.0184727	0.0360839
2015-10-25	0	0	0	0	0	0	0	0.0508	0	0.0254	0	0.00692727	0.0164254
2015-10-26	0	0	0	0	0	0	0	0.0254	0.1012	0	0.0508	0.0161273	0.0325673
2015-10-27	0.0504	0	0	0	0	0	0	0.0254	0.1266	0	0	0.0184	0.0393557
2015-10-28	0.0504	0.1018	3.8354	0.0762	4.0132	0	1.7018	0.8128	0.0254	0.2286	0	0.985964	1.54114
2015-10-29	0	0.1018	0.0508	0	0.0508	0	0.0254	0.8382	0	0	0	0.097	0.248042
2015-10-30	0	0	0	0	0	0	0	0.0254	0	0	0	0.00230909	0.00765839
2015-10-31	0	0	0	0	0	0	0	0	0	0	0	0	0
2015-11-01	0	0	0	0	0	0	0	0	0	0	0	0	0
2015-11-02	0	0	0.0762	0	0	0	0	0	0	0	0	0.00692727	0.0229752
2015-11-03	0	0	0	0	0	0	0	0	0	0	0	0	0
2015-11-04	0	0.1522	0	0	0	0	0.0254	0.6858	0	0	0	0.0784909	0.206485
2015-11-05	0	0	0	0	0	0	0.0254	0.6858	0	0	0	0.0646545	0.206152
2015-11-06	0	0	0	0	0.0508	0	0	0.0508	0.1012	0	0.0508	0.0230545	0.0348378
2015-11-07	0.3558	0.1522	0	0	0	0	0	0	0.0254	0	0	0.0484909	0.111597
2015-11-08	0	0	0	0	0	0	0	0.0508	0	0	0	0.00461818	0.0153168
2015-11-09	0	0	2.1336	0.0254	0.4572	0	0.1016	0	0.1012	0.0508	0	0.260891	0.635324
2015-11-10	0	0	7.4422	0.2286	0.9652	0	0.1524	0.2032	0.5334	0.3048	1.778	1.05525	2.18459
2015-11-11	0.1018	0	3.1496	0	0	0	0.0508	0	0.127	0.0254	0.0508	0.318673	0.939958
2015-11-12	0	0	0	0	0	0	0	0	0	0	0	0	0
2015-11-13	3.81	1.1682	0.8128	0.7874	1.27	2.4384	0.5842	0.7874	0	0.0762	2.1844	1.26536	1.13341
2015-11-14	0.1018	0	0.4064	0	0	0	0.5842	0.7874	0	0	0	0.170891	0.285582
2015-11-15	0	0	0	0	0	0	0	0	0	0	0	0	0
